# Supplementary material for: Integrating Proteomics and Transcriptomics Reveals the Potential Pathways of Hippocampal Neuron Apoptosis in Dravet Syndrome Model Mice
Source: MDPI journal article supplement (doi:10.3390/ijms25084457), 2024-04-18
Supplement: s1 [file s1]

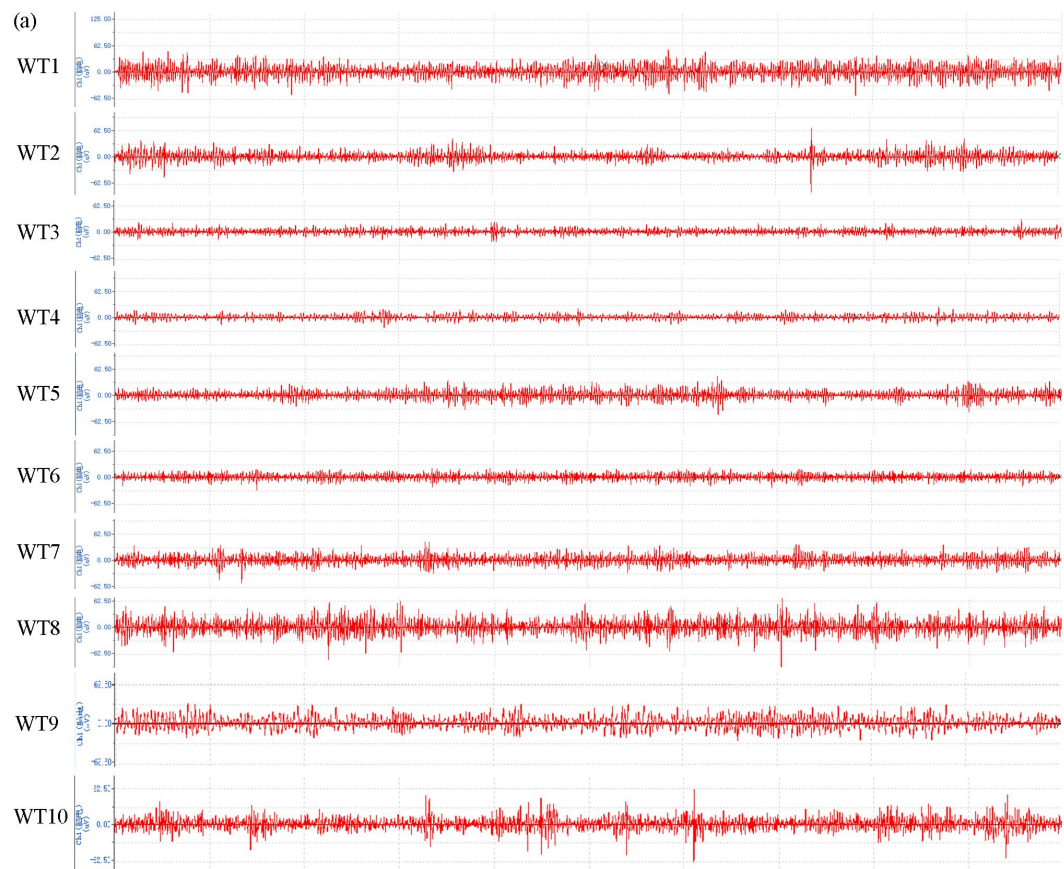

(b)

KO1

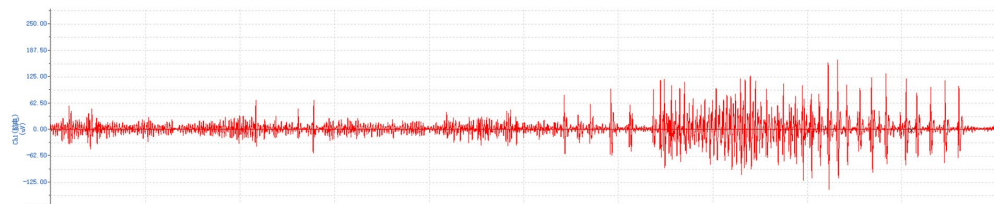

KO2

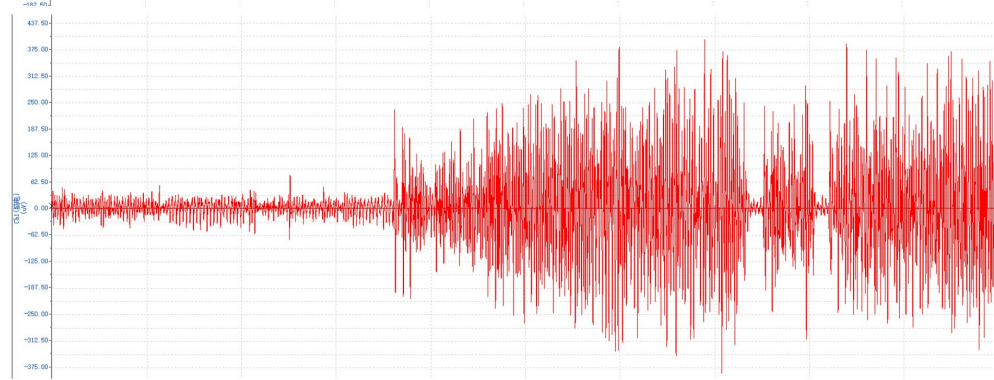

KO3

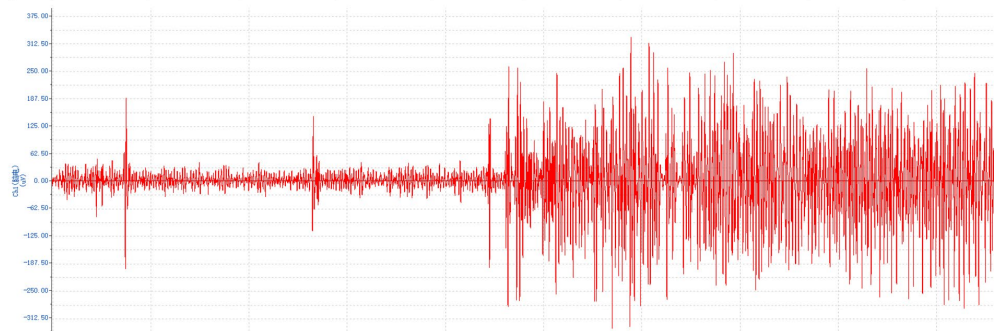

KO4

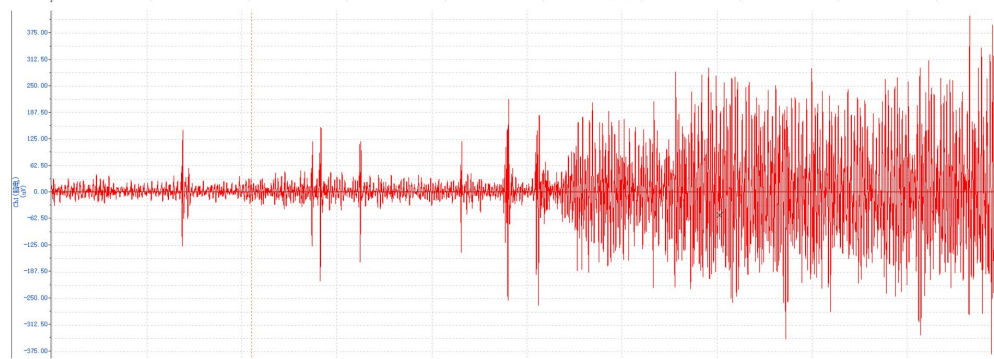

KO5

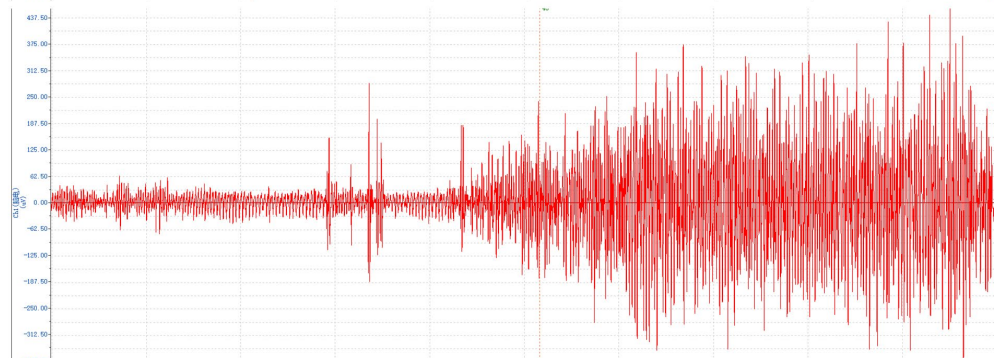

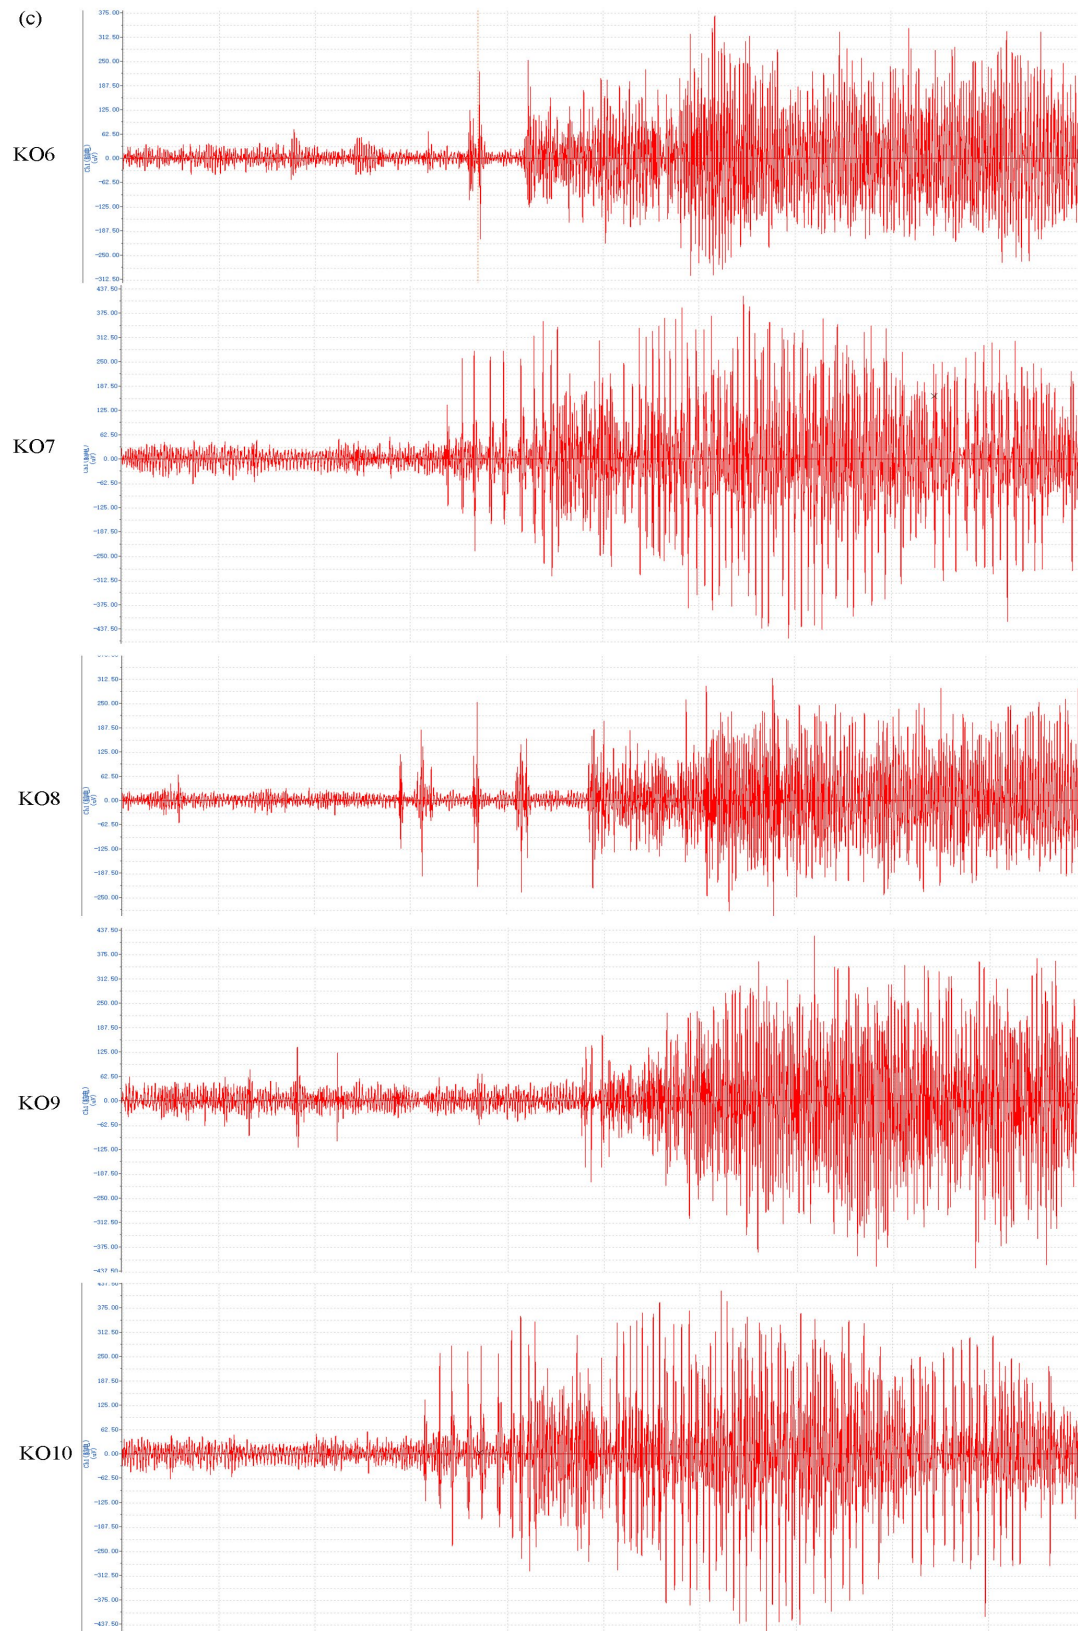

**Figure S1. EEG recordings of 10 KO mice and 10 WT mice**

(a) EEG recordings of WT mice. (b) EEG recordings of KO mice number 1 to 5. (c) EEG recordings of KO mice number 6 to 10.



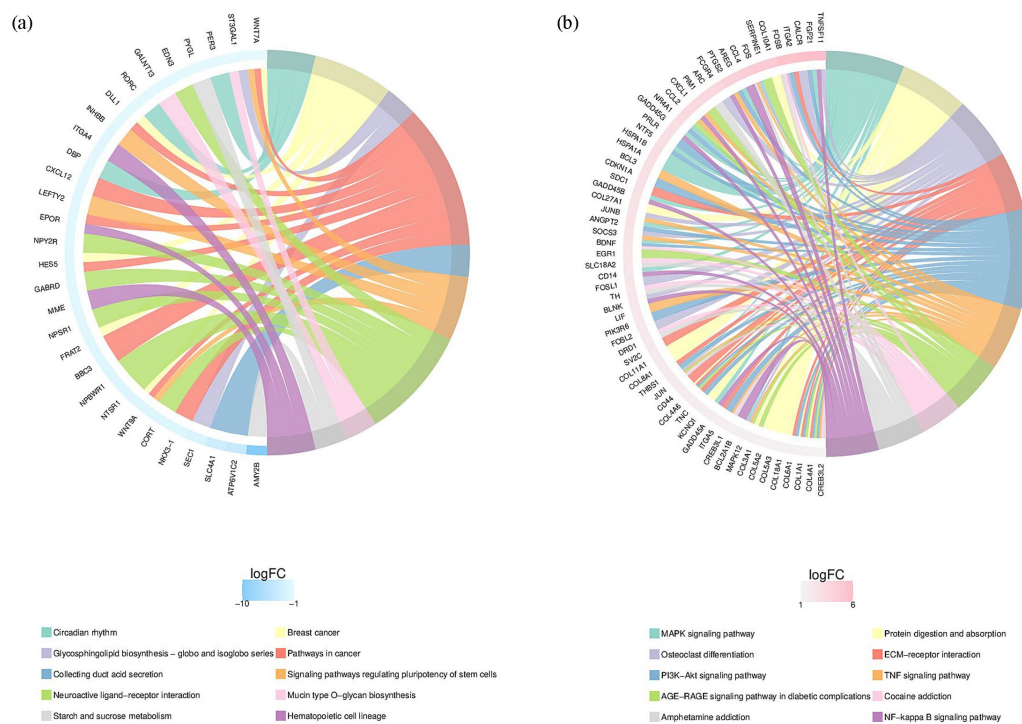

**Figure S2.KEGG chord diagram**

**(a)** KEGG enriched Top10 chords downregulated differential genes. **(b)**KEGG enriched Top10 chords upregulated differential genes.
