# Supplementary material for: Integrating Proteomics and Transcriptomics Reveals the Potential Pathways of Hippocampal Neuron Apoptosis in Dravet Syndrome Model Mice
Source: Int J Mol Sci. 2024 Apr 18;25(8):4457. doi: 10.3390/ijms25084457 (PMC11050081; doi:10.3390/ijms25084457)
Supplement: Supplementary file 1 [file ijms-25-04457-s001.zip]

Archive with 7 entries (7 files):
- supplementary  methods S1.pdf
- supplementary Figures.pdf
- supplementary Table S1.xlsx
- supplementary Table S2.xlsx
- supplementary Table S3.xlsx
- supplementary Table S4.xlsx
- supplementary Table S5.xlsx
