# Supplementary material for: Integrating Proteomics and Transcriptomics Reveals the Potential Pathways of Hippocampal Neuron Apoptosis in Dravet Syndrome Model Mice
Source: Int J Mol Sci. 2024 Apr 18;25(8):4457. doi: 10.3390/ijms25084457 (PMC11050081; doi:10.3390/ijms25084457)
Supplement: Supplementary file 1 [file ijms-25-04457-s001.zip › supplementary Table S1.xlsx]

## Sheet: All Proteins
All Proteins
Accession	Description	Coverage [%]	# Peptides	# PSMs	# Unique Peptides	# AAs	MW [kDa]	calc. pI	Score Sequest HT: Sequest HT	Abundances (Grouped): F1, 126	Abundances (Grouped): F1, 127	Abundances (Grouped): F1, 128	Abundances (Grouped): F1, 129	Abundances (Grouped): F1, 130	Abundances (Grouped): F1, 131
P16546	Spectrin alpha chain, non-erythrocytic 1 OS=Mus musculus OX=10090 GN=Sptan1 PE=1 SV=4	77	211	931	210	2472	284.4	5.33	3302.56	102.5	100.3	99.3	98.9	100.4	98.7
Q9JHU4	Cytoplasmic dynein 1 heavy chain 1 OS=Mus musculus OX=10090 GN=Dync1h1 PE=1 SV=2	42	210	601	210	4644	531.7	6.42	1986.02	99.8	100.6	101.1	99.7	98.6	100.3
Q62261	Spectrin beta chain, non-erythrocytic 1 OS=Mus musculus OX=10090 GN=Sptbn1 PE=1 SV=2	67	172	684	160	2363	274.1	5.58	2289.55	99.7	99.5	99	101.5	100.3	100
Q9QXS1	Plectin OS=Mus musculus OX=10090 GN=Plec PE=1 SV=3	44	208	441	207	4691	533.9	5.96	1396.07	102	96.5	97.9	98.1	106.2	99.3
P20357	Microtubule-associated protein 2 OS=Mus musculus OX=10090 GN=Map2 PE=1 SV=2	58	121	510	121	1828	199	4.91	1692.11	99.6	100.2	101.9	99.8	99.7	98.7
Q8C8R3	Ankyrin-2 OS=Mus musculus OX=10090 GN=Ank2 PE=1 SV=2	46	157	430	144	3898	426	5.17	1495.97	98.7	101	99.6	101.6	97.1	102
Q9QYR6	Microtubule-associated protein 1A OS=Mus musculus OX=10090 GN=Map1a PE=1 SV=2	48	128	411	126	2776	300	5	1381.32	101.7	99.2	98.3	97.2	103.5	100.2
P14873	Microtubule-associated protein 1B OS=Mus musculus OX=10090 GN=Map1b PE=1 SV=2	48	111	417	109	2464	270.1	4.83	1341.54	99.1	101.3	99.6	98.9	100.2	100.9
O88737	Protein bassoon OS=Mus musculus OX=10090 GN=Bsn PE=1 SV=4	41	121	336	116	3942	418.6	7.71	1030.24	102.5	98.3	100.3	98	100.9	100
Q9QYX7	Protein piccolo OS=Mus musculus OX=10090 GN=Pclo PE=1 SV=4	29	132	291	129	5068	550.5	6.51	913.64	99	100.5	99.4	99.8	102	99.2
Q6PIC6	Sodium/potassium-transporting ATPase subunit alpha-3 OS=Mus musculus OX=10090 GN=Atp1a3 PE=1 SV=1	56	69	661	44	1013	111.6	5.41	2318.96	101.5	100.1	97.9	100.7	102.3	97.5
Q68FD5	Clathrin heavy chain 1 OS=Mus musculus OX=10090 GN=Cltc PE=1 SV=3	53	84	383	84	1675	191.4	5.69	1389.7	101.8	100	98.7	102.2	101.1	96.1
Q9QXZ0	Microtubule-actin cross-linking factor 1 OS=Mus musculus OX=10090 GN=Macf1 PE=1 SV=2	21	147	254	142	7354	831.4	5.43	776.49	99.1	98.9	100.4	100.6	101.1	99.9
Q61879	Myosin-10 OS=Mus musculus OX=10090 GN=Myh10 PE=1 SV=2	49	111	267	90	1976	228.9	5.54	880.07	100.3	101.3	100.1	98.7	98.9	100.7
Q6PIE5	Sodium/potassium-transporting ATPase subunit alpha-2 OS=Mus musculus OX=10090 GN=Atp1a2 PE=1 SV=1	56	67	541	41	1020	112.1	5.55	1869.47	102.6	99.9	98.2	101.2	104.8	93.4
Q8VDD5	Myosin-9 OS=Mus musculus OX=10090 GN=Myh9 PE=1 SV=4	45	101	248	80	1960	226.2	5.66	795.34	100.1	101.8	102.2	98.1	97.8	100
Q8BPN8	DmX-like protein 2 OS=Mus musculus OX=10090 GN=Dmxl2 PE=1 SV=3	33	92	235	89	3032	338	6.42	782.1	100.2	99.8	100.5	100	100.7	98.8
Q8VDN2	Sodium/potassium-transporting ATPase subunit alpha-1 OS=Mus musculus OX=10090 GN=Atp1a1 PE=1 SV=1	51	56	427	31	1023	112.9	5.45	1453.48	103.5	99.9	97.8	98.5	102.5	97.8
Q71LX4	Talin-2 OS=Mus musculus OX=10090 GN=Tln2 PE=1 SV=3	41	89	195	71	2375	253.5	5.8	694.49	99.4	99	100.2	100.5	100.6	100.3
Q99104	Unconventional myosin-Va OS=Mus musculus OX=10090 GN=Myo5a PE=1 SV=2	43	96	230	83	1853	215.4	8.63	697.2	99.4	98.9	99.4	101.9	101.5	98.9
P19096	Fatty acid synthase OS=Mus musculus OX=10090 GN=Fasn PE=1 SV=2	35	80	215	80	2504	272.3	6.58	727.24	96.9	100	100.4	99.9	99.4	103.4
P63017	Heat shock cognate 71 kDa protein OS=Mus musculus OX=10090 GN=Hspa8 PE=1 SV=1	72	51	341	35	646	70.8	5.52	1107.27	99.1	103.8	99.8	99.1	97.5	100.7
Q91ZX7	Prolow-density lipoprotein receptor-related protein 1 OS=Mus musculus OX=10090 GN=Lrp1 PE=1 SV=1	22	90	169	88	4545	504.4	5.36	488.61	97.5	102.1	101.4	100.5	96.2	102.3
G5E829	Plasma membrane calcium-transporting ATPase 1 OS=Mus musculus OX=10090 GN=Atp2b1 PE=1 SV=1	41	60	258	37	1220	134.7	5.91	807.68	98.3	105.1	99	98.7	100.2	98.6
E9Q401	Ryanodine receptor 2 OS=Mus musculus OX=10090 GN=Ryr2 PE=1 SV=1	19	89	169	83	4966	564.5	6.09	502.82	103.4	99.5	98.7	96.9	103.2	98.3
P52480	Pyruvate kinase PKM OS=Mus musculus OX=10090 GN=Pkm PE=1 SV=4	73	41	336	41	531	57.8	7.47	1180.57	104.8	97.8	98.1	95.6	106.2	97.6
Q7TSJ2	Microtubule-associated protein 6 OS=Mus musculus OX=10090 GN=Map6 PE=1 SV=2	78	61	247	61	906	96.4	9.5	809.07	103.2	95.3	100.1	102.2	103.1	96.1
P39053	Dynamin-1 OS=Mus musculus OX=10090 GN=Dnm1 PE=1 SV=2	65	66	306	47	867	97.7	7.74	927.26	102.3	99.7	98.4	98.5	101.4	99.7
P46460	Vesicle-fusing ATPase OS=Mus musculus OX=10090 GN=Nsf PE=1 SV=2	49	54	319	53	744	82.6	6.95	943.2	103.9	101	98.4	97.4	99.9	99.4
Q9R0K7	Plasma membrane calcium-transporting ATPase 2 OS=Mus musculus OX=10090 GN=Atp2b2 PE=1 SV=2	46	57	207	38	1198	132.5	5.96	634.32	99.2	102.1	98.2	103.2	100.2	97.1
Q91ZU6	Dystonin OS=Mus musculus OX=10090 GN=Dst PE=1 SV=2	14	100	139	93	7393	833.7	5.31	375.99	99.1	97.5	100.2	98.8	101.9	102.6
P11499	Heat shock protein HSP 90-beta OS=Mus musculus OX=10090 GN=Hsp90ab1 PE=1 SV=3	63	51	268	32	724	83.2	5.03	882.41	94	103.6	103.5	98.3	100.8	99.9
Q3UNH4	G protein-regulated inducer of neurite outgrowth 1 OS=Mus musculus OX=10090 GN=Gprin1 PE=1 SV=2	65	70	200	70	932	95.4	7.93	572.32	100.9	100.6	101.6	101.6	96.8	98.5
Q80TJ1	Calcium-dependent secretion activator 1 OS=Mus musculus OX=10090 GN=Cadps PE=1 SV=3	47	55	158	47	1355	153	5.74	497.89	103	99.4	96.8	97.9	106.1	96.8
Q61316	Heat shock 70 kDa protein 4 OS=Mus musculus OX=10090 GN=Hspa4 PE=1 SV=1	64	47	201	44	841	94.1	5.24	671.3	98.5	101.8	100.5	98.4	101.2	99.5
P12960	Contactin-1 OS=Mus musculus OX=10090 GN=Cntn1 PE=1 SV=1	52	47	216	47	1020	113.3	6.16	732.42	101.2	98.8	99.9	100.7	100.1	99.2
P17710	Hexokinase-1 OS=Mus musculus OX=10090 GN=Hk1 PE=1 SV=3	50	52	251	48	974	108.2	6.8	815.3	102	99.8	99.5	99.1	102.1	97.4
Q7TMM9	Tubulin beta-2A chain OS=Mus musculus OX=10090 GN=Tubb2a PE=1 SV=1	68	25	775	2	445	49.9	4.89	2005.96	96.3	101.6	99.1	101.1	99	102.9
P15508	Spectrin beta chain, erythrocytic OS=Mus musculus OX=10090 GN=Sptb PE=1 SV=4	36	74	151	65	2128	245.1	5.33	476.23	101	99	96.3	97.5	106.7	99.5
Q6ZWR6	Nesprin-1 OS=Mus musculus OX=10090 GN=Syne1 PE=1 SV=2	12	96	132	95	8799	1009.3	5.59	324.44	96.6	97.9	97	102	103.2	103.4
Q9CWF2	Tubulin beta-2B chain OS=Mus musculus OX=10090 GN=Tubb2b PE=1 SV=1	68	25	770	2	445	49.9	4.89	1973.19	91.7	110	95.4	104.8	91.8	106.4
O08788	Dynactin subunit 1 OS=Mus musculus OX=10090 GN=Dctn1 PE=1 SV=3	48	51	139	51	1281	141.6	5.9	510.71	102.8	99.7	99.6	99.1	97.1	101.7
P13595	Neural cell adhesion molecule 1 OS=Mus musculus OX=10090 GN=Ncam1 PE=1 SV=3	43	50	247	50	1115	119.4	4.83	761.22	98	99.5	102.6	102.7	97.4	99.8
P60710	Actin, cytoplasmic 1 OS=Mus musculus OX=10090 GN=Actb PE=1 SV=1	68	31	692	10	375	41.7	5.48	2666.07	98.1	102.4	97.5	101.5	100.7	99.8
Q91XV3	Brain acid soluble protein 1 OS=Mus musculus OX=10090 GN=Basp1 PE=1 SV=3	96	36	400	36	226	22.1	4.51	1413.15	99.3	99.5	100.3	99.1	100.5	101.2
Q01853	Transitional endoplasmic reticulum ATPase OS=Mus musculus OX=10090 GN=Vcp PE=1 SV=4	66	50	201	50	806	89.3	5.26	675.09	98	101.8	100.2	99.5	98.5	102
Q9QWI6	SRC kinase signaling inhibitor 1 OS=Mus musculus OX=10090 GN=Srcin1 PE=1 SV=2	54	66	145	66	1250	134.8	9.32	473.87	100.9	98.4	99.1	101.5	101.6	98.4
P07901	Heat shock protein HSP 90-alpha OS=Mus musculus OX=10090 GN=Hsp90aa1 PE=1 SV=4	51	44	265	27	733	84.7	5.01	828.9	97.9	101.6	101.5	98.6	101.2	99.2
Q7TPR4	Alpha-actinin-1 OS=Mus musculus OX=10090 GN=Actn1 PE=1 SV=1	54	45	148	26	892	103	5.38	512.95	102.9	101.8	98.8	96.5	102.2	97.8
O55143	Sarcoplasmic/endoplasmic reticulum calcium ATPase 2 OS=Mus musculus OX=10090 GN=Atp2a2 PE=1 SV=2	44	46	191	37	1044	114.8	5.34	643.14	100	103.1	101.6	99.8	97.4	98.1
P17182	Alpha-enolase OS=Mus musculus OX=10090 GN=Eno1 PE=1 SV=3	79	35	273	29	434	47.1	6.8	980.63	103.4	99.5	98.4	97.2	102.8	98.7
P56480	ATP synthase subunit beta, mitochondrial OS=Mus musculus OX=10090 GN=Atp5f1b PE=1 SV=2	77	29	262	29	529	56.3	5.34	890.71	100	99.2	100.1	101.3	99.4	100.1
P70336	Rho-associated protein kinase 2 OS=Mus musculus OX=10090 GN=Rock2 PE=1 SV=1	44	70	155	64	1388	160.5	5.99	486.7	100.4	99.8	98.7	98.7	101.7	100.7
O08553	Dihydropyrimidinase-related protein 2 OS=Mus musculus OX=10090 GN=Dpysl2 PE=1 SV=2	70	31	370	26	572	62.2	6.38	1495.27	101.2	97.9	98.7	99.8	103	99.4
Q8CHC4	Synaptojanin-1 OS=Mus musculus OX=10090 GN=Synj1 PE=1 SV=3	36	53	183	52	1574	172.5	6.89	671.25	101.5	97.4	98.7	98.6	103.9	99.9
F6SEU4	Ras/Rap GTPase-activating protein SynGAP OS=Mus musculus OX=10090 GN=Syngap1 PE=1 SV=2	46	58	159	52	1340	148.1	8.98	506.67	101.3	101.7	98	98.9	102.4	97.7
O08599	Syntaxin-binding protein 1 OS=Mus musculus OX=10090 GN=Stxbp1 PE=1 SV=2	63	45	240	44	594	67.5	6.96	748.22	102.8	96.4	96.4	100.4	105.8	98.2
P57780	Alpha-actinin-4 OS=Mus musculus OX=10090 GN=Actn4 PE=1 SV=1	50	45	139	30	912	104.9	5.41	452.43	100.9	100.7	100.1	98.7	100	99.6
Q9JMH9	Unconventional myosin-XVIIIa OS=Mus musculus OX=10090 GN=Myo18a PE=1 SV=2	32	67	151	67	2050	232.6	6.28	490.38	98.7	99.2	101.2	101.1	98.2	101.5
Q99KI0	Aconitate hydratase, mitochondrial OS=Mus musculus OX=10090 GN=Aco2 PE=1 SV=1	56	43	227	43	780	85.4	7.93	745.76	102.5	99.3	98.5	98.1	103.5	98.1
P68372	Tubulin beta-4B chain OS=Mus musculus OX=10090 GN=Tubb4b PE=1 SV=1	74	26	691	2	445	49.8	4.89	1673.38	98.5	101.9	96.9	101	101.1	100.6
O88935	Synapsin-1 OS=Mus musculus OX=10090 GN=Syn1 PE=1 SV=2	51	28	302	26	706	74.1	9.8	1058.29	102.9	96.9	97.1	99.3	107.7	96.2
Q8CAQ8	MICOS complex subunit Mic60 OS=Mus musculus OX=10090 GN=Immt PE=1 SV=1	69	52	163	52	757	83.8	6.61	553.09	100.8	100.9	99.3	100.1	99.9	98.9
P50516	V-type proton ATPase catalytic subunit A OS=Mus musculus OX=10090 GN=Atp6v1a PE=1 SV=2	58	40	248	40	617	68.3	5.58	798.73	102.3	99.1	99.2	98.5	102.7	98.3
Q80YX1	Tenascin OS=Mus musculus OX=10090 GN=Tnc PE=1 SV=1	33	56	142	56	2110	231.7	4.89	475.67	96	104.8	105	99.3	94.8	100.1
P68369	Tubulin alpha-1A chain OS=Mus musculus OX=10090 GN=Tuba1a PE=1 SV=1	62	28	724	6	451	50.1	5.06	2942.82	93.5	101	99.4	102.5	103.9	99.8
Q8CI94	Glycogen phosphorylase, brain form OS=Mus musculus OX=10090 GN=Pygb PE=1 SV=3	54	50	154	39	843	96.7	6.73	529.49	104.9	99.8	99.3	95.8	103.4	96.7
Q3UHJ0	AP2-associated protein kinase 1 OS=Mus musculus OX=10090 GN=Aak1 PE=1 SV=2	60	39	129	38	959	103.3	6.7	458.53	101.1	97.7	99.5	99.8	100.7	101.3
P07724	Albumin OS=Mus musculus OX=10090 GN=Alb PE=1 SV=3	70	45	203	45	608	68.6	6.07	687.8	117.2	94.1	97	98.3	94.9	98.6
P23819	Glutamate receptor 2 OS=Mus musculus OX=10090 GN=Gria2 PE=1 SV=3	45	44	136	37	883	98.6	7.39	458.19	100	105.3	101.1	96.5	98.3	98.8
P68368	Tubulin alpha-4A chain OS=Mus musculus OX=10090 GN=Tuba4a PE=1 SV=1	61	29	699	8	448	49.9	5.06	2873.97	98.5	101.4	99.1	99.8	101.9	99.3
Q8BRT1	CLIP-associating protein 2 OS=Mus musculus OX=10090 GN=Clasp2 PE=1 SV=1	45	55	146	49	1286	140.7	8.63	480.1	97.5	99	101.7	100.6	99.9	101.2
Q03265	ATP synthase subunit alpha, mitochondrial OS=Mus musculus OX=10090 GN=Atp5f1a PE=1 SV=1	59	40	345	40	553	59.7	9.19	1133.12	101.7	101.8	98.2	100.5	99.8	98
P17427	AP-2 complex subunit alpha-2 OS=Mus musculus OX=10090 GN=Ap2a2 PE=1 SV=2	45	47	201	28	938	104	6.93	578.87	100.7	99.7	98.9	98.7	103.7	98.3
P17426	AP-2 complex subunit alpha-1 OS=Mus musculus OX=10090 GN=Ap2a1 PE=1 SV=1	49	54	220	35	977	107.6	7.03	610.96	102	100.3	98.5	101.1	102.4	95.7
Q6PB66	Leucine-rich PPR motif-containing protein, mitochondrial OS=Mus musculus OX=10090 GN=Lrpprc PE=1 SV=2	40	59	126	59	1392	156.5	6.83	433.2	97.3	102.3	102.4	101.4	95.8	100.8
G5E8K5	Ankyrin-3 OS=Mus musculus OX=10090 GN=Ank3 PE=1 SV=1	31	63	120	51	1961	213.9	6.7	381.02	103.6	96.9	97.5	96.6	101.9	103.5
Q80UG2	Plexin-A4 OS=Mus musculus OX=10090 GN=Plxna4 PE=1 SV=3	35	62	126	45	1893	212.4	6.83	409.01	98.7	101	100.7	100.1	98.8	100.8
Q02053	Ubiquitin-like modifier-activating enzyme 1 OS=Mus musculus OX=10090 GN=Uba1 PE=1 SV=1	46	43	158	43	1058	117.7	5.66	557.86	100.3	101.1	98.8	100.3	101.1	98.3
P38647	Stress-70 protein, mitochondrial OS=Mus musculus OX=10090 GN=Hspa9 PE=1 SV=3	50	43	142	42	679	73.4	6.07	451.98	100.3	100.1	100.6	99.4	99.9	99.7
Q8BL66	Early endosome antigen 1 OS=Mus musculus OX=10090 GN=Eea1 PE=1 SV=2	44	67	122	66	1411	160.8	5.77	391.38	98.6	98.5	101	101.2	99.7	101
Q64727	Vinculin OS=Mus musculus OX=10090 GN=Vcl PE=1 SV=4	57	59	127	59	1066	116.6	6	388.88	100.9	100.9	102.4	101.4	96.8	97.6
Q9DBG3	AP-2 complex subunit beta OS=Mus musculus OX=10090 GN=Ap2b1 PE=1 SV=1	41	43	167	21	937	104.5	5.38	564.08	101.6	100.2	99.6	102.1	100.3	96.2
P48722	Heat shock 70 kDa protein 4L OS=Mus musculus OX=10090 GN=Hspa4l PE=1 SV=2	50	46	157	44	838	94.3	5.74	480.19	101.1	97.2	99.9	99.9	104.4	97.4
Q9EPN1	Neurobeachin OS=Mus musculus OX=10090 GN=Nbea PE=1 SV=1	24	61	132	56	2936	326.5	6.2	444.46	98.3	102.7	100.3	100.9	98.1	99.6
P26039	Talin-1 OS=Mus musculus OX=10090 GN=Tln1 PE=1 SV=2	27	64	121	46	2541	269.7	6.18	363.04	101.3	97.8	100.4	100	98.7	101.8
Q9WV92	Band 4.1-like protein 3 OS=Mus musculus OX=10090 GN=Epb41l3 PE=1 SV=1	52	47	122	43	929	103.3	5.31	454.48	102.5	94.7	98.6	101.3	104.3	98.6
Q61699	Heat shock protein 105 kDa OS=Mus musculus OX=10090 GN=Hsph1 PE=1 SV=2	52	43	137	40	858	96.3	5.53	502.17	93.2	104.2	103.6	98.1	99.6	101.4
P16330	2',3'-cyclic-nucleotide 3'-phosphodiesterase OS=Mus musculus OX=10090 GN=Cnp PE=1 SV=3	74	41	214	39	420	47.1	8.97	745.14	123.2	83.3	87.4	85.6	113.5	107
A2AGT5	Cytoskeleton-associated protein 5 OS=Mus musculus OX=10090 GN=Ckap5 PE=1 SV=1	30	60	112	60	2032	225.5	7.96	356.81	101	98.9	99	100.4	98.9	101.8
P09411	Phosphoglycerate kinase 1 OS=Mus musculus OX=10090 GN=Pgk1 PE=1 SV=4	82	36	176	36	417	44.5	7.9	606.53	104.2	100.1	97.3	98.8	100.6	99
P99024	Tubulin beta-5 chain OS=Mus musculus OX=10090 GN=Tubb5 PE=1 SV=1	64	23	707	3	444	49.6	4.89	1765.83	95.9	101.3	99.2	99.6	100.4	103.5
P58252	Elongation factor 2 OS=Mus musculus OX=10090 GN=Eef2 PE=1 SV=2	49	46	196	45	858	95.3	6.83	569.66	96.4	104	102.9	100.5	96	100.2
P05064	Fructose-bisphosphate aldolase A OS=Mus musculus OX=10090 GN=Aldoa PE=1 SV=2	76	33	254	28	364	39.3	8.09	896.43	104.7	99.7	97.4	97.5	101.1	99.6
Q8BYI9	Tenascin-R OS=Mus musculus OX=10090 GN=Tnr PE=1 SV=2	36	41	143	41	1358	149.5	4.94	536.92	105.9	95.7	97.7	95	107.6	98.2
Q91VD9	NADH-ubiquinone oxidoreductase 75 kDa subunit, mitochondrial OS=Mus musculus OX=10090 GN=Ndufs1 PE=1 SV=2	59	38	162	38	727	79.7	5.72	535.25	101.8	99.2	97.4	100.9	101.7	99
Q64521	Glycerol-3-phosphate dehydrogenase, mitochondrial OS=Mus musculus OX=10090 GN=Gpd2 PE=1 SV=2	63	46	151	46	727	80.9	6.61	442.18	99.2	100.3	97.1	102.5	98.4	102.5
P16858	Glyceraldehyde-3-phosphate dehydrogenase OS=Mus musculus OX=10090 GN=Gapdh PE=1 SV=2	68	21	311	21	333	35.8	8.25	1082.2	104.7	100.9	96.4	98.3	101.4	98.3
P63038	60 kDa heat shock protein, mitochondrial OS=Mus musculus OX=10090 GN=Hspd1 PE=1 SV=1	76	41	172	41	573	60.9	6.18	615.82	98.9	100.4	98.9	99.2	102.5	100
Q61768	Kinesin-1 heavy chain OS=Mus musculus OX=10090 GN=Kif5b PE=1 SV=3	50	51	118	40	963	109.5	6.44	385.94	100.1	99.4	99.8	98.9	98.9	102.9
P60469	Liprin-alpha-3 OS=Mus musculus OX=10090 GN=Ppfia3 PE=1 SV=2	45	57	116	52	1194	133.3	5.64	371.11	99	101.4	99.1	101	98.5	101
P08553	Neurofilament medium polypeptide OS=Mus musculus OX=10090 GN=Nefm PE=1 SV=4	47	48	175	43	848	95.9	4.77	515.04	115.2	89.5	92.1	94.6	106.5	102.1
Q9Z0R4	Intersectin-1 OS=Mus musculus OX=10090 GN=Itsn1 PE=1 SV=2	32	56	115	52	1714	194.2	7.91	347.55	99.5	99.3	100.5	99.7	99.3	101.8
Q9D6F9	Tubulin beta-4A chain OS=Mus musculus OX=10090 GN=Tubb4a PE=1 SV=3	74	24	570	6	444	49.6	4.88	1277.68	106.9	95.2	93.4	94.8	107.6	102.2
Q8CGC7	Bifunctional glutamate/proline--tRNA ligase OS=Mus musculus OX=10090 GN=Eprs1 PE=1 SV=4	39	59	129	56	1512	170	7.66	376.06	100.3	100.8	101.8	99.8	96.1	101.2
P28738	Kinesin heavy chain isoform 5C OS=Mus musculus OX=10090 GN=Kif5c PE=1 SV=3	49	50	136	34	956	109.2	6.19	428.01	98.2	99	99.1	102.4	96.9	104.5
Q9QXS6	Drebrin OS=Mus musculus OX=10090 GN=Dbn1 PE=1 SV=4	49	31	123	31	706	77.2	4.49	433.47	98.1	103.3	100.2	99.2	99.4	99.8
P11881	Inositol 1,4,5-trisphosphate receptor type 1 OS=Mus musculus OX=10090 GN=Itpr1 PE=1 SV=2	22	59	93	48	2749	313	6.04	287.19	96.8	100.3	100.2	96.8	106.4	99.4
Q64332	Synapsin-2 OS=Mus musculus OX=10090 GN=Syn2 PE=1 SV=2	54	27	213	24	586	63.3	8.43	766.76	104	98.9	98.7	96.4	104.4	97.6
Q922J3	CAP-Gly domain-containing linker protein 1 OS=Mus musculus OX=10090 GN=Clip1 PE=1 SV=1	39	53	99	46	1391	155.7	5.24	292.36	96.3	101.7	101.8	98.2	100.3	101.8
P20029	Endoplasmic reticulum chaperone BiP OS=Mus musculus OX=10090 GN=Hspa5 PE=1 SV=3	57	42	143	40	655	72.4	5.16	498.49	97.1	104.7	103.8	98.9	95	100.6
Q61598	Rab GDP dissociation inhibitor beta OS=Mus musculus OX=10090 GN=Gdi2 PE=1 SV=1	68	33	134	25	445	50.5	6.25	480.17	98.9	100.2	100.4	101.4	100.1	99
Q60597	2-oxoglutarate dehydrogenase, mitochondrial OS=Mus musculus OX=10090 GN=Ogdh PE=1 SV=3	40	38	108	38	1023	116.4	6.83	365.48	98.8	99.2	100.4	100.6	102.5	98.5
P58281	Dynamin-like 120 kDa protein, mitochondrial OS=Mus musculus OX=10090 GN=Opa1 PE=1 SV=1	50	50	127	50	960	111.3	7.55	434.69	98.9	99.1	100.9	100.1	100.4	100.5
Q99PL5	Ribosome-binding protein 1 OS=Mus musculus OX=10090 GN=Rrbp1 PE=1 SV=2	57	63	116	63	1605	172.8	9.33	290.25	94.2	102.6	101.3	104.2	97.2	100.4
P17156	Heat shock-related 70 kDa protein 2 OS=Mus musculus OX=10090 GN=Hspa2 PE=1 SV=2	57	43	163	26	633	69.6	5.67	489.6	104.9	100.4	99.7	94.2	101.4	99.5
P27546	Microtubule-associated protein 4 OS=Mus musculus OX=10090 GN=Map4 PE=1 SV=3	48	47	115	46	1125	117.4	4.98	321.47	99.9	104.6	98.8	97.3	94.6	104.7
P70398	Probable ubiquitin carboxyl-terminal hydrolase FAF-X OS=Mus musculus OX=10090 GN=Usp9x PE=1 SV=2	22	53	92	53	2559	290.5	5.87	312.09	96.9	99.4	102.2	99.7	100.3	101.5
Q4KMM3	Oxidation resistance protein 1 OS=Mus musculus OX=10090 GN=Oxr1 PE=1 SV=3	49	38	114	38	866	95.9	5.33	419.66	102.9	97.1	98.8	99.3	105.1	96.7
Q6PH08	ERC protein 2 OS=Mus musculus OX=10090 GN=Erc2 PE=1 SV=2	49	61	135	45	957	110.6	7.03	364.14	101.9	101.1	101	96.3	100.4	99.3
D3YZU1	SH3 and multiple ankyrin repeat domains protein 1 OS=Mus musculus OX=10090 GN=Shank1 PE=1 SV=1	27	49	114	47	2167	226.2	8.34	324.06	100.4	99.8	100.1	96.9	104.6	98.3
Q62188	Dihydropyrimidinase-related protein 3 OS=Mus musculus OX=10090 GN=Dpysl3 PE=1 SV=1	59	26	136	21	570	61.9	6.49	532.92	91.8	104.4	102.7	104.8	93.5	102.7
A2AN08	E3 ubiquitin-protein ligase UBR4 OS=Mus musculus OX=10090 GN=Ubr4 PE=1 SV=1	13	64	93	64	5180	571.9	6.06	264.65	96.1	101	100.5	100.5	99.5	102.4
Q9Z1G4	V-type proton ATPase 116 kDa subunit a1 OS=Mus musculus OX=10090 GN=Atp6v0a1 PE=1 SV=3	36	33	116	32	839	96.4	6.76	440.89	101.7	100.2	98.8	99.2	102.7	97.3
Q80Z38	SH3 and multiple ankyrin repeat domains protein 2 OS=Mus musculus OX=10090 GN=Shank2 PE=1 SV=2	42	53	99	51	1476	158.9	7.18	352.46	99	100.9	98.9	100.1	101.2	100
Q61301	Catenin alpha-2 OS=Mus musculus OX=10090 GN=Ctnna2 PE=1 SV=3	46	37	105	29	953	105.2	5.71	401.38	99.8	101.2	100	100.7	99	99.3
Q60864	Stress-induced-phosphoprotein 1 OS=Mus musculus OX=10090 GN=Stip1 PE=1 SV=1	66	47	133	47	543	62.5	6.8	400.51	97.9	99.9	101.7	98.1	103.5	98.8
P60879	Synaptosomal-associated protein 25 OS=Mus musculus OX=10090 GN=Snap25 PE=1 SV=1	84	23	214	22	206	23.3	4.77	766.08	98.9	102.2	99.9	98.3	97	103.6
Q8K1M6	Dynamin-1-like protein OS=Mus musculus OX=10090 GN=Dnm1l PE=1 SV=2	59	43	146	43	742	82.6	7.05	483.67	99.2	99.6	101.5	101.7	99.8	98.2
Q9ERD7	Tubulin beta-3 chain OS=Mus musculus OX=10090 GN=Tubb3 PE=1 SV=1	72	24	545	10	450	50.4	4.93	1196.83	98.1	101.5	99.3	104.9	97.4	98.9
P17183	Gamma-enolase OS=Mus musculus OX=10090 GN=Eno2 PE=1 SV=2	75	25	178	19	434	47.3	5.11	643.63	102.5	99.5	96.8	99.8	103.1	98.3
O35643	AP-1 complex subunit beta-1 OS=Mus musculus OX=10090 GN=Ap1b1 PE=1 SV=2	40	39	136	17	943	103.9	5.17	438.18	102.8	98.6	97.3	98.7	104.6	98
A2CG49	Kalirin OS=Mus musculus OX=10090 GN=Kalrn PE=1 SV=1	21	62	100	52	2964	336.8	6.07	286.99	98.1	103.3	98.7	99.5	100	100.4
P47857	ATP-dependent 6-phosphofructokinase, muscle type OS=Mus musculus OX=10090 GN=Pfkm PE=1 SV=3	43	33	132	29	780	85.2	8	463.58	101.5	99.2	99.1	100.2	101.8	98.2
Q91XM9	Disks large homolog 2 OS=Mus musculus OX=10090 GN=Dlg2 PE=1 SV=2	43	38	106	32	852	94.8	6.24	390.04	100.9	99.2	99.8	99.1	103.3	97.7
Q8VEK3	Heterogeneous nuclear ribonucleoprotein U OS=Mus musculus OX=10090 GN=Hnrnpu PE=1 SV=1	51	46	132	46	800	87.9	6.24	354.5	99.6	105.1	100.5	102.3	92.7	99.8
Q9Z1B3	1-phosphatidylinositol 4,5-bisphosphate phosphodiesterase beta-1 OS=Mus musculus OX=10090 GN=Plcb1 PE=1 SV=2	33	48	121	48	1216	138.3	6.13	410.51	101.8	99	98.4	99	103.8	98.1
Q6Q477	Plasma membrane calcium-transporting ATPase 4 OS=Mus musculus OX=10090 GN=Atp2b4 PE=1 SV=1	27	37	128	19	1205	133	6.13	399.69	98.8	92.8	102.4	106.7	107.6	91.8
P08249	Malate dehydrogenase, mitochondrial OS=Mus musculus OX=10090 GN=Mdh2 PE=1 SV=3	72	25	231	25	338	35.6	8.68	846.96	101.4	100.9	99.1	99.4	102.5	96.7
P97427	Dihydropyrimidinase-related protein 1 OS=Mus musculus OX=10090 GN=Crmp1 PE=1 SV=1	51	25	156	20	572	62.1	7.12	551.84	97.6	102.8	101.7	100.9	95.4	101.6
Q9ES97	Reticulon-3 OS=Mus musculus OX=10090 GN=Rtn3 PE=1 SV=2	46	40	113	39	964	103.8	4.92	383.28	100.6	100.5	100.3	99.8	98.4	100.4
E9Q3L2	Phosphatidylinositol 4-kinase alpha OS=Mus musculus OX=10090 GN=Pi4ka PE=1 SV=2	23	45	86	45	2105	236.9	7.06	274.03	101.1	98.4	100.4	99.7	100.5	99.9
Q9QVP9	Protein-tyrosine kinase 2-beta OS=Mus musculus OX=10090 GN=Ptk2b PE=1 SV=2	44	44	112	43	1009	115.7	6.35	360.17	99	102.5	100.2	96.7	98.8	102.8
P23116	Eukaryotic translation initiation factor 3 subunit A OS=Mus musculus OX=10090 GN=Eif3a PE=1 SV=5	39	61	116	61	1344	161.8	6.77	278.12	97.2	101.3	101.4	101.4	96.4	102.2
P05063	Fructose-bisphosphate aldolase C OS=Mus musculus OX=10090 GN=Aldoc PE=1 SV=4	76	29	172	24	363	39.4	7.12	656.44	100.2	98.9	100	101.4	102	97.5
P62259	14-3-3 protein epsilon OS=Mus musculus OX=10090 GN=Ywhae PE=1 SV=1	79	28	258	25	255	29.2	4.74	802.56	99.9	103.3	100.3	101.7	96.3	98.5
Q5SQX6	Cytoplasmic FMR1-interacting protein 2 OS=Mus musculus OX=10090 GN=Cyfip2 PE=1 SV=2	35	44	128	28	1253	145.6	7.05	372.98	98.8	103.4	98.6	99.4	98.6	101.2
P63318	Protein kinase C gamma type OS=Mus musculus OX=10090 GN=Prkcg PE=1 SV=1	47	35	145	32	697	78.3	7.46	486.84	99	103.9	98.7	98.9	98.9	100.5
F6ZDS4	Nucleoprotein TPR OS=Mus musculus OX=10090 GN=Tpr PE=1 SV=1	25	55	80	54	2431	273.8	5.03	235.53	99.2	99.3	101	101.3	99.6	99.7
P50396	Rab GDP dissociation inhibitor alpha OS=Mus musculus OX=10090 GN=Gdi1 PE=1 SV=3	51	26	197	18	447	50.5	5.08	689.23	100.2	100.1	99.2	100.4	98.9	101.2
P58871	182 kDa tankyrase-1-binding protein OS=Mus musculus OX=10090 GN=Tnks1bp1 PE=1 SV=2	33	44	89	44	1720	181.7	4.88	285.42	99.3	99.6	100.7	96.4	101.4	102.5
Q6P9K8	Caskin-1 OS=Mus musculus OX=10090 GN=Caskin1 PE=1 SV=2	38	40	100	38	1431	150.4	9.17	346.85	99.6	97.8	100.3	101	101.6	99.6
Q9Z0H8	CAP-Gly domain-containing linker protein 2 OS=Mus musculus OX=10090 GN=Clip2 PE=1 SV=2	44	47	104	39	1047	115.8	6.48	360.46	97.2	98.4	100.7	98.8	102.3	102.6
P26443	Glutamate dehydrogenase 1, mitochondrial OS=Mus musculus OX=10090 GN=Glud1 PE=1 SV=1	51	30	188	30	558	61.3	8	644.81	104.8	98	99.4	99.9	99.5	98.4
P70206	Plexin-A1 OS=Mus musculus OX=10090 GN=Plxna1 PE=1 SV=1	27	47	90	34	1894	211	6.9	298.34	97.8	101.8	102.3	99.3	96.8	101.8
P63101	14-3-3 protein zeta/delta OS=Mus musculus OX=10090 GN=Ywhaz PE=1 SV=1	80	27	309	18	245	27.8	4.79	988.03	99.3	102.3	97.6	103.7	99.2	97.9
P28660	Nck-associated protein 1 OS=Mus musculus OX=10090 GN=Nckap1 PE=1 SV=2	34	42	112	40	1128	128.7	6.62	332.6	98.8	103.1	98.9	98.8	100.3	100.2
Q8C0T5	Signal-induced proliferation-associated 1-like protein 1 OS=Mus musculus OX=10090 GN=Sipa1l1 PE=1 SV=2	31	46	85	44	1782	196.9	8.13	260.79	98.5	100.2	99.8	100	99.1	102.3
Q6R891	Neurabin-2 OS=Mus musculus OX=10090 GN=Ppp1r9b PE=1 SV=1	42	33	100	33	817	89.5	4.92	373.96	98.8	101.3	101.6	98.1	99.2	101
P62814	V-type proton ATPase subunit B, brain isoform OS=Mus musculus OX=10090 GN=Atp6v1b2 PE=1 SV=1	62	28	139	28	511	56.5	5.81	525.34	101.1	99.3	97.9	100	100.8	100.9
P42932	T-complex protein 1 subunit theta OS=Mus musculus OX=10090 GN=Cct8 PE=1 SV=3	57	33	121	33	548	59.5	5.62	393.95	98.1	101.8	102.5	99.3	96.7	101.5
B0V2N1	Receptor-type tyrosine-protein phosphatase S OS=Mus musculus OX=10090 GN=Ptprs PE=1 SV=1	22	35	88	29	1907	211.8	7.23	338.35	96.9	100.8	100.6	99.1	99.9	102.7
P14094	Sodium/potassium-transporting ATPase subunit beta-1 OS=Mus musculus OX=10090 GN=Atp1b1 PE=1 SV=1	51	25	179	25	304	35.2	8.65	573.06	101.6	100	97.4	99.9	103.3	97.7
Q8R0S2	IQ motif and SEC7 domain-containing protein 1 OS=Mus musculus OX=10090 GN=Iqsec1 PE=1 SV=2	42	40	84	33	961	107.9	7.14	275.02	102.9	102.3	99	98	99.9	97.9
P28652	Calcium/calmodulin-dependent protein kinase type II subunit beta OS=Mus musculus OX=10090 GN=Camk2b PE=1 SV=2	54	25	162	17	542	60.4	7.28	541.23	97.5	105.2	93.5	102.3	98.2	103.3
P27773	Protein disulfide-isomerase A3 OS=Mus musculus OX=10090 GN=Pdia3 PE=1 SV=2	68	40	114	40	505	56.6	6.21	387.67	98.3	103.7	103.4	98.9	93.4	102.3
P06837	Neuromodulin OS=Mus musculus OX=10090 GN=Gap43 PE=1 SV=1	86	26	251	25	227	23.6	4.73	770.87	95.4	99.6	103.3	104.4	94.5	102.9
O70318	Band 4.1-like protein 2 OS=Mus musculus OX=10090 GN=Epb41l2 PE=1 SV=2	35	37	104	34	988	109.9	5.43	337.04	104.2	96.1	100.2	98.2	102.4	99.1
Q7TMY8	E3 ubiquitin-protein ligase HUWE1 OS=Mus musculus OX=10090 GN=Huwe1 PE=1 SV=5	13	54	103	54	4377	482.3	5.22	278.49	97.9	100.3	99.1	100.2	98.4	104.1
Q9WUA3	ATP-dependent 6-phosphofructokinase, platelet type OS=Mus musculus OX=10090 GN=Pfkp PE=1 SV=1	41	35	136	30	784	85.4	7.11	374.41	99.1	99.7	100	101.4	100	99.8
P06745	Glucose-6-phosphate isomerase OS=Mus musculus OX=10090 GN=Gpi PE=1 SV=4	40	29	147	29	558	62.7	8.13	460.78	105.5	101.8	97.9	98.9	100	95.8
Q80TE7	Leucine-rich repeat-containing protein 7 OS=Mus musculus OX=10090 GN=Lrrc7 PE=1 SV=2	35	45	96	43	1490	166.8	6.61	276.73	99.9	103.1	99.4	97	99.6	101.1
Q8BKX1	Brain-specific angiogenesis inhibitor 1-associated protein 2 OS=Mus musculus OX=10090 GN=Baiap2 PE=1 SV=2	73	37	110	37	535	59.2	9.04	351.71	100.4	103.3	99.7	97.5	100.3	98.7
P08551	Neurofilament light polypeptide OS=Mus musculus OX=10090 GN=Nefl PE=1 SV=5	52	33	129	29	543	61.5	4.64	389.59	115	89.3	92.2	93.6	107.4	102.5
Q8R0Y6	Cytosolic 10-formyltetrahydrofolate dehydrogenase OS=Mus musculus OX=10090 GN=Aldh1l1 PE=1 SV=1	49	39	89	37	902	98.6	5.91	313.33	101.3	96.3	101.8	100.8	102	97.9
D3Z7P3	Glutaminase kidney isoform, mitochondrial OS=Mus musculus OX=10090 GN=Gls PE=1 SV=1	46	29	131	28	674	73.9	7.99	448.02	103.3	99.4	99.2	100.8	98.6	98.7
P14824	Annexin A6 OS=Mus musculus OX=10090 GN=Anxa6 PE=1 SV=3	60	42	91	40	673	75.8	5.5	293.43	99.5	101.9	99.8	99.4	101.1	98.3
Q9JME5	AP-3 complex subunit beta-2 OS=Mus musculus OX=10090 GN=Ap3b2 PE=1 SV=2	39	41	95	34	1082	119.1	5.63	272.95	97.9	100.4	101	101.6	98.8	100.2
Q8BH59	Calcium-binding mitochondrial carrier protein Aralar1 OS=Mus musculus OX=10090 GN=Slc25a12 PE=1 SV=1	50	31	102	27	677	74.5	8.25	360.61	101.8	99.2	99.2	97.3	107.2	95.3
P08113	Endoplasmin OS=Mus musculus OX=10090 GN=Hsp90b1 PE=1 SV=2	38	35	126	33	802	92.4	4.82	420.7	94.9	102.2	104.6	102.3	95	100.9
Q80U49	Centrosomal protein of 170 kDa protein B OS=Mus musculus OX=10090 GN=Cep170b PE=1 SV=2	34	51	91	50	1574	170.7	6.87	254.39	98.3	97.8	99.3	100.9	101.2	102.5
Q920I9	WD repeat-containing protein 7 OS=Mus musculus OX=10090 GN=Wdr7 PE=1 SV=3	30	40	112	40	1489	163.3	6.9	361.51	99.5	99.5	99.5	99.5	101.7	100.3
P70704	Phospholipid-transporting ATPase IA OS=Mus musculus OX=10090 GN=Atp8a1 PE=1 SV=2	27	32	102	31	1164	131.3	6.84	362.31	101	100.1	98.3	97.4	103.7	99.5
Q810U3	Neurofascin OS=Mus musculus OX=10090 GN=Nfasc PE=1 SV=1	30	38	87	37	1240	137.9	6.19	310.32	105.9	97.6	97.7	96.9	104.3	97.6
Q99PV0	Pre-mRNA-processing-splicing factor 8 OS=Mus musculus OX=10090 GN=Prpf8 PE=1 SV=2	19	47	83	47	2335	273.4	8.84	239.62	96.9	100.8	102.4	101.6	97.8	100.4
P47708	Rabphilin-3A OS=Mus musculus OX=10090 GN=Rph3a PE=1 SV=2	55	38	88	36	681	75.4	8.27	295.83	102.3	104.1	96.3	99.2	99.6	98.6
O54988	STE20-like serine/threonine-protein kinase OS=Mus musculus OX=10090 GN=Slk PE=1 SV=2	40	44	96	43	1233	141.4	5.14	270.62	99.2	99.7	99.6	98.3	101.3	101.9
Q8K0U4	Heat shock 70 kDa protein 12A OS=Mus musculus OX=10090 GN=Hspa12a PE=1 SV=1	42	28	116	26	675	74.8	6.77	392.19	108.2	97.5	98.7	97.6	100.5	97.5
P62737	Actin, aortic smooth muscle OS=Mus musculus OX=10090 GN=Acta2 PE=1 SV=1	59	26	478	8	377	42	5.39	1487.02	101.2	100.5	98.1	98.8	100.6	100.8
Q6ZPE2	Myotubularin-related protein 5 OS=Mus musculus OX=10090 GN=Sbf1 PE=1 SV=2	28	43	89	40	1867	208.6	7.12	293.72	102.4	97.7	99	98.5	101.8	100.6
O08532	Voltage-dependent calcium channel subunit alpha-2/delta-1 OS=Mus musculus OX=10090 GN=Cacna2d1 PE=1 SV=1	31	34	95	33	1103	124.6	5.3	299.46	102.4	100.1	102.3	97.5	99.4	98.3
Q9Z2H5	Band 4.1-like protein 1 OS=Mus musculus OX=10090 GN=Epb41l1 PE=1 SV=2	36	34	95	34	879	98.3	5.62	302.79	99.9	99.9	99.9	102.2	99.2	98.8
Q9CS84	Neurexin-1 OS=Mus musculus OX=10090 GN=Nrxn1 PE=1 SV=3	27	38	91	32	1514	166.1	6.09	295.21	99	99.4	99.7	102.4	101.2	98.3
D3YVF0	A-kinase anchor protein 5 OS=Mus musculus OX=10090 GN=Akap5 PE=1 SV=2	52	28	71	28	745	79.4	4.75	293.61	101.3	95.4	98.8	105.5	103.3	95.8
Q9WUB3	Glycogen phosphorylase, muscle form OS=Mus musculus OX=10090 GN=Pygm PE=1 SV=3	46	43	88	33	842	97.2	7.11	301.65	104.9	92.5	108	95.6	107	92
Q04447	Creatine kinase B-type OS=Mus musculus OX=10090 GN=Ckb PE=1 SV=1	81	26	234	23	381	42.7	5.67	742.64	102.9	98.2	98.9	100.7	103	96.4
Q9JI91	Alpha-actinin-2 OS=Mus musculus OX=10090 GN=Actn2 PE=1 SV=2	46	38	75	26	894	103.8	5.45	261.35	103.2	94.2	98.1	96.3	106.4	101.8
Q11011	Puromycin-sensitive aminopeptidase OS=Mus musculus OX=10090 GN=Npepps PE=1 SV=2	44	38	99	37	920	103.3	5.9	319.86	100.9	100.1	101.3	98.5	101	98.2
P10126	Elongation factor 1-alpha 1 OS=Mus musculus OX=10090 GN=Eef1a1 PE=1 SV=3	56	28	167	14	462	50.1	9.01	501.05	100.2	105.1	101.1	98.1	95.7	99.8
P28663	Beta-soluble NSF attachment protein OS=Mus musculus OX=10090 GN=Napb PE=1 SV=2	69	21	115	17	298	33.5	5.47	418.77	101.3	98.9	99.8	98.9	103.1	98.1
Q62108	Disks large homolog 4 OS=Mus musculus OX=10090 GN=Dlg4 PE=1 SV=1	41	32	99	29	724	80.4	5.87	338.22	103	99.6	99.7	98	103.6	96.1
Q61644	Protein kinase C and casein kinase substrate in neurons protein 1 OS=Mus musculus OX=10090 GN=Pacsin1 PE=1 SV=1	57	30	111	27	441	50.5	5.24	374.1	105.6	98.8	96.6	97.4	105.1	96.5
Q0KL02	Triple functional domain protein OS=Mus musculus OX=10090 GN=Trio PE=1 SV=3	15	45	80	36	3102	347.6	6.35	245.33	94.5	99.3	100.2	101.1	102.2	102.7
P40142	Transketolase OS=Mus musculus OX=10090 GN=Tkt PE=1 SV=1	58	31	92	31	623	67.6	7.5	366.68	103.7	100.6	98.3	97.8	98.9	100.8
Q8QZT1	Acetyl-CoA acetyltransferase, mitochondrial OS=Mus musculus OX=10090 GN=Acat1 PE=1 SV=1	49	23	120	23	424	44.8	8.51	427.69	97.5	101.6	99.8	100.3	99.3	101.4
Q3UHL1	CaM kinase-like vesicle-associated protein OS=Mus musculus OX=10090 GN=Camkv PE=1 SV=2	59	28	101	28	512	54.8	5.54	383.97	100.2	101.3	98.3	99.5	102.4	98.4
Q9Z0E0	Neurochondrin OS=Mus musculus OX=10090 GN=Ncdn PE=1 SV=1	41	28	137	28	729	78.8	5.54	465.36	97.5	104	99.1	101.2	98.6	99.5
Q9EQF6	Dihydropyrimidinase-related protein 5 OS=Mus musculus OX=10090 GN=Dpysl5 PE=1 SV=1	56	28	141	28	564	61.5	7.09	447.19	94.1	103.2	102.3	102.5	94.6	103.3
P20152	Vimentin OS=Mus musculus OX=10090 GN=Vim PE=1 SV=3	65	36	114	29	466	53.7	5.12	378.54	109.8	94.6	98.9	103.5	92	101.3
Q80U28	MAP kinase-activating death domain protein OS=Mus musculus OX=10090 GN=Madd PE=1 SV=2	25	37	70	37	1577	175.1	6.04	238.8	99.9	100.2	98.6	103.1	97.5	100.7
P68404	Protein kinase C beta type OS=Mus musculus OX=10090 GN=Prkcb PE=1 SV=4	46	33	114	20	671	76.7	7.01	393.55	102.1	101.4	99.3	95.8	102.1	99.1
Q7TMB8	Cytoplasmic FMR1-interacting protein 1 OS=Mus musculus OX=10090 GN=Cyfip1 PE=1 SV=1	32	36	104	20	1253	145.1	6.9	301.42	98.1	101.1	100.9	100	101.2	98.7
Q8R081	Heterogeneous nuclear ribonucleoprotein L OS=Mus musculus OX=10090 GN=Hnrnpl PE=1 SV=2	53	26	112	26	586	63.9	8.1	351.89	98.2	102.9	101.2	102.5	95.6	99.7
O55131	Septin-7 OS=Mus musculus OX=10090 GN=Septin7 PE=1 SV=1	50	29	128	27	436	50.5	8.57	413.36	105.2	98.7	96.9	99.9	101.9	97.4
Q810U4	Neuronal cell adhesion molecule OS=Mus musculus OX=10090 GN=Nrcam PE=1 SV=2	27	28	96	28	1256	138.4	5.91	328.67	99.8	100.1	99.1	99.2	99.8	102
Q99MI1	ELKS/Rab6-interacting/CAST family member 1 OS=Mus musculus OX=10090 GN=Erc1 PE=1 SV=1	37	48	108	33	1120	128.3	5.87	301.83	92	102.1	103.3	102.2	96.4	103.9
Q6ZQ38	Cullin-associated NEDD8-dissociated protein 1 OS=Mus musculus OX=10090 GN=Cand1 PE=1 SV=2	29	40	121	36	1230	136.2	5.78	375.21	102.4	100.4	99.1	100.4	99.9	97.7
Q2PFD7	PH and SEC7 domain-containing protein 3 OS=Mus musculus OX=10090 GN=Psd3 PE=1 SV=2	32	39	113	39	1037	114.7	6.24	365.58	98	96.7	102.2	101.6	101.9	99.6
O35098	Dihydropyrimidinase-related protein 4 OS=Mus musculus OX=10090 GN=Dpysl4 PE=1 SV=1	54	26	120	23	572	61.9	6.98	435.36	100.1	99	101.3	101.1	97.8	100.7
Q6URW6	Myosin-14 OS=Mus musculus OX=10090 GN=Myh14 PE=1 SV=1	23	44	81	36	2000	228.4	5.55	251.26	99.9	99.3	100.9	98.3	100.7	101
P16054	Protein kinase C epsilon type OS=Mus musculus OX=10090 GN=Prkce PE=1 SV=1	47	35	102	35	737	83.5	7.03	328.5	100.5	110.3	98.3	95.5	95.7	99.7
Q64514	Tripeptidyl-peptidase 2 OS=Mus musculus OX=10090 GN=Tpp2 PE=1 SV=3	33	40	87	40	1262	139.8	6.58	252.6	98.8	102.7	101.3	101.5	94.7	101.1
Q64487	Receptor-type tyrosine-protein phosphatase delta OS=Mus musculus OX=10090 GN=Ptprd PE=1 SV=3	23	36	68	28	1912	214.3	6.55	240.83	101.1	99.8	99.1	98.7	102.8	98.5
Q8BSS9	Liprin-alpha-2 OS=Mus musculus OX=10090 GN=Ppfia2 PE=1 SV=2	33	46	68	41	1257	143.1	6.11	214.27	97.9	100.8	100.6	99.3	97.7	103.7
Q8K2B3	Succinate dehydrogenase [ubiquinone] flavoprotein subunit, mitochondrial OS=Mus musculus OX=10090 GN=Sdha PE=1 SV=1	55	29	86	29	664	72.5	7.37	315.97	101.2	99.1	100.2	102.4	99.4	97.5
Q9QYB8	Beta-adducin OS=Mus musculus OX=10090 GN=Add2 PE=1 SV=4	43	28	98	27	725	80.6	6.21	297.65	104	100.2	97.5	98.8	100.3	99.2
Q60932	Voltage-dependent anion-selective channel protein 1 OS=Mus musculus OX=10090 GN=Vdac1 PE=1 SV=3	74	23	162	21	296	32.3	8.43	644.21	100.8	98.9	98	99.5	104.3	98.6
Q8BTM8	Filamin-A OS=Mus musculus OX=10090 GN=Flna PE=1 SV=5	19	41	60	38	2647	281	6.04	203.02	116.6	96.2	94.4	96.2	97.5	99.2
P11798	Calcium/calmodulin-dependent protein kinase type II subunit alpha OS=Mus musculus OX=10090 GN=Camk2a PE=1 SV=2	51	31	176	23	478	54.1	7.08	518.2	105.6	102.2	90.9	94	109.7	97.6
P59764	Dedicator of cytokinesis protein 4 OS=Mus musculus OX=10090 GN=Dock4 PE=1 SV=1	24	47	77	45	1978	226.4	7.65	245.56	95.7	102.1	97.2	99.9	101.3	103.8
Q6ZPJ3	(E3-independent) E2 ubiquitin-conjugating enzyme UBE2O OS=Mus musculus OX=10090 GN=Ube2o PE=1 SV=3	29	33	91	33	1288	140.7	5.06	311.98	97.6	99.7	101	99.4	101.2	101
P80318	T-complex protein 1 subunit gamma OS=Mus musculus OX=10090 GN=Cct3 PE=1 SV=1	53	32	89	32	545	60.6	6.7	310.77	98.1	102	101.6	99.8	97.4	101.1
E9Q912	Rap1 GTPase-GDP dissociation stimulator 1 OS=Mus musculus OX=10090 GN=Rap1gds1 PE=2 SV=1	51	25	89	25	607	66	5.35	332.77	96.2	102.3	103	101.9	95.5	101.1
O88342	WD repeat-containing protein 1 OS=Mus musculus OX=10090 GN=Wdr1 PE=1 SV=3	51	28	116	28	606	66.4	6.6	460.39	102	102.4	100.4	99	98.1	98.1
P03995	Glial fibrillary acidic protein OS=Mus musculus OX=10090 GN=Gfap PE=1 SV=4	71	37	124	36	430	49.9	5.34	407.45	109.7	93.2	95.1	95.5	104.1	102.3
P46660	Alpha-internexin OS=Mus musculus OX=10090 GN=Ina PE=1 SV=3	68	39	140	34	501	55.3	5.4	445.64	108.7	92.9	95.3	95.5	105.2	102.5
O08638	Myosin-11 OS=Mus musculus OX=10090 GN=Myh11 PE=1 SV=1	19	39	86	22	1972	226.9	5.45	259.33	127.8	93.5	88.8	91.5	106.3	92.1
Q61656	Probable ATP-dependent RNA helicase DDX5 OS=Mus musculus OX=10090 GN=Ddx5 PE=1 SV=2	47	34	86	24	614	69.2	8.92	264.06	97.5	102.9	101.3	102.6	93.9	101.8
P05202	Aspartate aminotransferase, mitochondrial OS=Mus musculus OX=10090 GN=Got2 PE=1 SV=1	60	31	143	31	430	47.4	9	422.99	103.7	100.4	96.2	98.9	104.5	96.3
Q99P72	Reticulon-4 OS=Mus musculus OX=10090 GN=Rtn4 PE=1 SV=2	27	32	95	32	1162	126.5	4.54	284.43	99.3	99.4	100	100.4	96.7	104.2
Q61553	Fascin OS=Mus musculus OX=10090 GN=Fscn1 PE=1 SV=4	66	31	85	31	493	54.5	6.89	300.68	96.3	99.6	101.9	100.2	99.8	102.1
Q8BFR5	Elongation factor Tu, mitochondrial OS=Mus musculus OX=10090 GN=Tufm PE=1 SV=1	60	26	72	26	452	49.5	7.56	254.76	98.6	99.2	100.3	100.7	102.1	99.1
Q9Z0P4	Paralemmin-1 OS=Mus musculus OX=10090 GN=Palm PE=1 SV=1	57	27	98	25	383	41.6	4.84	336.58	104.6	98.3	100.5	100.3	96.9	99.5
Q9QXL2	Kinesin-like protein KIF21A OS=Mus musculus OX=10090 GN=Kif21a PE=1 SV=2	24	38	71	35	1672	186.4	6.27	221.42	99.2	98.9	100.2	99	100.7	102
P33173	Kinesin-like protein KIF1A OS=Mus musculus OX=10090 GN=Kif1a PE=1 SV=2	26	43	96	32	1695	191.6	6.2	282.11	96.2	98.3	98.9	101.2	101.6	103.8
P61264	Syntaxin-1B OS=Mus musculus OX=10090 GN=Stx1b PE=1 SV=1	55	22	113	18	288	33.2	5.38	380.12	104.1	97.1	97.8	100	105.4	95.6
Q05920	Pyruvate carboxylase, mitochondrial OS=Mus musculus OX=10090 GN=Pc PE=1 SV=1	32	37	86	37	1178	129.6	6.71	294.21	102.5	98.6	98.3	99.3	104.3	96.9
P10637	Microtubule-associated protein tau OS=Mus musculus OX=10090 GN=Mapt PE=1 SV=3	39	29	152	28	733	76.2	6.79	473.15	99.6	101.3	99.5	100.2	96.3	103.2
Q7TQF7	Amphiphysin OS=Mus musculus OX=10090 GN=Amph PE=1 SV=1	40	30	82	28	686	75	4.63	286.65	101.4	102.1	101.3	97.5	99.3	98.3
Q812A2	SLIT-ROBO Rho GTPase-activating protein 3 OS=Mus musculus OX=10090 GN=Srgap3 PE=1 SV=1	32	30	69	26	1099	124.3	6.67	232.19	98.6	99.4	100.8	99	98.8	103.5
P12382	ATP-dependent 6-phosphofructokinase, liver type OS=Mus musculus OX=10090 GN=Pfkl PE=1 SV=4	36	29	95	22	780	85.3	7.17	315.12	98.5	100	97.6	97.2	104.4	102.3
Q9QYC0	Alpha-adducin OS=Mus musculus OX=10090 GN=Add1 PE=1 SV=2	42	27	93	26	735	80.6	5.9	296.54	101.6	100	98.5	99.6	100.1	100.1
P70175	Disks large homolog 3 OS=Mus musculus OX=10090 GN=Dlg3 PE=1 SV=1	40	34	86	32	849	93.4	6.79	262.65	99.8	102.8	100	97.7	99.5	100.2
Q9D0E1	Heterogeneous nuclear ribonucleoprotein M OS=Mus musculus OX=10090 GN=Hnrnpm PE=1 SV=3	52	38	87	38	729	77.6	8.63	236.41	98.3	102.7	99.4	102.8	95.1	101.5
Q9QZQ1	Afadin OS=Mus musculus OX=10090 GN=Afdn PE=1 SV=3	27	43	60	43	1820	206.4	6.32	170.1	95.9	99.4	101.3	101.4	99.9	102
Q8BX70	Vacuolar protein sorting-associated protein 13C OS=Mus musculus OX=10090 GN=Vps13c PE=1 SV=2	13	43	63	42	3748	419.8	6.81	172.97	102.4	97.3	102.1	97.6	104	96.5
Q91V92	ATP-citrate synthase OS=Mus musculus OX=10090 GN=Acly PE=1 SV=1	33	37	91	37	1091	119.7	7.44	315.82	101	98.8	100.7	98.5	99.4	101.5
Q9ERU9	E3 SUMO-protein ligase RanBP2 OS=Mus musculus OX=10090 GN=Ranbp2 PE=1 SV=2	17	50	70	49	3053	340.9	6.18	171.16	99.3	101.5	100	99.9	101.4	97.9
Q61595	Kinectin OS=Mus musculus OX=10090 GN=Ktn1 PE=1 SV=1	31	40	86	39	1327	152.5	5.86	263.8	94.7	100.5	100	101.1	99.3	104.3
Q62167	ATP-dependent RNA helicase DDX3X OS=Mus musculus OX=10090 GN=Ddx3x PE=1 SV=3	54	34	80	11	662	73.1	7.18	234.43	96.8	98.6	99.4	103.9	97.5	103.8
Q99NE5	Regulating synaptic membrane exocytosis protein 1 OS=Mus musculus OX=10090 GN=Rims1 PE=1 SV=2	28	37	73	36	1463	163.1	9.42	196.45	100.9	99.2	100.3	97.6	101.6	100.4
Q91V14	Solute carrier family 12 member 5 OS=Mus musculus OX=10090 GN=Slc12a5 PE=1 SV=2	26	32	102	26	1138	126.2	6.74	273.15	98.8	100.9	98.9	103	101.5	96.8
Q3UHD9	Arf-GAP with GTPase, ANK repeat and PH domain-containing protein 2 OS=Mus musculus OX=10090 GN=Agap2 PE=1 SV=1	35	38	78	38	1186	124.4	9.89	232.25	99.4	102.8	98.8	99.8	97.5	101.7
Q8BZ98	Dynamin-3 OS=Mus musculus OX=10090 GN=Dnm3 PE=1 SV=1	40	39	100	21	863	97.1	8.35	292.36	100.4	100	100.5	98.8	102.1	98.2
P23818	Glutamate receptor 1 OS=Mus musculus OX=10090 GN=Gria1 PE=1 SV=1	32	30	96	24	907	101.5	7.69	291.16	96.2	109.5	102.1	95.1	96.6	100.5
Q80TV8	CLIP-associating protein 1 OS=Mus musculus OX=10090 GN=Clasp1 PE=1 SV=2	27	40	61	34	1535	169.1	9.03	186.04	97.9	100.2	101.2	99.1	99	102.6
P09405	Nucleolin OS=Mus musculus OX=10090 GN=Ncl PE=1 SV=2	44	44	95	44	707	76.7	4.75	262.89	94	101	101.3	104.4	100.1	99.3
Q9JM52	Misshapen-like kinase 1 OS=Mus musculus OX=10090 GN=Mink1 PE=1 SV=3	28	39	92	29	1308	147.2	7.44	271.78	98.9	101.6	98.8	97.3	100.8	102.6
Q8CJ40	Rootletin OS=Mus musculus OX=10090 GN=Crocc PE=1 SV=2	23	45	59	44	2009	226.8	5.55	146.87	100.8	98.2	100.4	98.2	101.8	100.5
Q9Z1Q9	Valine--tRNA ligase OS=Mus musculus OX=10090 GN=Vars1 PE=1 SV=1	27	31	80	31	1263	140.1	7.77	298.2	99.5	99.4	100.9	100.9	99.9	99.4
O35927	Catenin delta-2 OS=Mus musculus OX=10090 GN=Ctnnd2 PE=1 SV=1	32	36	89	32	1247	134.9	7.65	257.57	99.5	97.3	100.6	101.7	101.7	99.2
Q6P4T2	U5 small nuclear ribonucleoprotein 200 kDa helicase OS=Mus musculus OX=10090 GN=Snrnp200 PE=1 SV=1	20	41	79	41	2136	244.4	6.06	238.92	98.5	101.9	101.8	100.8	96.8	100.2
Q9JJZ2	Tubulin alpha-8 chain OS=Mus musculus OX=10090 GN=Tuba8 PE=1 SV=1	41	17	275	3	449	50	5.1	959.08	102.8	92.2	97.2	94.3	109.3	104.2
P48678	Prelamin-A/C OS=Mus musculus OX=10090 GN=Lmna PE=1 SV=2	56	39	77	38	665	74.2	6.98	247.79	102.8	96.9	99	102.6	101.9	96.9
Q501J6	Probable ATP-dependent RNA helicase DDX17 OS=Mus musculus OX=10090 GN=Ddx17 PE=1 SV=1	43	30	73	20	650	72.4	8.59	223.72	97.5	98.8	100.2	101.7	100.5	101.3
P84091	AP-2 complex subunit mu OS=Mus musculus OX=10090 GN=Ap2m1 PE=1 SV=1	57	28	110	28	435	49.6	9.54	339.13	102.6	100.8	97.9	99.5	103	96.2
P14211	Calreticulin OS=Mus musculus OX=10090 GN=Calr PE=1 SV=1	69	29	111	29	416	48	4.49	319.41	94.7	104.5	105.6	100	94.6	100.6
Q3TXS7	26S proteasome non-ATPase regulatory subunit 1 OS=Mus musculus OX=10090 GN=Psmd1 PE=1 SV=1	38	31	60	31	953	105.7	5.39	214.23	99.5	100.2	101.9	99.8	98.1	100.6
Q4KUS2	Protein unc-13 homolog A OS=Mus musculus OX=10090 GN=Unc13a PE=1 SV=3	20	39	86	26	1712	193.7	5.25	254.62	99.5	99.9	99.6	97.9	102.1	101
O70133	ATP-dependent RNA helicase A OS=Mus musculus OX=10090 GN=Dhx9 PE=1 SV=2	25	35	90	35	1380	149.4	6.83	264.93	98.7	101.6	99.2	102.8	98.8	98.9
P55066	Neurocan core protein OS=Mus musculus OX=10090 GN=Ncan PE=1 SV=1	25	31	75	30	1268	137.1	5.72	282.12	98	100.9	100.1	100	101.6	99.5
P46096	Synaptotagmin-1 OS=Mus musculus OX=10090 GN=Syt1 PE=1 SV=1	54	26	125	16	421	47.4	8.53	392.08	103.8	100.1	97.1	99	101.6	98.4
Q80XI3	Eukaryotic translation initiation factor 4 gamma 3 OS=Mus musculus OX=10090 GN=Eif4g3 PE=1 SV=2	25	38	65	34	1579	174.8	5.53	198.36	94.3	99.9	99	105.4	97.3	104.1
Q9Z218	Dipeptidyl aminopeptidase-like protein 6 OS=Mus musculus OX=10090 GN=Dpp6 PE=1 SV=1	34	32	87	30	804	91.2	6.68	280.36	101.9	99.5	100.2	99.8	100.7	97.9
P35564	Calnexin OS=Mus musculus OX=10090 GN=Canx PE=1 SV=1	47	31	80	30	591	67.2	4.64	231.64	98.3	101.4	103.7	100.2	95.5	101
Q5SWU9	Acetyl-CoA carboxylase 1 OS=Mus musculus OX=10090 GN=Acaca PE=1 SV=1	18	40	67	40	2345	265.1	6.39	193	98	99.2	99.6	101.1	98.8	103.3
Q921I1	Serotransferrin OS=Mus musculus OX=10090 GN=Tf PE=1 SV=1	42	30	85	30	697	76.7	7.18	289.36	102.7	102	106.5	95.3	91.3	102.2
P63328	Serine/threonine-protein phosphatase 2B catalytic subunit alpha isoform OS=Mus musculus OX=10090 GN=Ppp3ca PE=1 SV=1	44	22	135	15	521	58.6	5.86	429.3	101.1	104.4	97.8	96.1	102.4	98.1
Q8BGQ7	Alanine--tRNA ligase, cytoplasmic OS=Mus musculus OX=10090 GN=Aars1 PE=1 SV=1	38	34	73	34	968	106.8	5.67	222.14	101.1	99	99	98.4	103	99.5
P80315	T-complex protein 1 subunit delta OS=Mus musculus OX=10090 GN=Cct4 PE=1 SV=3	55	28	103	27	539	58	8.02	341.31	99	102.2	100.8	99.8	98.3	100
P62631	Elongation factor 1-alpha 2 OS=Mus musculus OX=10090 GN=Eef1a2 PE=1 SV=1	64	26	156	13	463	50.4	9.03	411.67	101.3	101.4	101.6	100.8	97.1	97.8
P48962	ADP/ATP translocase 1 OS=Mus musculus OX=10090 GN=Slc25a4 PE=1 SV=4	60	27	202	18	298	32.9	9.72	530.42	99.4	100	98.7	100.9	106.5	94.5
P58771	Tropomyosin alpha-1 chain OS=Mus musculus OX=10090 GN=Tpm1 PE=1 SV=1	70	33	101	11	284	32.7	4.74	274	105.3	99.2	100	96.8	100.2	98.5
P68510	14-3-3 protein eta OS=Mus musculus OX=10090 GN=Ywhah PE=1 SV=2	67	19	179	14	246	28.2	4.89	517.76	99.7	103.6	102.3	100.3	93.3	100.9
P19246	Neurofilament heavy polypeptide OS=Mus musculus OX=10090 GN=Nefh PE=1 SV=3	32	43	108	39	1090	116.9	5.81	266.14	110.5	89.3	94.3	98.5	104.3	103.1
Q62420	Endophilin-A1 OS=Mus musculus OX=10090 GN=Sh3gl2 PE=1 SV=2	57	24	127	16	352	39.9	5.39	374.03	104.8	96.2	98.3	95.9	106.8	98.1
Q8VDJ3	Vigilin OS=Mus musculus OX=10090 GN=Hdlbp PE=1 SV=1	32	37	60	37	1268	141.7	6.87	179.6	92.8	100.9	99.9	104.8	98.1	103.5
O54774	AP-3 complex subunit delta-1 OS=Mus musculus OX=10090 GN=Ap3d1 PE=1 SV=1	31	36	66	36	1199	135	7.37	216.26	96.1	100.1	101.3	103.6	98.4	100.5
P68254	14-3-3 protein theta OS=Mus musculus OX=10090 GN=Ywhaq PE=1 SV=1	69	23	205	17	245	27.8	4.78	664.68	97.4	102	98.9	99.3	101.5	100.8
P14733	Lamin-B1 OS=Mus musculus OX=10090 GN=Lmnb1 PE=1 SV=3	53	33	73	29	588	66.7	5.16	223.4	98.7	99.2	101.3	103.3	97	100.4
Q3TLH4	Protein PRRC2C OS=Mus musculus OX=10090 GN=Prrc2c PE=1 SV=3	16	45	83	42	2846	310.7	9.1	161.69	96.5	101.9	102	100.4	97.3	101.9
Q9Z2I9	Succinate--CoA ligase [ADP-forming] subunit beta, mitochondrial OS=Mus musculus OX=10090 GN=Sucla2 PE=1 SV=2	48	25	109	25	463	50.1	7.01	371.38	101.8	100.7	99.4	96.5	106.5	95.2
E9PVA8	eIF-2-alpha kinase activator GCN1 OS=Mus musculus OX=10090 GN=Gcn1 PE=1 SV=1	18	45	69	43	2671	292.8	7.36	191.23	95.8	100.4	102.6	99.4	98.4	103.3
P62761	Visinin-like protein 1 OS=Mus musculus OX=10090 GN=Vsnl1 PE=1 SV=2	80	19	107	14	191	22.1	5.15	333.81	100.5	96.5	98.8	105.7	99.4	99.1
Q76MZ3	Serine/threonine-protein phosphatase 2A 65 kDa regulatory subunit A alpha isoform OS=Mus musculus OX=10090 GN=Ppp2r1a PE=1 SV=3	48	27	124	27	589	65.3	5.11	351.86	101	101.4	99	99.3	99.3	100
Q811D0	Disks large homolog 1 OS=Mus musculus OX=10090 GN=Dlg1 PE=1 SV=1	34	34	81	25	905	100.1	5.8	253.24	102.7	96.2	100.4	98.7	103.5	98.4
Q8K0T0	Reticulon-1 OS=Mus musculus OX=10090 GN=Rtn1 PE=1 SV=1	38	22	77	21	780	83.5	4.58	288.4	99.6	98.5	100.4	101.6	102.4	97.5
P42859	Huntingtin OS=Mus musculus OX=10090 GN=Htt PE=1 SV=2	13	40	78	40	3119	344.5	6.29	225.29	100	100.3	99.3	100.6	100.1	99.7
P26040	Ezrin OS=Mus musculus OX=10090 GN=Ezr PE=1 SV=3	52	39	71	26	586	69.4	6.1	192.72	100.3	105.6	103.6	98.2	94.8	97.6
P21107	Tropomyosin alpha-3 chain OS=Mus musculus OX=10090 GN=Tpm3 PE=1 SV=3	65	31	112	12	285	33	4.72	323.56	102.3	100.9	96.6	96.8	99.6	103.9
O35551	Rab GTPase-binding effector protein 1 OS=Mus musculus OX=10090 GN=Rabep1 PE=1 SV=2	44	39	68	39	862	99.5	5.01	198.63	98.3	98.7	100.8	98.9	102	101.3
Q91W50	Cold shock domain-containing protein E1 OS=Mus musculus OX=10090 GN=Csde1 PE=1 SV=1	42	35	70	35	798	88.7	6.37	214.59	96.8	100.9	100.9	101.5	98.1	101.8
Q80SW1	S-adenosylhomocysteine hydrolase-like protein 1 OS=Mus musculus OX=10090 GN=Ahcyl1 PE=1 SV=1	43	29	88	12	530	58.9	6.89	271.66	101.8	99.6	101	98.9	103.7	95
Q6NZJ6	Eukaryotic translation initiation factor 4 gamma 1 OS=Mus musculus OX=10090 GN=Eif4g1 PE=1 SV=1	23	38	65	34	1600	176	5.4	190.93	94.5	101.6	101.7	101.7	98.2	102.4
Q5SSL4	Active breakpoint cluster region-related protein OS=Mus musculus OX=10090 GN=Abr PE=1 SV=1	37	34	69	29	859	97.6	6.58	204.53	97.8	101.3	99	100.6	102.6	98.6
Q8BIJ6	Isoleucine--tRNA ligase, mitochondrial OS=Mus musculus OX=10090 GN=Iars2 PE=1 SV=1	37	31	77	31	1012	112.7	6.81	228.69	99.5	99	98.4	99.6	106.1	97.4
Q02248	Catenin beta-1 OS=Mus musculus OX=10090 GN=Ctnnb1 PE=1 SV=1	39	27	86	23	781	85.4	5.86	268.8	99.2	102	100.6	102.2	98.9	97.1
P43006	Excitatory amino acid transporter 2 OS=Mus musculus OX=10090 GN=Slc1a2 PE=1 SV=1	34	21	137	21	572	62	6.68	396.8	99.2	100.4	96.6	105.3	103.2	95.2
Q3U1J4	DNA damage-binding protein 1 OS=Mus musculus OX=10090 GN=Ddb1 PE=1 SV=2	33	36	65	36	1140	126.8	5.26	195.71	97.8	99.4	100.2	102.9	100.7	98.9
Q9CWZ7	Gamma-soluble NSF attachment protein OS=Mus musculus OX=10090 GN=Napg PE=1 SV=1	62	19	86	19	312	34.7	5.41	284.26	103	99.5	98	96.4	102.4	100.7
P28740	Kinesin-like protein KIF2A OS=Mus musculus OX=10090 GN=Kif2a PE=1 SV=2	39	29	91	29	705	79.7	6.73	283.03	99.4	99.6	99.8	100.6	99.4	101.2
Q8BYR5	Calcium-dependent secretion activator 2 OS=Mus musculus OX=10090 GN=Cadps2 PE=1 SV=2	26	31	54	23	1297	147.7	6.14	183.22	96.6	101	98.8	99	103.4	101.2
P15105	Glutamine synthetase OS=Mus musculus OX=10090 GN=Glul PE=1 SV=6	54	21	163	21	373	42.1	7.08	508.37	103.7	99.7	98.6	98.8	101.7	97.4
Q60875	Rho guanine nucleotide exchange factor 2 OS=Mus musculus OX=10090 GN=Arhgef2 PE=1 SV=4	39	39	83	39	985	111.9	7.25	253.3	96.1	104	99.8	99.8	97.8	102.5
P39054	Dynamin-2 OS=Mus musculus OX=10090 GN=Dnm2 PE=1 SV=2	32	34	119	13	870	98.1	7.43	308.98	101.7	100.4	97.7	98.1	99.9	102.2
Q4ACU6	SH3 and multiple ankyrin repeat domains protein 3 OS=Mus musculus OX=10090 GN=Shank3 PE=1 SV=3	26	39	75	37	1730	185.3	8.88	196.06	100.8	99.3	99.4	97.8	102.3	100.5
P80314	T-complex protein 1 subunit beta OS=Mus musculus OX=10090 GN=Cct2 PE=1 SV=4	49	25	75	25	535	57.4	6.4	274.51	99.7	101.1	101.4	98.6	97.1	102
P61922	4-aminobutyrate aminotransferase, mitochondrial OS=Mus musculus OX=10090 GN=Abat PE=1 SV=1	53	20	61	20	500	56.4	8.09	247.91	102.5	94.1	100.6	98.2	103.2	101.3
Q9DBJ1	Phosphoglycerate mutase 1 OS=Mus musculus OX=10090 GN=Pgam1 PE=1 SV=3	62	15	123	11	254	28.8	7.18	432.84	101.8	98.4	99.7	99	100.8	100.2
Q99JF8	PC4 and SFRS1-interacting protein OS=Mus musculus OX=10090 GN=Psip1 PE=1 SV=1	45	29	79	28	528	59.7	9.13	214.87	95.8	100.5	100.5	102.1	102.7	98.4
B9EJA2	Cortactin-binding protein 2 OS=Mus musculus OX=10090 GN=Cttnbp2 PE=1 SV=2	19	33	70	33	1648	178.7	8.19	216.78	98.9	100.7	100.7	101.9	97.7	100.1
Q00PI9	Heterogeneous nuclear ribonucleoprotein U-like protein 2 OS=Mus musculus OX=10090 GN=Hnrnpul2 PE=1 SV=2	41	33	78	33	745	84.9	4.89	217.65	98.6	100	99.2	102.4	100.7	99.2
Q3U0V1	Far upstream element-binding protein 2 OS=Mus musculus OX=10090 GN=Khsrp PE=1 SV=2	40	30	83	28	748	76.7	7.33	274.91	99.9	102.3	99.9	100.9	96.9	100.1
Q9CYT6	Adenylyl cyclase-associated protein 2 OS=Mus musculus OX=10090 GN=Cap2 PE=1 SV=1	46	22	95	21	476	52.8	6.43	338.69	101.1	99.6	94.8	101.6	101.7	101.3
Q922S4	cGMP-dependent 3',5'-cyclic phosphodiesterase OS=Mus musculus OX=10090 GN=Pde2a PE=1 SV=4	35	29	81	29	939	105.6	5.41	254.42	98.3	98.6	101.6	101.2	103.4	96.8
Q8VDM4	26S proteasome non-ATPase regulatory subunit 2 OS=Mus musculus OX=10090 GN=Psmd2 PE=1 SV=1	34	30	75	30	908	100.1	5.17	235.18	98.6	101.5	100.9	100.8	97.2	101.1
Q3UQ44	Ras GTPase-activating-like protein IQGAP2 OS=Mus musculus OX=10090 GN=Iqgap2 PE=1 SV=2	23	38	75	35	1575	180.4	5.64	220.94	90.7	106	99	96.7	99.7	108
O70161	Phosphatidylinositol 4-phosphate 5-kinase type-1 gamma OS=Mus musculus OX=10090 GN=Pip5k1c PE=1 SV=2	36	22	79	19	661	72.4	5.59	285.09	100.9	101.3	98.9	99.6	102.2	97.2
Q9DB77	Cytochrome b-c1 complex subunit 2, mitochondrial OS=Mus musculus OX=10090 GN=Uqcrc2 PE=1 SV=1	49	21	120	21	453	48.2	9.25	479.6	102.1	99	99.8	99.9	102.5	96.8
Q62417	Sorbin and SH3 domain-containing protein 1 OS=Mus musculus OX=10090 GN=Sorbs1 PE=1 SV=2	29	35	71	34	1290	143	8.25	203.16	99.9	98.5	101.2	102.2	98.4	99.9
Q3TDD9	Protein phosphatase 1 regulatory subunit 21 OS=Mus musculus OX=10090 GN=Ppp1r21 PE=1 SV=2	43	36	62	35	780	88.3	6.9	203.41	97.8	99.5	100.2	101.5	96.8	104.1
P35486	Pyruvate dehydrogenase E1 component subunit alpha, somatic form, mitochondrial OS=Mus musculus OX=10090 GN=Pdha1 PE=1 SV=1	57	26	96	26	390	43.2	8.19	280.33	101.5	100.5	98.6	99.3	101.9	98.2
Q5F2E8	Serine/threonine-protein kinase TAO1 OS=Mus musculus OX=10090 GN=Taok1 PE=1 SV=1	33	33	61	26	1001	116	7.55	202.1	96.3	100.9	100.9	98.4	98.3	105.1
P40124	Adenylyl cyclase-associated protein 1 OS=Mus musculus OX=10090 GN=Cap1 PE=1 SV=4	52	22	61	21	474	51.5	7.52	229.73	101.7	103.4	95.9	97.8	100.1	101.1
P08003	Protein disulfide-isomerase A4 OS=Mus musculus OX=10090 GN=Pdia4 PE=1 SV=3	38	26	67	26	638	71.9	5.31	231.37	94.7	103	105.6	98	95.8	102.9
Q5SNZ0	Girdin OS=Mus musculus OX=10090 GN=Ccdc88a PE=1 SV=2	22	43	57	43	1873	215.8	6.24	156.53	96.5	103	102.1	101	95.3	102.1
Q8CIE6	Coatomer subunit alpha OS=Mus musculus OX=10090 GN=Copa PE=1 SV=2	30	34	61	34	1224	138.3	7.65	180.42	96.2	101.5	103.7	101.2	95.9	101.5
O88844	Isocitrate dehydrogenase [NADP] cytoplasmic OS=Mus musculus OX=10090 GN=Idh1 PE=1 SV=2	56	29	72	28	414	46.6	7.17	204.96	97.7	102.1	102.7	99.9	91.5	106
Q8C1B7	Septin-11 OS=Mus musculus OX=10090 GN=Septin11 PE=1 SV=4	44	26	98	10	431	49.7	6.68	315.5	102.6	96.9	98.3	101.8	103.1	97.4
Q9EQ20	Methylmalonate-semialdehyde dehydrogenase [acylating], mitochondrial OS=Mus musculus OX=10090 GN=Aldh6a1 PE=1 SV=1	47	24	76	24	535	57.9	8.07	261.86	102.3	99	102.2	99.9	102	94.6
Q8BVE3	V-type proton ATPase subunit H OS=Mus musculus OX=10090 GN=Atp6v1h PE=1 SV=1	43	18	64	18	483	55.8	6.61	233.63	102.1	100.3	98.3	98.2	102.7	98.4
Q8CGK3	Lon protease homolog, mitochondrial OS=Mus musculus OX=10090 GN=Lonp1 PE=1 SV=2	31	29	64	29	949	105.8	6.57	209.15	97.2	98.9	98.3	98.5	106.6	100.5
Q6P9K9	Neurexin-3 OS=Mus musculus OX=10090 GN=Nrxn3 PE=1 SV=2	19	28	70	21	1571	173.3	6.14	246.17	97.7	100.9	100.9	100.1	98.8	101.6
Q9JLM8	Serine/threonine-protein kinase DCLK1 OS=Mus musculus OX=10090 GN=Dclk1 PE=1 SV=1	40	27	69	24	756	84.1	8.87	251.43	95.8	105.1	103.4	102.5	90.6	102.6
Q9WTQ5	A-kinase anchor protein 12 OS=Mus musculus OX=10090 GN=Akap12 PE=1 SV=1	25	29	51	29	1684	180.6	4.44	154.01	95.9	95.3	100.7	104.3	99.3	104.6
Q9R1T4	Septin-6 OS=Mus musculus OX=10090 GN=Septin6 PE=1 SV=4	47	24	74	10	434	49.6	6.43	225.97	105.2	100.1	97.4	101.1	99.6	96.5
Q80YA9	Connector enhancer of kinase suppressor of ras 2 OS=Mus musculus OX=10090 GN=Cnksr2 PE=1 SV=1	30	29	74	29	1032	117.3	6.79	240.98	95.9	101.1	97.8	102.3	100.7	102.2
Q8K310	Matrin-3 OS=Mus musculus OX=10090 GN=Matr3 PE=1 SV=1	34	32	87	32	846	94.6	6.25	224.94	98.4	103.5	100.4	103.3	95.4	98.9
P61982	14-3-3 protein gamma OS=Mus musculus OX=10090 GN=Ywhag PE=1 SV=2	65	19	244	12	247	28.3	4.89	651.73	100.5	102.1	99.4	99.6	99.3	99.1
Q91VR5	ATP-dependent RNA helicase DDX1 OS=Mus musculus OX=10090 GN=Ddx1 PE=1 SV=1	43	28	70	28	740	82.4	7.21	228.43	99.9	101.7	100	100.1	99.9	98.4
Q9JLV5	Cullin-3 OS=Mus musculus OX=10090 GN=Cul3 PE=1 SV=1	38	31	62	30	768	88.9	8.46	187.32	100.4	99.4	100.4	98.1	102.5	99.2
Q91Z67	SLIT-ROBO Rho GTPase-activating protein 2 OS=Mus musculus OX=10090 GN=Srgap2 PE=1 SV=2	34	33	59	30	1071	120.7	6.64	175.88	95.6	100.6	101.3	101.5	97.5	103.5
P18872	Guanine nucleotide-binding protein G(o) subunit alpha OS=Mus musculus OX=10090 GN=Gnao1 PE=1 SV=3	41	16	124	14	354	40.1	5.53	364.32	103.6	99.3	99.2	99.7	100.4	97.8
Q922F4	Tubulin beta-6 chain OS=Mus musculus OX=10090 GN=Tubb6 PE=1 SV=1	32	13	433	1	447	50.1	4.89	825.82	73.2	103.2	117.1	110.5	95.8	100.1
Q3UVX5	Metabotropic glutamate receptor 5 OS=Mus musculus OX=10090 GN=Grm5 PE=1 SV=2	31	35	60	32	1203	131.8	7.84	181.86	98.2	101.9	101	98.3	100.9	99.7
Q9Z268	RasGAP-activating-like protein 1 OS=Mus musculus OX=10090 GN=Rasal1 PE=1 SV=2	38	33	71	33	799	89.3	6.37	225.23	99.1	97.5	100.5	101.6	101.2	100.1
Q8CHG7	Rap guanine nucleotide exchange factor 2 OS=Mus musculus OX=10090 GN=Rapgef2 PE=1 SV=2	26	30	69	30	1496	166.3	6.61	240.74	99.6	100.4	102.8	97.3	98.3	101.5
P97807	Fumarate hydratase, mitochondrial OS=Mus musculus OX=10090 GN=Fh PE=1 SV=3	49	21	79	21	507	54.3	9.04	253.99	100.9	99.6	99.5	98.8	104.2	97
Q9DBR7	Protein phosphatase 1 regulatory subunit 12A OS=Mus musculus OX=10090 GN=Ppp1r12a PE=1 SV=2	34	35	61	34	1029	114.9	5.49	147.92	101	99.7	101	99.7	97.9	100.7
Q9D6R2	Isocitrate dehydrogenase [NAD] subunit alpha, mitochondrial OS=Mus musculus OX=10090 GN=Idh3a PE=1 SV=1	53	22	102	22	366	39.6	6.73	278.13	101.9	101.6	97.4	100.3	101.4	97.4
P16125	L-lactate dehydrogenase B chain OS=Mus musculus OX=10090 GN=Ldhb PE=1 SV=2	47	19	102	18	334	36.5	6.05	336.37	103.2	98.2	100	100.9	103	94.7
Q9R111	Guanine deaminase OS=Mus musculus OX=10090 GN=Gda PE=1 SV=1	42	22	75	22	454	51	5.53	238.04	104.4	97.1	100.4	97.9	102.9	97.3
Q03137	Ephrin type-A receptor 4 OS=Mus musculus OX=10090 GN=Epha4 PE=1 SV=2	36	33	63	26	986	109.7	6.51	183.52	94.1	106.6	100.5	100.2	95.1	103.5
Q3UHK6	Teneurin-4 OS=Mus musculus OX=10090 GN=Tenm4 PE=1 SV=2	14	36	65	30	2771	308.2	6.57	171.44	98.4	96.3	101.3	100.2	102.1	101.7
Q8CJH3	Plexin-B1 OS=Mus musculus OX=10090 GN=Plxnb1 PE=1 SV=2	20	33	51	32	2119	231.2	5.55	170.16	100.2	96.8	99.9	99	103.3	100.8
Q6NZL0	Protein SOGA3 OS=Mus musculus OX=10090 GN=Soga3 PE=1 SV=2	31	32	75	27	945	103.4	6.14	233.78	99	101.3	100.1	97.1	100.1	102.4
P56399	Ubiquitin carboxyl-terminal hydrolase 5 OS=Mus musculus OX=10090 GN=Usp5 PE=1 SV=1	34	27	67	27	858	95.8	5.01	231.42	102.3	98.5	99	97.6	102.4	100.2
Q9EQH3	Vacuolar protein sorting-associated protein 35 OS=Mus musculus OX=10090 GN=Vps35 PE=1 SV=1	40	30	77	30	796	91.7	5.44	261.16	99.4	100.4	101.2	103.9	98.1	97
Q9CZW5	Mitochondrial import receptor subunit TOM70 OS=Mus musculus OX=10090 GN=Tomm70 PE=1 SV=2	51	34	93	34	611	67.5	7.53	265.29	98.9	101	99.2	98.9	105.3	96.6
Q5DU25	IQ motif and SEC7 domain-containing protein 2 OS=Mus musculus OX=10090 GN=Iqsec2 PE=1 SV=3	27	35	62	28	1478	161.7	8.56	172.84	100	99.9	98	99.9	104.5	97.7
Q922D8	C-1-tetrahydrofolate synthase, cytoplasmic OS=Mus musculus OX=10090 GN=Mthfd1 PE=1 SV=4	31	27	60	26	935	101.1	7.14	203.65	101.9	101.6	100.3	97.2	99.9	99.2
P09103	Protein disulfide-isomerase OS=Mus musculus OX=10090 GN=P4hb PE=1 SV=2	52	29	80	29	509	57	4.88	265.82	100	101.5	103.6	98.3	95.1	101.5
D3YXK2	Scaffold attachment factor B1 OS=Mus musculus OX=10090 GN=Safb PE=1 SV=2	32	32	70	25	937	105	5.35	185.45	98.2	100.6	105.8	101.8	94.8	98.8
Q8JZQ2	AFG3-like protein 2 OS=Mus musculus OX=10090 GN=Afg3l2 PE=1 SV=1	36	32	62	28	802	89.5	8.6	181.27	101.6	99.4	100	98.9	102	98.1
Q7TT50	Serine/threonine-protein kinase MRCK beta OS=Mus musculus OX=10090 GN=Cdc42bpb PE=1 SV=2	21	35	68	30	1713	194.6	6.46	196.02	97.5	99.8	101.5	100.4	97.8	103
Q9QXY6	EH domain-containing protein 3 OS=Mus musculus OX=10090 GN=Ehd3 PE=1 SV=2	48	23	56	15	535	60.8	6.46	214.93	101.2	99.9	100.7	97	102.2	99
O08539	Myc box-dependent-interacting protein 1 OS=Mus musculus OX=10090 GN=Bin1 PE=1 SV=1	42	22	61	20	588	64.4	5.03	221	103.3	99.6	99.3	97.3	100.9	99.6
Q99LF4	RNA-splicing ligase RtcB homolog OS=Mus musculus OX=10090 GN=Rtcb PE=1 SV=1	50	23	64	23	505	55.2	7.23	226.38	97.2	97.6	102	98.9	100.6	103.6
O88569	Heterogeneous nuclear ribonucleoproteins A2/B1 OS=Mus musculus OX=10090 GN=Hnrnpa2b1 PE=1 SV=2	58	23	113	19	353	37.4	8.95	330.69	97.8	103	101.5	102.9	95.7	99.1
Q78PY7	Staphylococcal nuclease domain-containing protein 1 OS=Mus musculus OX=10090 GN=Snd1 PE=1 SV=1	34	29	69	29	910	102	7.43	222.31	97.8	102.5	102.2	100.6	94.2	102.8
P20444	Protein kinase C alpha type OS=Mus musculus OX=10090 GN=Prkca PE=1 SV=3	33	27	89	14	672	76.8	7.14	268.08	105.7	101	99.9	98.8	96.6	97.9
Q91ZA3	Propionyl-CoA carboxylase alpha chain, mitochondrial OS=Mus musculus OX=10090 GN=Pcca PE=1 SV=2	42	26	63	26	724	79.9	7.25	213.43	101.5	100.4	98.4	99.1	101.6	99
P17742	Peptidyl-prolyl cis-trans isomerase A OS=Mus musculus OX=10090 GN=Ppia PE=1 SV=2	83	17	246	15	164	18	7.9	564.99	102.1	101.5	99.4	100.5	95	101.6
Q9WU78	Programmed cell death 6-interacting protein OS=Mus musculus OX=10090 GN=Pdcd6ip PE=1 SV=3	35	30	58	30	869	96	6.52	196.12	101.6	97.9	100.1	98.1	102.8	99.5
Q8CGY8	UDP-N-acetylglucosamine--peptide N-acetylglucosaminyltransferase 110 kDa subunit OS=Mus musculus OX=10090 GN=Ogt PE=1 SV=2	26	27	53	27	1046	116.9	6.7	180.92	98.1	101.3	99.8	100.3	101	99.6
Q99JY9	Actin-related protein 3 OS=Mus musculus OX=10090 GN=Actr3 PE=1 SV=3	50	23	87	19	418	47.3	5.88	262.19	102.5	104.8	97.9	95.8	100.9	98.1
Q60625	Intercellular adhesion molecule 5 OS=Mus musculus OX=10090 GN=Icam5 PE=1 SV=2	31	28	84	28	917	96.9	6.32	249.55	101.3	100.4	100.3	98.1	99.6	100.2
P80316	T-complex protein 1 subunit epsilon OS=Mus musculus OX=10090 GN=Cct5 PE=1 SV=1	47	27	62	26	541	59.6	6.02	212.91	100.2	102	101.1	98.6	96.9	101.1
Q8C1A5	Thimet oligopeptidase OS=Mus musculus OX=10090 GN=Thop1 PE=1 SV=1	42	30	55	29	687	78	6.06	178.55	101.7	101.8	100.7	98.7	97.4	99.6
Q9Z140	Copine-6 OS=Mus musculus OX=10090 GN=Cpne6 PE=1 SV=1	44	24	99	23	557	61.7	5.59	299.81	101	101.2	101	95.2	100.1	101.6
O88643	Serine/threonine-protein kinase PAK 1 OS=Mus musculus OX=10090 GN=Pak1 PE=1 SV=1	44	20	57	10	545	60.7	5.74	190.63	102.2	95.4	99.5	100	102.9	99.9
Q61548	Clathrin coat assembly protein AP180 OS=Mus musculus OX=10090 GN=Snap91 PE=1 SV=1	27	24	77	23	901	91.8	4.88	283.4	99.7	98.9	101.3	102.1	101.1	96.9
P17751	Triosephosphate isomerase OS=Mus musculus OX=10090 GN=Tpi1 PE=1 SV=5	81	20	150	20	249	26.7	7.3	491.08	106	101.3	96.5	98.4	100.6	97.2
P11983	T-complex protein 1 subunit alpha OS=Mus musculus OX=10090 GN=Tcp1 PE=1 SV=3	43	24	65	23	556	60.4	6.16	204.7	98.3	102	101.2	99.7	97	101.8
Q8C419	Probable G-protein coupled receptor 158 OS=Mus musculus OX=10090 GN=Gpr158 PE=1 SV=2	27	28	60	28	1200	134.3	8.09	170.13	99.5	99.3	99.6	99.6	100.9	101.1
Q9CQV8	14-3-3 protein beta/alpha OS=Mus musculus OX=10090 GN=Ywhab PE=1 SV=3	68	19	208	9	246	28.1	4.83	587.82	100.5	98.7	101.3	98.1	101.9	99.5
Q9D394	Protein RUFY3 OS=Mus musculus OX=10090 GN=Rufy3 PE=1 SV=1	58	29	64	27	469	53	5.49	208.97	99.8	101.4	99.7	99.5	97.4	102.1
Q6A065	Centrosomal protein of 170 kDa OS=Mus musculus OX=10090 GN=Cep170 PE=1 SV=2	24	35	59	34	1588	174.9	7.17	139.8	96.3	100.2	100.3	100.3	97.7	105.2
Q9R1R2	Tripartite motif-containing protein 3 OS=Mus musculus OX=10090 GN=Trim3 PE=1 SV=1	41	24	53	22	744	80.7	7.81	174.45	98	100	101.8	99.7	98.9	101.6
P30275	Creatine kinase U-type, mitochondrial OS=Mus musculus OX=10090 GN=Ckmt1 PE=1 SV=1	56	23	109	21	418	47	8.16	375.42	100.9	97.6	97.2	102.2	102.8	99.3
P50518	V-type proton ATPase subunit E 1 OS=Mus musculus OX=10090 GN=Atp6v1e1 PE=1 SV=2	58	21	124	21	226	26.1	8.43	356.2	103.4	99.9	99.1	98.4	101.8	97.4
Q91WQ3	Tyrosine--tRNA ligase, cytoplasmic OS=Mus musculus OX=10090 GN=Yars1 PE=1 SV=3	55	35	72	35	528	59.1	7.01	193.87	103.3	99.2	99.3	96.6	102.2	99.3
Q9WTS5	Teneurin-2 OS=Mus musculus OX=10090 GN=Tenm2 PE=1 SV=1	16	36	58	31	2764	306.3	6.68	175.46	93.9	97.3	103.9	102.3	97.7	104.9
P39447	Tight junction protein ZO-1 OS=Mus musculus OX=10090 GN=Tjp1 PE=1 SV=2	20	32	55	32	1745	194.6	6.64	158.29	100.1	98.4	100.9	100.6	99.9	100.2
Q9Z0J4	Nitric oxide synthase, brain OS=Mus musculus OX=10090 GN=Nos1 PE=1 SV=1	26	37	69	37	1429	160.4	7.15	190.88	102	95.8	98.3	98.9	104.2	100.8
P26043	Radixin OS=Mus musculus OX=10090 GN=Rdx PE=1 SV=3	51	39	67	25	583	68.5	6.2	177.23	101.3	100.9	99.1	97.1	98.8	102.8
G3X9J0	Signal-induced proliferation-associated 1-like protein 3 OS=Mus musculus OX=10090 GN=Sipa1l3 PE=1 SV=1	24	36	51	34	1776	194.9	8.32	130.53	97.8	106.2	103.3	93.9	98.3	100.6
Q9JKY5	Huntingtin-interacting protein 1-related protein OS=Mus musculus OX=10090 GN=Hip1r PE=1 SV=2	32	34	62	33	1068	119.4	6.52	177.83	99.2	96.8	101.3	101.7	98.3	102.7
Q7TME0	Phospholipid phosphatase-related protein type 4 OS=Mus musculus OX=10090 GN=Plppr4 PE=1 SV=2	34	24	64	24	766	83.2	8.84	196.63	98.4	101.8	101.2	97.3	99.4	101.9
Q9Z2Q6	Septin-5 OS=Mus musculus OX=10090 GN=Septin5 PE=1 SV=2	56	24	84	21	369	42.7	6.67	313.34	103.4	97.8	99	101.4	102.7	95.8
Q99K51	Plastin-3 OS=Mus musculus OX=10090 GN=Pls3 PE=1 SV=3	46	24	56	18	630	70.7	5.62	201.55	102.6	102.5	95.5	101.8	99.6	98.1
Q922B2	Aspartate--tRNA ligase, cytoplasmic OS=Mus musculus OX=10090 GN=Dars1 PE=1 SV=2	57	29	70	29	501	57.1	6.49	221.55	97.4	101.8	101	100.7	97.2	101.9
Q91YT0	NADH dehydrogenase [ubiquinone] flavoprotein 1, mitochondrial OS=Mus musculus OX=10090 GN=Ndufv1 PE=1 SV=1	54	23	85	23	464	50.8	8.21	228.25	100.6	99.2	98.7	99.5	103.2	98.8
Q8BTI8	Serine/arginine repetitive matrix protein 2 OS=Mus musculus OX=10090 GN=Srrm2 PE=1 SV=3	15	31	48	31	2703	294.7	12.03	144.11	96.6	98.6	100.7	103.3	98.6	102.2
Q91WC3	Long-chain-fatty-acid--CoA ligase 6 OS=Mus musculus OX=10090 GN=Acsl6 PE=1 SV=1	44	28	60	28	697	78	7.34	199.88	99.5	97.5	99.2	101.7	102.2	99.9
E9Q7G0	Nuclear mitotic apparatus protein 1 OS=Mus musculus OX=10090 GN=Numa1 PE=1 SV=1	19	30	47	30	2094	235.5	5.87	142.42	95	96.9	100.6	103.1	102.4	102
Q148V7	RAB11-binding protein RELCH OS=Mus musculus OX=10090 GN=Relch PE=1 SV=1	25	24	51	24	1216	134.5	5.34	187.19	97.5	99.4	101.4	100.8	101.4	99.4
Q9D415	Disks large-associated protein 1 OS=Mus musculus OX=10090 GN=Dlgap1 PE=1 SV=3	32	29	74	26	992	110.3	7.09	200.33	99.9	98	98.2	98.8	104.8	100.3
P80313	T-complex protein 1 subunit eta OS=Mus musculus OX=10090 GN=Cct7 PE=1 SV=1	55	29	51	29	544	59.6	7.84	173.25	99.4	101.9	100.9	99.3	97.1	101.4
P05201	Aspartate aminotransferase, cytoplasmic OS=Mus musculus OX=10090 GN=Got1 PE=1 SV=3	57	24	130	24	413	46.2	7.14	385.5	105.1	99.2	98	98.1	103.8	95.9
Q04690	Neurofibromin OS=Mus musculus OX=10090 GN=Nf1 PE=1 SV=1	12	35	68	35	2841	319.4	7.39	179.22	96.8	96.5	98.4	105.7	97.9	104.6
P26041	Moesin OS=Mus musculus OX=10090 GN=Msn PE=1 SV=3	47	34	73	23	577	67.7	6.6	183.91	102.3	99.5	104.4	96.9	97.3	99.7
P10649	Glutathione S-transferase Mu 1 OS=Mus musculus OX=10090 GN=Gstm1 PE=1 SV=2	71	19	113	15	218	26	7.94	317.39	102.9	97.8	101.7	98	105.7	94
Q68FF6	ARF GTPase-activating protein GIT1 OS=Mus musculus OX=10090 GN=Git1 PE=1 SV=1	36	27	70	22	770	85.2	6.93	232.95	100.6	101.1	98.8	98.6	99.3	101.7
P14152	Malate dehydrogenase, cytoplasmic OS=Mus musculus OX=10090 GN=Mdh1 PE=1 SV=3	52	21	116	21	334	36.5	6.58	334.18	104.5	100.4	98.2	98.3	101.7	96.9
P47757	F-actin-capping protein subunit beta OS=Mus musculus OX=10090 GN=Capzb PE=1 SV=3	62	19	98	19	277	31.3	5.74	268.67	101.1	102.2	99.7	97.2	101	98.8
O88447	Kinesin light chain 1 OS=Mus musculus OX=10090 GN=Klc1 PE=1 SV=3	41	24	61	15	541	61.4	5.68	224.56	99.3	99.9	98.7	101.4	99	101.7
Q8CAA7	Glucose 1,6-bisphosphate synthase OS=Mus musculus OX=10090 GN=Pgm2l1 PE=1 SV=1	40	28	67	27	621	70.2	6.49	199.82	101.1	102.6	97.8	99.5	100.5	98.4
Q60902	Epidermal growth factor receptor substrate 15-like 1 OS=Mus musculus OX=10090 GN=Eps15l1 PE=1 SV=3	29	25	55	25	907	99.2	5.02	165.87	100.9	99.8	99.5	101.1	100.3	98.4
Q68FL4	Putative adenosylhomocysteinase 3 OS=Mus musculus OX=10090 GN=Ahcyl2 PE=1 SV=1	36	26	68	9	613	66.9	7.36	205.73	103	101.2	102.1	95.7	102.7	95.3
E9Q8I9	Protein furry homolog OS=Mus musculus OX=10090 GN=Fry PE=1 SV=1	12	32	43	32	3020	338.9	6.01	118.58	96.3	101.2	98.7	103.9	96	103.9
Q7TMK9	Heterogeneous nuclear ribonucleoprotein Q OS=Mus musculus OX=10090 GN=Syncrip PE=1 SV=2	39	21	62	21	623	69.6	8.59	220.71	96.7	103.1	101.5	102.5	95.5	100.7
A2ASQ1	Agrin OS=Mus musculus OX=10090 GN=Agrn PE=1 SV=1	18	25	38	25	1950	207.4	6.32	118.49	98.8	97.1	99.8	99.9	102.9	101.6
Q9D0K2	Succinyl-CoA:3-ketoacid coenzyme A transferase 1, mitochondrial OS=Mus musculus OX=10090 GN=Oxct1 PE=1 SV=1	46	19	72	19	520	56	8.53	195.82	94.9	105.8	100.9	103.3	93.4	101.8
P84075	Neuron-specific calcium-binding protein hippocalcin OS=Mus musculus OX=10090 GN=Hpca PE=1 SV=2	74	19	123	8	193	22.4	4.97	287.98	99.4	104.9	99.9	96.7	96.1	103
Q9Z2W9	Glutamate receptor 3 OS=Mus musculus OX=10090 GN=Gria3 PE=1 SV=2	28	28	60	22	888	100.5	8.38	193.44	98.7	102.3	101.9	98.8	98.8	99.4
Q8BG05	Heterogeneous nuclear ribonucleoprotein A3 OS=Mus musculus OX=10090 GN=Hnrnpa3 PE=1 SV=1	49	25	102	20	379	39.6	9.01	297.9	99.2	101.7	102.1	104.5	95.5	97
Q9DB05	Alpha-soluble NSF attachment protein OS=Mus musculus OX=10090 GN=Napa PE=1 SV=1	69	18	75	14	295	33.2	5.45	293.27	99.5	100.8	100.6	98.4	101.8	98.9
Q7TPH6	E3 ubiquitin-protein ligase MYCBP2 OS=Mus musculus OX=10090 GN=Mycbp2 PE=1 SV=3	9	41	54	41	4749	520.9	7.09	112.14	98.3	101.1	98.1	100.8	98.2	103.6
Q8BIK4	Dedicator of cytokinesis protein 9 OS=Mus musculus OX=10090 GN=Dock9 PE=1 SV=2	16	37	52	34	2055	235.2	7.25	138.02	99.5	99.8	100.6	99.5	96.3	104.3
P53810	Phosphatidylinositol transfer protein alpha isoform OS=Mus musculus OX=10090 GN=Pitpna PE=1 SV=2	70	28	92	25	271	31.9	6.37	289.04	100.7	99.6	101.1	99.9	100.7	98
Q8BMS1	Trifunctional enzyme subunit alpha, mitochondrial OS=Mus musculus OX=10090 GN=Hadha PE=1 SV=1	41	28	60	28	763	82.6	9.14	194.84	101.1	98.4	101.9	98.5	101.1	98.9
Q9Z1G3	V-type proton ATPase subunit C 1 OS=Mus musculus OX=10090 GN=Atp6v1c1 PE=1 SV=4	52	28	87	28	382	43.9	7.46	244.05	102.4	99.7	98.9	97.2	99.4	102.6
O08749	Dihydrolipoyl dehydrogenase, mitochondrial OS=Mus musculus OX=10090 GN=Dld PE=1 SV=2	44	21	70	21	509	54.2	7.9	230.2	101.5	99.5	97.2	99.9	104.5	97.4
Q5RJI5	Serine/threonine-protein kinase BRSK1 OS=Mus musculus OX=10090 GN=Brsk1 PE=1 SV=1	44	31	59	22	778	85.1	9.32	161.47	96.1	99.5	101.6	103.4	97.4	102
P35438	Glutamate receptor ionotropic, NMDA 1 OS=Mus musculus OX=10090 GN=Grin1 PE=1 SV=1	25	31	69	31	938	105.4	8.84	191.16	99.9	103.8	99.9	97.6	100	98.9
Q9QUR6	Prolyl endopeptidase OS=Mus musculus OX=10090 GN=Prep PE=1 SV=1	42	25	51	25	710	80.7	5.73	160.51	95.9	100.7	102.4	100.8	96.3	103.9
P51881	ADP/ATP translocase 2 OS=Mus musculus OX=10090 GN=Slc25a5 PE=1 SV=3	61	23	160	14	298	32.9	9.73	401.98	98.3	100.8	97.7	103.1	103.2	97
Q91YM2	Rho GTPase-activating protein 35 OS=Mus musculus OX=10090 GN=Arhgap35 PE=1 SV=3	20	29	49	29	1499	170.3	6.61	155.49	97.7	98.3	100.1	100.1	100.5	103.3
P62874	Guanine nucleotide-binding protein G(I)/G(S)/G(T) subunit beta-1 OS=Mus musculus OX=10090 GN=Gnb1 PE=1 SV=3	61	15	87	9	340	37.4	6	338.27	102	97.1	101.2	99.6	102.6	97.5
Q9Z2I0	Mitochondrial proton/calcium exchanger protein OS=Mus musculus OX=10090 GN=Letm1 PE=1 SV=1	34	25	56	25	738	82.9	6.52	168.91	99.2	99.5	100.4	101.1	101.5	98.3
Q9DBF1	Alpha-aminoadipic semialdehyde dehydrogenase OS=Mus musculus OX=10090 GN=Aldh7a1 PE=1 SV=4	45	21	64	21	539	58.8	7.47	216.93	102.2	97.7	100.9	99.9	101.5	97.8
Q6VNB8	WD repeat and FYVE domain-containing protein 3 OS=Mus musculus OX=10090 GN=Wdfy3 PE=1 SV=1	12	36	53	36	3508	392.1	6.8	135	96.5	98.6	98.2	100.1	101.8	104.8
Q8VD04	GRIP1-associated protein 1 OS=Mus musculus OX=10090 GN=Gripap1 PE=1 SV=1	38	28	51	28	806	92.7	5.25	154.91	98.1	100.1	97.6	100.8	99.6	103.9
Q8VIJ6	Splicing factor, proline- and glutamine-rich OS=Mus musculus OX=10090 GN=Sfpq PE=1 SV=1	30	26	77	24	699	75.4	9.44	221.23	95.8	101.3	101.8	101.9	95.7	103.5
Q8BWF0	Succinate-semialdehyde dehydrogenase, mitochondrial OS=Mus musculus OX=10090 GN=Aldh5a1 PE=1 SV=1	45	20	49	20	523	55.9	8.25	198.86	101.5	98.8	97.5	101.1	101.8	99.5
Q80TZ3	Putative tyrosine-protein phosphatase auxilin OS=Mus musculus OX=10090 GN=Dnajc6 PE=1 SV=2	30	27	58	24	938	102.2	7.23	183.86	101.4	99.6	100.7	98.5	101.2	98.5
Q9JLN9	Serine/threonine-protein kinase mTOR OS=Mus musculus OX=10090 GN=Mtor PE=1 SV=2	14	35	45	35	2549	288.6	7.17	138.87	97.9	97.8	99.4	101	103.3	100.7
Q61696	Heat shock 70 kDa protein 1A OS=Mus musculus OX=10090 GN=Hspa1a PE=1 SV=2	41	24	77	16	641	70	5.72	248.08	103.1	90.2	119.7	79.5	120.4	87.1
P18760	Cofilin-1 OS=Mus musculus OX=10090 GN=Cfl1 PE=1 SV=3	89	21	118	18	166	18.5	8.09	360.24	101.5	103.5	100.5	99.2	95.8	99.5
P61161	Actin-related protein 2 OS=Mus musculus OX=10090 GN=Actr2 PE=1 SV=1	49	21	77	20	394	44.7	6.74	272.74	100.1	104.9	99	97	100.7	98.3
Q05816	Fatty acid-binding protein 5 OS=Mus musculus OX=10090 GN=Fabp5 PE=1 SV=3	77	13	76	13	135	15.1	6.54	333.31	98.7	102	100.2	99.7	98.4	101.1
Q6A4J8	Ubiquitin carboxyl-terminal hydrolase 7 OS=Mus musculus OX=10090 GN=Usp7 PE=1 SV=1	24	29	46	29	1103	128.4	5.5	142.9	100.4	99.7	101.1	100.6	98.6	99.6
Q80YN3	Breast carcinoma-amplified sequence 1 homolog OS=Mus musculus OX=10090 GN=Bcas1 PE=1 SV=3	39	23	83	23	633	67.3	6.21	244.9	110.8	90.8	96	93.6	100.9	107.8
P99029	Peroxiredoxin-5, mitochondrial OS=Mus musculus OX=10090 GN=Prdx5 PE=1 SV=2	63	13	69	13	210	21.9	8.85	259.44	102.3	99.3	99.2	98.2	103.2	97.9
Q9EPU0	Regulator of nonsense transcripts 1 OS=Mus musculus OX=10090 GN=Upf1 PE=1 SV=2	31	30	46	30	1124	123.9	6.61	151.61	99.1	100.5	101.2	101	98.5	99.8
Q5DTL9	Sodium-driven chloride bicarbonate exchanger OS=Mus musculus OX=10090 GN=Slc4a10 PE=1 SV=2	23	24	56	18	1118	125.7	6.51	168.79	99.2	99.6	102.5	101.3	101.2	96.2
Q8BHN3	Neutral alpha-glucosidase AB OS=Mus musculus OX=10090 GN=Ganab PE=1 SV=1	28	29	53	28	944	106.8	6.06	173.92	97.6	101.5	102.3	100.5	97.7	100.5
Q9D819	Inorganic pyrophosphatase OS=Mus musculus OX=10090 GN=Ppa1 PE=1 SV=1	72	21	64	21	289	32.6	5.6	230.15	97.5	101.8	103.4	100.2	97.7	99.4
P51830	Adenylate cyclase type 9 OS=Mus musculus OX=10090 GN=Adcy9 PE=1 SV=1	23	27	53	27	1353	150.9	7.21	173.02	100.8	99.6	97.8	97.9	103.5	100.5
P62821	Ras-related protein Rab-1A OS=Mus musculus OX=10090 GN=Rab1A PE=1 SV=3	90	18	91	9	205	22.7	6.21	291.38	101.7	101	100.3	99.1	100.3	97.6
Q61315	Adenomatous polyposis coli protein OS=Mus musculus OX=10090 GN=Apc PE=1 SV=1	13	38	53	38	2845	310.9	7.58	111.92	98.6	98.1	100	100.5	100.1	102.6
P29341	Polyadenylate-binding protein 1 OS=Mus musculus OX=10090 GN=Pabpc1 PE=1 SV=2	35	26	62	26	636	70.6	9.5	210.88	98	102.6	101.5	99.7	95.3	103
Q8K596	Sodium/calcium exchanger 2 OS=Mus musculus OX=10090 GN=Slc8a2 PE=1 SV=1	23	18	77	18	921	100.6	5.12	280.11	100.1	104	98.4	97.8	100	99.7
Q8BMF4	Dihydrolipoyllysine-residue acetyltransferase component of pyruvate dehydrogenase complex, mitochondrial OS=Mus musculus OX=10090 GN=Dlat PE=1 SV=2	29	17	74	17	642	67.9	8.57	246.97	103.1	97.6	99	100.3	104	96
Q9CZ13	Cytochrome b-c1 complex subunit 1, mitochondrial OS=Mus musculus OX=10090 GN=Uqcrc1 PE=1 SV=2	45	19	76	18	480	52.8	6.21	278.99	102.3	100.2	98.9	99.8	101.1	97.8
Q62318	Transcription intermediary factor 1-beta OS=Mus musculus OX=10090 GN=Trim28 PE=1 SV=3	38	27	59	27	834	88.8	5.77	193.29	95.7	101.7	101.2	103.4	96.1	101.9
Q8BWT1	3-ketoacyl-CoA thiolase, mitochondrial OS=Mus musculus OX=10090 GN=Acaa2 PE=1 SV=3	62	19	43	19	397	41.8	8.09	191.01	99.9	100.3	105.3	99.2	97	98.4
P21619	Lamin-B2 OS=Mus musculus OX=10090 GN=Lmnb2 PE=1 SV=2	53	32	61	28	596	67.3	5.5	181.31	101.6	98.4	99.8	100.7	102.2	97.3
P61979	Heterogeneous nuclear ribonucleoprotein K OS=Mus musculus OX=10090 GN=Hnrnpk PE=1 SV=1	45	19	84	19	463	50.9	5.54	239.21	99.8	101.9	102.2	102.8	94.3	99
Q8BUV3	Gephyrin OS=Mus musculus OX=10090 GN=Gphn PE=1 SV=2	32	24	60	24	769	83.2	5.6	182.55	100.6	100.9	98.9	98.3	101.7	99.6
Q9ES28	Rho guanine nucleotide exchange factor 7 OS=Mus musculus OX=10090 GN=Arhgef7 PE=1 SV=2	28	24	49	21	862	97	6.8	145.92	98.4	101.6	100.9	97.8	100.5	100.8
Q61361	Brevican core protein OS=Mus musculus OX=10090 GN=Bcan PE=1 SV=2	32	28	82	27	883	95.8	4.93	246.63	105.4	98.8	98.3	97.1	104.1	96.2
Q99KJ8	Dynactin subunit 2 OS=Mus musculus OX=10090 GN=Dctn2 PE=1 SV=3	63	24	57	24	402	44.1	5.26	205.61	103.1	99.3	100.2	98.9	97.9	100.6
Q02357	Ankyrin-1 OS=Mus musculus OX=10090 GN=Ank1 PE=1 SV=2	19	32	53	28	1862	204.1	6.55	164.3	102.2	96.4	101.2	99.3	101.5	99.4
Q9CR16	Peptidyl-prolyl cis-trans isomerase D OS=Mus musculus OX=10090 GN=Ppid PE=1 SV=3	57	24	56	22	370	40.7	7.43	183.72	98.8	99.6	100.6	97.1	105.6	98.2
Q3UH66	Serine/threonine-protein kinase WNK2 OS=Mus musculus OX=10090 GN=Wnk2 PE=1 SV=2	18	28	45	23	2149	227.4	5.91	119.82	100.7	98.8	98.4	101.8	99.2	101.2
Q80U63	Mitofusin-2 OS=Mus musculus OX=10090 GN=Mfn2 PE=1 SV=3	26	23	63	22	757	86.1	6.77	214.55	98.4	99.3	98.4	99.1	104.4	100.3
P37040	NADPH--cytochrome P450 reductase OS=Mus musculus OX=10090 GN=Por PE=1 SV=2	37	25	66	25	678	77	5.53	184.57	100.1	100.5	99.6	100.1	98.7	101
P12970	60S ribosomal protein L7a OS=Mus musculus OX=10090 GN=Rpl7a PE=1 SV=2	52	19	49	19	266	30	10.56	169.39	92.1	104.3	102.2	104.4	96.7	100.2
O88448	Kinesin light chain 2 OS=Mus musculus OX=10090 GN=Klc2 PE=1 SV=1	39	22	44	14	599	66.6	7.21	148.82	101.3	98.2	100	102.8	96.6	101.1
A2AWA9	Rab GTPase-activating protein 1 OS=Mus musculus OX=10090 GN=Rabgap1 PE=1 SV=1	29	34	60	32	1064	120.7	5.25	154.68	97.1	101.2	99.5	100.5	99.9	101.8
P56564	Excitatory amino acid transporter 1 OS=Mus musculus OX=10090 GN=Slc1a3 PE=1 SV=2	21	11	75	10	543	59.6	8.4	307.82	99.3	98.1	99.4	100.8	105.1	97.3
P06151	L-lactate dehydrogenase A chain OS=Mus musculus OX=10090 GN=Ldha PE=1 SV=3	46	21	104	20	332	36.5	7.74	340.68	98.5	100.2	103.1	100.1	99.6	98.4
P46471	26S proteasome regulatory subunit 7 OS=Mus musculus OX=10090 GN=Psmc2 PE=1 SV=5	58	22	59	22	433	48.6	5.95	199.3	100.1	101.8	101.3	99.9	95.8	101.1
Q9D0R2	Threonine--tRNA ligase 1, cytoplasmic OS=Mus musculus OX=10090 GN=Tars1 PE=1 SV=2	36	26	49	25	722	83.3	7.36	144.48	97.7	101.9	101.9	99.2	98.3	100.9
Q58A65	C-Jun-amino-terminal kinase-interacting protein 4 OS=Mus musculus OX=10090 GN=Spag9 PE=1 SV=2	24	32	57	23	1321	146.1	5.15	143.61	97.6	98.3	99.7	100.9	101.9	101.7
O54991	Contactin-associated protein 1 OS=Mus musculus OX=10090 GN=Cntnap1 PE=1 SV=2	23	27	73	27	1385	156.2	7.06	218.42	101	98.6	97.9	101.7	99.6	101.2
Q9JLB0	Protein PALS2 OS=Mus musculus OX=10090 GN=Pals2 PE=1 SV=1	48	30	71	29	553	62.6	6.4	197.47	101.4	99	98.9	103	101.2	96.5
Q9WTX6	Cullin-1 OS=Mus musculus OX=10090 GN=Cul1 PE=1 SV=1	40	33	59	33	776	89.6	8	154.56	100.4	101.5	99.4	102.7	95.8	100.2
P48453	Serine/threonine-protein phosphatase 2B catalytic subunit beta isoform OS=Mus musculus OX=10090 GN=Ppp3cb PE=1 SV=2	32	17	114	10	525	59.1	5.91	363.08	98.6	99.7	99.7	98.9	102.7	100.4
Q3UM45	Protein phosphatase 1 regulatory subunit 7 OS=Mus musculus OX=10090 GN=Ppp1r7 PE=1 SV=2	55	21	63	21	361	41.3	4.92	191.11	101.7	100.8	99	99.1	101.8	97.7
P0DP27	Calmodulin-2 OS=Mus musculus OX=10090 GN=Calm2 PE=1 SV=1	60	13	195	13	149	16.8	4.22	602.37	100.3	100.5	99.9	101.8	95.6	102
Q3UU96	Serine/threonine-protein kinase MRCK alpha OS=Mus musculus OX=10090 GN=Cdc42bpa PE=1 SV=2	20	32	50	28	1719	195.4	6.51	151.17	95.1	100.7	103	99.5	98.1	103.6
P47738	Aldehyde dehydrogenase, mitochondrial OS=Mus musculus OX=10090 GN=Aldh2 PE=1 SV=1	44	22	51	21	519	56.5	7.62	190.1	103.3	100.3	101.5	95.1	101.2	98.6
Q9JKR6	Hypoxia up-regulated protein 1 OS=Mus musculus OX=10090 GN=Hyou1 PE=1 SV=1	28	28	60	28	999	111.1	5.19	157.35	99.2	98.7	104.7	100.3	99.9	97.2
B9EKR1	Receptor-type tyrosine-protein phosphatase zeta OS=Mus musculus OX=10090 GN=Ptprz1 PE=1 SV=1	9	21	58	20	2312	254.2	4.88	176.7	99	98.7	107	100.4	99.5	95.4
P32921	Tryptophan--tRNA ligase, cytoplasmic OS=Mus musculus OX=10090 GN=Wars1 PE=1 SV=2	39	19	54	19	481	54.3	6.89	170.78	101.4	99.6	100.2	97.4	102.5	99
Q9D8N0	Elongation factor 1-gamma OS=Mus musculus OX=10090 GN=Eef1g PE=1 SV=3	36	22	84	22	437	50	6.74	275.3	97.7	102.1	103.3	101.5	95.7	99.7
Q80Y24	Prickle-like protein 2 OS=Mus musculus OX=10090 GN=Prickle2 PE=1 SV=3	40	28	56	28	845	95.7	7.27	178.8	97.7	102.2	101.1	100	96.7	102.2
P63011	Ras-related protein Rab-3A OS=Mus musculus OX=10090 GN=Rab3a PE=1 SV=1	63	13	105	8	220	25	5.03	358.06	102.5	101.4	96.7	101.5	102.5	95.4
P70399	TP53-binding protein 1 OS=Mus musculus OX=10090 GN=Tp53bp1 PE=1 SV=3	19	25	43	25	1969	212.6	4.63	118.57	95.2	100.6	98	101	100.7	104.6
Q64511	DNA topoisomerase 2-beta OS=Mus musculus OX=10090 GN=Top2b PE=1 SV=2	19	33	57	33	1612	181.8	8.29	156.11	95.3	103.1	103.3	103.6	93.7	100.9
Q9D0I9	Arginine--tRNA ligase, cytoplasmic OS=Mus musculus OX=10090 GN=Rars1 PE=1 SV=2	37	24	45	24	660	75.6	7.55	147.3	98.1	98.7	99.9	99.6	101.1	102.5
Q61490	CD166 antigen OS=Mus musculus OX=10090 GN=Alcam PE=1 SV=3	35	23	46	23	583	65.1	6.15	148.55	94.6	99.8	100.9	101.5	104.6	98.5
O89053	Coronin-1A OS=Mus musculus OX=10090 GN=Coro1a PE=1 SV=5	42	24	91	24	461	51	6.48	252.41	102.3	100.6	98.5	97.3	102.9	98.4
P70207	Plexin-A2 OS=Mus musculus OX=10090 GN=Plxna2 PE=1 SV=2	15	29	53	12	1894	211.4	6.54	169.13	97.4	97.4	102.7	102.4	101.1	99.1
Q61036	Serine/threonine-protein kinase PAK 3 OS=Mus musculus OX=10090 GN=Pak3 PE=1 SV=2	41	20	56	9	559	62.4	5.4	192.44	100.2	99.3	101.7	99.7	99.2	100
Q99PU5	Long-chain-fatty-acid--CoA ligase ACSBG1 OS=Mus musculus OX=10090 GN=Acsbg1 PE=1 SV=1	33	21	58	21	721	80.4	5.94	226.82	95.1	102.7	100.4	104	97.4	100.3
O35136	Neural cell adhesion molecule 2 OS=Mus musculus OX=10090 GN=Ncam2 PE=1 SV=1	31	27	59	27	837	93.1	6.07	178.48	98.9	94.8	99.7	107.7	101.6	97.2
Q9DC07	LIM zinc-binding domain-containing Nebulette OS=Mus musculus OX=10090 GN=Nebl PE=1 SV=1	68	18	46	16	270	31.1	8.31	162.17	105	99.9	96.9	95.7	104.4	98
Q7TSC1	Protein PRRC2A OS=Mus musculus OX=10090 GN=Prrc2a PE=1 SV=1	18	30	63	27	2158	229.1	9.39	126.88	96.2	101.8	105	101.3	93.5	102.2
O55029	Coatomer subunit beta' OS=Mus musculus OX=10090 GN=Copb2 PE=1 SV=2	33	26	51	26	905	102.4	5.3	160.89	96.7	102.5	103.4	101	94.7	101.8
Q99NB9	Splicing factor 3B subunit 1 OS=Mus musculus OX=10090 GN=Sf3b1 PE=1 SV=1	25	27	43	27	1304	145.7	7.09	138.13	94.8	101.8	101.8	103.6	96.4	101.6
P21279	Guanine nucleotide-binding protein G(q) subunit alpha OS=Mus musculus OX=10090 GN=Gnaq PE=1 SV=4	47	19	78	13	359	42.1	5.68	256.52	101.5	101.3	100.7	99.1	98.7	98.7
Q8BU30	Isoleucine--tRNA ligase, cytoplasmic OS=Mus musculus OX=10090 GN=Iars1 PE=1 SV=2	21	29	61	29	1262	144.2	6.55	184.1	96.5	98.3	101.3	99.6	97.2	107.2
Q8BKC5	Importin-5 OS=Mus musculus OX=10090 GN=Ipo5 PE=1 SV=3	20	21	56	20	1097	123.5	4.93	201.22	99	101.7	100.5	99.4	99.9	99.6
Q60598	Src substrate cortactin OS=Mus musculus OX=10090 GN=Cttn PE=1 SV=2	40	26	76	26	546	61.2	5.4	228.81	101.9	102.9	99.2	96.9	99.8	99.3
Q9WV34	MAGUK p55 subfamily member 2 OS=Mus musculus OX=10090 GN=Mpp2 PE=1 SV=1	47	25	62	24	552	61.5	6.44	202.13	100.7	98.5	96.7	99.1	103.5	101.5
Q8JZQ9	Eukaryotic translation initiation factor 3 subunit B OS=Mus musculus OX=10090 GN=Eif3b PE=1 SV=1	29	23	72	23	803	91.3	5.02	219.47	97.4	102.1	102.6	100.4	96.5	101
Q6DFV3	Rho GTPase-activating protein 21 OS=Mus musculus OX=10090 GN=Arhgap21 PE=1 SV=1	17	29	45	29	1944	215.6	7.64	125.85	100.5	97.6	100.8	98.7	100.9	101.5
Q9CPY7	Cytosol aminopeptidase OS=Mus musculus OX=10090 GN=Lap3 PE=1 SV=3	44	20	59	20	519	56.1	7.72	199.26	101.6	95.8	96.2	97.1	109.9	99.3
Q8BMJ2	Leucine--tRNA ligase, cytoplasmic OS=Mus musculus OX=10090 GN=Lars1 PE=1 SV=2	24	26	53	26	1178	134.1	7.05	155.91	100.8	98.8	98.9	101.1	99.6	100.8
Q925I1	ATPase family AAA domain-containing protein 3 OS=Mus musculus OX=10090 GN=Atad3 PE=1 SV=1	43	27	62	27	591	66.7	9.29	193.99	97.4	100.3	99.9	101.4	101.7	99.3
Q61792	LIM and SH3 domain protein 1 OS=Mus musculus OX=10090 GN=Lasp1 PE=1 SV=1	60	20	85	18	263	30	7.05	229.09	101.4	100.4	99.8	101.3	99	98.1
Q6P5E4	UDP-glucose:glycoprotein glucosyltransferase 1 OS=Mus musculus OX=10090 GN=Uggt1 PE=1 SV=4	18	27	48	27	1551	176.3	5.62	141.4	95.6	101.1	102.4	101.2	96.9	102.8
Q9CVB6	Actin-related protein 2/3 complex subunit 2 OS=Mus musculus OX=10090 GN=Arpc2 PE=1 SV=3	47	18	59	18	300	34.3	7.36	191.97	100.5	103.5	100.6	97.8	99.9	97.7
Q62095	ATP-dependent RNA helicase DDX3Y OS=Mus musculus OX=10090 GN=Ddx3y PE=1 SV=2	41	25	59	2	658	73.4	7.53	158.55	119.5	128.5	26.4	154.2	29.1	142.2
P10630	Eukaryotic initiation factor 4A-II OS=Mus musculus OX=10090 GN=Eif4a2 PE=1 SV=2	55	24	71	10	407	46.4	5.48	234.18	96.2	103	101.6	104.3	94.5	100.4
Q61543	Golgi apparatus protein 1 OS=Mus musculus OX=10090 GN=Glg1 PE=1 SV=1	27	31	58	31	1175	133.6	6.84	162.99	96.4	101.3	102.2	102.8	96	101.3
Q6PFD5	Disks large-associated protein 3 OS=Mus musculus OX=10090 GN=Dlgap3 PE=1 SV=1	35	29	55	28	977	105.8	8.76	164.65	103	98.6	99.2	98.5	101.5	99.2
O35382	Exocyst complex component 4 OS=Mus musculus OX=10090 GN=Exoc4 PE=1 SV=2	24	22	55	22	975	110.5	6.49	167.18	98.8	99.4	99	99.3	103	100.5
Q64331	Unconventional myosin-VI OS=Mus musculus OX=10090 GN=Myo6 PE=1 SV=1	21	30	43	29	1265	146.3	8.85	113.56	101.8	99.4	99.3	99.9	101.3	98.3
Q8CJ19	[F-actin]-monooxygenase MICAL3 OS=Mus musculus OX=10090 GN=Mical3 PE=1 SV=2	17	36	50	36	1993	223.6	5.47	115.16	101	98.3	98.8	99.4	102.8	99.8
Q99K48	Non-POU domain-containing octamer-binding protein OS=Mus musculus OX=10090 GN=Nono PE=1 SV=3	43	23	74	20	473	54.5	8.95	208.88	97.2	103.3	99	102.9	95.8	101.8
Q9D0F9	Phosphoglucomutase-1 OS=Mus musculus OX=10090 GN=Pgm1 PE=1 SV=4	43	24	53	24	562	61.4	6.57	158.45	102.2	99.1	98.5	97.4	106.3	96.5
Q9JIS5	Synaptic vesicle glycoprotein 2A OS=Mus musculus OX=10090 GN=Sv2a PE=1 SV=1	21	19	103	18	742	82.6	5.57	320.3	101.1	99	97.6	100.7	104.9	96.7
Q8BGD9	Eukaryotic translation initiation factor 4B OS=Mus musculus OX=10090 GN=Eif4b PE=1 SV=1	43	29	71	29	611	68.8	5.67	185.24	99.9	100.2	101.2	98.4	96.2	104.1
P70232	Neural cell adhesion molecule L1-like protein OS=Mus musculus OX=10090 GN=Chl1 PE=1 SV=2	25	24	43	24	1209	135	5.57	152.15	96	100.4	103.5	102.3	97.9	99.9
P13707	Glycerol-3-phosphate dehydrogenase [NAD(+)], cytoplasmic OS=Mus musculus OX=10090 GN=Gpd1 PE=1 SV=3	64	24	63	22	349	37.5	7.17	181.22	112.7	94	93.8	91.9	114	93.7
Q91WD5	NADH dehydrogenase [ubiquinone] iron-sulfur protein 2, mitochondrial OS=Mus musculus OX=10090 GN=Ndufs2 PE=1 SV=1	47	19	83	19	463	52.6	6.99	259.68	98.7	99.8	97.2	104	100.9	99.5
Q3B7Z2	Oxysterol-binding protein 1 OS=Mus musculus OX=10090 GN=Osbp PE=1 SV=3	35	23	48	22	805	88.7	7.2	156.48	96.5	100.1	101.1	97.9	101.4	103.1
Q8CH77	Neuron navigator 1 OS=Mus musculus OX=10090 GN=Nav1 PE=1 SV=2	17	30	40	29	1875	202.2	8.06	111.89	89.4	101.4	102	101.1	99.5	106.7
Q9Z1Z0	General vesicular transport factor p115 OS=Mus musculus OX=10090 GN=Uso1 PE=1 SV=2	30	25	61	25	959	106.9	4.93	206.97	98.1	102.1	101.8	99.3	97.4	101.4
P97300	Neuroplastin OS=Mus musculus OX=10090 GN=Nptn PE=1 SV=3	40	18	85	18	397	44.3	7.74	239.24	99.3	102.1	99.6	99.3	101.8	97.9
B1AWN6	Sodium channel protein type 2 subunit alpha OS=Mus musculus OX=10090 GN=Scn2a PE=1 SV=1	12	24	57	14	2006	227.8	5.67	178.57	99.9	98.4	99.4	97.4	103.9	101.1
O55042	Alpha-synuclein OS=Mus musculus OX=10090 GN=Snca PE=1 SV=2	61	11	89	8	140	14.5	4.77	375.94	99.7	99	100.7	95.3	99.8	105.5
Q9WUA2	Phenylalanine--tRNA ligase beta subunit OS=Mus musculus OX=10090 GN=Farsb PE=1 SV=2	45	27	58	27	589	65.7	7.12	182.13	98.1	102.7	103.1	101.7	94.4	100.1
Q7TPD3	Roundabout homolog 2 OS=Mus musculus OX=10090 GN=Robo2 PE=1 SV=2	23	26	46	25	1470	161.1	6.33	141.04	96.4	104.9	101	98.3	97.3	102.1
Q9CZD3	Glycine--tRNA ligase OS=Mus musculus OX=10090 GN=Gars1 PE=1 SV=1	32	26	59	26	729	81.8	6.65	176.89	98.8	97.8	101.1	99.7	101.5	101.1
P62192	26S proteasome regulatory subunit 4 OS=Mus musculus OX=10090 GN=Psmc1 PE=1 SV=1	54	25	64	23	440	49.2	6.21	161.74	99.3	100.7	100.8	100.2	98.5	100.5
Q80WJ7	Protein LYRIC OS=Mus musculus OX=10090 GN=Mtdh PE=1 SV=1	42	22	41	22	579	63.8	9.33	112.93	96	101.8	101.4	105.1	95.2	100.4
Q80TR1	Adhesion G protein-coupled receptor L1 OS=Mus musculus OX=10090 GN=Adgrl1 PE=1 SV=2	18	22	43	22	1466	161.6	6.48	133.53	97.7	102.1	103.8	98.6	99.3	98.6
P10852	4F2 cell-surface antigen heavy chain OS=Mus musculus OX=10090 GN=Slc3a2 PE=1 SV=1	37	20	56	20	526	58.3	5.91	200.95	102.4	97.4	98.5	100.4	105.2	96.2
Q9D5V5	Cullin-5 OS=Mus musculus OX=10090 GN=Cul5 PE=1 SV=3	27	24	49	24	780	90.9	7.81	149.26	98.3	100	100.5	97.7	101.6	102.1
P02468	Laminin subunit gamma-1 OS=Mus musculus OX=10090 GN=Lamc1 PE=1 SV=2	22	30	51	30	1607	177.2	5.21	139.09	93.6	96.7	101.8	112.9	96.6	98.4
A2AQ25	Sickle tail protein OS=Mus musculus OX=10090 GN=Skt PE=1 SV=1	17	32	55	32	1946	212.9	7.77	150.69	101	96	96.9	106.3	100.7	99.1
Q8CC35	Synaptopodin OS=Mus musculus OX=10090 GN=Synpo PE=1 SV=2	33	19	51	19	929	99.5	9.42	185.93	104.9	97.4	97.7	97.6	103.6	98.8
P63330	Serine/threonine-protein phosphatase 2A catalytic subunit alpha isoform OS=Mus musculus OX=10090 GN=Ppp2ca PE=1 SV=1	60	15	72	2	309	35.6	5.54	282.68	100.9	101.3	98.5	100.4	99.1	99.8
B1AZP2	Disks large-associated protein 4 OS=Mus musculus OX=10090 GN=Dlgap4 PE=1 SV=1	28	24	60	23	992	108	7.08	176.3	98.1	100	102.4	97.6	101.6	100.2
Q9CW03	Structural maintenance of chromosomes protein 3 OS=Mus musculus OX=10090 GN=Smc3 PE=1 SV=2	25	30	51	29	1217	141.5	7.18	136.16	98	99.7	98.8	105.1	97.8	100.5
Q8BH66	Atlastin-1 OS=Mus musculus OX=10090 GN=Atl1 PE=1 SV=1	32	20	68	19	558	63.3	6.49	206.27	100.2	101.1	101.2	101.4	96.5	99.7
Q9R1Q8	Transgelin-3 OS=Mus musculus OX=10090 GN=Tagln3 PE=1 SV=1	75	14	72	11	199	22.5	7.33	216.13	99.4	98.4	99.9	103.4	96.7	102.2
Q9D2V7	Coronin-7 OS=Mus musculus OX=10090 GN=Coro7 PE=1 SV=2	27	21	35	21	922	100.7	5.77	134.24	99.4	101.7	100.3	97.8	99	101.9
O70589	Peripheral plasma membrane protein CASK OS=Mus musculus OX=10090 GN=Cask PE=1 SV=2	27	24	48	24	926	105	6.43	178.54	96.8	100.7	98.7	102.3	103.3	98.3
Q9ESN9	C-Jun-amino-terminal kinase-interacting protein 3 OS=Mus musculus OX=10090 GN=Mapk8ip3 PE=1 SV=1	25	32	45	23	1337	147.5	5.45	102.64	95	97.5	101.5	97.3	107.7	100.8
Q5SXY1	Cytospin-B OS=Mus musculus OX=10090 GN=Specc1 PE=1 SV=2	29	27	48	26	1067	118	6.64	136.59	99.3	98	101.6	97	103	101.1
Q60930	Voltage-dependent anion-selective channel protein 2 OS=Mus musculus OX=10090 GN=Vdac2 PE=1 SV=2	64	16	92	15	295	31.7	7.49	323.36	101.5	100.5	97.8	99.2	103.3	97.7
Q9ESN6	Tripartite motif-containing protein 2 OS=Mus musculus OX=10090 GN=Trim2 PE=1 SV=1	25	18	44	16	744	81.4	6.96	167.9	98.7	97.3	100.7	97.4	103.9	102
Q01097	Glutamate receptor ionotropic, NMDA 2B OS=Mus musculus OX=10090 GN=Grin2b PE=1 SV=3	18	25	73	23	1482	165.9	6.87	227.03	100.3	104.7	99.6	98.4	98.5	98.5
P02088	Hemoglobin subunit beta-1 OS=Mus musculus OX=10090 GN=Hbb-b1 PE=1 SV=2	82	12	65	5	147	15.8	7.65	261.04	61.1	60.5	191.4	164.2	59.8	63.1
P24527	Leukotriene A-4 hydrolase OS=Mus musculus OX=10090 GN=Lta4h PE=1 SV=4	42	22	57	22	611	69	6.42	203.89	98.8	104.5	103.9	96.5	99.7	96.6
Q8CIB5	Fermitin family homolog 2 OS=Mus musculus OX=10090 GN=Fermt2 PE=1 SV=1	30	20	48	20	680	77.8	6.7	168.68	96.8	98.5	100.6	101.5	101.3	101.4
P62823	Ras-related protein Rab-3C OS=Mus musculus OX=10090 GN=Rab3c PE=1 SV=1	54	11	90	7	227	25.9	5.24	259.66	101.9	102.7	96	105	101.1	93.2
Q8C1B1	Calmodulin-regulated spectrin-associated protein 2 OS=Mus musculus OX=10090 GN=Camsap2 PE=1 SV=3	22	31	54	30	1461	164.2	6.86	121.64	97.8	99	101.3	100.2	98.8	102.9
O08917	Flotillin-1 OS=Mus musculus OX=10090 GN=Flot1 PE=1 SV=1	52	21	48	21	428	47.5	7.15	161.91	101.4	100.6	102.4	98.1	97.6	99.8
P80317	T-complex protein 1 subunit zeta OS=Mus musculus OX=10090 GN=Cct6a PE=1 SV=3	45	24	51	21	531	58	7.08	158.67	97.6	102.2	101.4	99.8	97	102
Q9JKK7	Tropomodulin-2 OS=Mus musculus OX=10090 GN=Tmod2 PE=1 SV=2	55	21	59	18	351	39.5	5.35	212.56	102	100.3	100.2	97.7	100.4	99.4
Q60931	Voltage-dependent anion-selective channel protein 3 OS=Mus musculus OX=10090 GN=Vdac3 PE=1 SV=1	48	15	60	13	283	30.7	8.79	199.51	100.3	102.8	97.9	101	99.4	98.7
Q8BFZ3	Beta-actin-like protein 2 OS=Mus musculus OX=10090 GN=Actbl2 PE=1 SV=1	29	14	252	1	376	42	5.49	879.14	35	137.1	106.8	147.4	102.9	70.8
Q9CQA3	Succinate dehydrogenase [ubiquinone] iron-sulfur subunit, mitochondrial OS=Mus musculus OX=10090 GN=Sdhb PE=1 SV=1	60	19	61	19	282	31.8	8.68	168.78	101.5	99.3	99.4	102.2	98.8	98.9
Q3UH68	LIM and calponin homology domains-containing protein 1 OS=Mus musculus OX=10090 GN=Limch1 PE=1 SV=2	29	25	32	25	1057	118.1	5.48	92.89	100	94.5	102	99.6	103.7	100.3
P30416	Peptidyl-prolyl cis-trans isomerase FKBP4 OS=Mus musculus OX=10090 GN=Fkbp4 PE=1 SV=5	51	25	52	25	458	51.5	5.72	170.77	95.6	100.4	101.4	99.3	102.4	100.9
Q3UTJ2	Sorbin and SH3 domain-containing protein 2 OS=Mus musculus OX=10090 GN=Sorbs2 PE=1 SV=2	23	26	48	25	1180	132.3	8.53	150.2	100.8	96.5	97.9	98.5	105.9	100.3
P62715	Serine/threonine-protein phosphatase 2A catalytic subunit beta isoform OS=Mus musculus OX=10090 GN=Ppp2cb PE=1 SV=1	55	14	71	1	309	35.6	5.43	278.76	97	105.3	98.4	93.6	101.4	104.3
Q80VC9	Calmodulin-regulated spectrin-associated protein 3 OS=Mus musculus OX=10090 GN=Camsap3 PE=1 SV=1	27	28	41	26	1252	135.1	8.43	113.64	94.3	100.6	101.4	100.1	102.1	101.5
Q60676	Serine/threonine-protein phosphatase 5 OS=Mus musculus OX=10090 GN=Ppp5c PE=1 SV=3	46	24	62	24	499	56.8	6.2	190.1	102.4	100.9	100	98.4	99.8	98.4
Q99K85	Phosphoserine aminotransferase OS=Mus musculus OX=10090 GN=Psat1 PE=1 SV=1	59	22	53	22	370	40.4	8.03	161.53	104.4	99.5	96.2	97.2	101.2	101.4
P70296	Phosphatidylethanolamine-binding protein 1 OS=Mus musculus OX=10090 GN=Pebp1 PE=1 SV=3	93	12	78	12	187	20.8	5.4	299.11	105.7	101.6	99.3	92.9	100.2	100.3
Q9R1P4	Proteasome subunit alpha type-1 OS=Mus musculus OX=10090 GN=Psma1 PE=1 SV=1	58	17	57	17	263	29.5	6.46	197.09	99.8	103.1	99.1	100	96.6	101.4
A2A690	Protein TANC2 OS=Mus musculus OX=10090 GN=Tanc2 PE=1 SV=1	16	27	52	26	1994	220.1	7.97	145.51	99.9	99.4	100.7	101.6	99.8	98.6
Q61753	D-3-phosphoglycerate dehydrogenase OS=Mus musculus OX=10090 GN=Phgdh PE=1 SV=3	32	16	59	16	533	56.5	6.54	220.29	101.6	99.2	101.5	97	101.4	99.3
Q80X90	Filamin-B OS=Mus musculus OX=10090 GN=Flnb PE=1 SV=3	13	28	37	25	2602	277.7	5.71	98.2	99.6	94.8	102.6	102.7	97.3	103
Q8K212	Phosphofurin acidic cluster sorting protein 1 OS=Mus musculus OX=10090 GN=Pacs1 PE=1 SV=2	27	24	49	24	961	104.8	7.74	156.65	100.3	99.3	100.3	102	98.6	99.5
Q9D8E6	60S ribosomal protein L4 OS=Mus musculus OX=10090 GN=Rpl4 PE=1 SV=3	46	22	60	22	419	47.1	11	171.02	96.9	102.4	102.3	102.6	95.4	100.4
Q99LC3	NADH dehydrogenase [ubiquinone] 1 alpha subcomplex subunit 10, mitochondrial OS=Mus musculus OX=10090 GN=Ndufa10 PE=1 SV=1	37	18	66	18	355	40.6	7.78	192.48	101.2	99.4	97.4	100	102.7	99.2
O88544	COP9 signalosome complex subunit 4 OS=Mus musculus OX=10090 GN=Cops4 PE=1 SV=1	58	20	53	20	406	46.3	5.83	203.7	100.4	98.4	101.7	97.5	103.3	98.7
Q62419	Endophilin-A2 OS=Mus musculus OX=10090 GN=Sh3gl1 PE=1 SV=1	55	24	77	16	368	41.5	5.72	189.21	104.2	100.8	99.3	96.5	101.5	97.7
Q07076	Annexin A7 OS=Mus musculus OX=10090 GN=Anxa7 PE=1 SV=2	37	20	65	20	463	49.9	6.18	174.67	105	97.3	95.9	97.1	106.9	97.9
Q91V41	Ras-related protein Rab-14 OS=Mus musculus OX=10090 GN=Rab14 PE=1 SV=3	79	15	62	14	215	23.9	6.21	231.09	100	100.7	100.8	99.4	100.5	98.6
Q9EPJ9	ADP-ribosylation factor GTPase-activating protein 1 OS=Mus musculus OX=10090 GN=Arfgap1 PE=1 SV=2	46	17	53	17	414	45.3	5.57	155.39	101.7	99.4	100.9	102	98.3	97.8
Q3UPL0	Protein transport protein Sec31A OS=Mus musculus OX=10090 GN=Sec31a PE=1 SV=2	21	27	37	27	1230	133.5	6.76	125.94	96.8	103.4	101.9	102.6	95.4	99.8
Q03141	MAP/microtubule affinity-regulating kinase 3 OS=Mus musculus OX=10090 GN=Mark3 PE=1 SV=2	31	25	55	15	753	84.3	9.51	144.33	97.3	101.3	101.6	101.2	99.4	99.3
Q9QYG0	Protein NDRG2 OS=Mus musculus OX=10090 GN=Ndrg2 PE=1 SV=1	51	13	73	13	371	40.8	5.4	231.66	102.6	98.8	100.9	99	101.5	97.2
P68040	Receptor of activated protein C kinase 1 OS=Mus musculus OX=10090 GN=Rack1 PE=1 SV=3	65	19	52	19	317	35.1	7.69	187.32	97.3	101.3	104.3	101.1	95.1	100.8
Q8VD37	SH3-containing GRB2-like protein 3-interacting protein 1 OS=Mus musculus OX=10090 GN=Sgip1 PE=1 SV=1	32	21	60	21	806	86	7.87	233.74	101.5	98.2	98.4	100.1	103.2	98.6
O08759	Ubiquitin-protein ligase E3A OS=Mus musculus OX=10090 GN=Ube3a PE=1 SV=2	28	22	48	22	870	99.8	5.08	155.25	96.5	101.5	102.5	100.1	95.2	104.2
Q8R1Q8	Cytoplasmic dynein 1 light intermediate chain 1 OS=Mus musculus OX=10090 GN=Dync1li1 PE=1 SV=1	50	21	61	21	523	56.6	6.42	194.77	98.1	100.3	101.8	101	99.2	99.5
Q9CZS1	Aldehyde dehydrogenase X, mitochondrial OS=Mus musculus OX=10090 GN=Aldh1b1 PE=1 SV=1	40	22	42	21	519	57.5	7.02	154.91	97.1	102.9	102.6	100.8	97.2	99.4
Q8BJ42	Disks large-associated protein 2 OS=Mus musculus OX=10090 GN=Dlgap2 PE=1 SV=2	25	23	58	20	1059	119	6.81	165.63	98.3	98.5	98.7	101.3	102.5	100.7
Q5DQR4	Syntaxin-binding protein 5-like OS=Mus musculus OX=10090 GN=Stxbp5l PE=1 SV=1	23	20	52	19	1185	131.8	6.86	151.94	102.7	99.8	98.5	98.1	99.9	101.1
P50247	Adenosylhomocysteinase OS=Mus musculus OX=10090 GN=Ahcy PE=1 SV=3	47	19	39	17	432	47.7	6.54	131.33	101.7	98.9	98.9	98.2	103.2	99.2
P27612	Phospholipase A-2-activating protein OS=Mus musculus OX=10090 GN=Plaa PE=1 SV=4	35	22	36	22	794	87.2	6.14	116.28	97.4	100	100.2	103.1	97.2	102.2
Q9Z1Z2	Serine-threonine kinase receptor-associated protein OS=Mus musculus OX=10090 GN=Strap PE=1 SV=2	49	14	51	14	350	38.4	5.12	195.48	96.4	100.4	101.8	102.5	96.9	101.9
Q8BUK6	Protein Hook homolog 3 OS=Mus musculus OX=10090 GN=Hook3 PE=1 SV=2	31	24	37	24	718	83.2	5.19	117.73	98.1	99.8	100.9	100.8	98.4	101.9
P60843	Eukaryotic initiation factor 4A-I OS=Mus musculus OX=10090 GN=Eif4a1 PE=1 SV=1	47	22	62	8	406	46.1	5.48	193.72	96.2	103.5	102.6	104.4	92.6	100.8
Q01405	Protein transport protein Sec23A OS=Mus musculus OX=10090 GN=Sec23a PE=1 SV=2	29	20	42	20	765	86.1	7.08	146.13	94.2	99.5	104.4	101.4	98.1	102.4
Q91YQ5	Dolichyl-diphosphooligosaccharide--protein glycosyltransferase subunit 1 OS=Mus musculus OX=10090 GN=Rpn1 PE=1 SV=1	40	26	47	26	608	68.5	6.46	149.01	98.2	101.5	103.7	100.6	95.5	100.6
Q9ERK4	Exportin-2 OS=Mus musculus OX=10090 GN=Cse1l PE=1 SV=1	22	22	49	22	971	110.4	5.77	149.63	97.8	101.7	101.3	101.8	99.6	97.8
O35685	Nuclear migration protein nudC OS=Mus musculus OX=10090 GN=Nudc PE=1 SV=1	48	20	45	20	332	38.3	5.26	137.62	97.1	101.7	102.6	99.6	98.2	100.8
P48774	Glutathione S-transferase Mu 5 OS=Mus musculus OX=10090 GN=Gstm5 PE=1 SV=1	56	17	63	16	224	26.6	7.21	179.91	104	99.6	95.9	98.8	104.1	97.6
P59281	Rho GTPase-activating protein 39 OS=Mus musculus OX=10090 GN=Arhgap39 PE=1 SV=2	26	26	43	26	1107	125.1	7.97	130.45	96.9	100.8	101.7	98.1	99.7	102.8
Q6NVE8	WD repeat-containing protein 44 OS=Mus musculus OX=10090 GN=Wdr44 PE=1 SV=1	29	20	38	20	915	101.5	5.24	122.59	98.6	100.1	102.6	98.8	99	101
Q8K3H0	DCC-interacting protein 13-alpha OS=Mus musculus OX=10090 GN=Appl1 PE=1 SV=1	42	22	55	21	707	79.3	5.41	181.87	98.8	98	101	98.9	101.6	101.6
P28271	Cytoplasmic aconitate hydratase OS=Mus musculus OX=10090 GN=Aco1 PE=1 SV=3	32	28	53	27	889	98.1	7.5	161.55	98.6	101.7	100.8	99.6	98.9	100.4
Q8BGT8	Phytanoyl-CoA hydroxylase-interacting protein-like OS=Mus musculus OX=10090 GN=Phyhipl PE=1 SV=1	49	20	88	17	375	42.3	6.35	288.39	100.7	100	101.1	99.2	98.3	100.7
P55012	Solute carrier family 12 member 2 OS=Mus musculus OX=10090 GN=Slc12a2 PE=1 SV=2	21	21	39	21	1205	131	7.33	147.53	106.3	98.2	102.7	90.1	102	100.8
Q9D4H8	Cullin-2 OS=Mus musculus OX=10090 GN=Cul2 PE=1 SV=2	37	27	60	27	745	86.8	7.01	179.13	100.5	100.2	100.1	100.4	99.4	99.4
P46097	Synaptotagmin-2 OS=Mus musculus OX=10090 GN=Syt2 PE=1 SV=1	38	17	56	8	422	47.2	7.99	168.26	106	91.9	98.5	110.6	106.7	86.3
Q8JZN5	Complex I assembly factor ACAD9, mitochondrial OS=Mus musculus OX=10090 GN=Acad9 PE=1 SV=2	30	23	48	23	625	68.7	7.46	158.22	99	100.6	102.9	104.6	93.5	99.3
Q8BNW9	Kelch repeat and BTB domain-containing protein 11 OS=Mus musculus OX=10090 GN=Kbtbd11 PE=1 SV=3	46	21	50	21	633	67.9	5.39	164.59	102.3	100.6	97.9	98.9	102.4	98
O88343	Electrogenic sodium bicarbonate cotransporter 1 OS=Mus musculus OX=10090 GN=Slc4a4 PE=1 SV=2	20	23	69	22	1079	121.4	6.84	192.3	99.1	98.7	101.9	98.6	106.2	95.5
Q8VDQ8	NAD-dependent protein deacetylase sirtuin-2 OS=Mus musculus OX=10090 GN=Sirt2 PE=1 SV=2	54	20	55	20	389	43.2	5.35	194.4	115.3	89.4	91.7	90.6	105.4	107.5
P63005	Platelet-activating factor acetylhydrolase IB subunit beta OS=Mus musculus OX=10090 GN=Pafah1b1 PE=1 SV=2	54	21	59	20	410	46.6	7.37	177.7	100.2	100.2	100	102.3	97.4	99.9
P51150	Ras-related protein Rab-7a OS=Mus musculus OX=10090 GN=Rab7a PE=1 SV=2	71	15	44	15	207	23.5	6.7	153.22	97.7	101.1	99.9	99	102	100.3
Q6ZQK5	Arf-GAP with coiled-coil, ANK repeat and PH domain-containing protein 2 OS=Mus musculus OX=10090 GN=Acap2 PE=1 SV=2	34	23	36	23	770	87.2	6.68	110.2	100.8	102.6	99.1	97.7	98.4	101.3
Q8BLK3	Limbic system-associated membrane protein OS=Mus musculus OX=10090 GN=Lsamp PE=1 SV=1	49	17	69	16	341	38.1	6.65	257.28	99.6	99	98.5	99.2	103	100.7
Q923T9	Calcium/calmodulin-dependent protein kinase type II subunit gamma OS=Mus musculus OX=10090 GN=Camk2g PE=1 SV=1	33	17	87	10	529	59.6	7.58	282.65	98.8	98.9	95	107.4	100.3	99.4
Q99JY0	Trifunctional enzyme subunit beta, mitochondrial OS=Mus musculus OX=10090 GN=Hadhb PE=1 SV=1	42	18	56	17	475	51.4	9.38	173.19	101.2	98.7	100.7	99.1	101	99.3
P49312	Heterogeneous nuclear ribonucleoprotein A1 OS=Mus musculus OX=10090 GN=Hnrnpa1 PE=1 SV=2	61	22	68	15	320	34.2	9.23	211.99	94.1	102.2	105.5	104	90.9	103.2
P61205	ADP-ribosylation factor 3 OS=Mus musculus OX=10090 GN=Arf3 PE=2 SV=2	67	13	60	2	181	20.6	7.43	217.73	98.7	101.5	101.1	100.1	99.8	98.8
O35526	Syntaxin-1A OS=Mus musculus OX=10090 GN=Stx1a PE=1 SV=3	65	20	59	16	288	33	5.24	194.95	103.7	96.2	98.2	100.6	104.6	96.7
Q9D172	Glutamine amidotransferase-like class 1 domain-containing protein 3, mitochondrial OS=Mus musculus OX=10090 GN=Gatd3 PE=1 SV=1	50	12	52	12	266	28.1	8.78	218.69	104.7	98.1	99	98.5	103.8	95.8
Q3THK7	GMP synthase [glutamine-hydrolyzing] OS=Mus musculus OX=10090 GN=Gmps PE=1 SV=2	35	23	43	23	693	76.7	6.73	135.72	98.5	98.2	101.5	100.5	101.5	99.9
O54983	Ketimine reductase mu-crystallin OS=Mus musculus OX=10090 GN=Crym PE=1 SV=1	44	15	87	15	313	33.5	5.67	311.59	101.9	100.3	100	96.4	97.7	103.7
Q80XN0	D-beta-hydroxybutyrate dehydrogenase, mitochondrial OS=Mus musculus OX=10090 GN=Bdh1 PE=1 SV=2	42	15	67	15	343	38.3	9.01	193.66	97.5	103.8	101.9	103.1	93.6	100.1
O55106	Striatin OS=Mus musculus OX=10090 GN=Strn PE=1 SV=2	39	24	52	22	780	85.9	5.27	157.98	98.9	99.2	101.7	98.8	97.8	103.6
Q80UJ7	Rab3 GTPase-activating protein catalytic subunit OS=Mus musculus OX=10090 GN=Rab3gap1 PE=1 SV=4	27	25	49	25	981	110.1	5.73	158.92	98.4	99.5	100.6	99.4	99.9	102.2
P54775	26S proteasome regulatory subunit 6B OS=Mus musculus OX=10090 GN=Psmc4 PE=1 SV=2	44	20	46	19	418	47.4	5.21	151.92	96.9	100.7	101.6	101.1	96.3	103.3
Q9Z2D6	Methyl-CpG-binding protein 2 OS=Mus musculus OX=10090 GN=Mecp2 PE=1 SV=1	43	20	45	20	484	52.3	9.96	152.17	99.6	98.9	101.8	101.7	101.6	96.3
P31324	cAMP-dependent protein kinase type II-beta regulatory subunit OS=Mus musculus OX=10090 GN=Prkar2b PE=1 SV=3	45	17	53	14	416	46.1	4.98	192.94	101.2	97.1	98.1	107.8	101.3	94.7
Q62351	Transferrin receptor protein 1 OS=Mus musculus OX=10090 GN=Tfrc PE=1 SV=1	31	23	52	23	763	85.7	6.57	163.25	92.1	105.4	101.2	102.7	95.6	103
Q9CZU6	Citrate synthase, mitochondrial OS=Mus musculus OX=10090 GN=Cs PE=1 SV=1	34	16	131	16	464	51.7	8.57	314.16	100.9	100.9	99.9	101.3	101.1	95.9
O55023	Inositol monophosphatase 1 OS=Mus musculus OX=10090 GN=Impa1 PE=1 SV=1	55	17	45	17	277	30.4	5.19	139.01	103	101.4	99.5	96.7	100.8	98.7
Q6ZPQ6	Membrane-associated phosphatidylinositol transfer protein 2 OS=Mus musculus OX=10090 GN=Pitpnm2 PE=1 SV=2	17	19	41	18	1335	147.9	7.93	129.42	101.8	100.7	97.9	98.5	101.9	99.2
Q9DCX2	ATP synthase subunit d, mitochondrial OS=Mus musculus OX=10090 GN=Atp5pd PE=1 SV=3	91	17	78	17	161	18.7	5.69	265.8	101	100.1	99.1	98.9	100.4	100.4
Q9Z0X1	Apoptosis-inducing factor 1, mitochondrial OS=Mus musculus OX=10090 GN=Aifm1 PE=1 SV=1	33	20	49	20	612	66.7	9.17	165.56	99	100.1	101.4	99.8	99.8	99.9
Q91WG7	Diacylglycerol kinase gamma OS=Mus musculus OX=10090 GN=Dgkg PE=1 SV=1	35	24	44	23	788	88.5	6.76	144	100.1	99	98.6	97.8	100.6	104
Q8CIN4	Serine/threonine-protein kinase PAK 2 OS=Mus musculus OX=10090 GN=Pak2 PE=1 SV=1	40	16	37	9	524	57.9	5.77	120.08	98.4	99.5	102.9	99.7	96.1	103.4
O35954	Membrane-associated phosphatidylinositol transfer protein 1 OS=Mus musculus OX=10090 GN=Pitpnm1 PE=1 SV=1	30	25	36	24	1243	134.9	6.06	114.95	98.8	99.1	100.1	101.4	98.3	102.2
Q8R4U7	Leucine zipper protein 1 OS=Mus musculus OX=10090 GN=Luzp1 PE=1 SV=2	30	28	36	28	1068	119.2	7.99	94.59	104.1	99.6	97.6	98.9	97.8	102
Q8C0M9	Isoaspartyl peptidase/L-asparaginase OS=Mus musculus OX=10090 GN=Asrgl1 PE=1 SV=1	51	16	49	16	326	33.9	7.65	174.01	105	96.5	99	98	102.6	98.9
P16014	Secretogranin-1 OS=Mus musculus OX=10090 GN=Chgb PE=1 SV=2	36	26	51	26	677	77.9	5.07	115.89	96.5	103.8	97.3	99.2	95.4	107.7
Q80UP3	Diacylglycerol kinase zeta OS=Mus musculus OX=10090 GN=Dgkz PE=1 SV=2	27	24	50	21	929	104	8.09	132.39	98.9	105	100	97.9	98.2	100
P54071	Isocitrate dehydrogenase [NADP], mitochondrial OS=Mus musculus OX=10090 GN=Idh2 PE=1 SV=3	39	22	44	21	452	50.9	8.69	142.52	101	98.3	101.9	99.4	99.8	99.5
Q8BPM0	Disheveled-associated activator of morphogenesis 1 OS=Mus musculus OX=10090 GN=Daam1 PE=1 SV=4	25	29	51	27	1077	123.3	7.46	128.15	99.5	98.5	100.8	95.7	103.8	101.7
Q8CDG3	Deubiquitinating protein VCPIP1 OS=Mus musculus OX=10090 GN=Vcpip1 PE=1 SV=1	20	25	36	25	1220	134.4	7.17	118	94.3	97.1	95.2	102.2	103.6	107.6
P50580	Proliferation-associated protein 2G4 OS=Mus musculus OX=10090 GN=Pa2g4 PE=1 SV=3	50	21	61	21	394	43.7	6.86	216.7	96.3	102.2	103.9	101.2	95.1	101.3
Q9WTT4	V-type proton ATPase subunit G 2 OS=Mus musculus OX=10090 GN=Atp6v1g2 PE=1 SV=1	61	10	79	10	118	13.6	10.26	225.39	102.6	98.8	99.4	97.1	100.2	102
P51660	Peroxisomal multifunctional enzyme type 2 OS=Mus musculus OX=10090 GN=Hsd17b4 PE=1 SV=3	38	24	53	24	735	79.4	8.57	176.34	101.4	99.7	101.6	99.6	97.2	100.5
P08752	Guanine nucleotide-binding protein G(i) subunit alpha-2 OS=Mus musculus OX=10090 GN=Gnai2 PE=1 SV=5	60	18	64	9	355	40.5	5.45	207.06	104.3	97	99.2	98.3	103.8	97.4
P43277	Histone H1.3 OS=Mus musculus OX=10090 GN=H1-3 PE=1 SV=2	57	22	68	4	221	22.1	11.03	185.97	100.9	96.7	98.7	99.9	105.7	98.1
P33175	Kinesin heavy chain isoform 5A OS=Mus musculus OX=10090 GN=Kif5a PE=1 SV=3	27	24	58	11	1027	116.9	5.94	148.96	97.5	98.8	94.9	104.1	100.2	104.5
Q9JLC8	Sacsin OS=Mus musculus OX=10090 GN=Sacs PE=1 SV=2	7	32	40	32	4582	520.4	7.11	89.57	97.8	97.6	102.2	99.5	101.1	101.8
Q6PGN3	Serine/threonine-protein kinase DCLK2 OS=Mus musculus OX=10090 GN=Dclk2 PE=1 SV=1	31	20	40	19	756	82.9	8.44	118.24	97.4	100.9	99.4	100.3	99.7	102.3
Q9CPV4	Glyoxalase domain-containing protein 4 OS=Mus musculus OX=10090 GN=Glod4 PE=1 SV=1	56	19	46	19	298	33.3	5.47	151.6	104.5	96.9	96.8	97.3	104.6	100
O88738	Baculoviral IAP repeat-containing protein 6 OS=Mus musculus OX=10090 GN=Birc6 PE=1 SV=2	7	26	36	26	4882	531.8	6.07	102.76	96	101.7	100.2	99.4	99.2	103.5
Q9CQN1	Heat shock protein 75 kDa, mitochondrial OS=Mus musculus OX=10090 GN=Trap1 PE=1 SV=1	34	25	50	24	706	80.2	6.68	133.84	95.7	100.7	103	100.4	97.1	103.1
P35436	Glutamate receptor ionotropic, NMDA 2A OS=Mus musculus OX=10090 GN=Grin2a PE=1 SV=2	17	23	46	21	1464	165.3	7.01	135.91	101.6	103	97.6	96.1	101.3	100.4
Q7TNM2	Tripartite motif-containing protein 46 OS=Mus musculus OX=10090 GN=Trim46 PE=1 SV=1	33	20	38	20	759	83.4	7.65	127.81	95.1	97.6	105.6	98.7	98.1	105
Q9WV60	Glycogen synthase kinase-3 beta OS=Mus musculus OX=10090 GN=Gsk3b PE=1 SV=2	47	18	51	11	420	46.7	8.78	138.76	96.7	102.7	100.2	103.2	96.7	100.4
Q9WUM4	Coronin-1C OS=Mus musculus OX=10090 GN=Coro1c PE=1 SV=2	38	23	51	22	474	53.1	7.08	133.68	103.1	99.8	98.1	104	97.6	97.3
Q6PAR5	GTPase-activating protein and VPS9 domain-containing protein 1 OS=Mus musculus OX=10090 GN=Gapvd1 PE=1 SV=2	18	22	37	22	1458	162.3	5.19	111.44	98.4	99.6	103.3	98.6	98	102
Q9QWY8	Arf-GAP with SH3 domain, ANK repeat and PH domain-containing protein 1 OS=Mus musculus OX=10090 GN=Asap1 PE=1 SV=2	23	22	34	21	1147	127.3	7.64	110.97	99.4	100.1	97.9	104.3	103	95.2
Q8R4H2	Rho guanine nucleotide exchange factor 12 OS=Mus musculus OX=10090 GN=Arhgef12 PE=1 SV=2	20	25	44	24	1543	172.2	5.74	118.26	95.8	98.7	102.5	100.3	98.4	104.3
Q68FL6	Methionine--tRNA ligase, cytoplasmic OS=Mus musculus OX=10090 GN=Mars1 PE=1 SV=1	27	24	42	24	902	101.4	7.14	138.88	102.6	98.3	101	99.4	99.6	99.1
P0C7L0	WAS/WASL-interacting protein family member 3 OS=Mus musculus OX=10090 GN=Wipf3 PE=1 SV=1	50	18	46	18	485	49.4	10.18	147.71	99.2	108.5	96.3	94.9	99.8	101.4
Q68FH0	Plakophilin-4 OS=Mus musculus OX=10090 GN=Pkp4 PE=1 SV=1	23	27	57	23	1190	131.5	8.94	152.77	99	99.8	98.9	98.8	100.7	102.7
Q99N28	Cell adhesion molecule 3 OS=Mus musculus OX=10090 GN=Cadm3 PE=1 SV=1	39	13	51	13	396	42.9	5.8	195.57	98.2	95.7	97.1	99.8	105.9	103.4
Q80UG5	Septin-9 OS=Mus musculus OX=10090 GN=Septin9 PE=1 SV=1	39	22	57	22	583	65.5	8.9	179.37	103.1	96.2	98.1	100.8	104.4	97.4
Q9R0P9	Ubiquitin carboxyl-terminal hydrolase isozyme L1 OS=Mus musculus OX=10090 GN=Uchl1 PE=1 SV=1	66	15	71	15	223	24.8	5.24	226.49	102.4	99	102.5	100.1	92.8	103.2
Q9WVK4	EH domain-containing protein 1 OS=Mus musculus OX=10090 GN=Ehd1 PE=1 SV=1	43	20	44	13	534	60.6	6.83	137.39	98.9	100.2	101.5	97.4	101.5	100.6
Q9D6J6	NADH dehydrogenase [ubiquinone] flavoprotein 2, mitochondrial OS=Mus musculus OX=10090 GN=Ndufv2 PE=1 SV=2	53	12	61	12	248	27.3	7.4	221.39	99.3	97.8	99.6	100.1	102.3	101
Q3UHC7	Disabled homolog 2-interacting protein OS=Mus musculus OX=10090 GN=Dab2ip PE=1 SV=1	21	28	50	22	1189	131.6	8.72	139.26	96.1	102	102.8	101.4	97.5	100.3
P62880	Guanine nucleotide-binding protein G(I)/G(S)/G(T) subunit beta-2 OS=Mus musculus OX=10090 GN=Gnb2 PE=1 SV=3	54	14	76	5	340	37.3	6	271.22	103.4	102.3	99.4	98.2	100.2	96.6
Q9Z1S5	Neuronal-specific septin-3 OS=Mus musculus OX=10090 GN=Septin3 PE=1 SV=2	45	17	51	17	350	40	6.81	158.47	102.4	98.9	98.1	101.8	102	96.8
Q9Z1L5	Voltage-dependent calcium channel subunit alpha-2/delta-3 OS=Mus musculus OX=10090 GN=Cacna2d3 PE=1 SV=1	18	19	45	19	1091	122.7	5.73	151.91	99.4	101.9	99.5	100.6	100.8	97.9
P97315	Cysteine and glycine-rich protein 1 OS=Mus musculus OX=10090 GN=Csrp1 PE=1 SV=3	73	15	42	15	193	20.6	8.57	172.84	108.2	93.3	96.5	94.6	108.6	98.9
P62748	Hippocalcin-like protein 1 OS=Mus musculus OX=10090 GN=Hpcal1 PE=1 SV=2	72	15	93	5	193	22.3	5.5	198.61	99.5	94.1	99.8	102.4	103.8	100.3
Q9QUP5	Hyaluronan and proteoglycan link protein 1 OS=Mus musculus OX=10090 GN=Hapln1 PE=1 SV=1	58	19	49	18	356	40.5	7.8	161.5	98.4	101.7	98	98.8	103.7	99.4
Q9JMA1	Ubiquitin carboxyl-terminal hydrolase 14 OS=Mus musculus OX=10090 GN=Usp14 PE=1 SV=3	35	19	48	19	493	56	5.24	165.28	101.8	99.9	99.3	100.8	97.3	101
O88532	Zinc finger RNA-binding protein OS=Mus musculus OX=10090 GN=Zfr PE=1 SV=2	27	23	39	23	1074	116.8	9.04	117.33	93.1	100.3	98.1	104.8	101.7	102
Q8K400	Syntaxin-binding protein 5 OS=Mus musculus OX=10090 GN=Stxbp5 PE=1 SV=3	22	20	45	19	1152	127.6	7.21	157.97	99.7	100.6	100.8	98.2	99.7	100.9
Q64516	Glycerol kinase OS=Mus musculus OX=10090 GN=Gk PE=1 SV=2	32	18	46	17	559	61.2	5.87	156.59	101	100.3	96.6	100.7	103.2	98.1
P53994	Ras-related protein Rab-2A OS=Mus musculus OX=10090 GN=Rab2a PE=1 SV=1	67	13	50	7	212	23.5	6.54	181.04	99.6	102.6	101.5	101.3	94	101
Q3V3R1	Monofunctional C1-tetrahydrofolate synthase, mitochondrial OS=Mus musculus OX=10090 GN=Mthfd1l PE=1 SV=2	25	23	49	22	977	105.7	7.02	147.39	99.4	97.7	102.9	98.6	102	99.5
Q9D2G2	Dihydrolipoyllysine-residue succinyltransferase component of 2-oxoglutarate dehydrogenase complex, mitochondrial OS=Mus musculus OX=10090 GN=Dlst PE=1 SV=1	39	17	79	17	454	49	8.95	217.1	100.9	99.2	98.6	100	104.8	96.5
E9Q7X7	Neurexin-2 OS=Mus musculus OX=10090 GN=Nrxn2 PE=1 SV=1	14	22	37	17	1710	184.8	5.9	103.98	96.2	101.1	102.4	102.2	99.4	98.6
Q9DCW4	Electron transfer flavoprotein subunit beta OS=Mus musculus OX=10090 GN=Etfb PE=1 SV=3	58	15	42	15	255	27.6	8.1	166.8	103.8	100.3	99.4	98	97.2	101.3
P54227	Stathmin OS=Mus musculus OX=10090 GN=Stmn1 PE=1 SV=2	82	19	53	15	149	17.3	5.97	144.62	103.3	95.2	100.2	103.3	96.6	101.2
Q6P5U7	NACHT and WD repeat domain-containing protein 2 OS=Mus musculus OX=10090 GN=Nwd2 PE=1 SV=2	17	24	33	24	1742	197.3	6.15	106.8	98.7	99.7	100.8	99.7	100.4	100.6
Q8VHJ5	Serine/threonine-protein kinase MARK1 OS=Mus musculus OX=10090 GN=Mark1 PE=1 SV=2	29	22	31	13	795	88.3	9.39	98.16	97.9	99.5	99	100.4	100.5	102.7
P08226	Apolipoprotein E OS=Mus musculus OX=10090 GN=Apoe PE=1 SV=2	55	22	60	22	311	35.8	5.68	165.16	101.1	96.6	98.8	99.3	106.8	97.4
Q8R5H6	Wiskott-Aldrich syndrome protein family member 1 OS=Mus musculus OX=10090 GN=Wasf1 PE=1 SV=2	32	18	60	14	559	61.5	6.37	178.73	98	101.3	100.6	97.7	100.1	102.3
Q9CWJ9	Bifunctional purine biosynthesis protein ATIC OS=Mus musculus OX=10090 GN=Atic PE=1 SV=2	38	20	49	20	592	64.2	6.76	167.19	100.8	98.6	98.2	99.9	101.9	100.5
Q9WV80	Sorting nexin-1 OS=Mus musculus OX=10090 GN=Snx1 PE=1 SV=1	36	18	29	17	522	58.9	5.22	103.61	98.8	98.9	101.6	100.5	98.8	101.3
Q9DCD0	6-phosphogluconate dehydrogenase, decarboxylating OS=Mus musculus OX=10090 GN=Pgd PE=1 SV=3	41	19	44	19	483	53.2	7.23	120.04	102.9	100.7	101.6	100.8	93.6	100.4
Q9Z2Y3	Homer protein homolog 1 OS=Mus musculus OX=10090 GN=Homer1 PE=1 SV=2	49	19	49	18	366	41.4	5.53	161.43	102.2	100.1	98.8	98.2	101.3	99.4
Q61941	NAD(P) transhydrogenase, mitochondrial OS=Mus musculus OX=10090 GN=Nnt PE=1 SV=2	22	23	39	23	1086	113.8	7.64	110.37	101.2	99.2	98.4	97.3	104.3	99.5
Q8CGF6	WD repeat-containing protein 47 OS=Mus musculus OX=10090 GN=Wdr47 PE=1 SV=2	23	20	50	20	920	102.2	5.97	165.23	97.5	101	105.7	99.6	96.2	100.1
Q3TEA8	Heterochromatin protein 1-binding protein 3 OS=Mus musculus OX=10090 GN=Hp1bp3 PE=1 SV=1	40	27	57	27	554	60.8	9.7	129.88	95.6	102.1	100.9	104.1	99.9	97.4
Q6A0A9	Constitutive coactivator of PPAR-gamma-like protein 1 OS=Mus musculus OX=10090 GN=FAM120A PE=1 SV=2	19	18	37	16	1112	121.6	8.92	126.54	95.5	102.6	100.9	102.9	96.4	101.8
O35129	Prohibitin-2 OS=Mus musculus OX=10090 GN=Phb2 PE=1 SV=1	59	21	69	21	299	33.3	9.83	216.11	100.1	101.6	99.2	101.1	99.2	98.8
Q9JJK2	LanC-like protein 2 OS=Mus musculus OX=10090 GN=Lancl2 PE=1 SV=1	39	15	42	15	450	50.7	7.28	141.11	101.7	94.6	97.9	102.3	104.1	99.5
Q62059	Versican core protein OS=Mus musculus OX=10090 GN=Vcan PE=1 SV=2	7	20	39	20	3357	366.6	4.64	117.26	103	98.2	98.4	92.7	106.4	101.2
Q03517	Secretogranin-2 OS=Mus musculus OX=10090 GN=Scg2 PE=1 SV=1	38	20	51	20	617	70.6	4.75	149.31	97.3	100.6	104.3	103.3	87.9	106.6
Q9D1G1	Ras-related protein Rab-1B OS=Mus musculus OX=10090 GN=Rab1b PE=1 SV=1	78	15	64	6	201	22.2	5.73	201.69	100.6	101.1	98.6	99	97.2	103.5
P58774	Tropomyosin beta chain OS=Mus musculus OX=10090 GN=Tpm2 PE=1 SV=1	60	24	67	6	284	32.8	4.7	178.98	122.4	97.1	93	93.8	101.3	92.4
Q9D051	Pyruvate dehydrogenase E1 component subunit beta, mitochondrial OS=Mus musculus OX=10090 GN=Pdhb PE=1 SV=1	50	13	63	13	359	38.9	6.87	227.65	100.4	99.9	99.6	99.8	101.6	98.7
Q9JIF7	Coatomer subunit beta OS=Mus musculus OX=10090 GN=Copb1 PE=1 SV=1	23	20	44	20	953	107	6	142.46	95.3	101.4	105	101.1	97.2	100
F8VPU2	FERM, ARHGEF and pleckstrin domain-containing protein 1 OS=Mus musculus OX=10090 GN=Farp1 PE=1 SV=1	27	25	44	25	1048	118.8	7.88	145.13	96.9	97.4	100.1	105.1	100.2	100.4
Q569Z6	Thyroid hormone receptor-associated protein 3 OS=Mus musculus OX=10090 GN=Thrap3 PE=1 SV=1	23	24	40	23	951	108.1	10.17	105.87	97.6	102	100.8	103.4	96.9	99.2
Q9R0P5	Destrin OS=Mus musculus OX=10090 GN=Dstn PE=1 SV=3	72	18	58	17	165	18.5	7.97	148.33	102.1	102.3	101.1	97.8	97.2	99.5
P05132	cAMP-dependent protein kinase catalytic subunit alpha OS=Mus musculus OX=10090 GN=Prkaca PE=1 SV=3	50	19	49	10	351	40.5	8.79	141.43	99.7	99.3	99.5	103.4	100.1	98.1
P67778	Prohibitin OS=Mus musculus OX=10090 GN=Phb PE=1 SV=1	57	16	43	16	272	29.8	5.76	158.02	98.7	101.1	99	100.4	101.5	99.3
Q8R570	Synaptosomal-associated protein 47 OS=Mus musculus OX=10090 GN=Snap47 PE=1 SV=1	48	18	37	18	413	46.5	5.76	121.48	95.2	99	100.1	102.7	98.5	104.6
Q3UGY8	Brefeldin A-inhibited guanine nucleotide-exchange protein 3 OS=Mus musculus OX=10090 GN=Arfgef3 PE=1 SV=1	10	20	32	20	2170	239.9	5.88	96.01	96.7	100.9	98.5	98.6	101.3	104
Q9JII6	Aldo-keto reductase family 1 member A1 OS=Mus musculus OX=10090 GN=Akr1a1 PE=1 SV=3	59	21	64	21	325	36.6	7.39	199.24	100.9	98.8	97.5	99	106.3	97.5
P09055	Integrin beta-1 OS=Mus musculus OX=10090 GN=Itgb1 PE=1 SV=1	23	18	37	18	798	88.2	5.94	124.88	95.6	97.4	101.8	103.9	98.2	103.2
Q8BP47	Asparagine--tRNA ligase, cytoplasmic OS=Mus musculus OX=10090 GN=NARS1 PE=1 SV=2	28	17	43	17	559	64.2	5.86	153.26	100.7	95.3	101.3	97.4	103.5	101.8
P26231	Catenin alpha-1 OS=Mus musculus OX=10090 GN=Ctnna1 PE=1 SV=1	25	22	40	13	906	100	6.23	128.67	97.6	98.6	101.3	103.8	97.2	101.5
P70404	Isocitrate dehydrogenase [NAD] subunit gamma 1, mitochondrial OS=Mus musculus OX=10090 GN=Idh3g PE=1 SV=1	54	18	46	18	393	42.8	9.01	177.57	103.2	98.9	98.1	99.2	104.5	96
Q02819	Nucleobindin-1 OS=Mus musculus OX=10090 GN=Nucb1 PE=1 SV=2	41	18	39	18	459	53.4	5.07	128.85	96	100.6	101.2	100.8	96.7	104.7
A2AHC3	Calmodulin-regulated spectrin-associated protein 1 OS=Mus musculus OX=10090 GN=Camsap1 PE=1 SV=1	19	26	40	25	1581	175.8	6.95	109.89	96.4	99	102.7	101.1	97.1	103.7
Q00493	Carboxypeptidase E OS=Mus musculus OX=10090 GN=Cpe PE=1 SV=2	44	22	55	22	476	53.2	5.19	167.95	99.1	97.8	98.6	99.1	100.5	104.8
Q3UH60	Disco-interacting protein 2 homolog B OS=Mus musculus OX=10090 GN=Dip2b PE=1 SV=1	18	23	43	23	1574	171	8.09	148.96	97.9	100.5	99.2	102.2	100.7	99.5
P55937	Golgin subfamily A member 3 OS=Mus musculus OX=10090 GN=Golga3 PE=1 SV=3	19	25	41	25	1487	167.1	5.4	123.64	92.7	100.1	102	100	102.5	102.8
Q80TS3	Adhesion G protein-coupled receptor L3 OS=Mus musculus OX=10090 GN=Adgrl3 PE=1 SV=3	16	23	38	23	1537	171	6.71	112.38	99.4	97.7	102.5	98.7	101.2	100.5
Q8BLQ9	Cell adhesion molecule 2 OS=Mus musculus OX=10090 GN=Cadm2 PE=1 SV=2	34	17	65	17	435	47.5	5.41	206.57	98	105.1	96.6	99.5	102.2	98.7
Q8CC88	von Willebrand factor A domain-containing protein 8 OS=Mus musculus OX=10090 GN=Vwa8 PE=1 SV=2	12	20	28	20	1905	213.3	6.6	80.34	98.6	98.3	98.8	101.4	102	100.9
Q99L47	Hsc70-interacting protein OS=Mus musculus OX=10090 GN=St13 PE=1 SV=1	32	14	60	14	371	41.6	5.26	204.51	97.1	101.4	103.6	98.9	97.6	101.4
Q8C437	PEX5-related protein OS=Mus musculus OX=10090 GN=Pex5l PE=1 SV=2	31	18	34	18	567	63.1	5.33	115.04	99.9	98.2	98.9	99.9	102.2	100.9
P26645	Myristoylated alanine-rich C-kinase substrate OS=Mus musculus OX=10090 GN=Marcks PE=1 SV=2	55	10	55	10	309	29.6	4.34	231.04	98.6	98.6	100.2	106.7	96.3	99.6
P00920	Carbonic anhydrase 2 OS=Mus musculus OX=10090 GN=Ca2 PE=1 SV=4	63	11	30	11	260	29	7.01	124.23	108.6	95.3	97.1	90.4	111.2	97.5
Q3UHB1	5'-nucleotidase domain-containing protein 3 OS=Mus musculus OX=10090 GN=Nt5dc3 PE=1 SV=1	28	19	58	19	546	63.1	8.56	165.84	97.9	102.7	103	100.7	95.3	100.4
Q8BIZ1	Ankyrin repeat and sterile alpha motif domain-containing protein 1B OS=Mus musculus OX=10090 GN=Anks1b PE=1 SV=3	13	18	51	17	1259	139	6.29	158.96	101.8	102.1	98.4	96.8	101.5	99.5
P14685	26S proteasome non-ATPase regulatory subunit 3 OS=Mus musculus OX=10090 GN=Psmd3 PE=1 SV=3	39	20	52	20	530	60.7	8.44	150.95	98.4	101.3	102.7	101.5	95.6	100.5
P11627	Neural cell adhesion molecule L1 OS=Mus musculus OX=10090 GN=L1cam PE=1 SV=1	19	24	47	24	1260	140.9	5.97	119.34	95.5	99.2	103.3	105.4	94.1	102.5
Q8BG39	Synaptic vesicle glycoprotein 2B OS=Mus musculus OX=10090 GN=Sv2b PE=1 SV=1	21	15	92	13	683	77.4	5.57	289.64	101	96.1	98.5	97.1	109.7	97.7
Q9DC69	NADH dehydrogenase [ubiquinone] 1 alpha subcomplex subunit 9, mitochondrial OS=Mus musculus OX=10090 GN=Ndufa9 PE=1 SV=2	41	18	68	18	377	42.5	9.74	234.59	102.2	98.9	97.5	101.6	102.6	97.2
P43274	Histone H1.4 OS=Mus musculus OX=10090 GN=H1-4 PE=1 SV=2	53	19	60	6	219	22	11.11	176.43	103.7	94.4	100.2	98.8	104.5	98.3
O70443	Guanine nucleotide-binding protein G(z) subunit alpha OS=Mus musculus OX=10090 GN=Gnaz PE=1 SV=4	46	15	61	14	355	40.8	7.61	191.08	99.9	99	101.3	101.9	100.1	97.8
P13020	Gelsolin OS=Mus musculus OX=10090 GN=Gsn PE=1 SV=3	27	21	66	21	780	85.9	6.18	196.47	104.3	99.8	98.2	92.3	98.8	106.5
Q61035	Histidine--tRNA ligase, cytoplasmic OS=Mus musculus OX=10090 GN=Hars1 PE=1 SV=2	36	21	41	18	509	57.4	6	128.59	98.9	99.1	103.6	103.3	91.3	103.9
Q5U3K5	Rab-like protein 6 OS=Mus musculus OX=10090 GN=Rabl6 PE=1 SV=2	29	21	39	21	725	79.8	5.53	115.07	98.8	98.3	101.7	99.6	100.3	101.2
Q91V12	Cytosolic acyl coenzyme A thioester hydrolase OS=Mus musculus OX=10090 GN=Acot7 PE=1 SV=2	38	18	57	18	381	42.5	8.68	192.84	98.9	102.3	97.1	101.2	98.3	102.3
P80560	Receptor-type tyrosine-protein phosphatase N2 OS=Mus musculus OX=10090 GN=Ptprn2 PE=1 SV=2	24	22	44	21	1001	111.4	5.95	118.11	99.5	97.1	99.8	105	99	99.5
Q61137	Astrotactin-1 OS=Mus musculus OX=10090 GN=Astn1 PE=1 SV=4	18	18	41	18	1302	144.8	5.21	139.18	96.3	100.1	101.2	99.6	101.6	101.3
Q921M3	Splicing factor 3B subunit 3 OS=Mus musculus OX=10090 GN=Sf3b3 PE=1 SV=1	20	22	36	22	1217	135.5	5.26	101.36	98.2	101.6	100.1	101.2	97.9	101
Q6PHZ2	Calcium/calmodulin-dependent protein kinase type II subunit delta OS=Mus musculus OX=10090 GN=Camk2d PE=1 SV=1	36	18	79	10	499	56.3	7.25	241.76	103.2	100.2	97.9	107.5	97.4	93.8
P62962	Profilin-1 OS=Mus musculus OX=10090 GN=Pfn1 PE=1 SV=2	76	10	67	10	140	14.9	8.28	208.25	97.8	103.6	99.8	98.4	98.1	102.3
P70168	Importin subunit beta-1 OS=Mus musculus OX=10090 GN=Kpnb1 PE=1 SV=2	23	19	46	19	876	97.1	4.78	118.99	101.8	100.4	99.6	98.2	98.3	101.7
Q61771	Kinesin-like protein KIF3B OS=Mus musculus OX=10090 GN=Kif3b PE=1 SV=1	31	24	45	18	747	85.2	7.69	133.03	101.2	100.5	100.8	99.7	99	98.9
Q99KY4	Cyclin-G-associated kinase OS=Mus musculus OX=10090 GN=Gak PE=1 SV=2	15	21	53	18	1305	143.6	5.73	158.36	98	98.1	101.8	100.5	101.1	100.4
Q9CZ44	NSFL1 cofactor p47 OS=Mus musculus OX=10090 GN=Nsfl1c PE=1 SV=1	58	16	42	16	370	40.7	5.15	151.19	100.7	98.5	99.8	100	99.2	101.8
O35250	Exocyst complex component 7 OS=Mus musculus OX=10090 GN=Exoc7 PE=1 SV=2	34	23	41	23	697	79.9	6.98	127.75	98	102.1	99.7	97.4	100.2	102.5
Q9R1V6	Disintegrin and metalloproteinase domain-containing protein 22 OS=Mus musculus OX=10090 GN=Adam22 PE=1 SV=2	26	21	45	21	904	99.7	7.83	131.85	104.7	97.3	98.7	99.7	102.4	97.2
P60335	Poly(rC)-binding protein 1 OS=Mus musculus OX=10090 GN=Pcbp1 PE=1 SV=1	53	13	48	8	356	37.5	7.09	161.26	100.5	102	99.5	99.6	97.5	100.9
O08810	116 kDa U5 small nuclear ribonucleoprotein component OS=Mus musculus OX=10090 GN=Eftud2 PE=1 SV=1	26	22	45	21	971	109.3	5	150.36	98.8	100.3	101.8	100	97.4	101.7
Q91ZJ5	UTP--glucose-1-phosphate uridylyltransferase OS=Mus musculus OX=10090 GN=Ugp2 PE=1 SV=3	43	20	48	20	508	56.9	7.61	155.75	103.3	102	96.1	96.8	101.1	100.7
Q9D0L8	mRNA cap guanine-N7 methyltransferase OS=Mus musculus OX=10090 GN=Rnmt PE=1 SV=1	41	18	45	18	465	53.3	6.48	135.71	99	98.3	100.7	103.2	100.6	98.1
P47962	60S ribosomal protein L5 OS=Mus musculus OX=10090 GN=Rpl5 PE=1 SV=3	38	16	40	16	297	34.4	9.77	124.4	94.7	104	101.6	102.7	94.1	102.9
O08709	Peroxiredoxin-6 OS=Mus musculus OX=10090 GN=Prdx6 PE=1 SV=3	60	14	41	14	224	24.9	6.01	134.58	103.9	98.1	97	96.4	109	95.6
Q9WVQ1	Membrane-associated guanylate kinase, WW and PDZ domain-containing protein 2 OS=Mus musculus OX=10090 GN=Magi2 PE=1 SV=2	20	22	29	22	1275	140.8	6.19	94.09	97.3	100.2	98.9	98.6	102.5	102.5
P63085	Mitogen-activated protein kinase 1 OS=Mus musculus OX=10090 GN=Mapk1 PE=1 SV=3	47	19	66	14	358	41.2	6.98	190.74	103.7	98.7	99.7	95.4	104.2	98.3
Q8C854	Myelin expression factor 2 OS=Mus musculus OX=10090 GN=Myef2 PE=1 SV=1	35	22	49	22	591	63.3	8.87	135.48	96.3	101.9	100	102.8	97.9	101.1
O35737	Heterogeneous nuclear ribonucleoprotein H OS=Mus musculus OX=10090 GN=Hnrnph1 PE=1 SV=3	38	15	55	4	449	49.2	6.3	187.09	95.9	101.8	98.7	103.8	97.1	102.8
Q6PDQ2	Chromodomain-helicase-DNA-binding protein 4 OS=Mus musculus OX=10090 GN=Chd4 PE=1 SV=1	14	25	43	14	1915	217.6	5.81	102.18	95.5	103.3	98.1	103.6	97	102.5
A2AJA9	Apical junction component 1 homolog OS=Mus musculus OX=10090 GN=Ajm1 PE=1 SV=1	31	28	42	28	974	107.1	9.11	113.74	98.2	99.1	99.6	97.8	103.9	101.3
Q6PB44	Tyrosine-protein phosphatase non-receptor type 23 OS=Mus musculus OX=10090 GN=Ptpn23 PE=1 SV=2	14	20	27	20	1692	185.1	6.8	83.43	96.5	99.9	99.3	100.5	103.1	100.7
Q9EPW0	Inositol polyphosphate-4-phosphatase type I A OS=Mus musculus OX=10090 GN=Inpp4a PE=1 SV=1	24	22	43	22	939	105.5	7.05	142.72	98.1	100.6	100.8	100.2	101.2	99.2
Q91VR2	ATP synthase subunit gamma, mitochondrial OS=Mus musculus OX=10090 GN=Atp5f1c PE=1 SV=1	43	15	72	15	298	32.9	9.01	182.34	101.4	102.2	98.4	99.9	99.7	98.5
Q8R071	Inositol-trisphosphate 3-kinase A OS=Mus musculus OX=10090 GN=Itpka PE=1 SV=1	43	18	37	18	459	50.9	7.72	124.78	99.4	98.9	93.8	92.7	119.3	95.8
Q8VHW2	Voltage-dependent calcium channel gamma-8 subunit OS=Mus musculus OX=10090 GN=Cacng8 PE=1 SV=1	44	10	48	10	423	43.4	9.2	238.18	95.9	105.3	99.5	97.2	101.8	100.3
Q9QYI3	DnaJ homolog subfamily C member 7 OS=Mus musculus OX=10090 GN=Dnajc7 PE=1 SV=2	41	21	44	20	494	56.4	6.49	125.87	95.2	103.3	102.8	99.5	98.3	100.9
P62482	Voltage-gated potassium channel subunit beta-2 OS=Mus musculus OX=10090 GN=Kcnab2 PE=1 SV=1	41	17	46	14	367	41	9	134.45	99	100.9	98.5	98	100.9	102.8
Q61191	Host cell factor 1 OS=Mus musculus OX=10090 GN=Hcfc1 PE=1 SV=2	13	22	34	22	2045	210.3	7.18	96.55	97	98.8	102.7	101	98.2	102.3
Q9JHK4	Geranylgeranyl transferase type-2 subunit alpha OS=Mus musculus OX=10090 GN=Rabggta PE=1 SV=1	38	20	41	20	567	64.9	5.8	127.19	100.1	98.1	101.5	100.2	100.2	99.9
P63001	Ras-related C3 botulinum toxin substrate 1 OS=Mus musculus OX=10090 GN=Rac1 PE=1 SV=1	47	12	70	6	192	21.4	8.5	251.68	100	103.7	99.4	99.5	99.7	97.6
P31938	Dual specificity mitogen-activated protein kinase kinase 1 OS=Mus musculus OX=10090 GN=Map2k1 PE=1 SV=2	46	19	59	12	393	43.4	6.7	179.35	103.8	101.2	98.6	96.3	102.3	97.9
O08808	Protein diaphanous homolog 1 OS=Mus musculus OX=10090 GN=Diaph1 PE=1 SV=1	18	23	39	23	1255	139.3	5.57	99.68	98.8	101.2	99.6	97.9	102.1	100.4
P63044	Vesicle-associated membrane protein 2 OS=Mus musculus OX=10090 GN=Vamp2 PE=1 SV=2	72	9	57	3	116	12.7	8.13	255.1	102.5	100.4	98.1	103	96.5	99.5
Q99KK7	Dipeptidyl peptidase 3 OS=Mus musculus OX=10090 GN=Dpp3 PE=1 SV=2	33	23	40	22	738	82.8	5.38	126.61	99.1	101.7	99.7	102.1	96.6	100.9
P12367	cAMP-dependent protein kinase type II-alpha regulatory subunit OS=Mus musculus OX=10090 GN=Prkar2a PE=1 SV=2	44	15	46	12	401	45.4	4.89	153.95	102.2	99.8	98.7	100.1	101.1	98.2
Q8VDP4	Cell cycle and apoptosis regulator protein 2 OS=Mus musculus OX=10090 GN=Ccar2 PE=1 SV=2	28	22	46	22	922	102.9	5.25	137.68	96.8	100.8	99.1	102.9	97.8	102.6
Q05512	Serine/threonine-protein kinase MARK2 OS=Mus musculus OX=10090 GN=Mark2 PE=1 SV=3	29	22	40	17	776	86.3	9.67	106.17	96.8	101.1	100.7	101.9	97.4	102.2
P12658	Calbindin OS=Mus musculus OX=10090 GN=Calb1 PE=1 SV=2	45	16	37	15	261	30	4.83	124.47	98.1	105.4	101.3	97.9	100.1	97.3
B2RXS4	Plexin-B2 OS=Mus musculus OX=10090 GN=Plxnb2 PE=1 SV=1	16	26	36	25	1842	206.1	5.87	105.4	96	99.2	101.8	102.8	99.6	100.5
P56959	RNA-binding protein FUS OS=Mus musculus OX=10090 GN=Fus PE=1 SV=1	19	12	57	12	518	52.6	9.36	179.61	102	101.2	100	100.8	97.1	98.9
P50544	Very long-chain specific acyl-CoA dehydrogenase, mitochondrial OS=Mus musculus OX=10090 GN=Acadvl PE=1 SV=3	36	21	37	21	656	70.8	8.75	111.88	101.1	99.6	103.6	100.5	95	100.2
Q9CZT8	Ras-related protein Rab-3B OS=Mus musculus OX=10090 GN=Rab3b PE=1 SV=1	56	13	60	7	219	24.7	5.11	188.96	101.7	99.7	99.5	103.1	101	95.2
Q9DB20	ATP synthase subunit O, mitochondrial OS=Mus musculus OX=10090 GN=Atp5po PE=1 SV=1	63	15	68	15	213	23.3	9.99	190.92	100.4	100.6	98.7	99.6	100.4	100.3
Q99LC5	Electron transfer flavoprotein subunit alpha, mitochondrial OS=Mus musculus OX=10090 GN=Etfa PE=1 SV=2	42	12	41	12	333	35	8.38	147.26	103.1	100.6	101.5	98.2	99.3	97.3
Q80UM3	N-alpha-acetyltransferase 15, NatA auxiliary subunit OS=Mus musculus OX=10090 GN=Naa15 PE=1 SV=1	26	28	44	28	865	100.9	7.62	107.15	95.9	100.2	100.7	101.8	97.8	103.6
Q9EPK7	Exportin-7 OS=Mus musculus OX=10090 GN=Xpo7 PE=1 SV=3	22	22	49	22	1087	123.7	6.38	157.48	98.1	99.8	98.6	100.6	102.9	100
P63037	DnaJ homolog subfamily A member 1 OS=Mus musculus OX=10090 GN=Dnaja1 PE=1 SV=1	44	17	45	17	397	44.8	7.08	155.65	95.8	100.9	105.4	97.3	100.7	99.9
P62908	40S ribosomal protein S3 OS=Mus musculus OX=10090 GN=Rps3 PE=1 SV=1	70	17	51	17	243	26.7	9.66	170.8	97.1	102.6	103.2	102.9	93.8	100.4
P47754	F-actin-capping protein subunit alpha-2 OS=Mus musculus OX=10090 GN=Capza2 PE=1 SV=3	76	14	48	11	286	32.9	5.85	209.03	99.3	102	97.2	99.6	101.8	100.2
Q8BGZ1	Hippocalcin-like protein 4 OS=Mus musculus OX=10090 GN=Hpcal4 PE=1 SV=3	72	14	53	9	191	22.2	4.89	149.89	98.1	99.3	102.6	99.8	101.2	99
P18052	Receptor-type tyrosine-protein phosphatase alpha OS=Mus musculus OX=10090 GN=Ptpra PE=1 SV=3	21	17	35	15	829	93.6	7.05	117.7	100	101	100.3	98.6	101.5	98.6
Q9Z1X4	Interleukin enhancer-binding factor 3 OS=Mus musculus OX=10090 GN=Ilf3 PE=1 SV=2	25	22	48	19	898	96	8.76	128.21	98.9	101.7	100.9	102.3	96.2	100
Q8BMG7	Rab3 GTPase-activating protein non-catalytic subunit OS=Mus musculus OX=10090 GN=Rab3gap2 PE=1 SV=2	18	23	39	23	1366	152.4	6.23	125.06	97.1	98.7	100.8	101.5	100.6	101.3
Q91VM9	Inorganic pyrophosphatase 2, mitochondrial OS=Mus musculus OX=10090 GN=Ppa2 PE=1 SV=1	45	15	33	15	330	38.1	6.98	120.17	100.4	95.6	100.1	103.4	100.8	99.7
Q8VD75	Huntingtin-interacting protein 1 OS=Mus musculus OX=10090 GN=Hip1 PE=1 SV=2	26	26	43	24	1029	115.1	5.43	115.77	96	99.9	99.6	101.9	99.6	103
O88685	26S proteasome regulatory subunit 6A OS=Mus musculus OX=10090 GN=Psmc3 PE=1 SV=2	53	20	50	20	442	49.5	5.19	152.45	100.9	102.8	100	99.7	95.2	101.6
Q9QYB5	Gamma-adducin OS=Mus musculus OX=10090 GN=Add3 PE=1 SV=2	25	19	54	19	706	78.7	5.95	153.54	100.6	100.1	98.6	100.4	99.3	101
Q99LI8	Hepatocyte growth factor-regulated tyrosine kinase substrate OS=Mus musculus OX=10090 GN=Hgs PE=1 SV=2	27	21	47	21	775	86	6.16	130.81	100.6	100	100.5	100	99.1	99.8
Q60634	Flotillin-2 OS=Mus musculus OX=10090 GN=Flot2 PE=1 SV=2	41	17	34	17	428	47	5.2	115.19	97.5	103.1	103	96.6	96.5	103.3
P70333	Heterogeneous nuclear ribonucleoprotein H2 OS=Mus musculus OX=10090 GN=Hnrnph2 PE=1 SV=1	43	16	61	6	449	49.2	6.3	204.86	96.8	102.2	101.5	103.5	95	101
P04370	Myelin basic protein OS=Mus musculus OX=10090 GN=Mbp PE=1 SV=2	50	13	140	13	250	27.2	9.58	432.55	117.4	84.4	88	87.9	114.6	107.7
A2A5R2	Brefeldin A-inhibited guanine nucleotide-exchange protein 2 OS=Mus musculus OX=10090 GN=Arfgef2 PE=1 SV=1	15	29	45	21	1792	202.1	6.55	122.12	98.4	100.8	101.1	102.1	98.4	99.3
Q6ZQ08	CCR4-NOT transcription complex subunit 1 OS=Mus musculus OX=10090 GN=Cnot1 PE=1 SV=2	10	21	26	21	2375	266.6	7.11	74.72	93.2	101.1	91.6	104.4	105.2	104.6
Q641P0	Actin-related protein 3B OS=Mus musculus OX=10090 GN=Actr3b PE=1 SV=1	43	15	55	11	418	47.5	6.02	181.54	102.1	103.7	100	94.8	100.4	99
Q9Z1P6	NADH dehydrogenase [ubiquinone] 1 alpha subcomplex subunit 7 OS=Mus musculus OX=10090 GN=Ndufa7 PE=1 SV=3	77	14	53	14	113	12.6	10.17	140.12	101.2	98.6	96.1	100.8	99.9	103.4
P28741	Kinesin-like protein KIF3A OS=Mus musculus OX=10090 GN=Kif3a PE=1 SV=2	29	19	39	19	701	80.1	6.54	116	96.7	100.6	99.6	98.3	101.6	103.3
Q8BVQ5	Protein phosphatase methylesterase 1 OS=Mus musculus OX=10090 GN=Ppme1 PE=1 SV=5	43	14	46	14	386	42.2	5.97	149.53	98.1	97.9	103	98.7	102.8	99.4
Q8BI84	Transport and Golgi organization protein 1 homolog OS=Mus musculus OX=10090 GN=Mia3 PE=1 SV=2	13	24	35	24	1930	213.5	4.75	87.21	92	99.2	102.7	103.4	96.3	106.4
Q04750	DNA topoisomerase 1 OS=Mus musculus OX=10090 GN=Top1 PE=1 SV=2	30	24	37	24	767	90.8	9.33	99.21	92.4	102.6	102.9	102.7	97.8	101.6
P15864	Histone H1.2 OS=Mus musculus OX=10090 GN=H1-2 PE=1 SV=2	47	17	52	4	212	21.3	11	156.34	98.6	96.9	101	101.8	106.6	95.1
P42669	Transcriptional activator protein Pur-alpha OS=Mus musculus OX=10090 GN=Pura PE=1 SV=1	58	17	75	15	321	34.9	6.44	277.5	102.8	99.9	97.9	101.5	100.1	97.8
Q0VGY8	Protein TANC1 OS=Mus musculus OX=10090 GN=Tanc1 PE=1 SV=2	16	24	41	23	1856	200.7	8.35	91.52	100.6	99.2	100.1	95.4	102.1	102.7
Q99MN9	Propionyl-CoA carboxylase beta chain, mitochondrial OS=Mus musculus OX=10090 GN=Pccb PE=1 SV=2	35	17	46	17	541	58.4	7.66	158.98	99.2	102.1	98.4	99.1	101.2	100.1
Q6P1F6	Serine/threonine-protein phosphatase 2A 55 kDa regulatory subunit B alpha isoform OS=Mus musculus OX=10090 GN=Ppp2r2a PE=1 SV=1	44	18	37	10	447	51.7	6.2	118.35	100.9	100.9	98.7	95.9	103.8	99.8
Q9CWS0	N(G),N(G)-dimethylarginine dimethylaminohydrolase 1 OS=Mus musculus OX=10090 GN=Ddah1 PE=1 SV=3	69	17	50	16	285	31.4	5.97	182.39	101.8	97.4	101	100.8	103.4	95.5
Q64105	Sepiapterin reductase OS=Mus musculus OX=10090 GN=Spr PE=1 SV=1	61	14	41	14	261	27.9	5.74	141.35	102.6	101.6	101	96.5	100.8	97.5
Q8R1B4	Eukaryotic translation initiation factor 3 subunit C OS=Mus musculus OX=10090 GN=Eif3c PE=1 SV=1	26	26	43	26	911	105.5	5.78	124.25	96.3	101.5	101.6	100.9	96.4	103.3
G3X9K3	Brefeldin A-inhibited guanine nucleotide-exchange protein 1 OS=Mus musculus OX=10090 GN=Arfgef1 PE=1 SV=1	15	27	40	19	1846	208.4	5.86	93.27	96.6	99.1	102.3	100.6	99.7	101.7
P35700	Peroxiredoxin-1 OS=Mus musculus OX=10090 GN=Prdx1 PE=1 SV=1	63	15	50	13	199	22.2	8.12	159.4	102.5	102.7	100.4	97.9	98.2	98.3
Q8CFI0	E3 ubiquitin-protein ligase NEDD4-like OS=Mus musculus OX=10090 GN=Nedd4l PE=1 SV=2	27	22	38	20	1004	115.3	6.15	110.01	99.8	98.4	97.9	97.3	102.8	103.6
Q64737	Trifunctional purine biosynthetic protein adenosine-3 OS=Mus musculus OX=10090 GN=Gart PE=1 SV=3	23	22	32	22	1010	107.4	6.68	107.28	99.3	100.1	98.9	99	102.4	100.2
Q6PDI5	Proteasome adapter and scaffold protein ECM29 OS=Mus musculus OX=10090 GN=Ecpas PE=1 SV=3	14	23	42	23	1840	203.6	7.06	93.27	95	99.4	99.2	100.8	101.7	104
Q68EF6	Brain-enriched guanylate kinase-associated protein OS=Mus musculus OX=10090 GN=Begain PE=1 SV=2	38	21	40	21	600	65.3	5.87	112.81	96	100.5	100.1	98.6	101.9	102.8
O35841	Apoptosis inhibitor 5 OS=Mus musculus OX=10090 GN=Api5 PE=1 SV=2	31	17	46	17	504	56.8	5.92	135.19	95.4	100.8	100.8	103.4	100.9	98.7
O55017	Voltage-dependent N-type calcium channel subunit alpha-1B OS=Mus musculus OX=10090 GN=Cacna1b PE=1 SV=1	9	21	40	19	2327	261.3	8.59	106.26	99.3	98.8	99.3	96.1	104.8	101.8
Q8BMK4	Cytoskeleton-associated protein 4 OS=Mus musculus OX=10090 GN=Ckap4 PE=1 SV=2	36	20	40	20	575	63.7	5.64	131.13	95.7	99.2	103.5	104.4	97.4	99.9
Q8BMF3	NADP-dependent malic enzyme, mitochondrial OS=Mus musculus OX=10090 GN=Me3 PE=1 SV=2	33	21	68	20	604	67.1	7.83	198.25	82.1	114.3	109.9	107.6	77.5	108.5
Q6ZQ82	Rho GTPase-activating protein 26 OS=Mus musculus OX=10090 GN=Arhgap26 PE=1 SV=3	26	20	37	20	814	92	6.68	117.89	94.8	96.9	102.3	104.8	101.5	99.7
Q9JIA1	Leucine-rich glioma-inactivated protein 1 OS=Mus musculus OX=10090 GN=Lgi1 PE=1 SV=1	30	18	43	18	557	63.6	8.02	133.98	103.3	98.2	97.8	100.3	102.7	97.7
Q99JI4	26S proteasome non-ATPase regulatory subunit 6 OS=Mus musculus OX=10090 GN=Psmd6 PE=1 SV=1	42	20	43	20	389	45.5	5.52	144.7	99.3	102.1	100.2	100.9	95.2	102.4
Q811P8	Rho GTPase-activating protein 32 OS=Mus musculus OX=10090 GN=Arhgap32 PE=1 SV=2	13	21	28	20	2089	229.6	6.86	86.34	98.4	100.2	99.5	102.3	101	98.7
Q6PAJ1	Breakpoint cluster region protein OS=Mus musculus OX=10090 GN=Bcr PE=1 SV=3	18	23	41	18	1270	143	6.92	112.52	97.4	98.2	99.8	99.5	103.2	101.9
P62334	26S proteasome regulatory subunit 10B OS=Mus musculus OX=10090 GN=Psmc6 PE=1 SV=1	56	19	42	19	389	44.1	7.49	122.48	97.3	99.8	100	99.8	100.1	103
Q810B6	Rabankyrin-5 OS=Mus musculus OX=10090 GN=Ankfy1 PE=1 SV=2	19	20	32	20	1169	128.6	5.91	98.19	94.7	96.5	112.4	100.3	96.5	99.6
Q8K010	5-oxoprolinase OS=Mus musculus OX=10090 GN=Oplah PE=1 SV=1	19	20	42	20	1288	137.5	6.28	141.69	101	95.6	104.4	97.6	102.6	98.7
P84086	Complexin-2 OS=Mus musculus OX=10090 GN=Cplx2 PE=1 SV=1	62	9	63	5	134	15.4	5.08	196.5	103.5	100.1	101.3	95.6	99.4	100.1
Q93092	Transaldolase OS=Mus musculus OX=10090 GN=Taldo1 PE=1 SV=2	39	15	61	15	337	37.4	7.03	172.25	102	100.6	98.3	97.5	100	101.6
Q6P1B1	Xaa-Pro aminopeptidase 1 OS=Mus musculus OX=10090 GN=Xpnpep1 PE=1 SV=1	36	21	43	21	623	69.5	5.54	118.92	97.4	102.3	101.5	99.5	94.1	105.2
Q6NSW3	A-kinase anchor protein SPHKAP OS=Mus musculus OX=10090 GN=Sphkap PE=1 SV=2	13	18	33	18	1687	185	5.06	99.87	92.9	107.9	100.1	103.3	92.6	103.4
Q9D0M3	Cytochrome c1, heme protein, mitochondrial OS=Mus musculus OX=10090 GN=Cyc1 PE=1 SV=1	31	8	86	8	325	35.3	9.16	317.27	102	96.6	100.2	96	105.5	99.7
Q9D6M3	Mitochondrial glutamate carrier 1 OS=Mus musculus OX=10090 GN=Slc25a22 PE=1 SV=1	45	11	66	8	323	34.6	9.09	265.13	100.3	101.7	100.4	98.4	99.8	99.4
Q921H8	3-ketoacyl-CoA thiolase A, peroxisomal OS=Mus musculus OX=10090 GN=Acaa1a PE=1 SV=1	44	13	32	13	424	43.9	8.44	151.54	98.1	100.3	100.4	100.1	97.5	103.6
Q9WV55	Vesicle-associated membrane protein-associated protein A OS=Mus musculus OX=10090 GN=Vapa PE=1 SV=2	50	16	42	15	249	27.8	8.4	107.07	99.9	103.3	98.2	104.1	96.7	97.9
Q8K394	Inactive phospholipase C-like protein 2 OS=Mus musculus OX=10090 GN=Plcl2 PE=1 SV=2	20	22	43	21	1128	125.7	6.92	114.65	100.7	97.6	99.5	100.8	101.7	99.8
Q80X80	Phospholipid transfer protein C2CD2L OS=Mus musculus OX=10090 GN=C2cd2l PE=1 SV=3	29	14	38	14	706	76.3	7.21	130.78	98.6	100.2	99.1	100	100.1	101.9
Q99KK2	N-acylneuraminate cytidylyltransferase OS=Mus musculus OX=10090 GN=Cmas PE=1 SV=2	38	19	28	19	432	48	8.1	97.3	100.5	97.8	103.7	102.1	96.9	99
Q8BP92	Reticulocalbin-2 OS=Mus musculus OX=10090 GN=Rcn2 PE=1 SV=1	53	15	38	15	320	37.2	4.42	117.93	96.3	96.8	105.9	101.5	100.8	98.6
Q8BG32	26S proteasome non-ATPase regulatory subunit 11 OS=Mus musculus OX=10090 GN=Psmd11 PE=1 SV=3	37	17	26	17	422	47.4	6.48	90.12	100.4	99.3	101.2	99.2	98.1	101.8
P28658	Ataxin-10 OS=Mus musculus OX=10090 GN=Atxn10 PE=1 SV=2	38	19	41	19	475	53.7	5.25	138.09	93.7	101.3	104	103.4	95.6	101.9
Q7TQI3	Ubiquitin thioesterase OTUB1 OS=Mus musculus OX=10090 GN=Otub1 PE=1 SV=2	49	10	65	10	271	31.3	4.94	281.17	100.7	99.6	98.8	100	98.8	102
P83510	Traf2 and NCK-interacting protein kinase OS=Mus musculus OX=10090 GN=Tnik PE=1 SV=2	17	24	48	15	1323	150.3	7.27	117	96.3	101.5	98.6	102	98.7	103
Q80TL0	Protein phosphatase 1E OS=Mus musculus OX=10090 GN=Ppm1e PE=1 SV=2	23	13	50	13	749	83.4	4.97	188.42	97.8	103.6	98.8	99.8	96.5	103.4
Q61097	Kinase suppressor of Ras 1 OS=Mus musculus OX=10090 GN=Ksr1 PE=1 SV=1	23	21	47	20	873	96.7	8.54	135.85	96.8	101.5	98.6	98.9	102.2	102
P62806	Histone H4 OS=Mus musculus OX=10090 GN=H4c1 PE=1 SV=2	60	10	90	10	103	11.4	11.36	270.78	96	101.5	100.1	104.5	100.7	97.2
Q5DTT2	PH and SEC7 domain-containing protein 1 OS=Mus musculus OX=10090 GN=Psd PE=1 SV=2	22	24	42	24	1024	109.6	7.05	105.66	98.8	101.8	99.1	97.8	99.5	102.9
P62196	26S proteasome regulatory subunit 8 OS=Mus musculus OX=10090 GN=Psmc5 PE=1 SV=1	44	18	50	16	406	45.6	7.55	161.34	100.6	101	101.6	99	96.8	100.9
Q9ERS2	NADH dehydrogenase [ubiquinone] 1 alpha subcomplex subunit 13 OS=Mus musculus OX=10090 GN=Ndufa13 PE=1 SV=3	49	9	43	9	144	16.8	9.48	167.37	100	97.8	98.2	100.1	104.4	99.5
Q8BH95	Enoyl-CoA hydratase, mitochondrial OS=Mus musculus OX=10090 GN=Echs1 PE=1 SV=1	44	13	42	13	290	31.5	8.48	143.55	104.7	101.8	98.8	100.5	95.4	98.9
Q61029	Lamina-associated polypeptide 2, isoforms beta/delta/epsilon/gamma OS=Mus musculus OX=10090 GN=Tmpo PE=1 SV=4	41	15	30	8	452	50.3	9.45	101.57	99.6	98.8	98.2	102.5	98.7	102.1
A2AG50	MAP7 domain-containing protein 2 OS=Mus musculus OX=10090 GN=Map7d2 PE=1 SV=1	25	21	50	20	781	86	8.81	114.73	101.8	96.8	96.8	97.6	103.4	103.6
P11103	Poly [ADP-ribose] polymerase 1 OS=Mus musculus OX=10090 GN=Parp1 PE=1 SV=3	24	22	34	22	1013	113	8.95	94.48	93.1	104.3	99.4	100.8	100.5	101.9
P28474	Alcohol dehydrogenase class-3 OS=Mus musculus OX=10090 GN=Adh5 PE=1 SV=3	43	15	52	15	374	39.5	7.25	193.89	100.5	98.4	103.2	97.2	100.8	99.9
Q8K4G5	Actin-binding LIM protein 1 OS=Mus musculus OX=10090 GN=Ablim1 PE=1 SV=1	24	20	27	19	861	96.7	8.63	73.88	104.5	100.7	96.9	97.8	100.9	99.2
Q921G7	Electron transfer flavoprotein-ubiquinone oxidoreductase, mitochondrial OS=Mus musculus OX=10090 GN=Etfdh PE=1 SV=1	32	18	46	18	616	68	7.58	146.07	102.2	100.1	100.1	98	102	97.5
Q9CZ30	Obg-like ATPase 1 OS=Mus musculus OX=10090 GN=Ola1 PE=1 SV=1	42	18	52	18	396	44.7	7.81	185.98	97.7	101.1	100.5	98.9	101.8	100.1
O08529	Calpain-2 catalytic subunit OS=Mus musculus OX=10090 GN=Capn2 PE=1 SV=4	28	18	37	18	700	79.8	4.96	126.13	99.5	97.8	101.5	99.3	102.1	99.9
Q8BLR2	Copine-4 OS=Mus musculus OX=10090 GN=Cpne4 PE=1 SV=1	33	18	46	17	557	62.4	6.33	140.79	97.8	104.2	99.5	97	100.6	101
P35279	Ras-related protein Rab-6A OS=Mus musculus OX=10090 GN=Rab6a PE=1 SV=4	67	13	54	5	208	23.6	5.54	166.65	100.7	100.2	99.6	97.9	99.9	101.7
Q6PHN9	Ras-related protein Rab-35 OS=Mus musculus OX=10090 GN=Rab35 PE=1 SV=1	77	17	49	13	201	23	8.29	146.81	100.6	101.5	97.7	101.4	99.4	99.4
Q6PDG5	SWI/SNF complex subunit SMARCC2 OS=Mus musculus OX=10090 GN=Smarcc2 PE=1 SV=2	19	22	46	17	1213	132.5	5.59	153.51	97.8	101.5	101.6	100.8	99.2	99.1
Q5SV85	Synergin gamma OS=Mus musculus OX=10090 GN=Synrg PE=1 SV=1	18	19	36	19	1306	139.5	5.03	110.09	100	98.9	98.5	100.6	100.8	101.2
Q69ZU6	Thrombospondin type-1 domain-containing protein 7A OS=Mus musculus OX=10090 GN=Thsd7a PE=1 SV=2	17	20	35	20	1645	183.4	7.2	92.72	98.4	100.5	101.4	97.5	101.1	101.2
P26638	Serine--tRNA ligase, cytoplasmic OS=Mus musculus OX=10090 GN=Sars1 PE=1 SV=3	40	19	45	19	512	58.4	6.3	135.65	100.2	100.2	98.7	99.5	101.1	100.3
Q3UHD1	Adhesion G protein-coupled receptor B1 OS=Mus musculus OX=10090 GN=Adgrb1 PE=1 SV=1	15	21	32	21	1582	173.2	7.56	96.53	95.2	98.9	100.6	101.7	101.2	102.4
Q99PT1	Rho GDP-dissociation inhibitor 1 OS=Mus musculus OX=10090 GN=Arhgdia PE=1 SV=3	50	12	73	12	204	23.4	5.2	237.25	97.9	100.3	100.2	100	99.9	101.6
Q921M7	CYFIP-related Rac1 interactor B OS=Mus musculus OX=10090 GN=Cyrib PE=1 SV=1	46	12	48	10	324	36.8	6.06	155.98	99.9	100.8	100.9	101.4	98.9	98
Q69ZW3	EH domain-binding protein 1 OS=Mus musculus OX=10090 GN=Ehbp1 PE=1 SV=3	15	19	28	19	1231	139	5.38	82.96	97.3	101.3	99.7	99.3	98.4	104
O88487	Cytoplasmic dynein 1 intermediate chain 2 OS=Mus musculus OX=10090 GN=Dync1i2 PE=1 SV=1	26	17	41	15	612	68.4	5.29	136.68	98.4	100.7	102.9	98.5	99.6	99.9
P97445	Voltage-dependent P/Q-type calcium channel subunit alpha-1A OS=Mus musculus OX=10090 GN=Cacna1a PE=1 SV=2	13	24	44	21	2368	267.5	8.85	103.73	100.4	98	99.1	98.7	101.8	101.9
Q8K4Z5	Splicing factor 3A subunit 1 OS=Mus musculus OX=10090 GN=Sf3a1 PE=1 SV=1	23	18	36	18	791	88.5	5.22	112.22	100.6	101.4	101.9	102.8	96.1	97.2
O35857	Mitochondrial import inner membrane translocase subunit TIM44 OS=Mus musculus OX=10090 GN=Timm44 PE=1 SV=2	38	21	44	21	452	51.1	8.13	126.91	92.9	102.5	105.4	99.4	103.9	95.9
Q7TQD2	Tubulin polymerization-promoting protein OS=Mus musculus OX=10090 GN=Tppp PE=1 SV=1	70	16	60	15	218	23.6	9.42	177.45	108.6	94.3	94.2	93.9	107.8	101.2
Q80X50	Ubiquitin-associated protein 2-like OS=Mus musculus OX=10090 GN=Ubap2l PE=1 SV=1	20	16	39	16	1107	116.7	7.11	123.78	97.7	101.4	102.5	102.1	93.8	102.5
P35235	Tyrosine-protein phosphatase non-receptor type 11 OS=Mus musculus OX=10090 GN=Ptpn11 PE=1 SV=3	42	23	50	23	593	68	7.3	128.19	102.5	98.4	99.4	97.3	104.4	98
P19536	Cytochrome c oxidase subunit 5B, mitochondrial OS=Mus musculus OX=10090 GN=Cox5b PE=1 SV=1	59	9	84	8	128	13.8	8.38	219.32	98.8	98.4	97.7	101.2	103.3	100.6
P97351	40S ribosomal protein S3a OS=Mus musculus OX=10090 GN=Rps3a PE=1 SV=3	53	19	63	19	264	29.9	9.73	162.67	96.2	105.3	101.8	103.1	92.5	101.2
P27659	60S ribosomal protein L3 OS=Mus musculus OX=10090 GN=Rpl3 PE=1 SV=3	45	24	77	24	403	46.1	10.21	188.37	96.7	103.9	102.5	101.9	93.6	101.3
P62897	Cytochrome c, somatic OS=Mus musculus OX=10090 GN=Cycs PE=1 SV=2	75	12	85	12	105	11.6	9.58	294.29	104.6	98.8	97.7	98.5	101.3	99.1
P18242	Cathepsin D OS=Mus musculus OX=10090 GN=Ctsd PE=1 SV=1	29	11	50	11	410	44.9	7.15	157.64	97.6	100.8	102.8	102.1	96.5	100.2
Q8BSL7	ADP-ribosylation factor 2 OS=Mus musculus OX=10090 GN=Arf2 PE=1 SV=2	62	11	54	1	181	20.7	6.58	190.47	71.7	75.9	87	94.9	90.4	180.1
Q6PGL7	WASH complex subunit 2 OS=Mus musculus OX=10090 GN=Washc2 PE=1 SV=1	19	21	26	21	1334	145.2	4.77	76.63	97.9	97.3	98.7	101.5	98.3	106.2
Q6ZQ18	Protein EFR3 homolog B OS=Mus musculus OX=10090 GN=Efr3b PE=1 SV=2	24	20	38	18	817	92.3	6.54	123.22	100.1	98.8	100.4	100.1	100.8	99.7
Q7TQH0	Ataxin-2-like protein OS=Mus musculus OX=10090 GN=Atxn2l PE=1 SV=1	20	22	38	20	1049	110.6	8.85	112.49	95.1	100.2	104	100.6	98.3	101.7
Q60668	Heterogeneous nuclear ribonucleoprotein D0 OS=Mus musculus OX=10090 GN=Hnrnpd PE=1 SV=2	40	17	47	15	355	38.3	7.81	128.79	97.5	103	102	104.2	94.2	99.1
Q9D1Q6	Endoplasmic reticulum resident protein 44 OS=Mus musculus OX=10090 GN=Erp44 PE=1 SV=1	48	18	33	17	406	46.8	5.27	110.73	97.9	101.2	103.8	101.6	95.5	100.1
O70194	Eukaryotic translation initiation factor 3 subunit D OS=Mus musculus OX=10090 GN=Eif3d PE=1 SV=2	34	15	27	15	548	63.9	6.05	97.97	97.5	100	103.1	99.8	96.4	103.2
P05532	Mast/stem cell growth factor receptor Kit OS=Mus musculus OX=10090 GN=Kit PE=1 SV=3	18	19	39	17	979	109.3	7.21	113.9	98.4	98.8	100.2	99.2	98.7	104.8
Q569Z5	Probable ATP-dependent RNA helicase DDX46 OS=Mus musculus OX=10090 GN=Ddx46 PE=1 SV=2	20	23	25	23	1032	117.4	9.26	78.63	96.5	100.7	100	103.4	97.3	102.1
Q9ESW4	Acylglycerol kinase, mitochondrial OS=Mus musculus OX=10090 GN=Agk PE=1 SV=1	33	14	34	14	421	46.9	8.4	125.38	99.3	102	99.9	103.6	96.8	98.3
Q60737	Casein kinase II subunit alpha OS=Mus musculus OX=10090 GN=Csnk2a1 PE=1 SV=2	48	15	39	15	391	45.1	7.74	151.96	98.2	99.8	99.8	100.3	99.7	102.3
Q9Z0R6	Intersectin-2 OS=Mus musculus OX=10090 GN=Itsn2 PE=1 SV=2	13	22	43	17	1659	188.8	8.13	92.01	98.2	97.8	103.3	97.7	101.9	101.1
Q9D1A2	Cytosolic non-specific dipeptidase OS=Mus musculus OX=10090 GN=Cndp2 PE=1 SV=1	37	15	53	15	475	52.7	5.66	194.34	101.1	101.6	102.4	98.6	94.9	101.4
Q3USB7	Inactive phospholipase C-like protein 1 OS=Mus musculus OX=10090 GN=Plcl1 PE=1 SV=3	20	21	36	20	1096	122.6	5.64	114.29	104.6	99.4	95.5	94.9	103.1	102.5
Q9CTY5	Calcium uptake protein 3, mitochondrial OS=Mus musculus OX=10090 GN=Micu3 PE=2 SV=2	32	16	28	16	523	59.8	7.15	92.23	102.3	98.8	99.2	99.3	101.1	99.3
Q8BKZ9	Pyruvate dehydrogenase protein X component, mitochondrial OS=Mus musculus OX=10090 GN=Pdhx PE=1 SV=1	38	15	39	15	501	54	7.75	133.01	102.2	98.8	100.8	99.7	101.6	96.8
Q91X97	Neurocalcin-delta OS=Mus musculus OX=10090 GN=Ncald PE=1 SV=4	65	13	71	7	193	22.2	5.35	154.37	97	99.2	97.1	106.4	100.4	99.8
Q80U40	RIMS-binding protein 2 OS=Mus musculus OX=10090 GN=Rimbp2 PE=1 SV=3	18	15	27	15	1072	118.3	5.35	83.65	99.9	100.1	98.9	98.6	100.9	101.7
Q6GYP7	Ral GTPase-activating protein subunit alpha-1 OS=Mus musculus OX=10090 GN=Ralgapa1 PE=1 SV=1	11	23	33	21	2035	229.2	6.1	83.02	97.9	99.5	100.5	101.5	99.6	101
O70228	Probable phospholipid-transporting ATPase IIA OS=Mus musculus OX=10090 GN=Atp9a PE=1 SV=3	22	23	40	21	1047	118.5	7.69	109.88	96.8	97.8	101.7	101.9	97.7	104
Q7SIG6	Arf-GAP with SH3 domain, ANK repeat and PH domain-containing protein 2 OS=Mus musculus OX=10090 GN=Asap2 PE=1 SV=3	25	20	24	19	958	106.7	6.65	73.61	96.4	101	101.2	100.1	95.6	105.7
Q8K021	Secretory carrier-associated membrane protein 1 OS=Mus musculus OX=10090 GN=Scamp1 PE=1 SV=1	41	13	47	13	338	38	7.71	180.29	100.4	102.6	100.4	98.4	97.6	100.6
Q91VN4	MICOS complex subunit Mic25 OS=Mus musculus OX=10090 GN=Chchd6 PE=1 SV=2	55	16	42	16	273	29.8	8.41	139.71	101.5	99	98.2	99.2	101.9	100.2
Q9ER72	Cysteine--tRNA ligase, cytoplasmic OS=Mus musculus OX=10090 GN=Cars1 PE=1 SV=2	26	21	37	21	831	94.8	6.76	107.24	100	102.5	105.3	101.7	90.8	99.7
P97434	Myosin phosphatase Rho-interacting protein OS=Mus musculus OX=10090 GN=Mprip PE=1 SV=2	24	23	25	23	1024	116.3	6.21	66.75	96.1	99.9	100.5	101.4	98.7	103.4
P54763	Ephrin type-B receptor 2 OS=Mus musculus OX=10090 GN=Ephb2 PE=1 SV=3	20	18	37	15	986	109.8	5.71	96.93	94.6	101.6	101.1	101.6	98.7	102.5
Q61292	Laminin subunit beta-2 OS=Mus musculus OX=10090 GN=Lamb2 PE=1 SV=2	16	22	46	21	1799	196.5	6.67	114.8	95	96.8	99.1	113.1	98.6	97.5
Q8C7R4	Ubiquitin-like modifier-activating enzyme 6 OS=Mus musculus OX=10090 GN=Uba6 PE=1 SV=1	22	19	30	19	1053	117.9	6.11	103.32	96.7	101.3	101.4	99.8	99.6	101.2
P27601	Guanine nucleotide-binding protein subunit alpha-13 OS=Mus musculus OX=10090 GN=Gna13 PE=1 SV=1	45	18	51	15	377	44	8.21	142	102.9	97.4	101.5	99.3	101.1	97.9
Q5SSM3	Rho GTPase-activating protein 44 OS=Mus musculus OX=10090 GN=Arhgap44 PE=1 SV=1	22	17	35	16	814	88.9	6.6	109.62	100.3	102.3	98.6	100.6	100.6	97.5
Q8C0C7	Phenylalanine--tRNA ligase alpha subunit OS=Mus musculus OX=10090 GN=Farsa PE=1 SV=1	30	15	37	15	508	57.6	8.28	122.07	97.2	102.9	103	101.7	94.8	100.4
Q8C3F2	Constitutive coactivator of PPAR-gamma-like protein 2 OS=Mus musculus OX=10090 GN=Fam120c PE=1 SV=3	22	19	31	17	1091	119.6	8.46	91.02	96.5	97.9	104.3	99.7	98.1	103.5
P51863	V-type proton ATPase subunit d 1 OS=Mus musculus OX=10090 GN=Atp6v0d1 PE=1 SV=2	44	15	65	15	351	40.3	5	208.7	102.5	100	99.2	98.8	103.1	96.4
Q80XI4	Phosphatidylinositol 5-phosphate 4-kinase type-2 beta OS=Mus musculus OX=10090 GN=Pip4k2b PE=1 SV=1	39	19	50	12	416	47.3	7.33	152.02	101.9	99.6	98.6	97.8	101.4	100.8
Q8K411	Presequence protease, mitochondrial OS=Mus musculus OX=10090 GN=Pitrm1 PE=1 SV=1	21	21	44	21	1036	117.3	7.2	127.26	97.1	97.7	101.6	101.6	101.9	100.2
P21278	Guanine nucleotide-binding protein subunit alpha-11 OS=Mus musculus OX=10090 GN=Gna11 PE=1 SV=1	40	15	49	10	359	42	5.97	135.51	100.5	99.2	101.5	102.4	99.5	96.9
Q8VHH5	Arf-GAP with GTPase, ANK repeat and PH domain-containing protein 3 OS=Mus musculus OX=10090 GN=Agap3 PE=1 SV=1	20	17	42	14	910	97.9	7.75	132.28	98.9	101.4	99.5	98.9	101.1	100.2
Q8BK64	Activator of 90 kDa heat shock protein ATPase homolog 1 OS=Mus musculus OX=10090 GN=Ahsa1 PE=1 SV=2	45	16	42	16	338	38.1	5.53	113.1	97.6	99.2	102.1	99.9	99.7	101.3
Q3TES0	IQ motif and SEC7 domain-containing protein 3 OS=Mus musculus OX=10090 GN=Iqsec3 PE=1 SV=1	19	23	37	20	1195	129	6.19	103.94	94.6	96.9	98.7	102.1	102.7	105
Q5SUR0	Phosphoribosylformylglycinamidine synthase OS=Mus musculus OX=10090 GN=Pfas PE=1 SV=1	19	21	33	21	1337	144.5	5.67	106.12	97.4	100.7	100.8	99.1	101.3	100.7
Q61290	Voltage-dependent R-type calcium channel subunit alpha-1E OS=Mus musculus OX=10090 GN=Cacna1e PE=1 SV=1	11	21	35	20	2272	257.1	8.18	95.39	101.2	100.6	99.3	100.4	100.8	97.8
A2ALU4	Protein Shroom2 OS=Mus musculus OX=10090 GN=Shroom2 PE=1 SV=1	15	18	31	18	1481	164.6	6.7	99.61	97.8	101.9	101.2	101.1	97.7	100.2
O70310	Glycylpeptide N-tetradecanoyltransferase 1 OS=Mus musculus OX=10090 GN=Nmt1 PE=1 SV=1	26	15	37	12	496	56.9	8	109.5	99.7	103.8	101.1	98.6	96.9	100
P62702	40S ribosomal protein S4, X isoform OS=Mus musculus OX=10090 GN=Rps4x PE=1 SV=2	59	17	45	17	263	29.6	10.15	125.83	97.1	104.5	101.6	102.6	93.3	100.9
P84084	ADP-ribosylation factor 5 OS=Mus musculus OX=10090 GN=Arf5 PE=1 SV=2	68	11	56	4	180	20.5	6.79	192.83	96.3	102.8	104.1	101.5	95.4	99.8
Q9DBS5	Kinesin light chain 4 OS=Mus musculus OX=10090 GN=Klc4 PE=1 SV=1	28	15	26	8	619	68.6	6.09	82.16	95.4	96.2	107.3	102.7	99.8	98.6
Q61464	Zinc finger protein 638 OS=Mus musculus OX=10090 GN=Znf638 PE=1 SV=2	12	21	32	21	1960	218	6.89	79.94	97.7	101.2	100.8	101.3	96.4	102.6
Q9JKC6	Cell cycle exit and neuronal differentiation protein 1 OS=Mus musculus OX=10090 GN=Cend1 PE=1 SV=1	59	13	53	13	149	15	8.97	161.44	100.8	99.5	98.4	102.3	99.7	99.3
Q61411	GTPase HRas OS=Mus musculus OX=10090 GN=Hras PE=1 SV=2	57	10	34	4	189	21.3	5.31	138.26	101.3	99.1	100.5	99.1	100.2	99.8
Q8CJG0	Protein argonaute-2 OS=Mus musculus OX=10090 GN=Ago2 PE=1 SV=3	20	17	28	13	860	97.2	9.19	74.46	99.1	95.8	101.5	102.1	102.2	99.4
P62137	Serine/threonine-protein phosphatase PP1-alpha catalytic subunit OS=Mus musculus OX=10090 GN=Ppp1ca PE=1 SV=1	40	12	36	3	330	37.5	6.33	146.29	103.2	102.5	96.2	99.4	102.3	96.5
Q7TT37	Elongator complex protein 1 OS=Mus musculus OX=10090 GN=Elp1 PE=1 SV=2	15	17	29	17	1333	149.5	6	105.73	96.3	99.9	101.6	103.4	97.8	100.9
Q9JIG7	Coiled-coil domain-containing protein 22 OS=Mus musculus OX=10090 GN=Ccdc22 PE=1 SV=1	28	17	37	17	627	70.8	6.01	103.03	101.9	99.7	100.5	98.1	98.7	101.1
P63040	Complexin-1 OS=Mus musculus OX=10090 GN=Cplx1 PE=1 SV=1	71	8	81	4	134	15.1	4.97	256.95	103.8	98	103.4	100.5	96.5	97.8
A2ALS5	Rap1 GTPase-activating protein 1 OS=Mus musculus OX=10090 GN=Rap1gap PE=1 SV=2	28	20	34	19	663	73.4	5.87	101.15	100.7	98.5	99.3	100.9	100.5	100
Q9R0Y5	Adenylate kinase isoenzyme 1 OS=Mus musculus OX=10090 GN=Ak1 PE=1 SV=1	60	18	48	17	194	21.5	5.81	158.77	101.5	96.6	95.3	112.9	97.9	95.9
P48318	Glutamate decarboxylase 1 OS=Mus musculus OX=10090 GN=Gad1 PE=1 SV=2	32	18	45	17	593	66.6	7.17	152.31	109.8	97.2	98.9	100.5	98.4	95.1
Q91VI7	Ribonuclease inhibitor OS=Mus musculus OX=10090 GN=Rnh1 PE=1 SV=1	38	14	38	14	456	49.8	4.78	129.69	102.1	101.2	100.6	96.8	102.1	97.1
Q62418	Drebrin-like protein OS=Mus musculus OX=10090 GN=Dbnl PE=1 SV=2	48	19	46	19	436	48.7	4.92	110.47	103.2	100.6	98.4	99.1	100.3	98.4
Q9Z204	Heterogeneous nuclear ribonucleoproteins C1/C2 OS=Mus musculus OX=10090 GN=Hnrnpc PE=1 SV=1	38	17	57	17	313	34.4	5.05	151.55	96.5	101.8	103.7	101.7	96.6	99.6
P14206	40S ribosomal protein SA OS=Mus musculus OX=10090 GN=Rpsa PE=1 SV=4	51	13	33	13	295	32.8	4.87	154.15	97.6	102.3	104.5	101.4	93.1	101.2
O08688	Calpain-5 OS=Mus musculus OX=10090 GN=Capn5 PE=1 SV=1	33	21	36	21	640	72.9	7.36	95.37	102.7	98.6	99.7	96.5	99.3	103.2
Q99KQ4	Nicotinamide phosphoribosyltransferase OS=Mus musculus OX=10090 GN=Nampt PE=1 SV=1	39	18	36	18	491	55.4	7.15	115.62	97.1	101.4	101.2	100.6	97.8	102
O70250	Phosphoglycerate mutase 2 OS=Mus musculus OX=10090 GN=Pgam2 PE=1 SV=3	39	12	76	8	253	28.8	8.5	234.84	112.2	97.6	105.7	95.1	97.1	92.3
P49025	Citron Rho-interacting kinase OS=Mus musculus OX=10090 GN=Cit PE=1 SV=3	10	21	30	21	2055	235.2	6.54	85.22	98.2	93.6	99.9	106.7	104.1	97.4
Q6PNC0	DmX-like protein 1 OS=Mus musculus OX=10090 GN=Dmxl1 PE=1 SV=1	9	25	48	22	3013	335.8	6.42	110.06	96.3	99.6	101	98.4	103.7	101
Q3TPX4	Exocyst complex component 5 OS=Mus musculus OX=10090 GN=Exoc5 PE=1 SV=2	30	22	34	22	708	81.7	6.71	118.65	99.8	101.3	98.3	98.9	101	100.7
O35286	Pre-mRNA-splicing factor ATP-dependent RNA helicase DHX15 OS=Mus musculus OX=10090 GN=Dhx15 PE=1 SV=2	26	21	36	21	795	90.9	7.46	121.03	96.8	102.8	102.7	101.1	97.4	99.2
Q6GQT9	Nodal modulator 1 OS=Mus musculus OX=10090 GN=Nomo1 PE=1 SV=1	16	18	29	18	1214	133.3	6.09	81.41	96.7	101.3	100.8	101	98.5	101.6
P05480	Neuronal proto-oncogene tyrosine-protein kinase Src OS=Mus musculus OX=10090 GN=Src PE=1 SV=5	32	16	30	11	535	59.9	7.42	104.74	95.4	101	102.1	100.2	100.6	100.6
Q8VHY0	Chondroitin sulfate proteoglycan 4 OS=Mus musculus OX=10090 GN=Cspg4 PE=1 SV=3	10	19	24	19	2327	252.2	5.44	80.02	94.5	100.4	105.7	100.3	96.9	102.2
P02089	Hemoglobin subunit beta-2 OS=Mus musculus OX=10090 GN=Hbb-b2 PE=1 SV=2	78	12	50	5	147	15.9	8.05	184.37	65.6	65.9	178	154	65.9	70.6
Q8R5M8	Cell adhesion molecule 1 OS=Mus musculus OX=10090 GN=Cadm1 PE=1 SV=2	32	13	41	13	456	49.8	5.03	172.2	98	97.5	99.4	101.3	102.4	101.5
Q8CHG3	GRIP and coiled-coil domain-containing protein 2 OS=Mus musculus OX=10090 GN=Gcc2 PE=1 SV=2	13	21	26	21	1679	194.3	5.12	68.81	91.2	95.6	100.1	102	105	106.1
Q60865	Caprin-1 OS=Mus musculus OX=10090 GN=Caprin1 PE=1 SV=2	26	15	31	15	707	78.1	5.25	115.3	95.9	101.8	102.8	100.2	96.9	102.4
Q8R326	Paraspeckle component 1 OS=Mus musculus OX=10090 GN=Pspc1 PE=1 SV=1	34	18	42	16	523	58.7	6.67	132.99	97.4	101.3	101.7	103.9	93	102.6
Q62433	Protein NDRG1 OS=Mus musculus OX=10090 GN=Ndrg1 PE=1 SV=1	43	10	32	10	394	43	6.1	109.57	105.7	87.5	98.8	95.9	108.8	103.3
Q9CRB9	MICOS complex subunit Mic19 OS=Mus musculus OX=10090 GN=Chchd3 PE=1 SV=1	53	17	31	16	227	26.3	8.37	109.79	102.4	99.7	98	99.9	100.5	99.5
D3YWQ0	Diacylglycerol kinase iota OS=Mus musculus OX=10090 GN=Dgki PE=1 SV=1	19	17	31	14	1071	118.1	7.91	98.37	101.5	97.4	96.8	100.3	108.3	95.7
Q9CX34	Protein SGT1 homolog OS=Mus musculus OX=10090 GN=Sugt1 PE=1 SV=3	45	15	42	15	336	38.1	5.45	150.06	97.9	99.6	100.8	99.2	102.4	100.2
O88485	Cytoplasmic dynein 1 intermediate chain 1 OS=Mus musculus OX=10090 GN=Dync1i1 PE=1 SV=2	37	18	34	16	628	70.7	5.12	102.24	99.9	100.2	99.3	99.2	96.2	105.1
Q8CI71	Syndetin OS=Mus musculus OX=10090 GN=Vps50 PE=1 SV=2	22	20	38	20	964	111.1	6.07	123.04	99.7	98	100.2	100	105.7	96.5
P97820	Mitogen-activated protein kinase kinase kinase kinase 4 OS=Mus musculus OX=10090 GN=Map4k4 PE=1 SV=1	17	21	41	14	1233	140.5	7.47	106.43	94.2	101.6	99.3	97.7	104.3	102.9
Q9JI18	Low-density lipoprotein receptor-related protein 1B OS=Mus musculus OX=10090 GN=Lrp1b PE=1 SV=1	7	28	37	26	4599	513.3	5.39	84.2	95.7	100.5	99.9	100.6	98.8	104.5
Q9JHI5	Isovaleryl-CoA dehydrogenase, mitochondrial OS=Mus musculus OX=10090 GN=Ivd PE=1 SV=1	30	14	34	14	424	46.3	8.29	112.62	101.7	100.9	100.3	99	98.2	100
Q9CY58	Plasminogen activator inhibitor 1 RNA-binding protein OS=Mus musculus OX=10090 GN=Serbp1 PE=1 SV=2	38	18	36	18	407	44.7	8.54	110.61	96.4	102.3	103.3	100.5	96.1	101.4
P08556	GTPase NRas OS=Mus musculus OX=10090 GN=Nras PE=1 SV=1	49	9	32	2	189	21.2	5.17	133.59	101	101.2	102	101.7	93.5	100.6
P63087	Serine/threonine-protein phosphatase PP1-gamma catalytic subunit OS=Mus musculus OX=10090 GN=Ppp1cc PE=1 SV=1	40	13	39	3	323	37	6.54	152.87	99.9	102	101	102.1	98.5	96.5
Q9D4H1	Exocyst complex component 2 OS=Mus musculus OX=10090 GN=Exoc2 PE=1 SV=1	20	22	34	22	924	103.9	7.18	91.89	98.3	101.1	97.4	101.6	100.2	101.4
Q9D7G0	Ribose-phosphate pyrophosphokinase 1 OS=Mus musculus OX=10090 GN=Prps1 PE=1 SV=4	39	12	28	7	318	34.8	6.98	118.02	100.9	98.9	99.7	98.1	100.4	102
Q920P5	Adenylate kinase isoenzyme 5 OS=Mus musculus OX=10090 GN=Ak5 PE=1 SV=2	30	18	39	17	562	63.3	5.29	108.93	99.5	101.5	100.4	99.1	94.8	104.8
Q810A7	ATP-dependent RNA helicase DDX42 OS=Mus musculus OX=10090 GN=Ddx42 PE=1 SV=3	20	16	26	16	929	101.9	6.98	85.07	94.7	102	102.8	101.6	99.8	99.1
Q6PDL0	Cytoplasmic dynein 1 light intermediate chain 2 OS=Mus musculus OX=10090 GN=Dync1li2 PE=1 SV=2	35	16	28	16	492	54.2	6.28	101.95	99.8	98.5	101.6	100.7	97.7	101.8
Q6WQJ1	Diacylglycerol lipase-alpha OS=Mus musculus OX=10090 GN=Dagla PE=1 SV=2	20	18	35	18	1044	115.3	6.42	113.06	97.4	104	100.1	97.4	99.1	101.9
Q8CIQ7	Dedicator of cytokinesis protein 3 OS=Mus musculus OX=10090 GN=Dock3 PE=1 SV=1	12	23	31	21	2027	232.8	6.99	94.72	97	98.8	98.8	102.9	101.9	100.6
Q9R0N7	Synaptotagmin-7 OS=Mus musculus OX=10090 GN=Syt7 PE=1 SV=1	34	16	33	16	403	45.4	9.28	98.27	100.6	102.6	98.4	100.4	99.2	98.8
B2RSH2	Guanine nucleotide-binding protein G(i) subunit alpha-1 OS=Mus musculus OX=10090 GN=Gnai1 PE=1 SV=1	42	15	60	6	354	40.3	5.97	190.74	100.5	96.6	100.6	97.7	107.3	97.2
Q80T41	Gamma-aminobutyric acid type B receptor subunit 2 OS=Mus musculus OX=10090 GN=Gabbr2 PE=1 SV=2	18	17	43	17	940	105.6	8.72	120.72	99.8	101	98.9	103.9	98	98.5
P43276	Histone H1.5 OS=Mus musculus OX=10090 GN=H1-5 PE=1 SV=2	48	16	42	11	223	22.6	10.92	121.73	95.9	97.7	102.9	99.5	102.3	101.7
P47911	60S ribosomal protein L6 OS=Mus musculus OX=10090 GN=Rpl6 PE=1 SV=3	43	20	46	20	296	33.5	10.7	128.37	95.6	104.1	100.7	103.3	93.2	103.1
P61294	Ras-related protein Rab-6B OS=Mus musculus OX=10090 GN=Rab6b PE=1 SV=1	59	14	45	6	208	23.4	5.53	141.04	99.3	101.9	99.6	101	97.4	100.9
Q9JJ28	Protein flightless-1 homolog OS=Mus musculus OX=10090 GN=Flii PE=1 SV=1	14	17	25	17	1271	144.7	6.06	75.56	99	99.5	105	98.2	96.8	101.6
Q5H8C4	Vacuolar protein sorting-associated protein 13A OS=Mus musculus OX=10090 GN=Vps13a PE=1 SV=1	7	21	40	20	3166	359.2	6.19	99.36	101	98.8	98.7	101.1	102.8	97.6
Q9R1T2	SUMO-activating enzyme subunit 1 OS=Mus musculus OX=10090 GN=Sae1 PE=1 SV=1	62	19	35	19	350	38.6	5.36	115.96	99.8	102.4	101.1	101.5	97.2	98
P45376	Aldo-keto reductase family 1 member B1 OS=Mus musculus OX=10090 GN=Akr1b1 PE=1 SV=3	53	17	41	16	316	35.7	7.18	114.32	102.6	101.9	98	97.9	101	98.6
Q9Z1R2	Large proline-rich protein BAG6 OS=Mus musculus OX=10090 GN=Bag6 PE=1 SV=1	19	18	46	17	1154	121	5.71	121.89	98.3	99.7	101	101.4	99.1	100.5
Q91WJ8	Far upstream element-binding protein 1 OS=Mus musculus OX=10090 GN=Fubp1 PE=1 SV=1	31	19	40	17	651	68.5	7.93	125.27	98.9	101.4	102.1	103.3	93.6	100.7
P19783	Cytochrome c oxidase subunit 4 isoform 1, mitochondrial OS=Mus musculus OX=10090 GN=Cox4i1 PE=1 SV=2	70	13	81	13	169	19.5	9.23	237.45	100.7	99.9	97.5	100.9	105	95.9
Q8BXR9	Oxysterol-binding protein-related protein 6 OS=Mus musculus OX=10090 GN=Osbpl6 PE=1 SV=1	20	15	23	15	959	108.9	7.27	88.12	96.9	100.6	103	97.2	102.1	100.3
Q8VCW8	Medium-chain acyl-CoA ligase ACSF2, mitochondrial OS=Mus musculus OX=10090 GN=Acsf2 PE=1 SV=1	23	15	29	15	615	67.9	8.18	94.31	99.2	96.9	97.8	103	102.3	100.8
Q9DC61	Mitochondrial-processing peptidase subunit alpha OS=Mus musculus OX=10090 GN=Pmpca PE=1 SV=1	34	18	32	18	524	58.2	6.83	103.99	98.1	99.7	101.9	100.6	97.1	102.6
Q9CQM9	Glutaredoxin-3 OS=Mus musculus OX=10090 GN=Glrx3 PE=1 SV=1	39	14	41	14	337	37.8	5.59	146.37	96.5	103.2	104.1	99.4	97.8	99
P48036	Annexin A5 OS=Mus musculus OX=10090 GN=Anxa5 PE=1 SV=1	54	18	56	17	319	35.7	4.96	156.56	110.8	89.5	93.5	89.7	110.9	105.6
Q99MR8	Methylcrotonoyl-CoA carboxylase subunit alpha, mitochondrial OS=Mus musculus OX=10090 GN=Mccc1 PE=1 SV=2	33	19	25	19	717	79.3	7.83	77.91	96.4	102.1	104.8	104.4	97.4	94.9
P62141	Serine/threonine-protein phosphatase PP1-beta catalytic subunit OS=Mus musculus OX=10090 GN=Ppp1cb PE=1 SV=3	36	12	46	3	327	37.2	6.19	177	101.9	100.3	99.5	97.6	101.8	98.9
Q8K0S0	Phytanoyl-CoA hydroxylase-interacting protein OS=Mus musculus OX=10090 GN=Phyhip PE=1 SV=1	39	14	64	11	330	37.5	7.01	179.02	102.2	105	97.3	97.8	101.9	95.8
P56695	Wolframin OS=Mus musculus OX=10090 GN=Wfs1 PE=1 SV=1	17	17	45	17	890	100.5	7.97	153.03	101.3	103.6	96.9	103.2	100.7	94.3
Q69ZK0	Phosphatidylinositol 3,4,5-trisphosphate-dependent Rac exchanger 1 protein OS=Mus musculus OX=10090 GN=Prex1 PE=1 SV=2	12	20	26	19	1650	184.8	6.29	76.34	94.2	104.2	99.7	103.7	95.1	103.1
Q80XK6	Autophagy-related protein 2 homolog B OS=Mus musculus OX=10090 GN=Atg2b PE=1 SV=3	10	18	29	18	2075	231.3	5.88	82.29	96.4	97.1	102.1	101	103.5	99.8
Q99PU8	ATP-dependent RNA helicase DHX30 OS=Mus musculus OX=10090 GN=Dhx30 PE=1 SV=1	17	20	31	20	1217	136.6	8.75	87.89	98.2	96.4	102.4	102.4	96	104.6
P14148	60S ribosomal protein L7 OS=Mus musculus OX=10090 GN=Rpl7 PE=1 SV=2	38	16	41	16	270	31.4	10.89	121.22	96.5	107	102.3	103.1	93.1	98.1
P70441	Na(+)/H(+) exchange regulatory cofactor NHE-RF1 OS=Mus musculus OX=10090 GN=Slc9a3r1 PE=1 SV=3	47	16	50	16	355	38.6	5.9	120.29	99.1	99.4	99.2	99.9	102.6	99.7
Q9R0X4	Acyl-coenzyme A thioesterase 9, mitochondrial OS=Mus musculus OX=10090 GN=Acot9 PE=1 SV=1	32	14	33	14	439	50.5	8.59	95.5	99.3	100.4	99.4	99.6	100	101.3
Q80TK0	AP2-interacting clathrin-endocytosis protein OS=Mus musculus OX=10090 GN=Kiaa1107 PE=1 SV=6	18	19	34	19	1239	134	6.61	86.27	98.2	98.4	101.3	100.3	100.8	101
Q8CCT4	Transcription elongation factor A protein-like 5 OS=Mus musculus OX=10090 GN=Tceal5 PE=1 SV=1	66	17	50	8	200	22	6.2	122.77	109.6	95.4	98.2	101.8	96.8	98.2
Q08331	Calretinin OS=Mus musculus OX=10090 GN=Calb2 PE=1 SV=3	55	17	36	16	271	31.4	5.02	102.42	98.8	96.3	101.1	103	98.5	102.3
Q9D8W5	26S proteasome non-ATPase regulatory subunit 12 OS=Mus musculus OX=10090 GN=Psmd12 PE=1 SV=4	35	18	49	18	456	52.9	7.06	146.55	96.8	99.7	101.5	101	99.9	101.2
A2AAE1	Transmembrane protein KIAA1109 OS=Mus musculus OX=10090 GN=Kiaa1109 PE=1 SV=4	6	29	36	29	5005	555	6.61	60.49	98.5	98.1	98.8	97.5	105.2	101.9
P42208	Septin-2 OS=Mus musculus OX=10090 GN=Septin2 PE=1 SV=2	47	14	37	14	361	41.5	6.55	128.39	100.2	99.7	100.1	99.7	99.9	100.4
Q80W21	Glutathione S-transferase Mu 7 OS=Mus musculus OX=10090 GN=Gstm7 PE=1 SV=1	72	16	32	9	218	25.7	6.8	96.18	102.8	96.5	92.5	97.3	112.3	98.5
Q9ESJ4	NCK-interacting protein with SH3 domain OS=Mus musculus OX=10090 GN=Nckipsd PE=1 SV=2	27	18	39	18	714	78.5	6.05	124.7	102.1	98	98.6	98.7	101.1	101.5
Q8JZP2	Synapsin-3 OS=Mus musculus OX=10090 GN=Syn3 PE=1 SV=2	31	16	53	14	579	63.3	9.38	121.86	96.9	99.5	99.4	101	103.1	100
P70699	Lysosomal alpha-glucosidase OS=Mus musculus OX=10090 GN=Gaa PE=1 SV=2	22	17	34	17	953	106.2	5.83	100.76	98.1	100.1	98	100.9	98.5	104.4
Q9JL26	Formin-like protein 1 OS=Mus musculus OX=10090 GN=Fmnl1 PE=1 SV=1	20	20	37	18	1094	122	5.82	106.62	96	99.2	99.4	98.9	103.6	102.8
Q9WVR4	Fragile X mental retardation syndrome-related protein 2 OS=Mus musculus OX=10090 GN=Fxr2 PE=1 SV=1	24	16	34	13	673	73.7	6.23	111.96	97.4	103.8	99.5	102.2	96.5	100.7
Q8CBW3	Abl interactor 1 OS=Mus musculus OX=10090 GN=Abi1 PE=1 SV=3	29	14	31	12	481	52.3	7.64	112.06	99.3	104.1	98.7	97.8	99.7	100.4
Q9EPL8	Importin-7 OS=Mus musculus OX=10090 GN=Ipo7 PE=1 SV=2	16	14	31	14	1038	119.4	4.82	114.7	97.8	99.2	101.7	102.2	99.2	99.9
P97371	Proteasome activator complex subunit 1 OS=Mus musculus OX=10090 GN=Psme1 PE=1 SV=2	49	13	24	13	249	28.7	5.97	86.49	99.2	98.7	102.6	97.4	99.4	102.7
Q80TL4	PHD finger protein 24 OS=Mus musculus OX=10090 GN=Phf24 PE=1 SV=2	37	17	42	17	400	45.2	5.77	146.57	102.8	97.3	100.9	99.5	101.7	97.8
Q61990	Poly(rC)-binding protein 2 OS=Mus musculus OX=10090 GN=Pcbp2 PE=1 SV=1	41	11	46	5	362	38.2	6.79	139.28	98.7	99.7	102.4	99.7	98.8	100.6
Q9Z1Q2	Phosphatidylserine lipase ABHD16A OS=Mus musculus OX=10090 GN=Abhd16a PE=1 SV=3	37	16	32	16	558	63	8.25	112.21	99.5	99.4	98.8	99.3	101.7	101.2
P62812	Gamma-aminobutyric acid receptor subunit alpha-1 OS=Mus musculus OX=10090 GN=Gabra1 PE=1 SV=1	36	19	46	11	455	51.7	9.31	132.88	100	99.5	99.6	103.8	100.9	96.2
P28661	Septin-4 OS=Mus musculus OX=10090 GN=Septin4 PE=1 SV=1	36	18	64	14	478	54.9	5.87	172.57	104.3	91.2	97.6	101	104.8	101.1
A2RSJ4	UHRF1-binding protein 1-like OS=Mus musculus OX=10090 GN=Uhrf1bp1l PE=1 SV=2	16	23	31	23	1457	161.8	6.61	94.06	97.6	100.1	100.8	98.6	100.9	102
Q9DBT5	AMP deaminase 2 OS=Mus musculus OX=10090 GN=Ampd2 PE=1 SV=1	26	22	37	21	798	92	6.23	105.92	101.5	101.2	98.5	97.8	102.2	98.8
P68181	cAMP-dependent protein kinase catalytic subunit beta OS=Mus musculus OX=10090 GN=Prkacb PE=1 SV=2	41	15	41	6	351	40.7	8.56	131.72	100.4	91.8	104.4	107.8	99.9	95.6
Q9CR68	Cytochrome b-c1 complex subunit Rieske, mitochondrial OS=Mus musculus OX=10090 GN=Uqcrfs1 PE=1 SV=1	60	15	52	15	274	29.3	8.7	198.01	101.6	99.2	99.5	100.2	100.9	98.5
P60202	Myelin proteolipid protein OS=Mus musculus OX=10090 GN=Plp1 PE=1 SV=2	34	11	126	11	277	30.1	8.35	390.98	123.5	84.7	86.3	84.9	119.6	100.9
Q9CR62	Mitochondrial 2-oxoglutarate/malate carrier protein OS=Mus musculus OX=10090 GN=Slc25a11 PE=1 SV=3	51	16	53	16	314	34.1	9.94	151.39	101.3	101.3	97	100.6	102.4	97.4
Q9WTP7	GTP:AMP phosphotransferase AK3, mitochondrial OS=Mus musculus OX=10090 GN=Ak3 PE=1 SV=3	56	13	31	13	227	25.4	8.84	100.37	103.2	96.2	99.2	102.3	102.6	96.6
Q9CPW0	Contactin-associated protein-like 2 OS=Mus musculus OX=10090 GN=Cntnap2 PE=1 SV=2	16	19	39	19	1332	148.1	6.77	120.95	102.9	99	100.4	98	100	99.8
O35375	Neuropilin-2 OS=Mus musculus OX=10090 GN=Nrp2 PE=1 SV=2	26	18	37	18	931	104.6	5.24	111.47	93.7	101.2	103.5	99.2	98.9	103.6
Q9WTM5	RuvB-like 2 OS=Mus musculus OX=10090 GN=Ruvbl2 PE=1 SV=3	27	14	27	14	463	51.1	5.64	86.29	98.1	99.5	102.5	100.3	98.6	101.1
P97393	Rho GTPase-activating protein 5 OS=Mus musculus OX=10090 GN=Arhgap5 PE=1 SV=2	13	18	28	17	1501	172	6.34	67.16	97.4	97.4	99	102.8	100.9	102.5
Q63844	Mitogen-activated protein kinase 3 OS=Mus musculus OX=10090 GN=Mapk3 PE=1 SV=5	43	17	38	11	380	43	6.61	109.56	100	97.6	100.2	99.2	100.5	102.4
Q8VDM6	Heterogeneous nuclear ribonucleoprotein U-like protein 1 OS=Mus musculus OX=10090 GN=Hnrnpul1 PE=1 SV=1	24	18	33	18	859	95.9	6.58	97.03	99.7	101.7	98.2	102.3	97.2	101
A6H5Z3	Exocyst complex component 6B OS=Mus musculus OX=10090 GN=Exoc6b PE=1 SV=1	22	18	35	17	810	94.1	6.39	89.29	100.6	101.4	96.9	100	100.3	100.9
P61202	COP9 signalosome complex subunit 2 OS=Mus musculus OX=10090 GN=Cops2 PE=1 SV=1	37	17	35	17	443	51.6	5.53	120.25	99.6	98.8	98.7	98.6	105.4	98.9
Q80Y17	Lethal(2) giant larvae protein homolog 1 OS=Mus musculus OX=10090 GN=Llgl1 PE=1 SV=1	21	17	24	16	1036	112.5	6.48	90.23	100.6	95.8	97	97.9	104.8	103.9
Q3TXX4	Vesicular glutamate transporter 1 OS=Mus musculus OX=10090 GN=Slc17a7 PE=1 SV=2	16	10	43	8	560	61.6	7.34	141.3	101.2	100	99.9	98.5	105.4	94.9
A2APX8	Sodium channel protein type 1 subunit alpha OS=Mus musculus OX=10090 GN=Scn1a PE=1 SV=1	7	16	31	8	2009	228.7	5.87	92.79	84.6	82.1	83.7	117.7	120.8	111.2
Q8BLF1	Neutral cholesterol ester hydrolase 1 OS=Mus musculus OX=10090 GN=Nceh1 PE=1 SV=1	32	13	22	13	408	45.7	7.05	80.11	99.9	100.5	99.3	100.9	100	99.5
P70414	Sodium/calcium exchanger 1 OS=Mus musculus OX=10090 GN=Slc8a1 PE=1 SV=1	16	15	45	15	970	108	5	124.67	101	101.5	99.5	97.7	100.1	100.2
Q69ZH9	Rho GTPase-activating protein 23 OS=Mus musculus OX=10090 GN=Arhgap23 PE=1 SV=2	13	18	36	18	1483	161.7	8.98	109.27	98.6	101.3	100.3	99.5	99	101.4
Q60575	Kinesin-like protein KIF1B OS=Mus musculus OX=10090 GN=Kif1b PE=1 SV=2	12	21	39	10	1816	204	5.62	93.86	94.9	102.5	94.5	101.9	99.5	106.8
Q80XR2	Calcium-transporting ATPase type 2C member 1 OS=Mus musculus OX=10090 GN=Atp2c1 PE=1 SV=2	22	17	23	16	918	100.2	6.83	70.92	96	102.6	101.8	101.9	94.3	103.3
Q6NS60	F-box only protein 41 OS=Mus musculus OX=10090 GN=Fbxo41 PE=1 SV=3	24	20	38	20	873	94.3	8.24	108.77	96.6	101.4	100.3	103.3	95	103.4
O08919	Numb-like protein OS=Mus musculus OX=10090 GN=Numbl PE=1 SV=3	24	16	38	13	604	64.1	8.82	124.67	100	99.7	101	97.9	99.3	102.1
Q922D4	Serine/threonine-protein phosphatase 6 regulatory subunit 3 OS=Mus musculus OX=10090 GN=Ppp6r3 PE=1 SV=1	21	15	22	15	844	94.6	4.58	67.46	100.3	100.3	102.7	99.6	98	99
Q91W86	Vacuolar protein sorting-associated protein 11 homolog OS=Mus musculus OX=10090 GN=Vps11 PE=1 SV=3	21	19	35	19	941	107.7	7.01	107.16	99.7	100.1	99	102.9	97.4	100.8
P61164	Alpha-centractin OS=Mus musculus OX=10090 GN=Actr1a PE=1 SV=1	39	14	63	6	376	42.6	6.64	192.21	103.3	99.6	99.6	99.9	98.8	98.7
B1AY13	Ubiquitin carboxyl-terminal hydrolase 24 OS=Mus musculus OX=10090 GN=Usp24 PE=1 SV=1	9	22	28	22	2617	293.8	6.19	87.25	97.6	97	101.5	100.8	100	103.2
Q9Z0N1	Eukaryotic translation initiation factor 2 subunit 3, X-linked OS=Mus musculus OX=10090 GN=Eif2s3x PE=1 SV=2	38	19	35	19	472	51	8.4	109.81	96.9	99.5	103.1	98.7	99.9	101.9
O35633	Vesicular inhibitory amino acid transporter OS=Mus musculus OX=10090 GN=Slc32a1 PE=1 SV=3	28	13	47	13	525	57.3	6.64	183.7	97.2	99.5	99.3	102.7	103.6	97.7
Q61037	Tuberin OS=Mus musculus OX=10090 GN=Tsc2 PE=1 SV=1	12	19	22	19	1814	201.9	6.98	67.35	95.4	97.3	100.6	100.7	100	105.9
Q8VEM8	Phosphate carrier protein, mitochondrial OS=Mus musculus OX=10090 GN=Slc25a3 PE=1 SV=1	29	13	73	13	357	39.6	9.26	180.62	98.9	100.4	99.4	100.6	105	95.8
P08228	Superoxide dismutase [Cu-Zn] OS=Mus musculus OX=10090 GN=Sod1 PE=1 SV=2	59	10	79	10	154	15.9	6.51	233.46	103.4	98.2	97.7	97.7	102	100.9
P48320	Glutamate decarboxylase 2 OS=Mus musculus OX=10090 GN=Gad2 PE=1 SV=1	25	12	30	11	585	65.2	6.9	97.46	108	98.1	99.7	97.6	97	99.5
Q9Z130	Heterogeneous nuclear ribonucleoprotein D-like OS=Mus musculus OX=10090 GN=Hnrnpdl PE=1 SV=1	41	16	45	14	301	33.5	7.31	132.22	100.4	102.2	101.8	102	92.7	101
Q9CQQ7	ATP synthase F(0) complex subunit B1, mitochondrial OS=Mus musculus OX=10090 GN=Atp5pb PE=1 SV=1	31	12	51	12	256	28.9	9.06	146.86	101.3	100.9	98.3	100.3	100.5	98.8
Q9QZM0	Ubiquilin-2 OS=Mus musculus OX=10090 GN=Ubqln2 PE=1 SV=2	20	9	32	7	638	67.3	5.22	121.76	97.9	100.2	108	97.8	98.1	98
Q6PGF7	Exocyst complex component 8 OS=Mus musculus OX=10090 GN=Exoc8 PE=1 SV=1	26	21	41	21	716	81	5.4	104.49	97.8	99.6	101.9	99.6	100.3	100.8
Q9D7B6	Isobutyryl-CoA dehydrogenase, mitochondrial OS=Mus musculus OX=10090 GN=Acad8 PE=1 SV=2	39	15	34	15	413	45	8.13	107.39	93.8	103.9	98.2	103.4	91.2	109.4
Q80Z24	Neuronal growth regulator 1 OS=Mus musculus OX=10090 GN=Negr1 PE=1 SV=1	39	11	35	11	348	37.9	6.52	128.63	100.6	96.5	101.8	98.7	101.7	100.6
Q8QZY1	Eukaryotic translation initiation factor 3 subunit L OS=Mus musculus OX=10090 GN=Eif3l PE=1 SV=1	34	18	32	18	564	66.6	6.44	96.69	97.1	101.4	101.4	102.9	94.5	102.6
Q8CHH9	Septin-8 OS=Mus musculus OX=10090 GN=Septin8 PE=1 SV=4	34	16	49	11	429	49.8	6	144.16	107.2	97.3	98.7	97.1	103.9	95.8
Q9CU62	Structural maintenance of chromosomes protein 1A OS=Mus musculus OX=10090 GN=Smc1a PE=1 SV=4	16	21	36	21	1233	143.1	7.64	81.72	100.5	98.6	98.6	103.3	100.1	98.9
P51174	Long-chain specific acyl-CoA dehydrogenase, mitochondrial OS=Mus musculus OX=10090 GN=Acadl PE=1 SV=2	25	10	34	10	430	47.9	8.31	129.7	102.2	96.7	104.1	99.9	100.9	96.2
P61027	Ras-related protein Rab-10 OS=Mus musculus OX=10090 GN=Rab10 PE=1 SV=1	65	16	61	12	200	22.5	8.38	170.19	99.8	101.9	100.3	100.7	97.7	99.6
Q61081	Hsp90 co-chaperone Cdc37 OS=Mus musculus OX=10090 GN=Cdc37 PE=1 SV=1	40	13	38	13	379	44.6	5.34	129.25	98.7	101	99.3	98.1	101.3	101.6
Q9QYS2	Metabotropic glutamate receptor 3 OS=Mus musculus OX=10090 GN=Grm3 PE=1 SV=1	22	22	38	19	879	99.1	7.75	99.03	98	98.7	100.9	104	101.2	97.1
Q7TNG5	Echinoderm microtubule-associated protein-like 2 OS=Mus musculus OX=10090 GN=Eml2 PE=1 SV=1	26	16	30	16	649	70.7	6.28	111.84	99.4	100.3	101.1	103.8	95.5	100
Q9CZY3	Ubiquitin-conjugating enzyme E2 variant 1 OS=Mus musculus OX=10090 GN=Ube2v1 PE=1 SV=1	71	11	57	5	147	16.3	7.96	168.46	98.7	100.3	100.7	98.9	102.8	98.5
Q64525	Histone H2B type 2-B OS=Mus musculus OX=10090 GN=Hist2h2bb PE=1 SV=3	63	11	72	5	126	13.9	10.32	203.27	96.8	99.7	101.3	102.8	101.4	97.9
Q924M7	Mannose-6-phosphate isomerase OS=Mus musculus OX=10090 GN=Mpi PE=1 SV=1	27	9	34	9	423	46.5	5.95	96.79	100.7	100.9	101.1	102	97	98.3
Q9DCS9	NADH dehydrogenase [ubiquinone] 1 beta subcomplex subunit 10 OS=Mus musculus OX=10090 GN=Ndufb10 PE=1 SV=3	59	11	42	11	176	21	8.03	128.46	102.1	98.3	99.6	100.2	101.5	98.3
P12023	Amyloid-beta precursor protein OS=Mus musculus OX=10090 GN=App PE=1 SV=3	24	17	51	15	770	86.7	4.79	157.42	97.4	96.9	99.2	100.3	102	104.2
P42567	Epidermal growth factor receptor substrate 15 OS=Mus musculus OX=10090 GN=Eps15 PE=1 SV=1	28	17	26	17	897	98.4	4.6	86.11	100.4	98.5	98.8	99.1	101.3	101.8
Q9Z1J3	Cysteine desulfurase, mitochondrial OS=Mus musculus OX=10090 GN=Nfs1 PE=1 SV=3	43	17	34	17	459	50.5	8.16	104.46	101.8	100.2	101.1	99.8	98.2	98.9
Q0VGU4	Neurosecretory protein VGF OS=Mus musculus OX=10090 GN=Vgf PE=1 SV=1	29	15	33	15	617	68.2	4.7	104.33	95.5	97.6	102.9	102.4	98.8	102.9
Q3TKT4	Transcription activator BRG1 OS=Mus musculus OX=10090 GN=Smarca4 PE=1 SV=1	13	19	33	14	1613	181.3	8	99.15	93.5	103	101.3	99.4	100.2	102.6
Q60780	Growth arrest-specific protein 7 OS=Mus musculus OX=10090 GN=Gas7 PE=1 SV=1	38	16	39	15	421	48.1	7.83	98.86	103.9	98.7	97.5	98.8	101.2	100
Q6IRU2	Tropomyosin alpha-4 chain OS=Mus musculus OX=10090 GN=Tpm4 PE=1 SV=3	51	19	41	11	248	28.5	4.68	96.31	97.7	101.1	105.4	100.2	95.8	99.9
Q6P8X1	Sorting nexin-6 OS=Mus musculus OX=10090 GN=Snx6 PE=1 SV=2	41	19	38	17	406	46.6	6.16	118.11	98.6	100.5	100.6	99.5	100.4	100.5
Q6KAR6	Exocyst complex component 3 OS=Mus musculus OX=10090 GN=Exoc3 PE=1 SV=2	24	17	26	17	755	86.4	6.2	79.53	100.6	102.5	98.1	99.9	99.4	99.6
Q91VC3	Eukaryotic initiation factor 4A-III OS=Mus musculus OX=10090 GN=Eif4a3 PE=1 SV=3	32	17	41	14	411	46.8	6.73	131.42	97	100.9	102	102.7	96.9	100.5
Q9R1P0	Proteasome subunit alpha type-4 OS=Mus musculus OX=10090 GN=Psma4 PE=1 SV=1	52	14	49	14	261	29.5	7.72	152.59	100	101.2	100.7	99.1	97.3	101.7
Q99MN1	Lysine--tRNA ligase OS=Mus musculus OX=10090 GN=Kars1 PE=1 SV=1	29	19	37	18	595	67.8	5.94	118.39	100.5	101.1	103.7	98.7	95.3	100.7
O35295	Transcriptional activator protein Pur-beta OS=Mus musculus OX=10090 GN=Purb PE=1 SV=3	36	17	47	14	324	33.9	5.43	125.87	97.5	104.1	101.6	100.8	94.6	101.4
Q80YR5	Scaffold attachment factor B2 OS=Mus musculus OX=10090 GN=Safb2 PE=1 SV=2	17	13	32	7	991	111.8	6.38	101.19	99	102	92.3	107.3	98	101.3
Q9JLI8	Squamous cell carcinoma antigen recognized by T-cells 3 OS=Mus musculus OX=10090 GN=Sart3 PE=1 SV=1	20	20	29	20	962	109.6	5.24	82.62	97.9	99.7	100.7	101.3	97.8	102.5
Q9CWK8	Sorting nexin-2 OS=Mus musculus OX=10090 GN=Snx2 PE=1 SV=2	25	14	27	13	519	58.4	5.12	93.63	100.9	99.9	100	100.2	100.1	98.9
Q8CCB4	Vacuolar protein sorting-associated protein 53 homolog OS=Mus musculus OX=10090 GN=Vps53 PE=1 SV=1	25	21	32	21	832	94.4	6.61	85.64	97.8	98.7	98.7	100.3	105.4	99.2
P58404	Striatin-4 OS=Mus musculus OX=10090 GN=Strn4 PE=1 SV=2	23	15	29	12	760	81.6	5.38	100.76	98.4	100.7	100.4	98.9	98.1	103.5
Q99MK8	Beta-adrenergic receptor kinase 1 OS=Mus musculus OX=10090 GN=Grk2 PE=1 SV=2	26	19	44	13	689	79.6	7.28	115.73	97.2	99.6	102	100.5	97.9	102.8
Q61481	Calcium/calmodulin-dependent 3',5'-cyclic nucleotide phosphodiesterase 1A OS=Mus musculus OX=10090 GN=Pde1a PE=1 SV=3	29	14	31	14	545	62.3	5.91	92.55	103.4	95.6	101	96.5	104.5	99
Q9CZC8	Secernin-1 OS=Mus musculus OX=10090 GN=Scrn1 PE=1 SV=1	32	13	46	13	414	46.3	4.79	167.74	103.6	98.5	98.3	99.9	100	99.8
P15532	Nucleoside diphosphate kinase A OS=Mus musculus OX=10090 GN=Nme1 PE=1 SV=1	80	12	50	7	152	17.2	7.37	172.34	97.2	101	101	102.2	100.9	97.6
Q8CHU3	Epsin-2 OS=Mus musculus OX=10090 GN=Epn2 PE=1 SV=1	31	17	31	16	595	63.4	8.16	103.32	104.6	103.2	100.1	95.9	96.3	99.8
Q3ULJ0	Glycerol-3-phosphate dehydrogenase 1-like protein OS=Mus musculus OX=10090 GN=Gpd1l PE=1 SV=2	37	14	38	12	351	38.2	6.77	123.54	102.2	99.5	99.7	101	100.7	96.8
Q8C167	Prolyl endopeptidase-like OS=Mus musculus OX=10090 GN=Prepl PE=1 SV=1	27	17	33	17	725	83.1	6.65	125.73	98.6	99.9	103.8	102.9	93.5	101.4
Q8BY87	Ubiquitin carboxyl-terminal hydrolase 47 OS=Mus musculus OX=10090 GN=Usp47 PE=1 SV=2	14	18	24	18	1376	157.4	5.11	69.1	95.3	99.8	99.5	105.1	98.2	102.1
Q8R3V5	Endophilin-B2 OS=Mus musculus OX=10090 GN=Sh3glb2 PE=1 SV=2	36	17	40	16	400	44.5	5.82	126.19	106.6	99	98.9	97.7	102.6	95.2
P10605	Cathepsin B OS=Mus musculus OX=10090 GN=Ctsb PE=1 SV=2	28	8	25	8	339	37.3	5.91	85.33	101	98.6	102	102.8	96.2	99.4
Q9QZF2	Glypican-1 OS=Mus musculus OX=10090 GN=Gpc1 PE=1 SV=1	32	15	29	15	557	61.3	7.05	109.84	96.2	102.6	100.9	98.5	97.4	104.4
P19157	Glutathione S-transferase P 1 OS=Mus musculus OX=10090 GN=Gstp1 PE=1 SV=2	46	8	34	8	210	23.6	7.87	119.21	106.2	96.4	94.7	95.7	107.7	99.2
Q8BHL5	Engulfment and cell motility protein 2 OS=Mus musculus OX=10090 GN=Elmo2 PE=1 SV=1	31	21	39	17	732	83.8	5.95	105.46	96.3	105.1	99.8	99.3	99.7	99.8
P61222	ATP-binding cassette sub-family E member 1 OS=Mus musculus OX=10090 GN=Abce1 PE=1 SV=1	27	16	32	16	599	67.3	8.34	95.57	96.4	101.2	100.9	100.5	97.9	103.2
P45952	Medium-chain specific acyl-CoA dehydrogenase, mitochondrial OS=Mus musculus OX=10090 GN=Acadm PE=1 SV=1	40	15	29	15	421	46.5	8.37	96.18	98.2	101.7	103.9	98.3	96.4	101.6
Q7TMF3	NADH dehydrogenase [ubiquinone] 1 alpha subcomplex subunit 12 OS=Mus musculus OX=10090 GN=Ndufa12 PE=1 SV=2	88	12	49	12	145	17.1	9.36	175.92	98.9	100.7	95.4	101.5	103.4	100
Q6Y685	Transforming acidic coiled-coil-containing protein 1 OS=Mus musculus OX=10090 GN=Tacc1 PE=1 SV=1	26	22	34	19	774	83.9	5.03	79.28	99.2	99	99.2	101.2	100.6	101
Q9JJV2	Profilin-2 OS=Mus musculus OX=10090 GN=Pfn2 PE=1 SV=3	50	10	95	10	140	15	6.99	283.38	98.7	103.2	98.3	99.9	98.8	101.1
Q80VP1	Epsin-1 OS=Mus musculus OX=10090 GN=Epn1 PE=1 SV=3	24	14	33	13	575	60.2	4.81	93.66	102.8	98.5	101.2	98.4	102.7	96.4
Q9ESZ8	General transcription factor II-I OS=Mus musculus OX=10090 GN=Gtf2i PE=1 SV=3	19	18	26	18	998	112.2	6.55	84.24	91.8	99.6	99.9	104.2	99.6	104.9
Q9R0Q6	Actin-related protein 2/3 complex subunit 1A OS=Mus musculus OX=10090 GN=Arpc1a PE=1 SV=1	53	19	46	19	370	41.6	8.18	130.41	100.2	103.7	97.6	98.4	101.9	98.1
P34152	Focal adhesion kinase 1 OS=Mus musculus OX=10090 GN=Ptk2 PE=1 SV=4	20	21	33	20	1052	119.2	6.62	91.61	99.2	99.1	100.7	100.3	98.7	102
P48758	Carbonyl reductase [NADPH] 1 OS=Mus musculus OX=10090 GN=Cbr1 PE=1 SV=3	60	16	50	15	277	30.6	8.31	143	103.3	100.8	99.8	99.7	97.2	99.3
Q5SW19	Clustered mitochondria protein homolog OS=Mus musculus OX=10090 GN=Cluh PE=1 SV=2	17	20	31	20	1315	148	6.02	90.5	96.3	98.9	104.3	101.1	98.2	101.2
Q9WV69	Dematin OS=Mus musculus OX=10090 GN=Dmtn PE=1 SV=1	40	15	42	14	405	45.4	8.41	117.51	105.9	102.4	95.4	95.4	104.6	96.3
P24270	Catalase OS=Mus musculus OX=10090 GN=Cat PE=1 SV=4	35	17	37	17	527	59.8	7.88	105.86	96.6	101.8	101.4	100.8	94.2	105.2
Q8BLY2	Threonine--tRNA ligase 2, cytoplasmic OS=Mus musculus OX=10090 GN=Tars3 PE=1 SV=1	21	16	29	15	790	91.3	7.53	83.17	99.8	101.5	102.9	98.9	98.2	98.7
P61750	ADP-ribosylation factor 4 OS=Mus musculus OX=10090 GN=Arf4 PE=1 SV=2	68	10	39	4	180	20.4	7.14	133.79	97.9	102.3	102.5	100.4	97.4	99.6
Q9CX86	Heterogeneous nuclear ribonucleoprotein A0 OS=Mus musculus OX=10090 GN=Hnrnpa0 PE=1 SV=1	44	11	26	10	305	30.5	9.31	85.18	98.2	99.8	99.4	105.5	96.2	101
Q91V61	Sideroflexin-3 OS=Mus musculus OX=10090 GN=Sfxn3 PE=1 SV=1	43	11	41	11	321	35.4	9.51	146.05	99.3	97.5	100.9	102.9	101	98.4
Q9D8Y0	EF-hand domain-containing protein D2 OS=Mus musculus OX=10090 GN=Efhd2 PE=1 SV=1	48	13	30	13	240	26.8	5.06	93.56	103.9	95.3	100.5	103	104.1	93.2
Q8BFZ9	Erlin-2 OS=Mus musculus OX=10090 GN=Erlin2 PE=1 SV=1	42	15	26	10	340	37.8	5.5	80.94	96.3	100.2	103.2	99.3	97.2	103.7
P32067	Lupus La protein homolog OS=Mus musculus OX=10090 GN=Ssb PE=1 SV=1	44	20	40	19	415	47.7	9.77	108.26	98.7	100.5	102.7	102.4	95.3	100.3
Q05D44	Eukaryotic translation initiation factor 5B OS=Mus musculus OX=10090 GN=Eif5b PE=1 SV=2	17	21	36	21	1216	137.5	5.59	94.9	93.5	102.1	102.9	103.1	100.1	98.4
P54823	Probable ATP-dependent RNA helicase DDX6 OS=Mus musculus OX=10090 GN=Ddx6 PE=1 SV=1	31	13	29	13	483	54.2	8.66	107.22	96.9	99.2	100.5	101.7	100.6	100.9
Q3UYC0	Protein phosphatase 1H OS=Mus musculus OX=10090 GN=Ppm1h PE=1 SV=1	31	15	35	15	513	56.3	6.73	103.74	100.6	99.3	101.1	98.3	101.2	99.5
Q80XA6	RalBP1-associated Eps domain-containing protein 2 OS=Mus musculus OX=10090 GN=Reps2 PE=1 SV=2	25	12	27	11	647	70.4	7.25	93.21	98.8	96.5	100.4	100.1	102.9	101.2
P62754	40S ribosomal protein S6 OS=Mus musculus OX=10090 GN=Rps6 PE=1 SV=1	41	15	42	14	249	28.7	10.84	115.18	96.8	103.8	102.9	103	93.8	99.8
Q61584	Fragile X mental retardation syndrome-related protein 1 OS=Mus musculus OX=10090 GN=Fxr1 PE=1 SV=2	28	18	38	16	677	76.2	6.98	108.52	98.1	101.2	103.4	100.1	97.2	100
A2A8L5	Receptor-type tyrosine-protein phosphatase F OS=Mus musculus OX=10090 GN=Ptprf PE=1 SV=1	12	17	35	9	1898	211.4	6.65	92.35	93.7	99.3	105.5	101.4	99.2	100.9
Q99LX0	Parkinson disease protein 7 homolog OS=Mus musculus OX=10090 GN=Park7 PE=1 SV=1	46	11	59	11	189	20	6.77	180.14	103.7	101.4	99.3	97.2	97.9	100.4
O55234	Proteasome subunit beta type-5 OS=Mus musculus OX=10090 GN=Psmb5 PE=1 SV=3	45	15	41	15	264	28.5	7.02	128.21	99.2	100.5	101.5	100.1	98.6	100.2
P57746	V-type proton ATPase subunit D OS=Mus musculus OX=10090 GN=Atp6v1d PE=1 SV=1	63	18	41	18	247	28.4	9.45	112.56	101.1	100.3	99.5	100.3	99.8	99.1
P15209	BDNF/NT-3 growth factors receptor OS=Mus musculus OX=10090 GN=Ntrk2 PE=1 SV=1	21	15	28	8	821	92.1	6.55	85.28	95.5	104.5	104.3	97.1	100.4	98.2
Q8BJ71	Nuclear pore complex protein Nup93 OS=Mus musculus OX=10090 GN=Nup93 PE=1 SV=1	23	19	36	19	819	93.2	5.72	98.77	96.9	98.9	100.4	102.6	98.8	102.4
P22892	AP-1 complex subunit gamma-1 OS=Mus musculus OX=10090 GN=Ap1g1 PE=1 SV=3	24	23	50	20	822	91.3	6.8	147.23	97.6	100.4	100.8	101.8	100.5	98.9
P46664	Adenylosuccinate synthetase isozyme 2 OS=Mus musculus OX=10090 GN=Adss2 PE=1 SV=2	36	15	28	14	456	50	6.38	86.64	99.7	100.9	102.8	100.4	96.6	99.6
P62071	Ras-related protein R-Ras2 OS=Mus musculus OX=10090 GN=Rras2 PE=1 SV=1	55	12	42	10	204	23.4	6.01	109.29	100	103	100.8	98.3	94.7	103.3
Q6P542	ATP-binding cassette sub-family F member 1 OS=Mus musculus OX=10090 GN=Abcf1 PE=1 SV=1	24	17	25	17	837	94.9	6.51	69.45	94.1	98.2	105.1	104.6	96.8	101.2
P83741	Serine/threonine-protein kinase WNK1 OS=Mus musculus OX=10090 GN=Wnk1 PE=1 SV=2	9	22	31	16	2377	250.8	6.43	76.55	103.5	100.9	98.6	99.1	98.6	99.3
P51859	Hepatoma-derived growth factor OS=Mus musculus OX=10090 GN=Hdgf PE=1 SV=2	44	13	28	12	237	26.3	4.83	86.45	103.8	100	101.8	102.2	96.8	95.3
Q5XJV6	Serine/threonine-protein kinase LMTK3 OS=Mus musculus OX=10090 GN=Lmtk3 PE=1 SV=1	15	16	26	16	1424	150.8	4.88	72.7	94.2	102.8	100.3	101	98	103.7
Q9QUI0	Transforming protein RhoA OS=Mus musculus OX=10090 GN=Rhoa PE=1 SV=1	39	9	45	3	193	21.8	6.1	143.73	101.2	100.6	101.3	96.5	99.2	101.3
Q9DCT2	NADH dehydrogenase [ubiquinone] iron-sulfur protein 3, mitochondrial OS=Mus musculus OX=10090 GN=Ndufs3 PE=1 SV=2	44	13	46	13	263	30.1	7.17	152.36	99.5	98.8	99.1	101.7	101.7	99.2
Q5XJY5	Coatomer subunit delta OS=Mus musculus OX=10090 GN=Arcn1 PE=1 SV=2	30	15	30	15	511	57.2	6.21	77.56	95.5	102.8	99.8	101.8	95.5	104.6
P70663	SPARC-like protein 1 OS=Mus musculus OX=10090 GN=Sparcl1 PE=1 SV=3	29	15	28	15	650	72.2	4.6	85.59	93.9	94.4	101.3	103.6	105.9	101
Q8C5H8	NAD kinase 2, mitochondrial OS=Mus musculus OX=10090 GN=Nadk2 PE=1 SV=2	36	13	34	13	452	50.8	8.07	124.02	99.2	100.6	100	98.9	102.2	99.1
A2A432	Cullin-4B OS=Mus musculus OX=10090 GN=Cul4b PE=1 SV=1	19	20	27	12	970	110.6	8.37	86.8	98.9	99.9	101.7	99.9	100.8	98.9
Q0VE82	Copine-7 OS=Mus musculus OX=10090 GN=Cpne7 PE=1 SV=1	31	14	25	13	557	61.9	5.4	94.14	101.9	93.2	99.7	98.4	101	105.8
P62983	Ubiquitin-40S ribosomal protein S27a OS=Mus musculus OX=10090 GN=Rps27a PE=1 SV=2	68	11	148	3	156	17.9	9.64	423.96	107.1	101.6	101.9	98.5	94.5	96.5
Q61166	Microtubule-associated protein RP/EB family member 1 OS=Mus musculus OX=10090 GN=Mapre1 PE=1 SV=3	57	14	35	13	268	30	5.22	116.25	99.4	101.6	104.4	100.6	95.1	99
Q9QY76	Vesicle-associated membrane protein-associated protein B OS=Mus musculus OX=10090 GN=Vapb PE=1 SV=3	50	12	28	11	243	26.9	7.78	93.28	102.6	99.6	99.9	100.3	98	99.6
P43406	Integrin alpha-V OS=Mus musculus OX=10090 GN=Itgav PE=1 SV=2	19	18	29	18	1044	115.3	5.63	82.72	96.6	99.1	99.9	101.2	102.1	101.2
P54923	[Protein ADP-ribosylarginine] hydrolase OS=Mus musculus OX=10090 GN=Adprh PE=1 SV=1	38	14	38	14	362	40	5.76	111.37	97.4	98.6	101.5	101	96.7	104.9
Q3U0M1	Trafficking protein particle complex subunit 9 OS=Mus musculus OX=10090 GN=Trappc9 PE=1 SV=2	14	18	28	18	1148	128.2	6.47	80.85	98.5	98.3	101.9	100.4	99.1	101.8
Q8K183	Pyridoxal kinase OS=Mus musculus OX=10090 GN=Pdxk PE=1 SV=1	43	12	36	12	312	35	6.29	127.61	101.7	95.1	99.4	103.4	102	98.3
P57722	Poly(rC)-binding protein 3 OS=Mus musculus OX=10090 GN=Pcbp3 PE=1 SV=3	38	10	32	5	371	39.3	7.52	108.29	92.7	102.4	105.5	107.6	92	99.8
P15116	Cadherin-2 OS=Mus musculus OX=10090 GN=Cdh2 PE=1 SV=2	24	16	26	16	906	99.7	4.78	82.23	99.8	98.1	99	101.7	102.2	99.2
Q3URD3	Sarcolemmal membrane-associated protein OS=Mus musculus OX=10090 GN=Slmap PE=1 SV=2	20	18	35	17	845	96.9	5.33	91.16	98.4	101.2	102	97.8	98.4	102.1
Q60790	Ras GTPase-activating protein 3 OS=Mus musculus OX=10090 GN=Rasa3 PE=1 SV=2	24	18	28	17	834	95.9	7.34	82.29	102.9	96.7	98.7	100.6	99.9	101.2
A2AP18	1-phosphatidylinositol 4,5-bisphosphate phosphodiesterase eta-2 OS=Mus musculus OX=10090 GN=Plch2 PE=1 SV=2	14	20	30	19	1501	164.2	7.49	90.53	102.8	96.5	98.9	97.4	103.4	101
P49443	Protein phosphatase 1A OS=Mus musculus OX=10090 GN=Ppm1a PE=1 SV=1	44	14	28	12	382	42.4	5.36	103.13	102.2	98.6	99.5	98.5	99.6	101.6
Q9Z1N5	Spliceosome RNA helicase Ddx39b OS=Mus musculus OX=10090 GN=Ddx39b PE=1 SV=1	39	20	39	20	428	49	5.67	111.31	98.8	100.7	107.1	100.7	94.3	98.3
P08414	Calcium/calmodulin-dependent protein kinase type IV OS=Mus musculus OX=10090 GN=Camk4 PE=1 SV=2	32	19	39	19	469	52.6	4.93	101.46	96.5	102.6	100.3	104.1	93.9	102.6
Q5SRX1	TOM1-like protein 2 OS=Mus musculus OX=10090 GN=Tom1l2 PE=1 SV=1	30	13	31	13	507	55.6	4.82	106.74	101.7	97.7	98.5	100.8	100.7	100.7
Q8R0A7	Uncharacterized protein KIAA0513 OS=Mus musculus OX=10090 GN=Kiaa0513 PE=1 SV=1	35	16	30	16	407	46.3	5.02	85.9	100.6	98.8	97.8	100.3	103	99.5
Q63810	Calcineurin subunit B type 1 OS=Mus musculus OX=10090 GN=Ppp3r1 PE=1 SV=3	51	9	50	9	170	19.3	4.81	173.63	102.6	104.9	100.1	93.9	101.8	96.8
P70429	Ena/VASP-like protein OS=Mus musculus OX=10090 GN=Evl PE=1 SV=2	34	12	29	12	414	44.3	8.85	76.63	97.4	98.8	103.5	102.2	97.3	100.8
Q3UTQ8	Cyclin-dependent kinase-like 5 OS=Mus musculus OX=10090 GN=Cdkl5 PE=1 SV=1	20	18	28	18	938	105.4	9.58	83.05	98.1	99.8	99.1	100.3	98.8	103.9
Q9WTS6	Teneurin-3 OS=Mus musculus OX=10090 GN=Tenm3 PE=1 SV=1	9	21	36	16	2715	302.9	6.51	79.1	94.1	96.9	97.5	108.1	101.3	102.1
Q9Z0S1	3'(2'),5'-bisphosphate nucleotidase 1 OS=Mus musculus OX=10090 GN=Bpnt1 PE=1 SV=2	47	12	22	12	308	33.2	5.82	87.41	100.2	100	95.6	100.4	102.2	101.5
E9QAT4	Protein transport protein Sec16A OS=Mus musculus OX=10090 GN=Sec16a PE=1 SV=1	10	19	24	19	2357	254	5.81	67.65	93.3	98.6	98.7	104.3	101	104
Q9QZE5	Coatomer subunit gamma-1 OS=Mus musculus OX=10090 GN=Copg1 PE=1 SV=1	19	16	37	12	874	97.5	5.35	113.7	98.5	101.8	101.8	102.7	95.5	99.7
Q8CDN6	Thioredoxin-like protein 1 OS=Mus musculus OX=10090 GN=Txnl1 PE=1 SV=3	51	9	36	9	289	32.2	4.96	147.73	101.1	98	101.1	98.3	97.1	104.5
Q9R1V4	Disintegrin and metalloproteinase domain-containing protein 11 OS=Mus musculus OX=10090 GN=Adam11 PE=1 SV=2	26	13	24	13	773	84.1	7.5	80.12	106	93	102.9	98.5	104.2	95.4
Q64010	Adapter molecule crk OS=Mus musculus OX=10090 GN=Crk PE=1 SV=1	45	14	42	14	304	33.8	5.55	141.51	98.6	97.8	100.8	98.7	103.3	100.9
Q9DBP5	UMP-CMP kinase OS=Mus musculus OX=10090 GN=Cmpk1 PE=1 SV=1	62	12	33	12	196	22.2	5.83	108.01	98.4	100.4	99.8	99.3	98.8	103.4
P84096	Rho-related GTP-binding protein RhoG OS=Mus musculus OX=10090 GN=Rhog PE=1 SV=1	48	9	35	8	191	21.3	8.12	129.25	109.7	88.8	93.5	91.5	113.1	103.3
P28798	Progranulin OS=Mus musculus OX=10090 GN=Grn PE=1 SV=2	20	8	26	8	589	63.4	6.8	91.48	99.6	94.1	107.9	93.7	95.6	109.1
Q8K3G9	DCC-interacting protein 13-beta OS=Mus musculus OX=10090 GN=Appl2 PE=1 SV=1	32	16	26	15	662	73.8	5.03	81.47	100.2	98.4	98.9	99.4	99.3	103.8
Q8R016	Bleomycin hydrolase OS=Mus musculus OX=10090 GN=Blmh PE=1 SV=1	38	14	38	14	455	52.5	6.48	111.91	99.3	99.1	102.7	100.1	98.3	100.6
O35345	Importin subunit alpha-7 OS=Mus musculus OX=10090 GN=Kpna6 PE=1 SV=2	26	15	34	9	536	59.9	4.94	104.38	98.4	98.2	101.4	99.2	98.9	103.9
O88910	MAGUK p55 subfamily member 3 OS=Mus musculus OX=10090 GN=Mpp3 PE=1 SV=2	34	18	20	18	568	64.4	6.34	67.69	102.4	103.5	97	93.4	101.9	101.8
Q99PJ0	Neurotrimin OS=Mus musculus OX=10090 GN=Ntm PE=1 SV=2	39	14	40	13	344	38	7.81	118.94	101.4	96.6	98.8	102.4	104.7	96.1
Q8BL65	Actin-binding LIM protein 2 OS=Mus musculus OX=10090 GN=Ablim2 PE=1 SV=1	36	18	35	17	612	68.1	8.02	90.93	104.5	99	97.5	97.9	104.3	96.9
Q9JIF0	Protein arginine N-methyltransferase 1 OS=Mus musculus OX=10090 GN=Prmt1 PE=1 SV=1	34	13	21	11	371	42.4	5.43	85.94	94.4	99.9	104.7	104.1	97.5	99.3
Q6P5F9	Exportin-1 OS=Mus musculus OX=10090 GN=Xpo1 PE=1 SV=1	17	16	37	16	1071	123	6.07	114.25	96.3	100.3	101.9	102.2	100.2	99.1
Q91ZZ3	Beta-synuclein OS=Mus musculus OX=10090 GN=Sncb PE=1 SV=1	54	8	35	3	133	14	4.37	145.04	105.5	96.2	95.9	102.5	100.2	99.6
Q9DBR3	Armadillo repeat-containing protein 8 OS=Mus musculus OX=10090 GN=Armc8 PE=1 SV=2	20	14	21	14	673	75.3	6.73	66.03	98.2	102.1	99	100.1	98.7	101.8
D3YXJ0	Diacylglycerol kinase eta OS=Mus musculus OX=10090 GN=Dgkh PE=1 SV=2	17	21	37	18	1211	134	6.52	95.68	98	104.5	95.6	102.4	99	100.5
P23506	Protein-L-isoaspartate(D-aspartate) O-methyltransferase OS=Mus musculus OX=10090 GN=Pcmt1 PE=1 SV=3	52	13	30	13	227	24.6	7.65	103.04	100.3	99	99.9	97.7	104	99.1
P24369	Peptidyl-prolyl cis-trans isomerase B OS=Mus musculus OX=10090 GN=Ppib PE=1 SV=2	53	14	51	13	216	23.7	9.55	113.95	98.8	101.7	108.9	99.8	91.6	99.2
Q8BML9	Glutamine--tRNA ligase OS=Mus musculus OX=10090 GN=Qars1 PE=1 SV=1	25	19	31	18	775	87.6	7.31	80.54	99.9	100.9	100.3	99.5	99.1	100.3
O88307	Sortilin-related receptor OS=Mus musculus OX=10090 GN=Sorl1 PE=1 SV=3	8	17	26	17	2215	246.9	5.54	75.51	93.8	101.6	101.3	101.8	98.3	103.2
Q9JIX8	Apoptotic chromatin condensation inducer in the nucleus OS=Mus musculus OX=10090 GN=Acin1 PE=1 SV=3	13	17	28	17	1338	150.6	5.91	92.79	97	99.2	102.7	100.4	100.4	100.3
Q8R1A4	Dedicator of cytokinesis protein 7 OS=Mus musculus OX=10090 GN=Dock7 PE=1 SV=3	10	20	22	18	2130	241.3	6.71	60.1	98.7	100.4	102.2	97.3	99.9	101.6
Q9WUM5	Succinate--CoA ligase [ADP/GDP-forming] subunit alpha, mitochondrial OS=Mus musculus OX=10090 GN=Suclg1 PE=1 SV=4	28	9	34	9	346	36.1	9.39	103.17	102.2	100.9	100.1	96.9	104.7	95.1
P51855	Glutathione synthetase OS=Mus musculus OX=10090 GN=Gss PE=1 SV=1	36	17	25	17	474	52.2	5.8	70.25	102.1	97.6	100.2	96.8	102.2	101.1
Q8K4I3	Rho guanine nucleotide exchange factor 6 OS=Mus musculus OX=10090 GN=Arhgef6 PE=1 SV=1	19	15	37	12	771	87	5.87	92.01	103.5	99.8	97.4	95.4	103.2	100.7
Q91YP2	Neurolysin, mitochondrial OS=Mus musculus OX=10090 GN=Nln PE=1 SV=1	26	18	30	17	704	80.4	6.44	84.52	97.3	98.8	98.9	106.8	95	103.1
P61226	Ras-related protein Rap-2b OS=Mus musculus OX=10090 GN=Rap2b PE=1 SV=1	56	11	37	7	183	20.5	4.81	114.06	103.1	101.4	98.9	98.1	102.2	96.4
Q810J8	Zinc finger FYVE domain-containing protein 1 OS=Mus musculus OX=10090 GN=Zfyve1 PE=1 SV=2	27	19	37	19	777	86.9	7.34	105.84	98.9	97.6	99.4	99.8	101.7	102.7
Q9DC51	Guanine nucleotide-binding protein G(i) subunit alpha-3 OS=Mus musculus OX=10090 GN=Gnai3 PE=1 SV=3	36	13	38	6	354	40.5	5.69	114.6	96.3	101.8	97.5	101.4	102.8	100.2
Q91VE0	Long-chain fatty acid transport protein 4 OS=Mus musculus OX=10090 GN=Slc27a4 PE=1 SV=1	24	16	26	15	643	72.3	8.59	75.54	97.8	100.1	100.2	104.5	96	101.4
Q6PAK3	Protein arginine N-methyltransferase 8 OS=Mus musculus OX=10090 GN=Prmt8 PE=1 SV=2	36	13	24	11	394	45.2	6.93	92.33	94.5	102.4	102.9	99.3	98.9	102
Q9EPR5	VPS10 domain-containing receptor SorCS2 OS=Mus musculus OX=10090 GN=Sorcs2 PE=1 SV=2	16	17	29	17	1159	128.8	7.34	83.69	94.4	99.1	102.1	102.6	99.6	102.2
Q8VCT3	Aminopeptidase B OS=Mus musculus OX=10090 GN=Rnpep PE=1 SV=2	29	17	29	17	650	72.4	5.35	104.5	96.6	97.5	95.9	99.2	111.3	99.6
Q8C2Q3	RNA-binding protein 14 OS=Mus musculus OX=10090 GN=Rbm14 PE=1 SV=1	28	16	39	16	669	69.4	9.67	98.13	96.1	100.7	102	103.6	98.4	99.1
Q00612	Glucose-6-phosphate 1-dehydrogenase X OS=Mus musculus OX=10090 GN=G6pdx PE=1 SV=3	36	19	47	19	515	59.2	6.49	146.43	101.7	99	98.9	100.1	100	100.3
Q3UH99	Protein shisa-6 OS=Mus musculus OX=10090 GN=Shisa6 PE=1 SV=1	29	14	28	14	525	58.4	9.48	80.06	96	103.3	102.6	95.3	98.4	104.3
Q7M6Y3	Phosphatidylinositol-binding clathrin assembly protein OS=Mus musculus OX=10090 GN=Picalm PE=1 SV=1	16	14	27	13	660	71.5	7.91	69.78	98.6	99.1	99.9	100.7	101.4	100.3
Q6PER3	Microtubule-associated protein RP/EB family member 3 OS=Mus musculus OX=10090 GN=Mapre3 PE=1 SV=1	34	13	57	11	281	31.9	5.54	189.12	100.6	99.4	100	99.5	99.8	100.7
Q6ZWX6	Eukaryotic translation initiation factor 2 subunit 1 OS=Mus musculus OX=10090 GN=Eif2s1 PE=1 SV=3	50	15	34	15	315	36.1	5.08	112.86	97.8	101.3	103	99.8	95.9	102.1
Q8CH09	SURP and G-patch domain-containing protein 2 OS=Mus musculus OX=10090 GN=Sugp2 PE=1 SV=2	16	19	26	19	1067	118	8.31	70.66	94.2	100.7	101.5	99.5	97.8	106.2
Q5SYD0	Unconventional myosin-Id OS=Mus musculus OX=10090 GN=Myo1d PE=1 SV=1	21	19	31	19	1006	116	9.41	91.37	116.7	86.9	90.4	87.8	115.3	102.8
Q80U35	Rho guanine nucleotide exchange factor 17 OS=Mus musculus OX=10090 GN=Arhgef17 PE=1 SV=2	11	18	29	18	2057	221.5	6.3	70.31	93.3	98.6	99	99.3	99.7	110.2
Q8R3Z5	Voltage-dependent L-type calcium channel subunit beta-1 OS=Mus musculus OX=10090 GN=Cacnb1 PE=1 SV=1	21	11	27	6	597	65.4	6.62	97.19	99.2	100.4	98.4	99.8	102.1	100.1
P47934	Carnitine O-acetyltransferase OS=Mus musculus OX=10090 GN=Crat PE=1 SV=3	25	17	28	17	626	70.8	8.44	78.13	100.3	98.3	100.2	101.7	100.7	98.7
Q8VBY2	Calcium/calmodulin-dependent protein kinase kinase 1 OS=Mus musculus OX=10090 GN=Camkk1 PE=1 SV=1	30	13	24	13	505	55.8	5.99	68.44	98.6	100.9	98.4	97.2	105.6	99.4
Q9CQD1	Ras-related protein Rab-5A OS=Mus musculus OX=10090 GN=Rab5a PE=1 SV=1	51	9	30	5	215	23.6	8.15	89.85	102.1	102	100.3	97.7	97.7	100.2
Q63932	Dual specificity mitogen-activated protein kinase kinase 2 OS=Mus musculus OX=10090 GN=Map2k2 PE=1 SV=2	35	15	42	8	401	44.4	7.05	121.89	101.4	99.9	99.3	100.3	97.6	101.6
Q9QYJ0	DnaJ homolog subfamily A member 2 OS=Mus musculus OX=10090 GN=Dnaja2 PE=1 SV=1	32	13	48	13	412	45.7	6.48	145.53	100.7	99.7	102.5	99.8	98	99.2
A2RT62	F-box/LRR-repeat protein 16 OS=Mus musculus OX=10090 GN=Fbxl16 PE=1 SV=1	30	11	43	11	479	51.8	6.6	174.3	98.3	97.7	100.5	98.3	104.7	100.5
Q9EP69	Phosphatidylinositol-3-phosphatase SAC1 OS=Mus musculus OX=10090 GN=Sacm1l PE=1 SV=1	28	17	36	17	587	66.9	7.3	115.61	98.7	98	101.3	101.9	100	100.1
Q921F2	TAR DNA-binding protein 43 OS=Mus musculus OX=10090 GN=Tardbp PE=1 SV=1	37	13	39	13	414	44.5	6.7	116.26	99	102.2	102.4	103.3	94.4	98.7
Q64378	Peptidyl-prolyl cis-trans isomerase FKBP5 OS=Mus musculus OX=10090 GN=Fkbp5 PE=1 SV=1	34	17	24	17	456	50.9	7.8	70.43	93.2	102.1	99.4	99.3	102.5	103.4
Q8BFU3	RING finger protein 214 OS=Mus musculus OX=10090 GN=Rnf214 PE=1 SV=1	25	18	28	18	668	73.6	6.23	64.6	98.3	99.4	103.7	99.8	98.8	100
Q6PDM2	Serine/arginine-rich splicing factor 1 OS=Mus musculus OX=10090 GN=Srsf1 PE=1 SV=3	48	14	51	13	248	27.7	10.36	157.62	97.6	99.8	102.2	101.9	96.5	102.1
Q3V3V9	Capping protein, Arp2/3 and myosin-I linker protein 2 OS=Mus musculus OX=10090 GN=Carmil2 PE=1 SV=2	15	14	29	14	1296	141.3	7.18	91.72	100.6	94.9	99.3	97.7	101.7	105.8
Q69ZK9	Neuroligin-2 OS=Mus musculus OX=10090 GN=Nlgn2 PE=1 SV=2	18	12	21	8	836	90.9	6.18	83.61	99.5	99.2	98.8	99.2	103.7	99.6
Q8CGU1	Calcium-binding and coiled-coil domain-containing protein 1 OS=Mus musculus OX=10090 GN=Calcoco1 PE=1 SV=2	24	14	30	14	691	77.2	4.82	93.61	101.1	99.1	96.7	101.2	104	97.8
O54865	Guanylate cyclase soluble subunit beta-1 OS=Mus musculus OX=10090 GN=Gucy1b1 PE=1 SV=1	26	16	34	16	620	70.6	5.31	100.94	103.6	97.4	98.7	101.6	99.6	99.1
P10711	Transcription elongation factor A protein 1 OS=Mus musculus OX=10090 GN=Tcea1 PE=1 SV=2	50	14	28	14	301	33.9	8.38	82.76	93.8	99.1	101.4	98.7	105.5	101.4
Q9D2M8	Ubiquitin-conjugating enzyme E2 variant 2 OS=Mus musculus OX=10090 GN=Ube2v2 PE=1 SV=4	71	11	50	5	145	16.4	8.09	155.71	105.6	101	98.3	96.6	98.4	100.2
P97797	Tyrosine-protein phosphatase non-receptor type substrate 1 OS=Mus musculus OX=10090 GN=Sirpa PE=1 SV=2	32	12	27	12	513	56.4	8.28	107.8	103.2	96.8	97.4	100.5	107.4	94.6
Q64133	Amine oxidase [flavin-containing] A OS=Mus musculus OX=10090 GN=Maoa PE=1 SV=3	26	15	30	14	526	59.6	7.81	101.85	97.3	97.4	102.5	102.5	98.6	101.7
A2APV2	Formin-like protein 2 OS=Mus musculus OX=10090 GN=Fmnl2 PE=1 SV=2	18	21	32	18	1086	123	7.53	72.83	93.1	94.5	104.1	102.8	104.5	101
P47809	Dual specificity mitogen-activated protein kinase kinase 4 OS=Mus musculus OX=10090 GN=Map2k4 PE=1 SV=2	39	14	24	14	397	44.1	8.07	75	98.2	100.3	101.7	99.9	100.1	99.9
Q9D2U9	H2B.U histone 2 OS=Mus musculus OX=10090 GN=H2bu2 PE=1 SV=3	59	10	56	2	126	14	10.37	158.25	97.1	101	102.2	104.6	95.1	100.2
Q91WS0	CDGSH iron-sulfur domain-containing protein 1 OS=Mus musculus OX=10090 GN=Cisd1 PE=1 SV=1	58	7	25	7	108	12.1	9.06	100.18	98.2	96	98.7	102.4	102.8	101.9
P59279	Ras-related protein Rab-2B OS=Mus musculus OX=10090 GN=Rab2b PE=1 SV=1	41	8	37	2	216	24.2	6.68	137.29	95.5	101.3	100.6	98.7	104.6	99.3
Q8R050	Eukaryotic peptide chain release factor GTP-binding subunit ERF3A OS=Mus musculus OX=10090 GN=Gspt1 PE=1 SV=2	27	19	41	7	636	68.6	5.21	108.18	98.8	103.1	101	97.4	99	100.7
Q6ZQ58	La-related protein 1 OS=Mus musculus OX=10090 GN=Larp1 PE=1 SV=3	22	18	28	18	1072	121.1	8.79	67.1	99.3	100.3	100.3	101.3	101.8	97
Q61171	Peroxiredoxin-2 OS=Mus musculus OX=10090 GN=Prdx2 PE=1 SV=3	63	11	68	11	198	21.8	5.41	290.18	98.7	99.7	101.7	99.5	101.7	98.8
O88712	C-terminal-binding protein 1 OS=Mus musculus OX=10090 GN=Ctbp1 PE=1 SV=2	34	14	35	10	441	47.7	6.77	117.7	100.7	99.7	102.4	98.1	102.7	96.4
Q3UHD6	Sorting nexin-27 OS=Mus musculus OX=10090 GN=Snx27 PE=1 SV=2	26	14	28	14	539	61	6.4	103	97.9	98.4	100.2	102.2	101.6	99.7
Q08460	Calcium-activated potassium channel subunit alpha-1 OS=Mus musculus OX=10090 GN=Kcnma1 PE=1 SV=2	12	13	28	13	1209	134.3	7.15	91.19	100.4	98	98.1	99.8	104.3	99.4
Q9D8U8	Sorting nexin-5 OS=Mus musculus OX=10090 GN=Snx5 PE=1 SV=1	42	17	27	15	404	46.8	6.62	85.14	98.5	99.2	102.8	99.5	100	100.1
Q9Z2A0	3-phosphoinositide-dependent protein kinase 1 OS=Mus musculus OX=10090 GN=Pdpk1 PE=1 SV=2	27	13	28	13	559	63.7	7.37	85.88	99.4	99.4	101.5	99.8	99.2	100.8
Q8R5H1	Ubiquitin carboxyl-terminal hydrolase 15 OS=Mus musculus OX=10090 GN=Usp15 PE=1 SV=1	20	19	35	18	981	112.3	5.17	98.93	95.2	98.4	101.8	101.1	101.5	101.9
Q00623	Apolipoprotein A-I OS=Mus musculus OX=10090 GN=Apoa1 PE=1 SV=2	48	14	30	14	264	30.6	5.73	91.6	103.5	107.9	88.5	104.2	90.7	105.2
Q9EQZ6	Rap guanine nucleotide exchange factor 4 OS=Mus musculus OX=10090 GN=Rapgef4 PE=1 SV=1	17	19	40	19	1011	115.4	6.92	104.94	101	99	100.3	98.8	102.1	98.8
Q5SVL6	Rap1 GTPase-activating protein 2 OS=Mus musculus OX=10090 GN=Rap1gap2 PE=1 SV=1	26	16	24	15	712	78.2	6.43	79.09	102.3	98	100.1	102.6	99.5	97.5
Q8R2Y0	Monoacylglycerol lipase ABHD6 OS=Mus musculus OX=10090 GN=Abhd6 PE=1 SV=1	32	10	22	10	336	38.2	8.47	92.97	94.2	103.4	102.3	103.5	94.7	101.9
E9Q6P5	Tetratricopeptide repeat protein 7B OS=Mus musculus OX=10090 GN=Ttc7b PE=1 SV=1	24	20	32	20	843	94.1	6.9	88.27	103.2	97.8	100	100.1	98.4	100.5
P35278	Ras-related protein Rab-5C OS=Mus musculus OX=10090 GN=Rab5c PE=1 SV=2	57	10	29	7	216	23.4	8.41	83.14	98.8	100.8	99.2	101.9	97	102.3
Q922Q4	Pyrroline-5-carboxylate reductase 2 OS=Mus musculus OX=10090 GN=Pycr2 PE=1 SV=1	40	12	27	12	320	33.6	7.77	86.98	96.6	103	103.7	100.4	94.1	102.3
Q60631	Growth factor receptor-bound protein 2 OS=Mus musculus OX=10090 GN=Grb2 PE=1 SV=1	59	14	32	14	217	25.2	6.32	103.2	101.5	100.7	101	98.1	97.8	100.9
P97798	Neogenin OS=Mus musculus OX=10090 GN=Neo1 PE=1 SV=1	13	16	30	16	1493	163.1	6.47	83.52	99.6	100.9	96.1	101.1	97.9	104.3
Q6IRU5	Clathrin light chain B OS=Mus musculus OX=10090 GN=Cltb PE=1 SV=1	41	13	50	13	229	25.2	4.63	163.52	104.4	99.7	100	99.1	97.8	99
P62264	40S ribosomal protein S14 OS=Mus musculus OX=10090 GN=Rps14 PE=1 SV=3	41	8	31	8	151	16.3	10.05	126.97	95.7	101.7	103.1	100.6	93.9	105.1
Q64012	RNA-binding protein Raly OS=Mus musculus OX=10090 GN=Raly PE=1 SV=3	52	14	28	14	312	33.2	8.84	83.4	92.8	99.5	101.8	106	98.5	101.4
Q61330	Contactin-2 OS=Mus musculus OX=10090 GN=Cntn2 PE=1 SV=2	19	17	25	17	1040	113.1	7.62	58.88	100.6	90.8	95.7	96.5	97.3	119.1
Q8R164	Valacyclovir hydrolase OS=Mus musculus OX=10090 GN=Bphl PE=1 SV=1	45	12	22	12	291	32.8	8.94	83.31	101.3	111.3	92.5	94.3	96.8	103.8
Q2NL51	Glycogen synthase kinase-3 alpha OS=Mus musculus OX=10090 GN=Gsk3a PE=1 SV=2	26	11	29	4	490	51.6	8.81	91.45	99.5	103.3	97.9	100.5	98.6	100.3
P28028	Serine/threonine-protein kinase B-raf OS=Mus musculus OX=10090 GN=Braf PE=1 SV=4	24	16	37	11	751	82.5	7.68	105.4	100.3	99.4	100	99.9	101.9	98.6
Q8R3Q2	Serine/threonine-protein phosphatase 6 regulatory subunit 2 OS=Mus musculus OX=10090 GN=Ppp6r2 PE=1 SV=1	20	14	27	14	923	100.4	4.82	98.61	99.4	99.3	100.8	97.7	99	104
Q8BP67	60S ribosomal protein L24 OS=Mus musculus OX=10090 GN=Rpl24 PE=1 SV=2	51	13	32	13	157	17.8	11.25	100.88	95.9	104.6	100.4	100.6	96.2	102.2
P40336	Vacuolar protein sorting-associated protein 26A OS=Mus musculus OX=10090 GN=Vps26a PE=1 SV=1	32	11	21	10	327	38.1	6.57	74.4	98.9	97.7	101.5	101.6	101.4	98.8
Q9D906	Ubiquitin-like modifier-activating enzyme ATG7 OS=Mus musculus OX=10090 GN=Atg7 PE=1 SV=1	22	14	27	14	698	77.5	6.4	88.08	97.3	99.2	98.8	102	102	100.7
Q06138	Calcium-binding protein 39 OS=Mus musculus OX=10090 GN=Cab39 PE=1 SV=2	50	18	30	16	341	39.8	6.89	87.36	98.7	100.5	99.9	101.7	101.1	98.1
Q8BH57	WD repeat-containing protein 48 OS=Mus musculus OX=10090 GN=Wdr48 PE=1 SV=1	27	14	28	14	676	76	7.17	76.05	100.3	100.5	100.7	99.3	101.4	97.8
Q9Z0U1	Tight junction protein ZO-2 OS=Mus musculus OX=10090 GN=Tjp2 PE=1 SV=2	15	17	31	17	1167	131.2	6.79	69.98	103.4	95.4	98.7	99.4	98.4	104.6
Q64524	Histone H2B type 2-E OS=Mus musculus OX=10090 GN=H2bc21 PE=1 SV=3	53	9	51	1	126	14	10.32	146.33	92.4	89.5	108.2	103.6	106.2	100.1
Q8CHT1	Ephexin-1 OS=Mus musculus OX=10090 GN=Ngef PE=1 SV=1	23	16	26	16	710	82.1	5.99	75.03	97.1	97.2	97.4	102.9	101.9	103.5
Q80ZF8	Adhesion G protein-coupled receptor B3 OS=Mus musculus OX=10090 GN=Adgrb3 PE=1 SV=2	9	14	25	14	1522	171.2	7.02	69.27	96.9	101	97.7	98.6	102.7	103
Q8BGH2	Sorting and assembly machinery component 50 homolog OS=Mus musculus OX=10090 GN=Samm50 PE=1 SV=1	32	16	43	16	469	51.8	6.8	128.42	99.7	101	99.7	100	101.8	97.9
Q9EQQ9	Protein O-GlcNAcase OS=Mus musculus OX=10090 GN=Oga PE=1 SV=2	22	17	37	17	916	103.1	4.92	102.95	96.1	98.3	103.9	96.9	101.8	103.1
P47941	Crk-like protein OS=Mus musculus OX=10090 GN=Crkl PE=1 SV=2	46	13	34	13	303	33.8	6.74	115.86	99.6	97.8	102.1	100.6	98.8	101.2
P70335	Rho-associated protein kinase 1 OS=Mus musculus OX=10090 GN=Rock1 PE=1 SV=1	13	18	22	13	1354	158.1	5.86	55.59	99.3	97	93.4	108.2	98.5	103.5
Q9QXG2	Rab proteins geranylgeranyltransferase component A 1 OS=Mus musculus OX=10090 GN=Chm PE=1 SV=1	21	15	27	15	665	73.9	4.68	77.04	96.5	100.4	98.5	100.2	99.4	105
Q9DCL9	Multifunctional protein ADE2 OS=Mus musculus OX=10090 GN=Paics PE=1 SV=4	37	17	32	17	425	47	7.23	96.09	101.7	99.3	99.8	100	99.8	99.5
Q68ED2	Metabotropic glutamate receptor 7 OS=Mus musculus OX=10090 GN=Grm7 PE=1 SV=1	19	15	22	14	915	102.2	7.88	64.63	98.7	102.3	104	98.4	98.5	98
P23242	Gap junction alpha-1 protein OS=Mus musculus OX=10090 GN=Gja1 PE=1 SV=2	25	9	19	9	382	43	8.76	76.27	103.9	98.7	94.4	95.8	108.9	98.3
Q8R3S6	Exocyst complex component 1 OS=Mus musculus OX=10090 GN=Exoc1 PE=1 SV=4	18	17	37	16	894	101.8	6.52	101.11	100.3	99.8	100.3	97.9	100.4	101.3
Q8K4Q0	Regulatory-associated protein of mTOR OS=Mus musculus OX=10090 GN=Rptor PE=1 SV=1	14	19	23	19	1335	149.4	6.87	61.86	96.9	96.2	100.8	102.1	103.4	100.6
P53811	Phosphatidylinositol transfer protein beta isoform OS=Mus musculus OX=10090 GN=Pitpnb PE=1 SV=2	42	14	25	11	271	31.5	6.95	77.88	100.4	100.1	104.5	96.8	98.3	99.9
Q8CIG8	Protein arginine N-methyltransferase 5 OS=Mus musculus OX=10090 GN=Prmt5 PE=1 SV=3	27	17	35	17	637	72.6	6.42	90.76	96.8	98.6	102.7	101.7	99.4	100.9
O88543	COP9 signalosome complex subunit 3 OS=Mus musculus OX=10090 GN=Cops3 PE=1 SV=3	29	11	38	11	423	47.8	6.65	131.61	98.8	98.2	101.6	100.7	101	99.7
Q9Z0H4	CUGBP Elav-like family member 2 OS=Mus musculus OX=10090 GN=Celf2 PE=1 SV=1	28	16	42	11	508	54.2	8.76	110.6	96.9	103.2	101.7	101.3	97.3	99.6
P97447	Four and a half LIM domains protein 1 OS=Mus musculus OX=10090 GN=Fhl1 PE=1 SV=3	44	11	32	11	280	31.9	8.37	117.64	99.9	96	102.8	95.2	103.7	102.4
Q99MR6	Serrate RNA effector molecule homolog OS=Mus musculus OX=10090 GN=Srrt PE=1 SV=1	24	20	45	20	875	100.4	5.97	117.97	98.5	101.1	103.7	99.5	97.6	99.7
Q8BH44	Coronin-2B OS=Mus musculus OX=10090 GN=Coro2b PE=1 SV=2	31	16	47	16	480	54.9	8.27	134.34	102.5	97.8	97.5	97.4	106.6	98.2
Q8BWQ6	VPS35 endosomal protein-sorting factor-like OS=Mus musculus OX=10090 GN=Vps35l PE=1 SV=2	17	15	25	15	963	109	7.31	73.79	97.4	99.5	102.1	101.8	99.2	99.9
P45591	Cofilin-2 OS=Mus musculus OX=10090 GN=Cfl2 PE=1 SV=1	69	13	59	10	166	18.7	7.88	160.72	102.4	100.4	99.1	100.7	96.7	100.8
Q8BJY1	26S proteasome non-ATPase regulatory subunit 5 OS=Mus musculus OX=10090 GN=Psmd5 PE=1 SV=4	37	14	20	14	504	55.9	5.21	81.39	99.6	102	99.9	99.5	100.6	98.4
Q61937	Nucleophosmin OS=Mus musculus OX=10090 GN=Npm1 PE=1 SV=1	44	13	25	13	292	32.5	4.77	69.9	98.7	103	100.1	101	99	98.3
Q9CYG7	Mitochondrial import receptor subunit TOM34 OS=Mus musculus OX=10090 GN=Tomm34 PE=1 SV=1	48	16	28	16	309	34.3	9.14	88.94	94.8	99.3	102	95.8	106.2	101.8
Q61655	ATP-dependent RNA helicase DDX19A OS=Mus musculus OX=10090 GN=Ddx19a PE=1 SV=2	30	15	28	15	478	53.9	6.67	78.98	99.9	99.9	101.5	100.4	97.9	100.4
Q99NF2	NMDA receptor synaptonuclear signaling and neuronal migration factor OS=Mus musculus OX=10090 GN=Nsmf PE=1 SV=1	33	15	27	15	532	60.3	8.98	87.57	97.3	100.4	102.3	99.9	97.8	102.3
P27671	Ras-specific guanine nucleotide-releasing factor 1 OS=Mus musculus OX=10090 GN=Rasgrf1 PE=1 SV=2	15	19	30	17	1262	144	7.17	80.87	91.4	95.9	94.6	105.8	107.2	105.2
Q60960	Importin subunit alpha-5 OS=Mus musculus OX=10090 GN=Kpna1 PE=1 SV=2	26	14	26	8	538	60.1	5.01	88.32	91.9	98.9	97.5	104.4	103.7	103.6
P55302	Alpha-2-macroglobulin receptor-associated protein OS=Mus musculus OX=10090 GN=Lrpap1 PE=1 SV=1	41	17	34	17	360	42.2	7.87	93.42	100.6	102.4	104.8	100.3	88.5	103.3
P06801	NADP-dependent malic enzyme OS=Mus musculus OX=10090 GN=Me1 PE=1 SV=2	28	15	34	15	572	63.9	7.44	91.9	93.7	96.7	110.2	95.9	103.7	99.7
A2AJI0	MAP7 domain-containing protein 1 OS=Mus musculus OX=10090 GN=Map7d1 PE=1 SV=1	24	17	37	17	846	93.2	10.15	85.61	101	97.8	102.4	100.2	98.6	100.1
Q69Z98	Serine/threonine-protein kinase BRSK2 OS=Mus musculus OX=10090 GN=Brsk2 PE=1 SV=2	24	19	25	10	735	81.7	8.79	73.99	96.6	98.4	99.2	100.8	101.2	103.8
B2RY56	RNA-binding protein 25 OS=Mus musculus OX=10090 GN=Rbm25 PE=1 SV=2	21	17	30	17	838	99.5	6.32	85.95	92.4	103.3	100.7	104	98.7	100.9
O08756	3-hydroxyacyl-CoA dehydrogenase type-2 OS=Mus musculus OX=10090 GN=Hsd17b10 PE=1 SV=4	36	8	39	8	261	27.4	8.41	140.23	97.8	98.2	102.5	100.6	101.9	99
Q8C754	Vacuolar protein sorting-associated protein 52 homolog OS=Mus musculus OX=10090 GN=Vps52 PE=1 SV=1	20	12	31	12	723	82	5.9	104.88	98.9	99.4	98.4	97.7	105.3	100.4
Q3THS6	S-adenosylmethionine synthase isoform type-2 OS=Mus musculus OX=10090 GN=Mat2a PE=1 SV=2	33	14	44	14	395	43.7	6.48	134.52	99.2	100.7	98.6	100.2	101	100.2
Q8BR92	Paralemmin-2 OS=Mus musculus OX=10090 GN=Palm2 PE=1 SV=1	41	15	31	13	376	42.1	5.15	102.19	98.1	101.1	100.7	98.9	99.8	101.3
Q9ES00	Ubiquitin conjugation factor E4 B OS=Mus musculus OX=10090 GN=Ube4b PE=1 SV=3	15	15	26	15	1173	133.2	6.07	82.28	97.2	99.6	103.2	100.8	97.7	101.4
Q9Z1F9	SUMO-activating enzyme subunit 2 OS=Mus musculus OX=10090 GN=Uba2 PE=1 SV=1	29	19	31	19	638	70.5	5.24	89.59	98.8	103.4	100.9	102.1	95.8	98.9
Q99PL6	UBX domain-containing protein 6 OS=Mus musculus OX=10090 GN=Ubxn6 PE=1 SV=1	34	15	23	14	442	49.8	8.54	74.13	103	97.5	98.1	99.2	102.4	99.7
Q8BH04	Phosphoenolpyruvate carboxykinase [GTP], mitochondrial OS=Mus musculus OX=10090 GN=Pck2 PE=1 SV=1	21	12	33	12	640	70.5	7.28	112.47	98.1	94.6	100.2	100.9	102	104.2
P29758	Ornithine aminotransferase, mitochondrial OS=Mus musculus OX=10090 GN=Oat PE=1 SV=1	28	11	24	11	439	48.3	6.62	97.68	101.8	98.8	98.8	100.6	99.6	100.3
Q922R8	Protein disulfide-isomerase A6 OS=Mus musculus OX=10090 GN=Pdia6 PE=1 SV=3	30	12	27	12	440	48.1	5.14	105.8	94.9	103.7	106.8	99	94.7	100.8
Q8VBZ3	Cleft lip and palate transmembrane protein 1 homolog OS=Mus musculus OX=10090 GN=Clptm1 PE=1 SV=1	19	10	18	10	664	75.2	6.3	69.47	97.1	102.6	101.1	105.7	94.5	99
P32020	Sterol carrier protein 2 OS=Mus musculus OX=10090 GN=Scp2 PE=1 SV=3	18	12	31	12	547	59.1	7.44	93.67	99.5	99.7	101.4	102.3	95.5	101.6
Q8BMA6	Signal recognition particle subunit SRP68 OS=Mus musculus OX=10090 GN=Srp68 PE=1 SV=2	22	14	32	14	625	70.5	8.57	97.21	94.4	100.9	104.2	100.6	98.6	101.2
Q8C7M3	E3 ubiquitin-protein ligase TRIM9 OS=Mus musculus OX=10090 GN=Trim9 PE=1 SV=2	23	16	27	16	817	90.8	7.24	69.16	93.1	96.7	95.9	103.7	101.2	109.3
Q8R5C5	Beta-centractin OS=Mus musculus OX=10090 GN=Actr1b PE=1 SV=1	28	12	50	5	376	42.3	6.4	143.56	98.3	100.3	100.1	101.8	99	100.5
Q8BW96	Calcium/calmodulin-dependent protein kinase type 1D OS=Mus musculus OX=10090 GN=Camk1d PE=1 SV=2	36	12	23	11	385	42.9	7.17	85.66	100	102.6	99.6	97.7	98.5	101.5
Q8VEH5	EPM2A-interacting protein 1 OS=Mus musculus OX=10090 GN=Epm2aip1 PE=1 SV=1	24	13	35	13	606	70.1	5.87	102.9	99	102.5	100.4	103	94.2	100.9
P36916	Guanine nucleotide-binding protein-like 1 OS=Mus musculus OX=10090 GN=Gnl1 PE=1 SV=4	26	14	26	14	607	68.7	5.68	79.92	100	99	98.8	103.2	97.9	101
Q9CZW4	Fatty acid CoA ligase Acsl3 OS=Mus musculus OX=10090 GN=Acsl3 PE=1 SV=2	22	14	36	12	720	80.4	8.54	94.98	99.9	100.6	97.9	101.1	100.2	100.3
Q8VHR5	Transcriptional repressor p66-beta OS=Mus musculus OX=10090 GN=Gatad2b PE=1 SV=1	30	16	25	16	594	65.4	9.7	71.48	91	100	99.4	102.7	99.3	107.5
Q91ZW3	SWI/SNF-related matrix-associated actin-dependent regulator of chromatin subfamily A member 5 OS=Mus musculus OX=10090 GN=Smarca5 PE=1 SV=1	19	20	25	20	1051	121.6	8.15	63.57	94.4	100.2	98.3	103.4	102.8	101
Q8BWT5	Disco-interacting protein 2 homolog A OS=Mus musculus OX=10090 GN=Dip2a PE=1 SV=3	14	18	22	18	1523	165.1	7.61	53.02	96.5	97	102.2	103	100.2	101.2
Q61207	Prosaposin OS=Mus musculus OX=10090 GN=Psap PE=1 SV=2	25	13	20	13	557	61.4	5.19	66.36	95.6	92.7	103.5	101.2	100.9	106.2
Q8VIM9	Immunity-related GTPase family Q protein OS=Mus musculus OX=10090 GN=Irgq PE=1 SV=1	23	13	36	13	583	59.3	4.83	106.19	98.9	100.9	100	101.7	97.5	100.9
O54833	Casein kinase II subunit alpha' OS=Mus musculus OX=10090 GN=Csnk2a2 PE=1 SV=1	37	12	30	12	350	41.2	8.56	116.26	99.8	97.1	98.1	100.5	103.6	101
P14869	60S acidic ribosomal protein P0 OS=Mus musculus OX=10090 GN=Rplp0 PE=1 SV=3	37	12	30	12	317	34.2	6.25	97.82	97.4	101.6	103.2	103	93.8	101
P55264	Adenosine kinase OS=Mus musculus OX=10090 GN=Adk PE=1 SV=2	36	14	38	14	361	40.1	6.21	124.11	100.6	100.5	99.6	99.6	99.7	100
B2RQC6	CAD protein OS=Mus musculus OX=10090 GN=Cad PE=1 SV=1	11	18	28	18	2225	243.1	6.43	79.11	96.3	99.1	99.6	103.1	97.2	104.7
O70435	Proteasome subunit alpha type-3 OS=Mus musculus OX=10090 GN=Psma3 PE=1 SV=3	51	16	37	16	255	28.4	5.44	107.79	98.7	101.6	103	99.8	96.6	100.3
P97411	Islet cell autoantigen 1 OS=Mus musculus OX=10090 GN=Ica1 PE=1 SV=3	28	14	26	12	478	54.3	5.8	78.17	100	98.7	98.4	98.2	104.7	100
Q8R001	Microtubule-associated protein RP/EB family member 2 OS=Mus musculus OX=10090 GN=Mapre2 PE=1 SV=1	38	11	45	10	326	36.9	5.38	177.35	98.7	97.1	98.9	101.9	101.4	102
Q5SSH7	Zinc finger ZZ-type and EF-hand domain-containing protein 1 OS=Mus musculus OX=10090 GN=Zzef1 PE=1 SV=2	7	20	22	20	2924	328.1	6.11	57.45	97.6	101.9	99	100.7	97.9	102.8
P47867	Secretogranin-3 OS=Mus musculus OX=10090 GN=Scg3 PE=1 SV=1	34	14	19	14	471	53.3	4.93	54.17	97.4	96	102.3	102	98.7	103.7
Q6PDS3	NAD(+) hydrolase SARM1 OS=Mus musculus OX=10090 GN=Sarm1 PE=1 SV=1	21	13	22	13	724	79.6	6.27	69.2	95	102.5	99.5	103	98.2	101.8
Q5DTY9	BTB/POZ domain-containing protein KCTD16 OS=Mus musculus OX=10090 GN=Kctd16 PE=1 SV=2	34	19	26	17	427	48.9	8.19	70	103.3	101.3	99.1	98.4	98.6	99.2
Q6GQS1	Calcium-binding mitochondrial carrier protein SCaMC-3 OS=Mus musculus OX=10090 GN=Slc25a23 PE=1 SV=1	37	17	27	15	467	52.5	7.59	81.82	100.6	99.6	98.6	102.6	100.4	98.3
P00493	Hypoxanthine-guanine phosphoribosyltransferase OS=Mus musculus OX=10090 GN=Hprt1 PE=1 SV=3	47	9	24	9	218	24.6	6.68	85.34	102.8	99.6	102.5	97.9	99.4	97.8
Q8CI32	BAG family molecular chaperone regulator 5 OS=Mus musculus OX=10090 GN=Bag5 PE=1 SV=1	26	11	28	11	447	50.9	6.05	85.73	97.4	104	99.2	98.9	100.6	100
Q9CZX8	40S ribosomal protein S19 OS=Mus musculus OX=10090 GN=Rps19 PE=1 SV=3	66	14	33	14	145	16.1	10.4	103.55	97.4	103.4	102.8	101.5	93.3	101.7
Q9Z2W0	Aspartyl aminopeptidase OS=Mus musculus OX=10090 GN=Dnpep PE=1 SV=2	24	12	34	12	473	52.2	7.25	100.9	100	97.9	101.7	101.4	98.1	100.8
P41216	Long-chain-fatty-acid--CoA ligase 1 OS=Mus musculus OX=10090 GN=Acsl1 PE=1 SV=2	23	15	44	13	699	77.9	7.15	133.45	96.3	100.1	100.3	102.1	100.7	100.5
Q9CXZ1	NADH dehydrogenase [ubiquinone] iron-sulfur protein 4, mitochondrial OS=Mus musculus OX=10090 GN=Ndufs4 PE=1 SV=3	48	11	21	11	175	19.8	9.99	73.15	103.5	100.1	98.6	100.3	99.3	98.2
Q9D832	DnaJ homolog subfamily B member 4 OS=Mus musculus OX=10090 GN=Dnajb4 PE=1 SV=1	31	11	30	9	337	37.8	8.59	100.56	99.1	98.9	103.9	102.7	96.7	98.6
P01942	Hemoglobin subunit alpha OS=Mus musculus OX=10090 GN=Hba PE=1 SV=2	51	8	89	8	142	15.1	8.22	270.85	102.1	100.6	105	102.8	85.8	103.6
P54728	UV excision repair protein RAD23 homolog B OS=Mus musculus OX=10090 GN=Rad23b PE=1 SV=2	24	12	38	10	416	43.5	4.83	118	100	101.2	100.4	98.5	99.2	100.6
Q60900	ELAV-like protein 3 OS=Mus musculus OX=10090 GN=Elavl3 PE=1 SV=1	32	13	29	8	367	39.5	9.28	98.06	97.3	101	102.5	102.9	96.8	99.4
P14231	Sodium/potassium-transporting ATPase subunit beta-2 OS=Mus musculus OX=10090 GN=Atp1b2 PE=1 SV=2	39	11	38	11	290	33.3	8.31	129.5	101.8	100.2	98.1	101	102	97
Q8K354	Carbonyl reductase [NADPH] 3 OS=Mus musculus OX=10090 GN=Cbr3 PE=1 SV=1	43	12	35	11	277	30.9	6.57	108.83	93.6	103.2	95.7	101.2	105.2	101.2
Q91W39	Nuclear receptor coactivator 5 OS=Mus musculus OX=10090 GN=Ncoa5 PE=1 SV=1	29	17	34	17	579	65.3	9.82	85.45	96	102.9	102.2	102.3	96.6	100
Q9QXB9	Developmentally-regulated GTP-binding protein 2 OS=Mus musculus OX=10090 GN=Drg2 PE=1 SV=1	42	14	25	13	364	40.7	8.88	70.59	98.8	101.1	101	98.9	96.6	103.6
Q80U23	Syntaphilin OS=Mus musculus OX=10090 GN=Snph PE=1 SV=3	34	14	25	13	495	53.7	5.9	83.23	101.3	99.3	99.3	98.4	102.9	98.9
Q61335	B-cell receptor-associated protein 31 OS=Mus musculus OX=10090 GN=Bcap31 PE=1 SV=4	35	12	26	12	245	27.9	8.7	71.38	102.4	99.4	99.4	98.6	99.5	100.7
Q69ZF3	Non-lysosomal glucosylceramidase OS=Mus musculus OX=10090 GN=Gba2 PE=1 SV=2	22	16	23	16	918	103.2	5.59	72.55	97.7	100.2	101.1	103.1	97.3	100.6
Q9D6Z1	Nucleolar protein 56 OS=Mus musculus OX=10090 GN=Nop56 PE=1 SV=2	26	13	28	13	580	64.4	9.14	92.31	93.8	102.9	98.7	102.8	103.9	97.8
Q8R464	Cell adhesion molecule 4 OS=Mus musculus OX=10090 GN=Cadm4 PE=1 SV=1	38	10	30	10	388	42.7	6.3	119.4	102.3	95.9	95.8	98.1	104.5	103.4
P32883	GTPase KRas OS=Mus musculus OX=10090 GN=Kras PE=1 SV=1	46	9	30	5	189	21.6	6.77	128.13	96.1	98.3	101	100.8	101.3	102.5
Q9R190	Metastasis-associated protein MTA2 OS=Mus musculus OX=10090 GN=Mta2 PE=1 SV=1	26	19	40	15	668	75	9.67	101.56	93.2	102.1	101.6	102.8	98.1	102.3
Q9CPW4	Actin-related protein 2/3 complex subunit 5 OS=Mus musculus OX=10090 GN=Arpc5 PE=1 SV=3	67	7	44	7	151	16.3	5.67	206.56	99.1	104.9	100.8	97.6	99.2	98.5
P63158	High mobility group protein B1 OS=Mus musculus OX=10090 GN=Hmgb1 PE=1 SV=2	43	11	34	10	215	24.9	5.74	100.06	100.8	101.4	99.5	101.9	98.7	97.7
Q62415	Apoptosis-stimulating of p53 protein 1 OS=Mus musculus OX=10090 GN=Ppp1r13b PE=1 SV=2	17	19	31	19	1087	119.1	6.68	74.76	98.3	101.4	100.4	99.9	101	99
O88741	Ganglioside-induced differentiation-associated protein 1 OS=Mus musculus OX=10090 GN=Gdap1 PE=1 SV=1	23	10	29	10	358	41.3	8.37	99.75	97	102.3	101	100.9	97.8	101.1
Q7TQK5	Coiled-coil domain-containing protein 93 OS=Mus musculus OX=10090 GN=Ccdc93 PE=1 SV=1	23	14	27	14	629	72.6	8.29	67.12	98.1	99.9	102.5	101.6	97.3	100.5
Q91XD7	Protein disulfide isomerase Creld1 OS=Mus musculus OX=10090 GN=Creld1 PE=1 SV=1	37	14	27	14	420	45.7	5.02	82.72	96	98.6	99.4	99.4	104.4	102.2
Q149F3	Eukaryotic peptide chain release factor GTP-binding subunit ERF3B OS=Mus musculus OX=10090 GN=Gspt2 PE=1 SV=1	24	17	31	5	632	69.1	5.2	77.62	95.1	98.6	103.3	105.5	94.1	103.5
Q9D1T0	Leucine-rich repeat and immunoglobulin-like domain-containing nogo receptor-interacting protein 1 OS=Mus musculus OX=10090 GN=Lingo1 PE=1 SV=1	23	14	21	12	614	69.1	8.31	69.57	101.4	101.4	100.1	98.3	98.7	100.2
Q80VP0	Tectonin beta-propeller repeat-containing protein 1 OS=Mus musculus OX=10090 GN=Tecpr1 PE=1 SV=1	14	15	35	15	1166	130.2	6.48	110.6	102.6	100.7	100.4	99.4	96	101
Q8R4N0	Citramalyl-CoA lyase, mitochondrial OS=Mus musculus OX=10090 GN=Clybl PE=1 SV=2	36	13	22	13	338	37.5	8.54	71.74	98.2	97.9	101.9	99.4	103.4	99.3
P63213	Guanine nucleotide-binding protein G(I)/G(S)/G(O) subunit gamma-2 OS=Mus musculus OX=10090 GN=Gng2 PE=1 SV=2	83	7	28	7	71	7.8	7.99	102.83	102.3	103.1	100.6	103.3	97	93.6
Q8BG67	Protein EFR3 homolog A OS=Mus musculus OX=10090 GN=Efr3a PE=1 SV=1	17	12	19	10	819	92.6	6.83	56.39	94.7	102.5	100.6	102.4	100.7	99.1
P01027	Complement C3 OS=Mus musculus OX=10090 GN=C3 PE=1 SV=3	11	19	23	19	1663	186.4	6.73	57.1	110.9	89	103.4	94.5	101.8	100.3
P46061	Ran GTPase-activating protein 1 OS=Mus musculus OX=10090 GN=Rangap1 PE=1 SV=2	25	15	36	15	589	63.5	4.68	104.75	96.8	96.4	100.6	102.6	101.3	102.3
Q8CBY8	Dynactin subunit 4 OS=Mus musculus OX=10090 GN=Dctn4 PE=1 SV=1	37	14	36	14	467	53	7.72	98.37	101.1	99.5	98.7	99.5	100.3	100.9
Q9Z1T6	1-phosphatidylinositol 3-phosphate 5-kinase OS=Mus musculus OX=10090 GN=Pikfyve PE=1 SV=3	9	16	26	16	2097	236.7	6.68	50.91	95.4	97.7	98.3	99.7	102.6	106.4
Q91WM1	Spermatid perinuclear RNA-binding protein OS=Mus musculus OX=10090 GN=Strbp PE=1 SV=1	27	17	23	14	672	73.7	8.72	63.75	96.2	100.6	101.8	105.5	96.5	99.4
Q6NZC7	SEC23-interacting protein OS=Mus musculus OX=10090 GN=Sec23ip PE=1 SV=2	14	16	22	16	998	110.7	5.94	60.16	97.4	98.4	101.5	100.8	102.1	99.8
Q9JKF1	Ras GTPase-activating-like protein IQGAP1 OS=Mus musculus OX=10090 GN=Iqgap1 PE=1 SV=2	10	16	27	13	1657	188.6	6.48	69.37	99.5	99.7	110.5	99	96.3	94.9
P60487	Chronophin OS=Mus musculus OX=10090 GN=Pdxp PE=1 SV=1	45	10	30	10	292	31.5	5.74	109.99	97.9	97	99.5	99.4	103.8	102.5
Q61772	Ephrin type-A receptor 7 OS=Mus musculus OX=10090 GN=Epha7 PE=1 SV=2	17	15	24	11	998	111.8	5.86	59.78	93.9	106.3	96.9	99.3	98.4	105.2
Q8C0E2	Vacuolar protein sorting-associated protein 26B OS=Mus musculus OX=10090 GN=Vps26b PE=1 SV=1	42	15	28	14	336	39.1	7.37	97.57	96.1	99.5	103.1	103.7	99.9	97.6
Q3UUG6	TBC1 domain family member 24 OS=Mus musculus OX=10090 GN=Tbc1d24 PE=1 SV=2	22	13	35	13	561	63.2	7.24	113.85	101	98.7	100.4	101.1	101.1	97.7
P97450	ATP synthase-coupling factor 6, mitochondrial OS=Mus musculus OX=10090 GN=Atp5pf PE=1 SV=1	57	8	57	8	108	12.5	9.36	189.11	100.7	98.5	99.9	100.3	99.5	101
Q8BZN6	Dedicator of cytokinesis protein 10 OS=Mus musculus OX=10090 GN=Dock10 PE=1 SV=3	8	19	33	18	2150	245.6	7.05	66.5	102.7	96.6	99.8	94	105.4	101.5
O89026	Roundabout homolog 1 OS=Mus musculus OX=10090 GN=Robo1 PE=1 SV=1	11	14	21	13	1612	176.3	6.18	64.37	89.8	102.7	100.9	99.1	98.5	108.9
Q7TPM6	Fibronectin type III and SPRY domain-containing protein 1 OS=Mus musculus OX=10090 GN=Fsd1 PE=1 SV=1	28	13	32	13	496	55.5	6.67	102.77	97.5	96.5	100.9	103.5	102.1	99.5
O35639	Annexin A3 OS=Mus musculus OX=10090 GN=Anxa3 PE=1 SV=4	42	14	22	14	323	36.4	5.76	71.42	97.9	94.9	102.9	100.4	102.2	101.7
Q14BI2	Metabotropic glutamate receptor 2 OS=Mus musculus OX=10090 GN=Grm2 PE=1 SV=2	16	16	27	13	872	95.8	8.06	76.76	103.5	97.3	98.6	106.2	97.9	96.6
O35226	26S proteasome non-ATPase regulatory subunit 4 OS=Mus musculus OX=10090 GN=Psmd4 PE=1 SV=1	31	11	37	11	376	40.7	4.79	139.72	99.1	100.9	101.5	100.6	97.9	99.9
Q8R554	OTU domain-containing protein 7A OS=Mus musculus OX=10090 GN=Otud7a PE=1 SV=1	22	17	22	11	926	100.7	8.22	61.35	105.4	101.9	101.4	95.1	97	99.2
Q9D5V6	Synapse-associated protein 1 OS=Mus musculus OX=10090 GN=Syap1 PE=1 SV=1	43	13	24	13	365	41.3	4.54	68.38	98.9	98.9	103.9	97.4	100.3	100.5
Q6PCN3	Tau-tubulin kinase 1 OS=Mus musculus OX=10090 GN=Ttbk1 PE=1 SV=3	15	17	30	15	1308	141.5	5.62	61.82	96.2	96.6	101.4	98.7	101	106.1
P97772	Metabotropic glutamate receptor 1 OS=Mus musculus OX=10090 GN=Grm1 PE=1 SV=2	16	19	33	16	1199	133.1	6.86	79.85	94.5	103.6	102.9	98	100.6	100.4
Q9JLJ2	4-trimethylaminobutyraldehyde dehydrogenase OS=Mus musculus OX=10090 GN=Aldh9a1 PE=1 SV=1	35	14	28	14	494	53.5	6.98	83.12	104.6	99.2	98.8	97.4	103.2	96.9
Q91YR1	Twinfilin-1 OS=Mus musculus OX=10090 GN=Twf1 PE=1 SV=2	39	13	20	11	350	40.1	6.67	69.52	102.3	103.7	99.9	96.5	99.5	98.2
P21447	ATP-dependent translocase ABCB1 OS=Mus musculus OX=10090 GN=Abcb1a PE=1 SV=3	13	17	24	16	1276	140.6	8.85	60.77	97	94.4	102.8	106.4	102.1	97.3
P31230	Aminoacyl tRNA synthase complex-interacting multifunctional protein 1 OS=Mus musculus OX=10090 GN=Aimp1 PE=1 SV=2	51	12	25	12	310	34	8.35	96.71	98.2	102.2	101.8	98.6	95.7	103.5
Q8VBX6	Multiple PDZ domain protein OS=Mus musculus OX=10090 GN=Mpdz PE=1 SV=2	9	15	20	15	2055	218.6	5.02	60.99	98.8	96.6	100.8	96.3	101.4	106
Q9ESE1	Lipopolysaccharide-responsive and beige-like anchor protein OS=Mus musculus OX=10090 GN=Lrba PE=1 SV=1	6	16	27	11	2856	316.9	5.69	64.59	98.3	97.5	101.2	98.8	100.3	103.9
Q99JI6	Ras-related protein Rap-1b OS=Mus musculus OX=10090 GN=Rap1b PE=1 SV=2	46	10	32	4	184	20.8	5.78	106.1	100.1	100.4	99.2	99.6	99.6	101.1
Q921Q7	Ras and Rab interactor 1 OS=Mus musculus OX=10090 GN=Rin1 PE=1 SV=1	18	14	20	14	763	83	8.72	58.64	97.6	95.5	102.5	95.6	103.8	105.1
P60904	DnaJ homolog subfamily C member 5 OS=Mus musculus OX=10090 GN=Dnajc5 PE=1 SV=1	21	9	30	9	198	22.1	5.07	94.78	107.3	100.2	98.2	93.7	105.4	95.2
Q9Z2W8	Glutamate receptor 4 OS=Mus musculus OX=10090 GN=Gria4 PE=1 SV=2	14	12	29	5	902	100.8	8.07	85.98	95.3	96.3	102.8	107.3	100.5	97.8
Q91ZP9	N-terminal EF-hand calcium-binding protein 2 OS=Mus musculus OX=10090 GN=Necab2 PE=1 SV=1	35	12	23	11	389	43.4	5.3	76.62	100.7	97.3	98.5	102.8	99	101.6
O55201	Transcription elongation factor SPT5 OS=Mus musculus OX=10090 GN=Supt5h PE=1 SV=1	16	13	22	13	1082	120.6	5.05	63.69	93.5	97.7	102.9	101.8	101	103.2
O88998	Noelin OS=Mus musculus OX=10090 GN=Olfm1 PE=1 SV=1	25	11	24	11	485	55.4	6.95	69.5	100.7	101.7	102.3	97.1	97.3	100.8
Q9CZN8	Glutamyl-tRNA(Gln) amidotransferase subunit A, mitochondrial OS=Mus musculus OX=10090 GN=Qrsl1 PE=1 SV=1	32	13	17	13	525	56.7	5.95	52.69	99.8	99.3	102.4	99.9	100.2	98.4
Q9QZQ8	Core histone macro-H2A.1 OS=Mus musculus OX=10090 GN=Macroh2a1 PE=1 SV=3	32	11	28	10	372	39.7	9.8	91.77	95.7	99.6	102.3	101.1	104.3	97
P99027	60S acidic ribosomal protein P2 OS=Mus musculus OX=10090 GN=Rplp2 PE=1 SV=3	57	7	17	7	115	11.6	4.54	88.06	93.7	101	105.1	99.9	95	105.4
Q91YJ2	Sorting nexin-4 OS=Mus musculus OX=10090 GN=Snx4 PE=1 SV=1	33	15	25	15	450	51.7	5.8	72.16	95.6	100.3	98.9	103.6	98.6	103
O54829	Regulator of G-protein signaling 7 OS=Mus musculus OX=10090 GN=Rgs7 PE=1 SV=2	25	12	37	8	469	54.8	8.13	121.63	100.8	98.1	96.9	100.7	104.1	99.3
O70251	Elongation factor 1-beta OS=Mus musculus OX=10090 GN=Eef1b PE=1 SV=5	56	12	31	11	225	24.7	4.69	106.02	101.1	101.5	103.6	101.1	93.8	98.9
Q62465	Synaptic vesicle membrane protein VAT-1 homolog OS=Mus musculus OX=10090 GN=Vat1 PE=1 SV=3	31	13	34	13	406	43.1	6.37	95.75	96.6	100	99.8	99	97.4	107.2
Q9WV18	Gamma-aminobutyric acid type B receptor subunit 1 OS=Mus musculus OX=10090 GN=Gabbr1 PE=1 SV=1	12	15	29	15	960	108.1	8.21	77.75	98.4	99.7	101	100.5	98.8	101.7
O55091	Protein IMPACT OS=Mus musculus OX=10090 GN=Impact PE=1 SV=2	36	10	36	10	318	36.3	5.05	142.07	98.1	95.9	99.8	99.1	106.2	100.9
Q61831	Mitogen-activated protein kinase 10 OS=Mus musculus OX=10090 GN=Mapk10 PE=1 SV=2	29	13	29	3	464	52.5	6.96	78.74	103.5	101.4	99.4	101	93.9	100.8
Q60967	Bifunctional 3'-phosphoadenosine 5'-phosphosulfate synthase 1 OS=Mus musculus OX=10090 GN=Papss1 PE=1 SV=1	21	11	19	10	624	70.7	6.77	65.23	98.6	99.1	103.5	98.3	96.6	103.9
P62835	Ras-related protein Rap-1A OS=Mus musculus OX=10090 GN=Rap1a PE=1 SV=1	42	10	32	4	184	21	6.67	102.61	104.7	97.9	97.6	96.7	100.7	102.3
Q9Z2U0	Proteasome subunit alpha type-7 OS=Mus musculus OX=10090 GN=Psma7 PE=1 SV=1	45	10	26	10	248	27.8	8.46	95.28	99.2	101.6	101.9	99.6	98	99.7
Q9D2N4	Dystrobrevin alpha OS=Mus musculus OX=10090 GN=Dtna PE=1 SV=2	25	14	26	10	746	84	6.76	83.73	98.8	99	98.8	100.5	98.5	104.4
Q8CC27	Voltage-dependent L-type calcium channel subunit beta-2 OS=Mus musculus OX=10090 GN=Cacnb2 PE=1 SV=1	21	13	27	10	655	73.1	8.47	78.91	100.9	100.1	99.4	97.7	101	100.8
P60764	Ras-related C3 botulinum toxin substrate 3 OS=Mus musculus OX=10090 GN=Rac3 PE=1 SV=1	39	9	43	3	192	21.4	8.15	136.75	96.5	102	102.7	103.4	91.5	103.8
O70172	Phosphatidylinositol 5-phosphate 4-kinase type-2 alpha OS=Mus musculus OX=10090 GN=Pip4k2a PE=1 SV=1	29	13	30	6	405	46.1	6.99	90.88	100.7	95.1	97.8	97.1	110.1	99.2
Q99JB2	Stomatin-like protein 2, mitochondrial OS=Mus musculus OX=10090 GN=Stoml2 PE=1 SV=1	31	10	19	10	353	38.4	8.87	69.29	98	97.3	104.7	101.5	98	100.5
Q8QZS1	3-hydroxyisobutyryl-CoA hydrolase, mitochondrial OS=Mus musculus OX=10090 GN=Hibch PE=1 SV=1	33	13	24	13	385	43	8.06	67.37	99.2	98.3	100.4	99.6	101.9	100.6
Q62407	Striated muscle-specific serine/threonine-protein kinase OS=Mus musculus OX=10090 GN=Speg PE=1 SV=2	8	23	31	23	3262	354.1	8.21	54.03	97.2	107.4	100	97.6	96.3	101.3
Q3UMY5	Echinoderm microtubule-associated protein-like 4 OS=Mus musculus OX=10090 GN=Eml4 PE=1 SV=1	15	14	19	13	988	110	6.54	65.39	93.9	101.2	100.7	103.4	95.8	105
Q62448	Eukaryotic translation initiation factor 4 gamma 2 OS=Mus musculus OX=10090 GN=Eif4g2 PE=1 SV=2	20	17	32	17	906	102	7.14	75.19	95.2	101.1	101.2	100.5	98.7	103.3
O08914	Fatty-acid amide hydrolase 1 OS=Mus musculus OX=10090 GN=Faah PE=1 SV=1	24	11	24	11	579	63.2	7.87	97.19	97.3	104	101.2	99.3	98.1	100
P63325	40S ribosomal protein S10 OS=Mus musculus OX=10090 GN=Rps10 PE=1 SV=1	55	12	49	12	165	18.9	10.15	119.25	97.2	102.6	102.7	100.2	93.7	103.5
Q9JHS4	ATP-dependent Clp protease ATP-binding subunit clpX-like, mitochondrial OS=Mus musculus OX=10090 GN=Clpx PE=1 SV=2	22	12	15	12	634	69.2	7.71	49.85	101	100.1	103.2	98.8	95.9	101
Q8C8N2	Protein SCAI OS=Mus musculus OX=10090 GN=Scai PE=1 SV=2	25	16	33	16	606	70.2	8.6	100.72	103.4	101.2	98.5	99.3	101	96.5
Q8K009	Mitochondrial 10-formyltetrahydrofolate dehydrogenase OS=Mus musculus OX=10090 GN=Aldh1l2 PE=1 SV=2	17	15	24	13	923	101.5	6.29	63.04	92	101.2	100.5	102.5	97.3	106.6
Q9R0N5	Synaptotagmin-5 OS=Mus musculus OX=10090 GN=Syt5 PE=1 SV=1	22	10	34	6	386	43.1	9.6	121.13	96.6	96.6	101.9	101.8	101.2	102
Q6Y7W8	GRB10-interacting GYF protein 2 OS=Mus musculus OX=10090 GN=Gigyf2 PE=1 SV=2	15	17	23	16	1291	149.1	5.57	59	97.3	102.6	99.8	106.1	92.1	102
Q9QYF9	Protein NDRG3 OS=Mus musculus OX=10090 GN=Ndrg3 PE=1 SV=1	30	8	25	8	375	41.5	5.25	96.75	96.1	103.4	101.8	100.4	96.7	101.7
Q8R146	Acylamino-acid-releasing enzyme OS=Mus musculus OX=10090 GN=Apeh PE=1 SV=3	18	13	21	13	732	81.5	5.59	63.77	100.1	101.7	98.1	101.6	96.3	102.2
O70305	Ataxin-2 OS=Mus musculus OX=10090 GN=Atxn2 PE=1 SV=1	13	16	26	14	1285	136.4	9.55	76.77	97.7	99.5	105.9	100	95.3	101.7
Q60803	TNF receptor-associated factor 3 OS=Mus musculus OX=10090 GN=Traf3 PE=1 SV=2	25	15	24	15	567	64.3	8.05	66.08	96.6	98.8	102.5	99.8	99.2	103.1
P55288	Cadherin-11 OS=Mus musculus OX=10090 GN=Cdh11 PE=1 SV=1	22	12	20	12	796	88.1	4.89	81.21	97.5	101.6	100.6	100.7	99.3	100.2
P14576	Signal recognition particle 54 kDa protein OS=Mus musculus OX=10090 GN=Srp54 PE=1 SV=2	31	15	25	15	504	55.7	8.75	78.09	93.5	101.9	102.1	100.3	100	102.1
Q9Z0V2	Potassium voltage-gated channel subfamily D member 2 OS=Mus musculus OX=10090 GN=Kcnd2 PE=1 SV=1	25	13	26	10	630	70.5	8.07	80.91	95.9	102	101.4	99.5	100.3	101
Q91WG5	5'-AMP-activated protein kinase subunit gamma-2 OS=Mus musculus OX=10090 GN=Prkag2 PE=1 SV=2	23	13	22	11	566	62.9	9.36	67.86	96.7	99	100.3	101.4	103.5	99.1
Q8VE33	Ganglioside-induced differentiation-associated protein 1-like 1 OS=Mus musculus OX=10090 GN=Gdap1l1 PE=1 SV=1	36	11	38	11	370	42.3	6.6	136.59	98.9	96.5	102.7	101.1	100.1	100.6
P60766	Cell division control protein 42 homolog OS=Mus musculus OX=10090 GN=Cdc42 PE=1 SV=2	41	7	40	6	191	21.2	6.55	152.21	100	98.7	101.3	99.7	97.7	102.7
Q9D855	Cytochrome b-c1 complex subunit 7 OS=Mus musculus OX=10090 GN=Uqcrb PE=1 SV=3	73	13	46	13	111	13.5	9.11	143.58	100.6	99.1	98.5	100.1	101.8	100
P61021	Ras-related protein Rab-5B OS=Mus musculus OX=10090 GN=Rab5b PE=1 SV=1	46	8	23	4	215	23.7	8.13	83.3	101.2	101.1	101.7	96.4	99.9	99.7
P62881	Guanine nucleotide-binding protein subunit beta-5 OS=Mus musculus OX=10090 GN=Gnb5 PE=1 SV=1	30	12	28	12	395	43.5	6.46	92.48	101.8	98	98.7	98.9	105.6	96.9
Q99LD4	COP9 signalosome complex subunit 1 OS=Mus musculus OX=10090 GN=Gps1 PE=1 SV=1	30	15	35	15	471	53.4	6.84	90.5	100.7	99.3	98.7	100.1	101.1	100.1
Q01768	Nucleoside diphosphate kinase B OS=Mus musculus OX=10090 GN=Nme2 PE=1 SV=1	74	11	45	6	152	17.4	7.5	142.87	99.7	99.4	100.3	98.9	103.1	98.6
Q6P4S6	Serine/threonine-protein kinase SIK3 OS=Mus musculus OX=10090 GN=Sik3 PE=1 SV=3	12	17	27	17	1311	145.7	6.92	76.61	96.9	103	98.9	97.3	102	101.9
Q3UKJ7	WD40 repeat-containing protein SMU1 OS=Mus musculus OX=10090 GN=Smu1 PE=2 SV=2	27	14	27	14	513	57.5	7.18	76.52	97.8	98.2	99.5	102.5	103	99.1
Q9WU79	Proline dehydrogenase 1, mitochondrial OS=Mus musculus OX=10090 GN=Prodh PE=1 SV=2	26	13	30	13	599	68	8.24	89.51	100.7	96.6	97.9	103.8	102.9	98.2
Q9JMH6	Thioredoxin reductase 1, cytoplasmic OS=Mus musculus OX=10090 GN=Txnrd1 PE=1 SV=3	22	13	20	12	613	67	7.44	71.05	94.7	104.4	104.7	99.3	97.2	99.8
Q80TB8	Synaptic vesicle membrane protein VAT-1 homolog-like OS=Mus musculus OX=10090 GN=Vat1l PE=1 SV=2	27	14	39	14	417	45.8	5.06	119.47	99.6	99.3	108.9	97.5	101.7	93
P97492	Regulator of G-protein signaling 14 OS=Mus musculus OX=10090 GN=Rgs14 PE=1 SV=2	28	13	22	13	547	59.8	7.43	72.44	101	103.3	96.9	95.8	103	100
Q9QZB7	Actin-related protein 10 OS=Mus musculus OX=10090 GN=Actr10 PE=1 SV=2	39	13	23	13	417	46.2	7.61	78.32	99.9	99.7	99.1	103.5	96.7	101.1
Q8BJH1	Zinc finger C2HC domain-containing protein 1A OS=Mus musculus OX=10090 GN=Zc2hc1a PE=1 SV=1	40	16	38	16	324	35.1	9.88	105.57	99.6	99.8	103.5	101	93.8	102.3
P63094	Guanine nucleotide-binding protein G(s) subunit alpha isoforms short OS=Mus musculus OX=10090 GN=Gnas PE=1 SV=1	35	14	28	10	394	45.6	5.96	87.37	97	97.1	100.5	103	104.2	98.2
P59016	Vacuolar protein sorting-associated protein 33B OS=Mus musculus OX=10090 GN=Vps33b PE=1 SV=1	24	15	17	15	617	70.5	6.86	54.22	95.6	99.8	105.2	99.9	99.6	99.8
P30999	Catenin delta-1 OS=Mus musculus OX=10090 GN=Ctnnd1 PE=1 SV=2	18	15	32	15	938	104.9	6.87	83.95	93.2	99.1	103.2	102.2	97.8	104.6
Q9QZC2	Plexin-C1 OS=Mus musculus OX=10090 GN=Plxnc1 PE=1 SV=1	11	15	18	14	1574	176.4	7.75	45.07	102.2	94.8	99.7	101	100.1	102.2
Q9ET01	Glycogen phosphorylase, liver form OS=Mus musculus OX=10090 GN=Pygl PE=1 SV=4	15	15	26	6	850	97.4	7.09	70.36	100.3	95.4	101.2	94.8	106.7	101.6
O09131	Glutathione S-transferase omega-1 OS=Mus musculus OX=10090 GN=Gsto1 PE=1 SV=2	41	16	29	16	240	27.5	7.36	77.39	108.3	96	95	95	109.5	96.2
Q99JP6	Homer protein homolog 3 OS=Mus musculus OX=10090 GN=Homer3 PE=1 SV=2	53	18	29	17	356	39.7	5.36	78.52	99.6	103.8	98.9	95.4	100.4	101.9
Q91VW5	Golgin subfamily A member 4 OS=Mus musculus OX=10090 GN=Golga4 PE=1 SV=2	8	17	19	17	2238	257.4	5.36	45.05	90.2	99.8	106.1	101.6	94.6	107.7
Q9QYA2	Mitochondrial import receptor subunit TOM40 homolog OS=Mus musculus OX=10090 GN=Tomm40 PE=1 SV=3	29	7	26	7	361	37.9	7.74	96.42	95.8	100.7	103.2	103	94.9	102.4
Q08509	Epidermal growth factor receptor kinase substrate 8 OS=Mus musculus OX=10090 GN=Eps8 PE=1 SV=2	22	14	22	14	821	91.7	7.65	63.35	99.5	98.4	99.4	97.2	101.5	104
Q9CT10	Ran-binding protein 3 OS=Mus musculus OX=10090 GN=Ranbp3 PE=1 SV=2	30	12	26	12	491	52.5	5.12	79.46	95.6	99.8	103.7	102.2	97	101.6
Q2M3X8	Phosphatase and actin regulator 1 OS=Mus musculus OX=10090 GN=Phactr1 PE=1 SV=1	24	13	31	12	580	66.2	6.96	99.36	97.6	98.5	99.4	101.8	100.3	102.4
Q9Z110	Delta-1-pyrroline-5-carboxylate synthase OS=Mus musculus OX=10090 GN=Aldh18a1 PE=1 SV=2	22	16	23	16	795	87.2	7.55	62.24	98	96.5	100.7	100.5	102.6	101.7
Q4VAA2	Protein CDV3 OS=Mus musculus OX=10090 GN=Cdv3 PE=1 SV=2	47	12	24	12	281	29.7	6.1	88.6	100.3	100.4	100	98.2	98.1	103.1
O35678	Monoglyceride lipase OS=Mus musculus OX=10090 GN=Mgll PE=1 SV=1	40	12	23	12	303	33.4	7.15	75.22	102.1	99.2	98	95.7	99.5	105.5
P24547	Inosine-5'-monophosphate dehydrogenase 2 OS=Mus musculus OX=10090 GN=Impdh2 PE=1 SV=2	31	14	21	13	514	55.8	7.28	77.61	96.1	98.1	99.4	100.9	100.6	104.8
Q9CPR4	60S ribosomal protein L17 OS=Mus musculus OX=10090 GN=Rpl17 PE=1 SV=3	45	10	31	10	184	21.4	10.18	110.07	96.6	102.9	102.4	101.2	96.3	100.6
P60670	Nuclear protein localization protein 4 homolog OS=Mus musculus OX=10090 GN=Nploc4 PE=1 SV=3	26	14	17	14	608	68	6.46	57.96	94.6	100.7	102.3	98.8	98.9	104.7
O08547	Vesicle-trafficking protein SEC22b OS=Mus musculus OX=10090 GN=Sec22b PE=1 SV=3	38	8	32	8	215	24.7	8.51	128.81	100.6	100.9	101.8	102.4	95.6	98.6
Q9CXW3	Calcyclin-binding protein OS=Mus musculus OX=10090 GN=Cacybp PE=1 SV=1	52	10	20	10	229	26.5	7.87	73.18	93.9	101	106	97.3	98.8	102.9
Q06890	Clusterin OS=Mus musculus OX=10090 GN=Clu PE=1 SV=1	27	11	20	11	448	51.6	5.67	68.82	99.8	99	100.8	96.9	103.7	99.8
P70698	CTP synthase 1 OS=Mus musculus OX=10090 GN=Ctps1 PE=1 SV=2	25	15	17	14	591	66.6	6.58	54.93	96.1	101.2	99.3	100.8	98.6	104.1
Q6WVG3	BTB/POZ domain-containing protein KCTD12 OS=Mus musculus OX=10090 GN=Kctd12 PE=1 SV=1	34	11	40	9	327	35.9	5.81	118.04	100	101.9	97.3	96.5	98.5	105.9
Q6NV83	U2 snRNP-associated SURP motif-containing protein OS=Mus musculus OX=10090 GN=U2surp PE=1 SV=3	17	16	24	16	1029	118.2	8.47	58.43	91.6	101.7	100.9	103.7	99.3	102.7
Q9R1V7	Disintegrin and metalloproteinase domain-containing protein 23 OS=Mus musculus OX=10090 GN=Adam23 PE=1 SV=1	22	14	26	14	829	91.5	7.68	67.01	104.7	98	98.5	98.3	100	100.6
Q8CCJ4	APC membrane recruitment protein 2 OS=Mus musculus OX=10090 GN=Amer2 PE=1 SV=2	29	16	37	16	672	69.9	6.64	89.39	97.9	100.3	101.2	100.9	99.4	100.2
Q8BH55	Threonine synthase-like 1 OS=Mus musculus OX=10090 GN=Thnsl1 PE=1 SV=1	20	14	30	13	747	83	7.2	97.47	100.8	97.2	101.2	100	100.1	100.7
Q64436	Potassium-transporting ATPase alpha chain 1 OS=Mus musculus OX=10090 GN=Atp4a PE=1 SV=3	6	9	94	1	1033	113.9	5.88	252.44	100.6	98.7	98	98.9	100.5	103.4
Q9JHR7	Insulin-degrading enzyme OS=Mus musculus OX=10090 GN=Ide PE=1 SV=1	16	17	28	17	1019	117.7	6.54	82.71	94.9	100.9	100.5	98.2	98.4	107.2
Q8K1A6	Coiled-coil and C2 domain-containing protein 1A OS=Mus musculus OX=10090 GN=Cc2d1a PE=1 SV=2	15	15	18	15	943	103.6	7.84	50.76	100.6	96.5	102	99	98.8	103.1
Q9QUM9	Proteasome subunit alpha type-6 OS=Mus musculus OX=10090 GN=Psma6 PE=1 SV=1	35	9	26	9	246	27.4	6.76	101.39	99.3	103.2	101	102.1	95.9	98.5
Q9CQJ8	NADH dehydrogenase [ubiquinone] 1 beta subcomplex subunit 9 OS=Mus musculus OX=10090 GN=Ndufb9 PE=1 SV=3	58	8	41	8	179	22	7.8	170.28	102.2	100.1	97.6	98.5	102.8	98.8
Q9CZ42	ATP-dependent (S)-NAD(P)H-hydrate dehydratase OS=Mus musculus OX=10090 GN=Naxd PE=1 SV=1	41	10	18	10	343	36.7	7.77	73.81	101.4	100.1	100.8	98.4	101.8	97.5
P25444	40S ribosomal protein S2 OS=Mus musculus OX=10090 GN=Rps2 PE=1 SV=3	47	14	35	14	293	31.2	10.24	111.6	95.4	103.9	104	103.6	93.3	99.8
Q791T5	Mitochondrial carrier homolog 1 OS=Mus musculus OX=10090 GN=Mtch1 PE=1 SV=1	40	13	31	13	389	41.5	9.32	90.24	95.6	101.7	101.4	104.1	95.6	101.5
Q99L04	Dehydrogenase/reductase SDR family member 1 OS=Mus musculus OX=10090 GN=Dhrs1 PE=1 SV=1	39	13	23	13	313	34	8.35	62.66	99.6	100.9	98.8	99.6	98.1	103.2
Q7TPM1	Protein PRRC2B OS=Mus musculus OX=10090 GN=Prrc2b PE=1 SV=1	12	15	17	13	1486	160.8	8.16	39.71	97	100	104.6	99.5	94.5	104.2
Q9WVE8	Protein kinase C and casein kinase substrate in neurons protein 2 OS=Mus musculus OX=10090 GN=Pacsin2 PE=1 SV=1	28	15	34	12	486	55.8	5.2	97.61	102.9	97.9	99.8	99.3	105.2	95
Q8VCI5	Peroxisomal biogenesis factor 19 OS=Mus musculus OX=10090 GN=Pex19 PE=1 SV=1	36	9	22	9	299	32.7	4.34	94.53	95.5	101	101.8	99.4	97.2	105.2
Q99KP6	Pre-mRNA-processing factor 19 OS=Mus musculus OX=10090 GN=Prpf19 PE=1 SV=1	20	10	30	10	504	55.2	6.61	103.48	98.3	101.3	101.9	104.3	94.1	100.2
Q9CXS4	Centromere protein V OS=Mus musculus OX=10090 GN=Cenpv PE=1 SV=2	54	10	37	10	252	27.5	9.79	164.84	98.3	100.9	98.5	103.2	98.9	100.1
Q8C052	Microtubule-associated protein 1S OS=Mus musculus OX=10090 GN=Map1s PE=1 SV=2	17	17	43	16	973	102.9	7.02	102.65	98.9	99	100.3	99.9	100.6	101.3
O70252	Heme oxygenase 2 OS=Mus musculus OX=10090 GN=Hmox2 PE=1 SV=1	33	10	26	10	315	35.7	5.87	86.23	99.5	98.2	98.9	100.1	102.3	100.9
O55137	Acyl-coenzyme A thioesterase 1 OS=Mus musculus OX=10090 GN=Acot1 PE=1 SV=1	29	13	30	2	419	46.1	6.58	88.56	95.7	98.6	106.4	95.2	99.9	104.3
O54931	A-kinase anchor protein 2 OS=Mus musculus OX=10090 GN=Akap2 PE=1 SV=3	17	12	19	12	893	98.5	5.21	63.39	96.1	98.6	100.9	101.3	103.2	99.8
Q6NS52	Diacylglycerol kinase beta OS=Mus musculus OX=10090 GN=Dgkb PE=1 SV=2	16	13	28	12	802	90.2	7.93	86.28	99.5	95.6	100.1	95.2	108.3	101.4
Q61151	Serine/threonine-protein phosphatase 2A 56 kDa regulatory subunit epsilon isoform OS=Mus musculus OX=10090 GN=Ppp2r5e PE=1 SV=3	20	13	37	10	467	54.7	6.95	113.85	100.7	99.9	99.1	100.9	99.7	99.7
P99026	Proteasome subunit beta type-4 OS=Mus musculus OX=10090 GN=Psmb4 PE=1 SV=1	43	8	21	8	264	29.1	5.64	73.58	100.3	100.5	99.6	99.8	99.6	100.1
P49615	Cyclin-dependent-like kinase 5 OS=Mus musculus OX=10090 GN=Cdk5 PE=1 SV=1	46	13	32	12	292	33.3	7.66	79.5	96.8	99.5	98.9	101.1	102.7	100.9
Q9DBC7	cAMP-dependent protein kinase type I-alpha regulatory subunit OS=Mus musculus OX=10090 GN=Prkar1a PE=1 SV=3	35	14	22	10	381	43.2	5.35	72.14	99.4	100.3	101.3	100.2	99	99.8
Q99KN9	Clathrin interactor 1 OS=Mus musculus OX=10090 GN=Clint1 PE=1 SV=2	19	14	22	14	631	68.5	6.25	75.76	99	98.9	101.2	100.7	98.9	101.3
Q8CCK0	Core histone macro-H2A.2 OS=Mus musculus OX=10090 GN=Macroh2a2 PE=1 SV=3	34	14	25	13	372	40.1	9.69	68.79	91.8	98.3	103.3	112.6	99.3	94.8
Q80TY0	Formin-binding protein 1 OS=Mus musculus OX=10090 GN=Fnbp1 PE=1 SV=2	22	14	28	14	616	71.3	5.67	73.83	103.2	99.2	98.6	97.2	101.2	100.6
Q05BC3	Echinoderm microtubule-associated protein-like 1 OS=Mus musculus OX=10090 GN=Eml1 PE=1 SV=1	17	14	21	13	814	89.6	7.02	60.54	100	95.4	102.5	97.1	99.8	105.2
Q99K28	ADP-ribosylation factor GTPase-activating protein 2 OS=Mus musculus OX=10090 GN=Arfgap2 PE=1 SV=1	30	17	26	16	520	56.6	8.18	62.29	97.9	100	100.8	99.7	97	104.5
Q8BJU0	Small glutamine-rich tetratricopeptide repeat-containing protein alpha OS=Mus musculus OX=10090 GN=Sgta PE=1 SV=2	30	10	29	10	315	34.3	5.06	82.88	97.5	101.1	101.5	98.8	102.1	99
Q9JM13	Rab5 GDP/GTP exchange factor OS=Mus musculus OX=10090 GN=Rabgef1 PE=1 SV=1	30	12	15	11	491	56.8	6.79	58.08	98.5	97.6	101.6	99.7	103.8	98.8
P35922	Synaptic functional regulator FMR1 OS=Mus musculus OX=10090 GN=Fmr1 PE=1 SV=1	24	14	36	12	614	68.9	7.62	108.48	96.6	103.3	102.7	101.3	95.6	100.5
P22315	Ferrochelatase, mitochondrial OS=Mus musculus OX=10090 GN=Fech PE=1 SV=2	42	15	27	15	420	47.1	8.91	88.32	99.7	97.2	100.4	98.8	101.8	102.2
P09671	Superoxide dismutase [Mn], mitochondrial OS=Mus musculus OX=10090 GN=Sod2 PE=1 SV=3	45	10	43	10	222	24.6	8.62	135.27	105.4	96.8	95.1	97.6	108.5	96.6
Q5QNQ6	Oxysterol-binding protein 2 OS=Mus musculus OX=10090 GN=Osbp2 PE=1 SV=1	21	16	22	15	908	101.3	7.14	52.05	96.6	100	99.5	98.3	104.4	101.2
O35381	Acidic leucine-rich nuclear phosphoprotein 32 family member A OS=Mus musculus OX=10090 GN=Anp32a PE=1 SV=1	32	12	36	8	247	28.5	4.07	98.94	99.9	102.8	98.3	103	98.4	97.6
Q8R366	Immunoglobulin superfamily member 8 OS=Mus musculus OX=10090 GN=Igsf8 PE=1 SV=2	18	10	27	10	611	65	7.99	94.82	108.3	90.6	95	94.9	111.1	100
Q60854	Serpin B6 OS=Mus musculus OX=10090 GN=Serpinb6 PE=1 SV=1	41	14	19	14	378	42.6	5.74	51.64	97.9	101.4	100.5	98.5	100.7	101
Q60605	Myosin light polypeptide 6 OS=Mus musculus OX=10090 GN=Myl6 PE=1 SV=3	56	10	37	8	151	16.9	4.65	129.89	101.2	100.8	99.4	99.4	98	101.1
O54734	Dolichyl-diphosphooligosaccharide--protein glycosyltransferase 48 kDa subunit OS=Mus musculus OX=10090 GN=Ddost PE=1 SV=2	28	10	27	10	441	49	5.83	89.99	95.7	103.3	105.4	101.6	92.9	101
D3YZP9	Coiled-coil domain-containing protein 6 OS=Mus musculus OX=10090 GN=Ccdc6 PE=1 SV=1	30	13	32	13	469	52.9	7.34	103.72	99.4	100.3	101.8	98.5	98.2	101.8
Q8BGT5	Alanine aminotransferase 2 OS=Mus musculus OX=10090 GN=Gpt2 PE=1 SV=1	33	14	20	13	522	57.9	8	64.56	96.7	98.9	103.6	100.1	97.5	103.2
Q66JS6	Eukaryotic translation initiation factor 3 subunit J-B OS=Mus musculus OX=10090 GN=Eif3j2 PE=1 SV=1	35	11	32	11	263	29.5	4.81	109.66	96.5	102.3	103.1	99.5	97.7	100.8
Q8K1R3	Polyribonucleotide nucleotidyltransferase 1, mitochondrial OS=Mus musculus OX=10090 GN=Pnpt1 PE=1 SV=1	22	17	21	17	783	85.6	8.03	56.73	98.8	98	99.9	103.1	100.8	99.4
Q9R1C6	Diacylglycerol kinase epsilon OS=Mus musculus OX=10090 GN=Dgke PE=1 SV=1	20	12	28	12	564	63.6	7.44	75.24	99.4	102.5	95.5	100.2	100	102.5
Q9DBE8	Alpha-1,3/1,6-mannosyltransferase ALG2 OS=Mus musculus OX=10090 GN=Alg2 PE=1 SV=2	34	14	24	14	415	47.4	7.97	72.62	100.3	99.5	100.6	102.9	96.5	100.2
Q9JLZ3	Methylglutaconyl-CoA hydratase, mitochondrial OS=Mus musculus OX=10090 GN=Auh PE=1 SV=1	38	13	42	13	314	33.4	9.51	142.79	102.3	100.1	101	95.5	103	98.2
Q3TIV5	Zinc finger CCCH domain-containing protein 15 OS=Mus musculus OX=10090 GN=Zc3h15 PE=1 SV=2	34	15	27	15	426	48.3	5.3	64.89	97.2	100.4	100.1	100.4	102.6	99.3
Q62376	U1 small nuclear ribonucleoprotein 70 kDa OS=Mus musculus OX=10090 GN=Snrnp70 PE=1 SV=2	29	16	29	16	448	52	9.94	80.92	97.8	103	101	100.8	96.1	101.2
Q8BHL3	TBC1 domain family member 10B OS=Mus musculus OX=10090 GN=Tbc1d10b PE=1 SV=2	20	15	27	15	798	87.2	8.9	62.85	98.9	98.9	101	99	100.4	101.7
Q8R3B1	1-phosphatidylinositol 4,5-bisphosphate phosphodiesterase delta-1 OS=Mus musculus OX=10090 GN=Plcd1 PE=1 SV=2	18	12	27	12	756	85.8	6.21	68.67	98.4	98.7	103	99.7	102.2	98
P46935	E3 ubiquitin-protein ligase NEDD4 OS=Mus musculus OX=10090 GN=Nedd4 PE=1 SV=3	20	17	27	15	887	102.6	5.26	69.28	94.1	99.2	98.2	102.7	100.4	105.4
Q07113	Cation-independent mannose-6-phosphate receptor OS=Mus musculus OX=10090 GN=Igf2r PE=1 SV=1	7	18	21	18	2483	273.6	5.71	43.17	95	102.9	105.4	100.2	93.1	103.3
Q9ESK9	RB1-inducible coiled-coil protein 1 OS=Mus musculus OX=10090 GN=Rb1cc1 PE=1 SV=3	11	17	22	17	1588	182.2	5.49	57.5	98.5	97.9	98.6	97.2	101.5	106.4
Q9DCN2	NADH-cytochrome b5 reductase 3 OS=Mus musculus OX=10090 GN=Cyb5r3 PE=1 SV=3	39	12	26	12	301	34.1	8.38	77.21	98	101.5	101.5	102.2	95.3	101.6
Q62421	Endophilin-A3 OS=Mus musculus OX=10090 GN=Sh3gl3 PE=1 SV=1	37	15	34	15	347	38.9	5.12	105.11	101.1	95	101.3	96.3	106.6	99.6
Q9WTR5	Cadherin-13 OS=Mus musculus OX=10090 GN=Cdh13 PE=1 SV=2	19	12	32	12	714	78.1	5.12	90.44	98.1	99.4	104.1	99.3	99.9	99.1
Q9QWW1	Homer protein homolog 2 OS=Mus musculus OX=10090 GN=Homer2 PE=1 SV=1	41	14	25	13	354	40.5	6.01	81.26	102.5	101.2	97.3	98.6	104.5	95.7
P98203	Armadillo repeat protein deleted in velo-cardio-facial syndrome homolog OS=Mus musculus OX=10090 GN=Arvcf PE=1 SV=2	21	19	30	18	962	105	6.64	70.11	94	99.1	102.2	105	95.1	104.6
Q91Z31	Polypyrimidine tract-binding protein 2 OS=Mus musculus OX=10090 GN=Ptbp2 PE=1 SV=2	26	13	24	11	531	57.5	8.66	83.2	97.7	102.7	100.2	102.8	95.5	101.1
P49722	Proteasome subunit alpha type-2 OS=Mus musculus OX=10090 GN=Psma2 PE=1 SV=3	58	10	23	10	234	25.9	7.43	85.7	97.8	98.3	100.4	99.9	99.7	103.8
O35465	Peptidyl-prolyl cis-trans isomerase FKBP8 OS=Mus musculus OX=10090 GN=Fkbp8 PE=1 SV=2	28	11	23	11	402	43.5	5.16	62.88	96.7	101.1	102	101	96.8	102.3
Q8C078	Calcium/calmodulin-dependent protein kinase kinase 2 OS=Mus musculus OX=10090 GN=Camkk2 PE=1 SV=2	25	13	27	13	588	64.6	5.9	81.65	97.6	99.5	101.6	99	99.8	102.5
Q78ZA7	Nucleosome assembly protein 1-like 4 OS=Mus musculus OX=10090 GN=Nap1l4 PE=1 SV=1	29	10	34	9	375	42.7	4.67	106.92	99.4	99.6	100.8	100.6	96.3	103.3
O88704	Potassium/sodium hyperpolarization-activated cyclic nucleotide-gated channel 1 OS=Mus musculus OX=10090 GN=Hcn1 PE=1 SV=1	14	13	26	11	910	102.4	8.37	86.68	100	96	98.8	101.1	104.9	99.2
Q91Y86	Mitogen-activated protein kinase 8 OS=Mus musculus OX=10090 GN=Mapk8 PE=1 SV=1	35	14	25	4	384	44.2	7.69	68.88	100.9	102.6	101.2	101.1	94.5	99.7
Q0P5W1	Vacuolar protein sorting-associated protein 8 homolog OS=Mus musculus OX=10090 GN=Vps8 PE=1 SV=1	12	14	23	14	1427	161	5.58	64.01	97.3	98.7	99.8	100.2	101	103
Q6NXK7	Inactive dipeptidyl peptidase 10 OS=Mus musculus OX=10090 GN=Dpp10 PE=1 SV=1	19	17	42	15	797	90.8	6.48	99.24	101.6	93.8	99.8	102.9	107.4	94.6
Q9ERI6	Retinol dehydrogenase 14 OS=Mus musculus OX=10090 GN=Rdh14 PE=1 SV=1	48	11	26	11	334	36.3	8.18	94.33	101.1	102.4	100.2	99.9	99.7	96.8
Q6PHZ8	Kv channel-interacting protein 4 OS=Mus musculus OX=10090 GN=Kcnip4 PE=1 SV=1	62	13	22	13	250	28.7	5.21	69.97	101	100.5	95.7	102.5	101.2	99.3
Q8BNY6	Neuronal calcium sensor 1 OS=Mus musculus OX=10090 GN=Ncs1 PE=1 SV=3	52	10	29	10	190	21.9	4.83	104.33	102.3	99.8	102.9	97.7	97.9	99.4
Q6ZPU9	KIF-binding protein OS=Mus musculus OX=10090 GN=Kifbp PE=1 SV=2	28	14	26	14	617	71	5.48	97.88	94.6	96.1	97.3	104.1	102.5	105.4
P47963	60S ribosomal protein L13 OS=Mus musculus OX=10090 GN=Rpl13 PE=1 SV=3	37	9	49	9	211	24.3	11.55	145.34	97.1	104.6	103.2	101.1	93.5	100.5
Q505F5	Leucine-rich repeat-containing protein 47 OS=Mus musculus OX=10090 GN=Lrrc47 PE=1 SV=1	24	15	21	15	581	63.6	8.1	60.84	102.8	99.6	98.6	98.1	100.1	100.9
P29387	Guanine nucleotide-binding protein subunit beta-4 OS=Mus musculus OX=10090 GN=Gnb4 PE=1 SV=4	31	11	35	6	340	37.4	6.16	113.57	95.5	104.4	93	99.9	99.9	107.2
Q922E4	Ethanolamine-phosphate cytidylyltransferase OS=Mus musculus OX=10090 GN=Pcyt2 PE=1 SV=1	29	14	35	14	404	45.2	6.58	100.81	102.5	99.6	98.4	100.6	99.1	99.7
Q8BVI4	Dihydropteridine reductase OS=Mus musculus OX=10090 GN=Qdpr PE=1 SV=2	44	8	23	8	241	25.6	7.81	81.11	111.2	93.7	94.5	94	109	97.5
Q9DBG6	Dolichyl-diphosphooligosaccharide--protein glycosyltransferase subunit 2 OS=Mus musculus OX=10090 GN=Rpn2 PE=1 SV=1	17	8	22	8	631	69	5.81	79.22	99.4	102.9	103.3	98.4	94.9	101.2
Q8VCX5	Calcium uptake protein 1, mitochondrial OS=Mus musculus OX=10090 GN=Micu1 PE=1 SV=1	28	16	29	16	477	54.3	8.59	78.14	98.1	99.6	101.7	98.5	102.5	99.7
P70195	Proteasome subunit beta type-7 OS=Mus musculus OX=10090 GN=Psmb7 PE=1 SV=1	27	8	35	8	277	29.9	7.99	93.4	98	101.4	101.8	98.5	98.7	101.6
O89084	cAMP-specific 3',5'-cyclic phosphodiesterase 4A OS=Mus musculus OX=10090 GN=Pde4a PE=1 SV=2	19	13	19	10	844	93.5	5.26	58.91	97.5	98.8	98.8	100.9	104	100.1
Q8BPQ7	Small G protein signaling modulator 1 OS=Mus musculus OX=10090 GN=Sgsm1 PE=1 SV=2	16	12	18	11	1093	123.1	5.66	54.58	94.2	99.7	100.3	102.3	98.6	104.9
Q3UMR5	Calcium uniporter protein, mitochondrial OS=Mus musculus OX=10090 GN=Mcu PE=1 SV=2	31	11	40	11	350	39.7	8.56	145.61	96.3	98.7	99.4	100.7	104.8	100.2
P62746	Rho-related GTP-binding protein RhoB OS=Mus musculus OX=10090 GN=Rhob PE=1 SV=1	38	8	40	7	196	22.1	5.24	145.54	101.4	100.4	96.9	96.1	101.9	103.2
Q8BG95	Protein phosphatase 1 regulatory subunit 12B OS=Mus musculus OX=10090 GN=Ppp1r12b PE=1 SV=2	16	12	21	11	976	109	5.74	44.72	96.6	94.8	103.8	101.1	101	102.7
Q6ZQ29	Serine/threonine-protein kinase TAO2 OS=Mus musculus OX=10090 GN=Taok2 PE=1 SV=3	13	15	19	13	1240	139.2	7.06	60.01	93.4	100.1	99.2	104.3	99.9	103.1
P21550	Beta-enolase OS=Mus musculus OX=10090 GN=Eno3 PE=1 SV=3	23	9	56	1	434	47	7.18	218.31	102.2	103.3	101.4	97.3	92	103.9
O89029	Matrilin-4 OS=Mus musculus OX=10090 GN=Matn4 PE=1 SV=1	22	13	23	13	624	68.9	5.76	73.23	98.8	101.1	103.5	98.3	96.6	101.7
Q3UMT1	Protein phosphatase 1 regulatory subunit 12C OS=Mus musculus OX=10090 GN=Ppp1r12c PE=1 SV=1	21	13	28	13	782	84.6	6	64.22	99.5	96.4	100.2	97.7	104.8	101.4
Q61838	Pregnancy zone protein OS=Mus musculus OX=10090 GN=Pzp PE=1 SV=3	12	16	25	16	1495	165.7	6.68	63.18	102.2	98.3	99.7	97.5	98.5	103.7
Q925E7	Serine/threonine-protein phosphatase 2A 55 kDa regulatory subunit B delta isoform OS=Mus musculus OX=10090 GN=Ppp2r2d PE=1 SV=1	28	12	27	4	453	51.9	6.49	80.64	100.4	99.5	100.1	97.1	101.9	101.2
Q99K01	Pyridoxal-dependent decarboxylase domain-containing protein 1 OS=Mus musculus OX=10090 GN=Pdxdc1 PE=1 SV=2	18	13	17	13	787	87.3	5.48	55.34	93.7	97.1	102.6	100.1	103.3	103.3
Q5U458	DnaJ homolog subfamily C member 11 OS=Mus musculus OX=10090 GN=Dnajc11 PE=1 SV=2	23	13	30	13	559	63.2	8.32	95.59	99.6	101	99.2	100.5	100.7	99
Q8BYM5	Neuroligin-3 OS=Mus musculus OX=10090 GN=Nlgn3 PE=1 SV=2	15	11	24	8	825	91.1	5.8	82.7	99.5	102.2	102.5	99.7	98	98.2
Q4JIM5	Tyrosine-protein kinase ABL2 OS=Mus musculus OX=10090 GN=Abl2 PE=1 SV=1	13	12	20	12	1182	128.1	7.84	62.82	96.9	99.6	98.7	103.2	101.1	100.6
O70591	Prefoldin subunit 2 OS=Mus musculus OX=10090 GN=Pfdn2 PE=1 SV=2	61	10	26	10	154	16.5	6.58	61.97	98.5	99.7	101.6	101.1	98.1	101
Q9Z2U1	Proteasome subunit alpha type-5 OS=Mus musculus OX=10090 GN=Psma5 PE=1 SV=1	39	7	25	7	241	26.4	4.79	113.93	96.6	99.3	101.3	103.2	99.8	99.8
O55022	Membrane-associated progesterone receptor component 1 OS=Mus musculus OX=10090 GN=Pgrmc1 PE=1 SV=4	55	11	25	9	195	21.7	4.7	79.95	99	98.8	101.4	102.1	99.3	99.4
P35979	60S ribosomal protein L12 OS=Mus musculus OX=10090 GN=Rpl12 PE=1 SV=2	69	9	38	9	165	17.8	9.42	129.46	98.6	104.4	102.9	99.4	94.7	100
Q8R0S4	Voltage-dependent L-type calcium channel subunit beta-4 OS=Mus musculus OX=10090 GN=Cacnb4 PE=1 SV=2	24	11	27	6	519	57.9	9.28	84.57	100.7	98	96	101.2	101.5	102.6
P20917	Myelin-associated glycoprotein OS=Mus musculus OX=10090 GN=Mag PE=1 SV=3	21	12	31	12	627	69.3	5.1	79.84	116.9	87.5	90.4	85.7	109.4	110.1
B0F2B4	Neuroligin 4-like OS=Mus musculus OX=10090 GN=Nlgn4l PE=1 SV=1	16	12	23	10	945	97.3	6.32	61.93	98.5	102.2	99.9	97.5	102.5	99.3
Q9D0M5	Dynein light chain 2, cytoplasmic OS=Mus musculus OX=10090 GN=Dynll2 PE=1 SV=1	52	5	114	3	89	10.3	7.37	396.64	104	98.5	97.7	100.2	101.8	97.8
Q9WTU3	Sodium channel protein type 8 subunit alpha OS=Mus musculus OX=10090 GN=Scn8a PE=1 SV=1	6	12	22	10	1978	225	6.25	76.45	97.4	101.4	99.1	97.1	101.8	103.2
Q91VM5	RNA binding motif protein, X-linked-like-1 OS=Mus musculus OX=10090 GN=Rbmxl1 PE=2 SV=1	39	19	71	5	388	42.1	9.99	150.69	99	102.1	102.6	102.2	93.1	100.9
Q9D7N9	Adipocyte plasma membrane-associated protein OS=Mus musculus OX=10090 GN=Apmap PE=1 SV=1	27	13	29	13	415	46.4	6.32	92.68	102.2	100.8	102	98.9	94.4	101.7
Q8QZT2	Centriole, cilia and spindle-associated protein OS=Mus musculus OX=10090 GN=Ccsap PE=1 SV=1	42	10	22	10	252	28.4	9.22	69.37	99.3	100.1	99	99	105.3	97.2
Q63912	Oligodendrocyte-myelin glycoprotein OS=Mus musculus OX=10090 GN=Omg PE=1 SV=1	16	9	25	9	440	49.3	8.41	85.3	107.5	97	96.2	98	104.6	96.7
Q9DB41	Mitochondrial glutamate carrier 2 OS=Mus musculus OX=10090 GN=Slc25a18 PE=1 SV=4	32	11	37	8	320	34.1	9.19	122.77	97.7	97.7	102.3	103.1	105.3	94
Q8BK67	Protein RCC2 OS=Mus musculus OX=10090 GN=Rcc2 PE=1 SV=1	24	16	20	16	520	55.9	8.72	61.3	95.2	102.7	97.3	100.3	100.2	104.2
Q3TY60	Protein FAM131B OS=Mus musculus OX=10090 GN=Fam131b PE=1 SV=1	37	11	14	11	332	35.9	4.45	47.96	101	96.5	97.8	100.4	103.7	100.4
Q5FWK3	Rho GTPase-activating protein 1 OS=Mus musculus OX=10090 GN=Arhgap1 PE=1 SV=1	31	14	30	14	439	50.4	6.44	89.71	103.9	96.3	102.8	96.7	104.7	95.5
Q3UVL4	Vacuolar protein sorting-associated protein 51 homolog OS=Mus musculus OX=10090 GN=Vps51 PE=1 SV=2	21	16	21	16	782	86.1	6.24	64.53	95.8	100.2	96.2	100	108.5	99.3
P14131	40S ribosomal protein S16 OS=Mus musculus OX=10090 GN=Rps16 PE=1 SV=4	71	13	33	13	146	16.4	10.21	87.25	95.6	102.5	103.6	103.3	93.5	101.4
P49442	Inositol polyphosphate 1-phosphatase OS=Mus musculus OX=10090 GN=Inpp1 PE=1 SV=2	30	10	25	10	396	43.3	5.01	87.19	99.5	97.5	101.8	100.3	101	100
P97379	Ras GTPase-activating protein-binding protein 2 OS=Mus musculus OX=10090 GN=G3bp2 PE=1 SV=2	28	12	24	11	482	54.1	5.62	68.71	96.6	101.4	103.2	99.8	98.4	100.6
Q9CQE8	RNA transcription, translation and transport factor protein OS=Mus musculus OX=10090 GN=RTRAF PE=1 SV=1	43	12	31	12	244	28.1	6.89	85.49	98.3	99.2	100.9	100	101.7	99.9
Q9WUD1	E3 ubiquitin-protein ligase CHIP OS=Mus musculus OX=10090 GN=Stub1 PE=1 SV=1	40	13	23	13	304	34.9	6.01	67.84	95.6	99.8	100.3	101.7	97.2	105.3
P50571	Gamma-aminobutyric acid receptor subunit beta-1 OS=Mus musculus OX=10090 GN=Gabrb1 PE=1 SV=1	25	11	15	8	474	54.1	8.78	45.41	96.9	100.2	102.4	101.5	100.3	98.6
O89112	Glutathione S-transferase LANCL1 OS=Mus musculus OX=10090 GN=Lancl1 PE=1 SV=1	33	13	28	13	399	45.3	7.77	86.62	99	99.2	97.9	99.1	105.2	99.6
Q68FD9	UPF0606 protein KIAA1549 OS=Mus musculus OX=10090 GN=Kiaa1549 PE=1 SV=3	8	14	19	14	1940	209.1	6.1	60.98	99.2	96.8	103.5	95.9	101.3	103.4
P31650	Sodium- and chloride-dependent GABA transporter 3 OS=Mus musculus OX=10090 GN=Slc6a11 PE=1 SV=2	12	9	24	7	627	69.9	6.98	84.39	100.2	95.3	103.4	105	99.8	96.3
Q9CYH2	Peroxiredoxin-like 2A OS=Mus musculus OX=10090 GN=Prxl2a PE=1 SV=2	34	10	19	10	218	24.4	9.17	62.12	102.1	99.1	103.3	98.8	97.8	98.9
Q99PG2	Opioid growth factor receptor OS=Mus musculus OX=10090 GN=Ogfr PE=1 SV=1	33	12	28	12	633	70.6	4.77	84.66	94.1	102.1	103.6	102	93.2	104.9
Q9CPP6	NADH dehydrogenase [ubiquinone] 1 alpha subcomplex subunit 5 OS=Mus musculus OX=10090 GN=Ndufa5 PE=1 SV=3	71	10	31	10	116	13.4	8.1	116	101.6	99.5	98.6	100	101.1	99.2
Q9JL04	Formin-2 OS=Mus musculus OX=10090 GN=Fmn2 PE=1 SV=2	11	14	23	14	1578	167.3	5.48	68.94	99.9	99.4	99.4	100.5	100.6	100.3
P16332	Methylmalonyl-CoA mutase, mitochondrial OS=Mus musculus OX=10090 GN=Mmut PE=1 SV=2	19	11	18	11	748	82.8	6.89	50.43	104	99.2	101.3	100.4	96.3	98.8
P26048	Gamma-aminobutyric acid receptor subunit alpha-2 OS=Mus musculus OX=10090 GN=Gabra2 PE=1 SV=1	28	14	24	6	451	51.1	9.06	66.72	95.8	97.1	101	96.7	101.1	108.4
Q80TL7	Protein MON2 homolog OS=Mus musculus OX=10090 GN=Mon2 PE=1 SV=2	9	16	21	16	1715	189	6.13	54.48	94.9	100.9	100	100.6	101.6	102
Q9Z1N9	Protein unc-13 homolog B OS=Mus musculus OX=10090 GN=Unc13b PE=1 SV=2	8	14	26	1	1602	181.7	5.95	68.33	93.9	88.3	111	110.1	108.5	88.2
Q922U2	Keratin, type II cytoskeletal 5 OS=Mus musculus OX=10090 GN=Krt5 PE=1 SV=1	15	13	26	5	580	61.7	7.75	81.51	104.7	92.7	96.6	144.3	65.7	96
Q9QYR9	Acyl-coenzyme A thioesterase 2, mitochondrial OS=Mus musculus OX=10090 GN=Acot2 PE=1 SV=2	28	13	30	2	453	49.6	7.36	90.48	100.2	99.2	100.4	96.6	100.2	103.4
P63024	Vesicle-associated membrane protein 3 OS=Mus musculus OX=10090 GN=Vamp3 PE=1 SV=1	50	7	32	1	103	11.5	8.5	132.45	105.1	101.3	84	109.1	85.4	115.1
Q91YE6	Importin-9 OS=Mus musculus OX=10090 GN=Ipo9 PE=1 SV=3	14	15	23	15	1041	116	4.81	67.47	96.7	100.7	101.9	102.6	96	102.1
Q8CG76	Aflatoxin B1 aldehyde reductase member 2 OS=Mus musculus OX=10090 GN=Akr7a2 PE=1 SV=3	32	11	25	11	367	40.6	8.12	77.85	99.6	99.1	99.8	98.3	104	99.2
Q61885	Myelin-oligodendrocyte glycoprotein OS=Mus musculus OX=10090 GN=Mog PE=1 SV=1	40	10	38	10	246	28.3	7.96	122.02	126.3	82.2	87.9	84.5	115.4	103.6
Q9EPL2	Calsyntenin-1 OS=Mus musculus OX=10090 GN=Clstn1 PE=1 SV=1	14	14	31	14	979	108.8	4.92	89.09	94.8	97.1	98.3	103.6	102	104.2
P58389	Serine/threonine-protein phosphatase 2A activator OS=Mus musculus OX=10090 GN=Ptpa PE=1 SV=1	43	13	34	13	323	36.7	6.39	106.48	102.9	98.7	97.2	100.4	101	99.9
Q8CHT0	Delta-1-pyrroline-5-carboxylate dehydrogenase, mitochondrial OS=Mus musculus OX=10090 GN=Aldh4a1 PE=1 SV=3	25	14	32	14	562	61.8	8.24	108.91	99.9	98.6	101.1	99.3	100.9	100.2
Q99L13	3-hydroxyisobutyrate dehydrogenase, mitochondrial OS=Mus musculus OX=10090 GN=Hibadh PE=1 SV=1	27	7	25	7	335	35.4	8.13	87.85	98.3	98.5	103.1	98.4	100.5	101.2
O88696	ATP-dependent Clp protease proteolytic subunit, mitochondrial OS=Mus musculus OX=10090 GN=Clpp PE=1 SV=1	33	9	25	9	272	29.8	7.47	97.66	99.4	100.2	99.7	100	99.9	100.8
Q6VNS1	NT-3 growth factor receptor OS=Mus musculus OX=10090 GN=Ntrk3 PE=1 SV=1	17	14	22	7	825	92.7	6.67	64.45	97.4	104	100.3	100.9	97.4	100
P63054	Calmodulin regulator protein PCP4 OS=Mus musculus OX=10090 GN=Pcp4 PE=3 SV=2	61	7	50	7	62	6.8	6.71	119.87	101.7	101.3	97	104.5	96.3	99.3
P70372	ELAV-like protein 1 OS=Mus musculus OX=10090 GN=Elavl1 PE=1 SV=2	40	11	28	11	326	36.1	9.04	107.32	99.8	101.3	101	100.8	97.6	99.5
Q9DCJ5	NADH dehydrogenase [ubiquinone] 1 alpha subcomplex subunit 8 OS=Mus musculus OX=10090 GN=Ndufa8 PE=1 SV=3	49	9	29	9	172	20	8.46	98.81	103.9	98.5	97.6	99	99.1	102
P60122	RuvB-like 1 OS=Mus musculus OX=10090 GN=Ruvbl1 PE=1 SV=1	24	9	17	9	456	50.2	6.42	67.89	99.8	98.3	100.2	101	99.6	101.1
P12787	Cytochrome c oxidase subunit 5A, mitochondrial OS=Mus musculus OX=10090 GN=Cox5a PE=1 SV=2	44	8	40	8	146	16.1	6.54	104.69	99.2	100.7	96	101.7	100.2	102.1
Q8CH18	Cell division cycle and apoptosis regulator protein 1 OS=Mus musculus OX=10090 GN=Ccar1 PE=1 SV=1	13	16	28	15	1146	132	5.76	55.62	99.7	100.2	101	97.3	99.6	102.2
Q9Z1T1	AP-3 complex subunit beta-1 OS=Mus musculus OX=10090 GN=Ap3b1 PE=1 SV=2	13	17	27	10	1105	122.7	5.66	58.5	96.8	99.2	99.5	100.9	96.8	106.8
P63028	Translationally-controlled tumor protein OS=Mus musculus OX=10090 GN=Tpt1 PE=1 SV=1	38	8	32	8	172	19.5	4.86	96.28	102.6	100.3	100.2	103.2	92.6	101.1
Q9Z0P5	Twinfilin-2 OS=Mus musculus OX=10090 GN=Twf2 PE=1 SV=1	45	13	23	11	349	39.4	6.8	70.54	100.7	100.3	98.4	99.3	102.5	98.8
Q9Z351	Potassium voltage-gated channel subfamily KQT member 2 OS=Mus musculus OX=10090 GN=Kcnq2 PE=1 SV=1	16	12	22	12	759	84.4	9.69	59.52	102.1	96.1	100	99.7	99.5	102.6
P68037	Ubiquitin-conjugating enzyme E2 L3 OS=Mus musculus OX=10090 GN=Ube2l3 PE=1 SV=1	56	8	22	8	154	17.9	8.51	76.58	102.2	102	101	96.5	98.5	99.8
Q8C2E7	WASH complex subunit 5 OS=Mus musculus OX=10090 GN=Washc5 PE=1 SV=2	13	13	18	13	1159	134	7.12	45.64	97.8	98	99.5	103.6	100.2	100.9
Q80VD1	Protein FAM98B OS=Mus musculus OX=10090 GN=Fam98b PE=1 SV=1	26	10	22	8	429	45.3	8.5	67.88	100.2	98	98.1	103.5	102.2	98
Q8BIP0	Aspartate--tRNA ligase, mitochondrial OS=Mus musculus OX=10090 GN=Dars2 PE=1 SV=1	20	12	20	12	653	74.1	6.98	57.28	97.1	97.7	98.2	98.8	107.1	101.2
Q01065	Calcium/calmodulin-dependent 3',5'-cyclic nucleotide phosphodiesterase 1B OS=Mus musculus OX=10090 GN=Pde1b PE=1 SV=2	26	12	26	12	535	61.2	5.72	77.81	108.2	98.3	96.2	101.9	101	94.4
Q9WVA4	Transgelin-2 OS=Mus musculus OX=10090 GN=Tagln2 PE=1 SV=4	46	10	34	8	199	22.4	8.24	85.63	98.5	102.2	100.7	95	104	99.7
A6H630	Damage-control phosphatase ARMT1 OS=Mus musculus OX=10090 GN=Armt1 PE=1 SV=1	33	14	24	14	439	50.5	5.92	72.83	102.9	99.1	97.3	96.7	107.1	96.9
Q8BVL9	Janus kinase and microtubule-interacting protein 1 OS=Mus musculus OX=10090 GN=Jakmip1 PE=1 SV=2	22	13	19	11	626	73.1	6.09	50	99.7	99.1	101.4	100.4	97.3	102.1
Q3TTY5	Keratin, type II cytoskeletal 2 epidermal OS=Mus musculus OX=10090 GN=Krt2 PE=1 SV=1	10	10	21	6	707	70.9	8.06	57.47	111	90.9	104.2	130.4	68.1	95.5
O35864	COP9 signalosome complex subunit 5 OS=Mus musculus OX=10090 GN=Cops5 PE=1 SV=3	39	10	17	10	334	37.5	6.54	60.29	99.2	99.5	99.4	102.3	102.3	97.4
Q91W43	Glycine dehydrogenase (decarboxylating), mitochondrial OS=Mus musculus OX=10090 GN=Gldc PE=1 SV=1	14	13	15	13	1025	113.2	7.56	53.1	100.3	99.9	97.4	97.9	106.9	97.6
Q3UEB3	Poly(U)-binding-splicing factor PUF60 OS=Mus musculus OX=10090 GN=Puf60 PE=1 SV=2	27	13	29	13	564	60.2	5.29	89.2	96.4	99.6	102	104.1	97.4	100.5
P47791	Glutathione reductase, mitochondrial OS=Mus musculus OX=10090 GN=Gsr PE=1 SV=3	21	10	30	10	500	53.6	7.99	94.44	98.2	99.7	98.5	99.2	99.7	104.7
Q8K0D0	Cyclin-dependent kinase 17 OS=Mus musculus OX=10090 GN=Cdk17 PE=1 SV=2	28	13	21	9	523	59.5	9.03	48.04	95.6	98.7	103.9	99.9	97.9	103.9
P97333	Neuropilin-1 OS=Mus musculus OX=10090 GN=Nrp1 PE=1 SV=2	13	12	23	12	923	102.9	5.9	68.71	99.2	98	102.2	99.8	98.9	101.9
P28352	DNA-(apurinic or apyrimidinic site) endonuclease OS=Mus musculus OX=10090 GN=Apex1 PE=1 SV=2	29	9	24	9	317	35.5	7.91	66.22	97.2	102.9	105.6	100.5	97.1	96.6
Q99J08	SEC14-like protein 2 OS=Mus musculus OX=10090 GN=Sec14l2 PE=1 SV=1	27	9	17	9	403	46.3	7.11	52.94	105.1	100.4	98.1	94.6	102.9	98.9
Q9CR95	Adaptin ear-binding coat-associated protein 1 OS=Mus musculus OX=10090 GN=Necap1 PE=1 SV=2	41	9	37	9	275	29.6	6.38	79.14	102.4	98	100.8	98	103	97.7
Q9ERB0	Synaptosomal-associated protein 29 OS=Mus musculus OX=10090 GN=Snap29 PE=1 SV=1	46	11	17	11	260	29.6	5.38	60.6	92.1	101.4	103.8	101.3	97.3	104.1
Q03173	Protein enabled homolog OS=Mus musculus OX=10090 GN=Enah PE=1 SV=2	18	14	31	14	802	85.8	7.72	65.01	96.7	100.9	101	99.6	100.7	101.1
P20108	Thioredoxin-dependent peroxide reductase, mitochondrial OS=Mus musculus OX=10090 GN=Prdx3 PE=1 SV=1	32	8	44	8	257	28.1	7.58	186.01	95.9	102.6	99.7	100.4	100.8	100.7
Q9R0Q7	Prostaglandin E synthase 3 OS=Mus musculus OX=10090 GN=Ptges3 PE=1 SV=1	40	8	22	8	160	18.7	4.55	75.57	100.7	102.3	99.7	97.6	101.1	98.7
P60840	Alpha-endosulfine OS=Mus musculus OX=10090 GN=Ensa PE=1 SV=1	66	11	30	10	121	13.3	7.24	85.58	104.6	100	101	95.9	98.8	99.6
A0A1W2P872	RNA-binding protein Nova-2 OS=Mus musculus OX=10090 GN=Nova2 PE=1 SV=1	37	14	19	9	492	49	8.16	57.65	98.5	101.6	100.7	103.9	96.2	99.1
P32037	Solute carrier family 2, facilitated glucose transporter member 3 OS=Mus musculus OX=10090 GN=Slc2a3 PE=1 SV=1	16	8	26	8	493	53.4	4.98	79.43	100.5	98.8	101.4	99.3	102.6	97.3
Q99LG2	Transportin-2 OS=Mus musculus OX=10090 GN=Tnpo2 PE=1 SV=1	13	13	33	6	887	100.4	4.98	77.16	97.4	100.7	100.2	101.4	102.8	97.6
P62073	Mitochondrial import inner membrane translocase subunit Tim10 OS=Mus musculus OX=10090 GN=Timm10 PE=1 SV=1	58	10	24	10	90	10.3	6.29	74.94	99	97.6	100.2	99.4	101.3	102.6
Q3ULD5	Methylcrotonoyl-CoA carboxylase beta chain, mitochondrial OS=Mus musculus OX=10090 GN=Mccc2 PE=1 SV=1	26	12	21	12	563	61.3	8	77.89	96.4	102.8	106.1	104.3	96	94.3
Q61033	Lamina-associated polypeptide 2, isoforms alpha/zeta OS=Mus musculus OX=10090 GN=Tmpo PE=1 SV=4	15	8	18	1	693	75.1	8.05	67.15	106.4	105.3	101.5	107.7	89.7	89.4
O35066	Kinesin-like protein KIF3C OS=Mus musculus OX=10090 GN=Kif3c PE=1 SV=3	21	15	19	9	796	89.9	8.06	52.63	94.4	95.4	95.6	97.5	104.7	112.4
Q9WUM3	Coronin-1B OS=Mus musculus OX=10090 GN=Coro1b PE=1 SV=1	26	14	29	14	484	53.9	5.78	78.65	102.2	99.5	98.6	98.9	102.6	98.2
P51655	Glypican-4 OS=Mus musculus OX=10090 GN=Gpc4 PE=1 SV=2	25	13	34	11	557	62.5	6.33	83.99	96.4	98.2	100.8	102.5	102.7	99.4
Q99JX3	Golgi reassembly-stacking protein 2 OS=Mus musculus OX=10090 GN=Gorasp2 PE=1 SV=3	27	11	23	10	451	47	4.79	66.49	97.7	103.5	104.3	98.6	96.3	99.7
Q9ERG2	Striatin-3 OS=Mus musculus OX=10090 GN=Strn3 PE=1 SV=1	17	11	18	8	796	87.1	5.29	60.16	98	98.9	99.3	98.4	102.2	103.3
Q9JI46	Diphosphoinositol polyphosphate phosphohydrolase 1 OS=Mus musculus OX=10090 GN=Nudt3 PE=1 SV=1	69	10	23	8	168	19	6.34	77.85	98.3	100.4	96.1	96.1	113	96
Q8CDA1	Phosphatidylinositide phosphatase SAC2 OS=Mus musculus OX=10090 GN=Inpp5f PE=1 SV=1	13	14	18	14	1132	127.5	7.11	40.8	99	98.7	102	98.7	100.8	100.8
Q9Z2I8	Succinate--CoA ligase [GDP-forming] subunit beta, mitochondrial OS=Mus musculus OX=10090 GN=Suclg2 PE=1 SV=3	27	13	20	13	433	46.8	7.02	55.74	101.4	94	102.4	104.2	96.6	101.5
A2A8L1	Chromodomain-helicase-DNA-binding protein 5 OS=Mus musculus OX=10090 GN=Chd5 PE=1 SV=1	7	15	19	4	1946	222.4	6.24	59.01	87.5	98.1	92.5	107.1	104.7	110.2
Q6IR34	G-protein-signaling modulator 1 OS=Mus musculus OX=10090 GN=Gpsm1 PE=1 SV=3	23	13	17	13	673	74.3	6.23	60.64	102.4	95.5	101.1	102.1	96.8	102.1
Q80WQ2	Protein VAC14 homolog OS=Mus musculus OX=10090 GN=Vac14 PE=1 SV=1	15	12	19	12	782	88	6.13	52.87	96.8	100	97.9	101.1	98.9	105.2
Q91YD9	Neural Wiskott-Aldrich syndrome protein OS=Mus musculus OX=10090 GN=Wasl PE=1 SV=1	33	13	18	13	501	54.2	7.93	51.87	93.9	104.3	96.9	99.2	98.8	106.9
O35621	Phosphomannomutase 1 OS=Mus musculus OX=10090 GN=Pmm1 PE=1 SV=1	45	11	21	9	262	29.8	5.47	63.54	94.4	100.6	99.7	102.4	98.7	104.2
Q8C3W1	Uncharacterized protein C1orf198 homolog OS=Mus musculus OX=10090 PE=1 SV=1	56	13	26	13	322	35.3	5.24	86.17	99.7	94	103.6	100	99.7	103
O08848	60 kDa SS-A/Ro ribonucleoprotein OS=Mus musculus OX=10090 GN=RO60 PE=1 SV=1	28	15	26	15	538	60.1	7.9	76.85	95.3	96.8	98.3	103.3	107.7	98.7
Q3TCH7	Cullin-4A OS=Mus musculus OX=10090 GN=Cul4a PE=1 SV=1	18	17	22	9	759	87.7	8.35	65.41	92.1	98.6	98.8	101.6	108.9	100
Q8VBW6	NEDD8-activating enzyme E1 regulatory subunit OS=Mus musculus OX=10090 GN=Nae1 PE=1 SV=1	26	11	21	11	534	60.2	5.52	70.57	98.8	99.2	100.5	99	99.6	103
Q8BWS5	G protein-regulated inducer of neurite outgrowth 3 OS=Mus musculus OX=10090 GN=Gprin3 PE=1 SV=1	20	13	19	13	763	80.4	7.02	52.55	96.3	100.8	102.2	95.7	102	103
Q9CQH3	NADH dehydrogenase [ubiquinone] 1 beta subcomplex subunit 5, mitochondrial OS=Mus musculus OX=10090 GN=Ndufb5 PE=1 SV=1	36	9	28	9	189	21.7	9.41	92.78	100.8	98.6	99.1	101.1	102.2	98.3
Q3TLI0	Trafficking protein particle complex subunit 10 OS=Mus musculus OX=10090 GN=Trappc10 PE=1 SV=3	12	15	21	15	1258	141.4	5.92	48.97	96.6	98.9	102.2	100.8	100.4	101
P84309	Adenylate cyclase type 5 OS=Mus musculus OX=10090 GN=Adcy5 PE=1 SV=2	15	14	26	14	1262	139	7.06	66.65	97.9	95.7	100.6	100.3	105.5	100
Q8R1X6	Spartin OS=Mus musculus OX=10090 GN=Spart PE=1 SV=1	22	15	18	15	671	72.6	5.86	48.49	102.3	98.2	100.7	96.2	99	103.5
Q91Z61	GTP-binding protein Di-Ras1 OS=Mus musculus OX=10090 GN=Diras1 PE=1 SV=1	53	10	21	7	198	22.3	8.9	64.78	97.1	99	99.6	105.1	94.6	104.5
Q6DIC0	Probable global transcription activator SNF2L2 OS=Mus musculus OX=10090 GN=Smarca2 PE=1 SV=1	10	15	20	10	1577	180.1	7.2	55.86	96	100.8	100.1	103.1	97.7	102.3
Q3UHX2	28 kDa heat- and acid-stable phosphoprotein OS=Mus musculus OX=10090 GN=Pdap1 PE=1 SV=1	40	8	21	8	181	20.6	7.39	74.27	97.8	100.5	102.2	100.4	95.6	103.5
Q9D898	Actin-related protein 2/3 complex subunit 5-like protein OS=Mus musculus OX=10090 GN=Arpc5l PE=1 SV=1	58	8	25	8	153	17	6.8	98.86	101.4	101	98.6	97.6	102.4	99
O08915	AH receptor-interacting protein OS=Mus musculus OX=10090 GN=Aip PE=1 SV=1	42	12	24	12	330	37.6	6.4	80.61	99.3	98.8	100.1	100.4	100.6	100.8
O35691	Pinin OS=Mus musculus OX=10090 GN=Pnn PE=1 SV=4	20	15	19	15	725	82.4	7.01	52.81	96.4	98.3	104	104.7	99	97.5
Q99NB1	Acetyl-coenzyme A synthetase 2-like, mitochondrial OS=Mus musculus OX=10090 GN=Acss1 PE=1 SV=1	24	12	22	12	682	74.6	6.98	61.45	99.6	97.2	103.7	100.6	101.1	97.9
O35887	Calumenin OS=Mus musculus OX=10090 GN=Calu PE=1 SV=1	34	9	28	9	315	37	4.67	96.55	95.9	99.7	102.5	100.3	97.8	103.8
Q9DAW9	Calponin-3 OS=Mus musculus OX=10090 GN=Cnn3 PE=1 SV=1	35	10	28	8	330	36.4	5.72	77.45	98.7	101.9	101.7	97.6	98.1	102
Q9JKB1	Ubiquitin carboxyl-terminal hydrolase isozyme L3 OS=Mus musculus OX=10090 GN=Uchl3 PE=1 SV=2	30	9	36	9	230	26.1	5.05	102.32	99.3	101.5	99	99.2	99.2	101.8
Q80TN7	Neuron navigator 3 OS=Mus musculus OX=10090 GN=Nav3 PE=1 SV=2	6	13	16	12	2359	252.1	8.76	34.68	90.9	107.7	105.5	103.5	86.3	106.2
Q8BW75	Amine oxidase [flavin-containing] B OS=Mus musculus OX=10090 GN=Maob PE=1 SV=4	28	14	24	13	520	58.5	8.29	73.04	105.4	99.1	101	97.4	102.1	95.1
P56371	Ras-related protein Rab-4A OS=Mus musculus OX=10090 GN=Rab4a PE=1 SV=2	40	8	21	5	218	24.4	6.07	75.55	95.5	100.4	97	103.6	99.9	103.5
D3YZI9	PiggyBac transposable element-derived protein 5 OS=Mus musculus OX=10090 GN=Pgbd5 PE=1 SV=1	23	11	20	11	523	58.3	8.85	67.58	96.2	100.4	99.3	102.1	99.2	102.9
Q99M87	DnaJ homolog subfamily A member 3, mitochondrial OS=Mus musculus OX=10090 GN=Dnaja3 PE=1 SV=1	24	12	14	12	480	52.4	9.22	47.24	101.6	98.6	102.6	99.1	98.7	99.4
Q99KV1	DnaJ homolog subfamily B member 11 OS=Mus musculus OX=10090 GN=Dnajb11 PE=1 SV=1	32	11	28	11	358	40.5	6.32	95.57	95.3	102.4	105	100.6	94	102.7
Q80ZJ1	Ras-related protein Rap-2a OS=Mus musculus OX=10090 GN=Rap2a PE=1 SV=2	55	9	24	5	183	20.6	4.82	82.81	105.5	95.6	99.4	96.8	106.9	95.9
Q8BHG1	Nardilysin OS=Mus musculus OX=10090 GN=Nrdc PE=1 SV=1	9	10	14	10	1161	132.8	4.87	42.52	96.1	100.3	102.2	102.4	93.6	105.3
B1AXH1	NHS-like protein 2 OS=Mus musculus OX=10090 GN=Nhsl2 PE=1 SV=2	12	12	21	12	1219	132.3	8.48	65.94	100.2	102.9	97.3	100.3	97.4	101.9
Q8C5W0	Calmin OS=Mus musculus OX=10090 GN=Clmn PE=1 SV=2	12	12	23	12	1052	117.2	5.03	60.08	101	99.3	99.1	100.4	97.6	102.6
Q99L45	Eukaryotic translation initiation factor 2 subunit 2 OS=Mus musculus OX=10090 GN=Eif2s2 PE=1 SV=1	40	11	17	11	331	38.1	5.8	54.7	94.2	104.5	103.3	101.6	95.3	101.1
Q9QXK3	Coatomer subunit gamma-2 OS=Mus musculus OX=10090 GN=Copg2 PE=1 SV=1	17	15	26	11	871	97.6	5.8	72.59	93.3	101.4	104.3	101.5	96.2	103.3
A2ASI5	Sodium channel protein type 3 subunit alpha OS=Mus musculus OX=10090 GN=Scn3a PE=1 SV=1	5	9	19	1	1947	220.7	5.72	59.64	110.5	100.1	116.1	85.2	93.1	95
Q9CR26	Vacuolar protein sorting-associated protein VTA1 homolog OS=Mus musculus OX=10090 GN=Vta1 PE=1 SV=1	34	10	16	10	309	33.9	6.13	55.03	99.2	102.5	101.4	100	99.1	97.8
P07356	Annexin A2 OS=Mus musculus OX=10090 GN=Anxa2 PE=1 SV=2	33	13	21	13	339	38.7	7.69	53.11	93.5	89.8	99.7	118.9	98.4	99.7
Q8VHL1	Histone-lysine N-methyltransferase SETD7 OS=Mus musculus OX=10090 GN=Setd7 PE=1 SV=2	34	10	25	10	366	40.5	4.65	77.12	100.3	99.8	96.8	101.1	100.2	101.8
Q9R1L5	Microtubule-associated serine/threonine-protein kinase 1 OS=Mus musculus OX=10090 GN=Mast1 PE=1 SV=3	11	18	19	16	1570	170.9	8.44	41.55	98.2	96.6	96.3	102.4	103.6	102.9
Q9CQF9	Prenylcysteine oxidase OS=Mus musculus OX=10090 GN=Pcyox1 PE=1 SV=1	24	9	16	9	505	56.5	6.92	58.03	100.1	101.8	102.8	99.9	95.1	100.4
Q9WVK8	Cholesterol 24-hydroxylase OS=Mus musculus OX=10090 GN=Cyp46a1 PE=1 SV=1	21	10	27	10	500	56.8	8.82	86.62	99	98.2	98	103.1	100.6	101.1
P63276	40S ribosomal protein S17 OS=Mus musculus OX=10090 GN=Rps17 PE=1 SV=2	57	7	23	7	135	15.5	9.85	76.84	94.9	101.5	102.2	102.4	96.6	102.4
Q9QYJ3	DnaJ homolog subfamily B member 1 OS=Mus musculus OX=10090 GN=Dnajb1 PE=1 SV=3	38	13	27	12	340	38.1	8.63	80.92	99	98	109.6	98.5	97.9	97.1
P62984	Ubiquitin-60S ribosomal protein L40 OS=Mus musculus OX=10090 GN=Uba52 PE=1 SV=2	60	9	143	1	128	14.7	9.83	377.49	98.2	102.3	99.9	98.2	94.1	107.2
Q9CR61	NADH dehydrogenase [ubiquinone] 1 beta subcomplex subunit 7 OS=Mus musculus OX=10090 GN=Ndufb7 PE=1 SV=3	61	7	21	7	137	16.3	8.18	80.99	101.6	96.9	101.3	97	105.2	98
P59759	Myocardin-related transcription factor B OS=Mus musculus OX=10090 GN=Mrtfb PE=1 SV=1	15	13	26	11	1080	117.5	6.16	72.18	96.1	100.9	98	100.5	101.8	102.7
Q99LE6	ATP-binding cassette sub-family F member 2 OS=Mus musculus OX=10090 GN=Abcf2 PE=1 SV=1	21	15	22	15	628	71.7	7.05	53.87	96.7	101.7	99.3	101	99.3	102
Q61187	Tumor susceptibility gene 101 protein OS=Mus musculus OX=10090 GN=Tsg101 PE=1 SV=2	26	9	15	9	391	44.1	6.71	62.13	100.2	102.6	100.3	100.9	98.2	97.8
Q61701	ELAV-like protein 4 OS=Mus musculus OX=10090 GN=Elavl4 PE=1 SV=1	25	9	20	2	385	42.3	9.38	65.71	96.6	99.3	99.5	109	95	100.7
Q9JJY3	Sphingomyelin phosphodiesterase 3 OS=Mus musculus OX=10090 GN=Smpd3 PE=1 SV=1	18	11	38	11	655	71.2	5.88	103	98.8	104	99.6	97.6	98.6	101.4
Q61739	Integrin alpha-6 OS=Mus musculus OX=10090 GN=Itga6 PE=1 SV=3	15	14	21	14	1091	122.1	7.03	51.67	93.4	98.8	99.9	109.5	92.6	105.8
P47740	Aldehyde dehydrogenase family 3 member A2 OS=Mus musculus OX=10090 GN=Aldh3a2 PE=1 SV=2	26	13	20	13	484	53.9	8.35	52.76	101.1	95.8	98.9	98.5	104.9	100.8
E9PUL5	Proline-rich transmembrane protein 2 OS=Mus musculus OX=10090 GN=Prrt2 PE=1 SV=1	36	7	47	7	346	35.9	4.63	143.42	106.5	100.1	99.7	94.1	104.4	95.2
Q8K1N1	Calcium-independent phospholipase A2-gamma OS=Mus musculus OX=10090 GN=Pnpla8 PE=1 SV=1	18	14	22	14	776	87.3	9.23	49.25	95.8	98.4	103.4	99.6	101.3	101.4
P83093	Stromal interaction molecule 2 OS=Mus musculus OX=10090 GN=Stim2 PE=1 SV=2	22	14	20	14	746	83.9	6.79	45.71	97.7	100.9	102.7	99.4	99.6	99.8
Q9JI90	E3 ubiquitin-protein ligase RNF14 OS=Mus musculus OX=10090 GN=Rnf14 PE=1 SV=2	18	10	23	10	485	54.9	4.7	73.84	95.5	100.3	98.4	98.8	101.5	105.4
Q8R307	Vacuolar protein sorting-associated protein 18 homolog OS=Mus musculus OX=10090 GN=Vps18 PE=1 SV=2	14	13	22	13	973	110.1	6.09	54.35	97.1	99.1	103.8	100.6	98.3	101.2
P02535	Keratin, type I cytoskeletal 10 OS=Mus musculus OX=10090 GN=Krt10 PE=1 SV=3	16	9	36	6	570	57.7	5.11	124.31	105.4	95.6	106.4	117.4	79.5	95.6
P32848	Parvalbumin alpha OS=Mus musculus OX=10090 GN=Pvalb PE=1 SV=3	92	13	26	13	110	11.9	5.19	46.03	103.2	96.3	99.4	103.7	101.2	96.2
Q925T6	Glutamate receptor-interacting protein 1 OS=Mus musculus OX=10090 GN=Grip1 PE=1 SV=1	14	15	22	15	1127	122	6.55	57.39	96.1	101.2	104.3	99	96.6	102.9
P25976	Nucleolar transcription factor 1 OS=Mus musculus OX=10090 GN=Ubtf PE=1 SV=1	20	17	26	17	765	89.5	5.76	55.06	93.7	102.3	97.6	103.2	98	105.3
Q3UJU9	Regulator of microtubule dynamics protein 3 OS=Mus musculus OX=10090 GN=Rmdn3 PE=1 SV=2	29	10	19	10	470	52	5.21	74.79	98.6	96.3	103	102.1	101.7	98.3
Q60972	Histone-binding protein RBBP4 OS=Mus musculus OX=10090 GN=Rbbp4 PE=1 SV=5	23	8	37	3	425	47.6	4.89	164.95	96	101.7	101.8	103.5	97.5	99.5
Q5PR73	GTP-binding protein Di-Ras2 OS=Mus musculus OX=10090 GN=Diras2 PE=1 SV=1	59	11	24	8	199	22.5	8.76	74.59	104.3	100.8	97.8	101.2	98.9	96.9
Q8JZK9	Hydroxymethylglutaryl-CoA synthase, cytoplasmic OS=Mus musculus OX=10090 GN=Hmgcs1 PE=1 SV=1	23	10	19	9	520	57.5	5.99	59.86	91.7	104.6	107.9	99.6	83.6	112.6
O08795	Glucosidase 2 subunit beta OS=Mus musculus OX=10090 GN=Prkcsh PE=1 SV=1	22	13	29	13	521	58.8	4.46	83.69	97.8	101.2	102.8	100.6	96	101.6
Q9Z2V5	Histone deacetylase 6 OS=Mus musculus OX=10090 GN=Hdac6 PE=1 SV=3	10	11	28	11	1149	125.7	5.78	92.66	97.5	101.3	101.5	99.2	99	101.5
Q921F4	Heterogeneous nuclear ribonucleoprotein L-like OS=Mus musculus OX=10090 GN=Hnrnpll PE=1 SV=3	24	10	15	10	591	64.1	5.85	61.94	97.5	99.9	102.4	102.7	98.2	99.4
Q99J85	Neuronal pentraxin receptor OS=Mus musculus OX=10090 GN=Nptxr PE=1 SV=1	24	12	22	11	493	52.3	6.13	61.94	97.3	100.7	102.2	96.5	96.2	107.1
P62717	60S ribosomal protein L18a OS=Mus musculus OX=10090 GN=Rpl18a PE=1 SV=1	45	10	20	10	176	20.7	10.71	71.64	95.3	101.6	104.9	103.1	95.6	99.6
Q9CS42	Ribose-phosphate pyrophosphokinase 2 OS=Mus musculus OX=10090 GN=Prps2 PE=1 SV=4	27	9	18	4	318	34.8	6.61	65.08	98.2	104.2	103.8	97.1	96.9	99.8
P41105	60S ribosomal protein L28 OS=Mus musculus OX=10090 GN=Rpl28 PE=1 SV=2	59	11	29	11	137	15.7	12.02	76.76	95.7	104.7	103.2	101.9	94.3	100.2
P16460	Argininosuccinate synthase OS=Mus musculus OX=10090 GN=Ass1 PE=1 SV=1	26	13	18	13	412	46.6	8.22	57.46	105.5	96.7	96.7	100.2	107.2	93.8
Q91YR7	Pre-mRNA-processing factor 6 OS=Mus musculus OX=10090 GN=Prpf6 PE=1 SV=1	16	15	25	15	941	106.7	8.09	62.95	92.5	97.4	102.3	102.6	101.3	104
Q64433	10 kDa heat shock protein, mitochondrial OS=Mus musculus OX=10090 GN=Hspe1 PE=1 SV=2	75	10	62	10	102	11	8.35	204.15	98.6	101.2	101	97.6	100.5	101.1
Q3UHK1	Proton myo-inositol cotransporter OS=Mus musculus OX=10090 GN=Slc2a13 PE=1 SV=2	18	11	22	11	637	69	6.86	63.36	97.1	103	102.6	101.4	96.5	99.5
Q8C7X2	ER membrane protein complex subunit 1 OS=Mus musculus OX=10090 GN=Emc1 PE=1 SV=1	11	13	19	13	997	111.5	7.43	59.6	96.1	100.2	103.6	102.8	95.9	101.4
Q922Q1	Mitochondrial amidoxime reducing component 2 OS=Mus musculus OX=10090 GN=Mtarc2 PE=1 SV=1	28	10	34	10	338	38.2	8.68	89.31	101.4	95.5	101	100.8	103.4	98
Q9Z1D1	Eukaryotic translation initiation factor 3 subunit G OS=Mus musculus OX=10090 GN=Eif3g PE=1 SV=2	24	9	18	9	320	35.6	5.9	57.93	97.4	100.3	100.9	102	96.9	102.5
Q9D554	Splicing factor 3A subunit 3 OS=Mus musculus OX=10090 GN=Sf3a3 PE=1 SV=2	29	14	27	14	501	58.8	5.34	78.99	96.9	101.6	101.6	101.5	95.5	102.8
Q8VCC9	Spondin-1 OS=Mus musculus OX=10090 GN=Spon1 PE=1 SV=1	20	14	19	14	807	90.8	6.02	56.04	99.3	101	100.5	98.9	99.9	100.4
Q9WTL7	Acyl-protein thioesterase 2 OS=Mus musculus OX=10090 GN=Lypla2 PE=1 SV=1	46	9	19	9	231	24.8	7.23	65.07	101.1	100.9	100.2	98.4	98.4	101.1
Q60996	Serine/threonine-protein phosphatase 2A 56 kDa regulatory subunit gamma isoform OS=Mus musculus OX=10090 GN=Ppp2r5c PE=1 SV=2	23	12	28	11	524	60.8	6.64	80.71	100	100.5	102.7	100	99	97.8
Q8CCN5	BCAS3 microtubule associated cell migration factor OS=Mus musculus OX=10090 GN=Bcas3 PE=1 SV=2	16	12	17	12	928	101	6.7	52.39	100.9	98.2	98.7	101	102.4	98.9
Q8R361	Rab11 family-interacting protein 5 OS=Mus musculus OX=10090 GN=Rab11fip5 PE=1 SV=2	25	13	28	13	645	69.5	9.07	75.52	95.8	97.9	102.7	103.2	99.8	100.5
Q923L3	CUB and sushi domain-containing protein 1 OS=Mus musculus OX=10090 GN=Csmd1 PE=1 SV=2	6	14	20	13	3564	387.6	6.1	42.84	94.4	100.1	100.6	106.1	92.8	106
P16388	Potassium voltage-gated channel subfamily A member 1 OS=Mus musculus OX=10090 GN=Kcna1 PE=1 SV=1	23	10	18	7	495	56.4	5.14	40.65	102.5	97.9	98.1	103.6	101.3	96.6
Q8R317	Ubiquilin-1 OS=Mus musculus OX=10090 GN=Ubqln1 PE=1 SV=1	14	6	26	4	582	61.9	4.94	108.23	95.7	98.4	103.4	97.9	102.4	102.2
Q62083	PRKCA-binding protein OS=Mus musculus OX=10090 GN=Pick1 PE=1 SV=2	29	12	19	11	416	46.6	5.52	55.92	99.2	100.2	98.4	98.9	101.3	101.9
Q9DCZ1	GMP reductase 1 OS=Mus musculus OX=10090 GN=Gmpr PE=1 SV=1	33	11	20	8	345	37.5	7.09	51.84	104.4	104	99.1	99.7	93.1	99.6
Q9QXG4	Acetyl-coenzyme A synthetase, cytoplasmic OS=Mus musculus OX=10090 GN=Acss2 PE=1 SV=2	19	12	19	12	701	78.8	6.64	58.02	98	100.5	99.8	100.2	97.8	103.7
Q62159	Rho-related GTP-binding protein RhoC OS=Mus musculus OX=10090 GN=Rhoc PE=1 SV=2	33	7	29	1	193	22	6.58	113.59	95.1	106.3	98.3	96.9	104.1	99.3
Q8BTG7	Protein NDRG4 OS=Mus musculus OX=10090 GN=Ndrg4 PE=1 SV=1	29	7	20	7	352	38.5	6.32	72.67	96.3	98.7	101.2	101.5	99	103.2
Q9R257	Heme-binding protein 1 OS=Mus musculus OX=10090 GN=Hebp1 PE=1 SV=2	55	8	18	8	190	21.1	5.26	60.52	78.6	104.5	103.2	99.3	108	106.4
Q8K341	Alpha-tubulin N-acetyltransferase 1 OS=Mus musculus OX=10090 GN=Atat1 PE=1 SV=1	31	12	29	12	421	47.1	9.98	74.75	95.1	101.6	102.5	103.5	94.5	102.8
Q9QYS9	Protein quaking OS=Mus musculus OX=10090 GN=Qki PE=1 SV=1	29	11	23	10	341	37.6	8.56	79.97	98.8	99.5	99.2	98.6	97.7	106.1
A2A699	Protein FAM171A2 OS=Mus musculus OX=10090 GN=Fam171a2 PE=1 SV=1	15	10	26	10	822	87.4	8.05	76.71	97.9	99.3	100.8	99.8	102.6	99.6
P19253	60S ribosomal protein L13a OS=Mus musculus OX=10090 GN=Rpl13a PE=1 SV=4	41	11	43	11	203	23.4	11.02	110.42	95.3	101.6	103.9	101.1	95.2	102.8
Q8BX10	Serine/threonine-protein phosphatase PGAM5, mitochondrial OS=Mus musculus OX=10090 GN=Pgam5 PE=1 SV=1	40	11	26	11	288	32	9.04	86.18	98.4	102.3	101.6	103.6	92.6	101.5
Q60675	Laminin subunit alpha-2 OS=Mus musculus OX=10090 GN=Lama2 PE=1 SV=2	5	14	22	14	3118	343.6	6.09	39.05	98.7	93.3	99.3	106.2	100.9	101.6
P70182	Phosphatidylinositol 4-phosphate 5-kinase type-1 alpha OS=Mus musculus OX=10090 GN=Pip5k1a PE=1 SV=2	21	11	28	8	546	60.4	8.59	89.25	99.9	101	98.1	99.2	102.1	99.7
P04925	Major prion protein OS=Mus musculus OX=10090 GN=Prnp PE=1 SV=2	20	7	44	7	254	28	9.33	123.85	105.6	98.5	98.4	97.9	98.7	100.8
P31648	Sodium- and chloride-dependent GABA transporter 1 OS=Mus musculus OX=10090 GN=Slc6a1 PE=1 SV=2	16	7	24	7	599	67	7.96	90.89	99.7	99	99.4	100.4	105.2	96.4
Q9Z2H2	Regulator of G-protein signaling 6 OS=Mus musculus OX=10090 GN=Rgs6 PE=1 SV=2	29	12	23	8	472	54.5	7.42	71.76	101.2	98.6	99.3	102.7	101.5	96.7
Q9WUA6	RAC-gamma serine/threonine-protein kinase OS=Mus musculus OX=10090 GN=Akt3 PE=1 SV=1	29	11	26	8	479	55.7	6.02	92.26	96.9	101.4	103.6	99	97.5	101.6
Q9EPE9	Endoplasmic reticulum transmembrane helix translocase OS=Mus musculus OX=10090 GN=Atp13a1 PE=1 SV=2	11	12	20	12	1200	132.3	8.03	52.75	96.2	98.6	101.1	101.4	98.4	104.2
Q9ET77	Junctophilin-3 OS=Mus musculus OX=10090 GN=Jph3 PE=1 SV=1	17	12	26	12	744	81.2	9.22	63.55	100.6	103.9	98.4	99.4	98	99.8
P53395	Lipoamide acyltransferase component of branched-chain alpha-keto acid dehydrogenase complex, mitochondrial OS=Mus musculus OX=10090 GN=Dbt PE=1 SV=2	21	10	21	10	482	53.2	8.6	65.04	103.2	100.6	99.2	99.3	100	97.7
Q62172	RalA-binding protein 1 OS=Mus musculus OX=10090 GN=Ralbp1 PE=1 SV=4	20	12	26	12	648	75	5.92	64.31	97.2	99.2	101.3	97.9	104.6	99.7
Q8BXK8	Arf-GAP with GTPase, ANK repeat and PH domain-containing protein 1 OS=Mus musculus OX=10090 GN=Agap1 PE=1 SV=1	14	10	23	7	857	94.4	7.94	72.31	96.6	99.7	97.8	100.5	103.9	101.4
P59325	Eukaryotic translation initiation factor 5 OS=Mus musculus OX=10090 GN=Eif5 PE=1 SV=1	25	11	28	11	429	48.9	5.52	74.27	100.5	102.6	103.6	98.9	91.7	102.8
P35802	Neuronal membrane glycoprotein M6-a OS=Mus musculus OX=10090 GN=Gpm6a PE=1 SV=1	24	8	43	8	278	31.1	5.27	140.23	103.7	101.1	99.3	97	104	94.9
P52196	Thiosulfate sulfurtransferase OS=Mus musculus OX=10090 GN=Tst PE=1 SV=3	41	13	28	13	297	33.4	7.85	75.98	100.4	98.2	97.1	101.1	104.7	98.5
P70408	Cadherin-10 OS=Mus musculus OX=10090 GN=Cdh10 PE=1 SV=3	18	15	33	12	788	88.3	4.94	63.87	99.3	103.5	99	98.4	98.9	100.9
P57776	Elongation factor 1-delta OS=Mus musculus OX=10090 GN=Eef1d PE=1 SV=3	38	11	24	10	281	31.3	5.02	58.79	100.5	100.3	100.4	100.9	94.1	103.8
Q9JHW2	Omega-amidase NIT2 OS=Mus musculus OX=10090 GN=Nit2 PE=1 SV=1	37	9	15	9	276	30.5	6.9	51.43	99.9	101.2	97.8	99.1	100.2	101.8
P20060	Beta-hexosaminidase subunit beta OS=Mus musculus OX=10090 GN=Hexb PE=1 SV=2	21	14	22	14	536	61.1	8.12	63.74	95.9	103.4	101.6	100.2	100.1	98.8
Q8R0A5	Transcription elongation factor A protein-like 3 OS=Mus musculus OX=10090 GN=Tceal3 PE=1 SV=2	62	12	42	3	200	22.5	5.44	80.56	98.7	98.3	95.1	103.1	106	98.7
Q6P9Q6	FK506-binding protein 15 OS=Mus musculus OX=10090 GN=Fkbp15 PE=1 SV=2	10	12	28	12	1216	132.9	5.07	68.75	97.6	100.8	101.9	102.9	96.7	100.1
Q68FM6	Protein phosphatase 1 regulatory subunit 29 OS=Mus musculus OX=10090 GN=Elfn2 PE=1 SV=1	18	14	22	13	823	90	7.52	59.28	98.6	101.3	100.7	98.6	103	97.8
Q6PGC1	ATP-dependent RNA helicase DHX29 OS=Mus musculus OX=10090 GN=Dhx29 PE=1 SV=1	12	15	18	15	1365	153.9	7.94	38.96	93.3	102.1	97.1	105	95.4	107
Q80TL1	Adenylate cyclase type 2 OS=Mus musculus OX=10090 GN=Adcy2 PE=1 SV=2	11	11	20	11	1090	123.2	8.31	59.94	100.7	99.4	96.7	104.6	101.4	97.2
Q8BHJ7	Gamma-aminobutyric acid receptor subunit alpha-5 OS=Mus musculus OX=10090 GN=Gabra5 PE=1 SV=1	21	11	20	5	463	52.2	9.01	52.07	94.5	104.1	100.4	101.4	97.7	102
Q8C3Q5	Protein shisa-7 OS=Mus musculus OX=10090 GN=Shisa7 PE=1 SV=3	19	11	28	11	558	58.3	9.82	69.92	96.9	102.1	103	94.2	102.2	101.6
Q62443	Neuronal pentraxin-1 OS=Mus musculus OX=10090 GN=Nptx1 PE=1 SV=1	29	14	22	14	432	47.1	6.44	72.28	100.2	102.2	97.6	96.2	102.2	101.6
Q8C878	NEDD8-activating enzyme E1 catalytic subunit OS=Mus musculus OX=10090 GN=Uba3 PE=1 SV=2	27	11	22	11	462	51.7	5.45	71.3	99.3	98.3	98.1	101.4	102.4	100.5
Q924N4	Solute carrier family 12 member 6 OS=Mus musculus OX=10090 GN=Slc12a6 PE=1 SV=2	12	14	23	8	1150	127.4	7.03	65	95.2	98	97.2	103.4	102.9	103.3
Q62393	Tumor protein D52 OS=Mus musculus OX=10090 GN=Tpd52 PE=1 SV=2	61	9	14	9	224	24.3	4.72	55.54	100.8	95.8	95.6	100.7	103.7	103.4
Q3UHB8	Coiled-coil domain-containing protein 177 OS=Mus musculus OX=10090 GN=Ccdc177 PE=1 SV=1	22	15	20	15	706	79.8	10.8	52.29	101.7	98.8	100	97.6	103.2	98.8
P61759	Prefoldin subunit 3 OS=Mus musculus OX=10090 GN=Vbp1 PE=1 SV=2	58	13	27	13	196	22.4	6.28	70.62	101	100.9	101.1	99.3	96.1	101.5
Q9CQI3	Glia maturation factor beta OS=Mus musculus OX=10090 GN=Gmfb PE=1 SV=3	46	8	27	8	142	16.7	5.16	102.05	102.7	101.1	99.7	95.5	103	97.9
Q3U5Q7	UMP-CMP kinase 2, mitochondrial OS=Mus musculus OX=10090 GN=Cmpk2 PE=1 SV=2	32	11	21	11	447	50	7.27	73.7	101	99.3	99.3	102.5	97.8	100
P35293	Ras-related protein Rab-18 OS=Mus musculus OX=10090 GN=Rab18 PE=1 SV=2	44	8	33	8	206	23	5.36	114.84	100.7	102	101.8	98.1	96.6	100.6
Q9CYR6	Phosphoacetylglucosamine mutase OS=Mus musculus OX=10090 GN=Pgm3 PE=1 SV=1	20	11	21	11	542	59.4	6.2	51.69	103.4	100.6	101.4	99.7	93.2	101.7
P31786	Acyl-CoA-binding protein OS=Mus musculus OX=10090 GN=Dbi PE=1 SV=2	71	6	48	6	87	10	8.82	199.01	103	99.9	104.3	97.4	94.9	100.4
P61028	Ras-related protein Rab-8B OS=Mus musculus OX=10090 GN=Rab8b PE=1 SV=1	45	12	31	6	207	23.6	9.07	90.15	100.5	100.4	101.2	95.9	103.9	98.2
Q5EBJ4	Ermin OS=Mus musculus OX=10090 GN=Ermn PE=1 SV=1	52	10	29	10	281	32.1	4.59	111.25	114.4	86.3	94.5	87.1	111.4	106.3
Q6NZM9	Histone deacetylase 4 OS=Mus musculus OX=10090 GN=Hdac4 PE=1 SV=1	12	11	15	10	1076	118.5	6.92	42.97	94.3	100.5	103.9	100.4	97.5	103.4
Q62277	Synaptophysin OS=Mus musculus OX=10090 GN=Syp PE=1 SV=2	21	8	61	8	314	34	4.94	158.32	101.2	97	98.5	105.3	102.2	95.9
P57759	Endoplasmic reticulum resident protein 29 OS=Mus musculus OX=10090 GN=Erp29 PE=1 SV=2	31	9	26	9	262	28.8	6.15	84.52	95.7	100.9	103.2	107.9	91.8	100.4
Q99M51	Cytoplasmic protein NCK1 OS=Mus musculus OX=10090 GN=Nck1 PE=1 SV=1	31	11	15	11	377	42.9	6.47	49.47	97.4	97	101.7	99.4	100.9	103.7
Q80YD1	ATP-dependent RNA helicase SUPV3L1, mitochondrial OS=Mus musculus OX=10090 GN=Supv3l1 PE=1 SV=1	17	11	21	11	779	87	7.84	62.15	98.5	101.5	99.3	101.9	97.8	101.1
P10639	Thioredoxin OS=Mus musculus OX=10090 GN=Txn PE=1 SV=3	59	8	37	8	105	11.7	4.92	117.83	102.5	99.8	99.7	99.5	96.4	102.1
Q8JZW4	Copine-5 OS=Mus musculus OX=10090 GN=Cpne5 PE=1 SV=1	19	9	16	5	593	65.6	5.77	58.05	99.6	95.8	100.1	103.7	103.7	97.1
O09111	NADH dehydrogenase [ubiquinone] 1 beta subcomplex subunit 11, mitochondrial OS=Mus musculus OX=10090 GN=Ndufb11 PE=1 SV=2	50	6	24	6	151	17.4	5.22	75.44	101.1	99.7	100	99.6	101.4	98.3
Q5DTN8	Janus kinase and microtubule-interacting protein 3 OS=Mus musculus OX=10090 GN=Jakmip3 PE=1 SV=2	19	15	20	13	844	98.7	5.74	42.89	96.3	98.2	100.5	99.4	102.2	103.5
Q8VE47	Ubiquitin-like modifier-activating enzyme 5 OS=Mus musculus OX=10090 GN=Uba5 PE=1 SV=2	22	8	15	8	403	44.8	4.96	54.57	99.1	98.9	102.7	97.2	101.4	100.7
Q9QZD9	Eukaryotic translation initiation factor 3 subunit I OS=Mus musculus OX=10090 GN=Eif3i PE=1 SV=1	30	10	31	10	325	36.4	5.64	83.45	99.1	102	104.2	98.4	94	102.4
Q6DFV7	Nuclear receptor coactivator 7 OS=Mus musculus OX=10090 GN=Ncoa7 PE=1 SV=2	12	10	14	10	943	106.3	5.43	49.2	98.7	93.6	99.6	97.8	106	104.3
P62242	40S ribosomal protein S8 OS=Mus musculus OX=10090 GN=Rps8 PE=1 SV=2	46	10	31	10	208	24.2	10.32	106.82	93.7	102.8	101.4	103.4	98	100.7
Q61687	Transcriptional regulator ATRX OS=Mus musculus OX=10090 GN=Atrx PE=1 SV=3	6	14	18	14	2476	278.4	6.68	37.79	86.9	100.4	93.7	110.3	99	109.6
Q9CXJ4	Mitochondrial potassium channel ATP-binding subunit OS=Mus musculus OX=10090 GN=Abcb8 PE=1 SV=1	21	16	27	16	717	78	9.07	50.25	97.2	101.1	98.5	103.6	99.6	99.9
Q9EP89	Serine beta-lactamase-like protein LACTB, mitochondrial OS=Mus musculus OX=10090 GN=Lactb PE=1 SV=1	21	11	24	11	551	60.7	8.9	58.99	103.6	95.2	102.1	98.8	100.7	99.6
Q9CR00	26S proteasome non-ATPase regulatory subunit 9 OS=Mus musculus OX=10090 GN=Psmd9 PE=1 SV=1	42	8	22	8	222	24.7	6.43	70.13	97.1	97.8	99.4	99.2	105.7	100.9
Q9JIS8	Solute carrier family 12 member 4 OS=Mus musculus OX=10090 GN=Slc12a4 PE=1 SV=2	10	11	23	4	1085	120.5	6.67	65.36	89.5	101	105.7	102.7	88	113
Q9JK42	[Pyruvate dehydrogenase (acetyl-transferring)] kinase isozyme 2, mitochondrial OS=Mus musculus OX=10090 GN=Pdk2 PE=1 SV=2	28	11	28	6	407	46	6.61	92.26	104.7	94.2	98.5	100.7	102.5	99.4
B9EJ86	Oxysterol-binding protein-related protein 8 OS=Mus musculus OX=10090 GN=Osbpl8 PE=1 SV=1	15	12	18	12	889	101.2	6.96	65.43	98.7	97.9	99.5	101.2	100.2	102.4
P48024	Eukaryotic translation initiation factor 1 OS=Mus musculus OX=10090 GN=Eif1 PE=1 SV=2	65	7	13	7	113	12.7	7.44	63.54	95.1	98.5	102.1	101.8	97.1	105.3
Q8K019	Bcl-2-associated transcription factor 1 OS=Mus musculus OX=10090 GN=Bclaf1 PE=1 SV=2	15	15	24	14	919	105.9	9.99	59.2	96.4	102.1	102	103.5	94	102.1
P35290	Ras-related protein Rab-24 OS=Mus musculus OX=10090 GN=Rab24 PE=1 SV=2	46	9	22	9	203	23.1	6.23	76.56	98.5	102.2	104.1	100.6	94	100.6
Q9CXY6	Interleukin enhancer-binding factor 2 OS=Mus musculus OX=10090 GN=Ilf2 PE=1 SV=1	28	10	30	10	390	43	5.26	106.86	98.9	99.9	102.9	103.8	97.2	97.4
Q62442	Vesicle-associated membrane protein 1 OS=Mus musculus OX=10090 GN=Vamp1 PE=1 SV=1	44	6	21	3	118	12.9	6.65	73.6	102.2	92.7	98.5	100.3	110.4	95.9
Q8CIP4	MAP/microtubule affinity-regulating kinase 4 OS=Mus musculus OX=10090 GN=Mark4 PE=1 SV=1	20	15	24	14	752	82.6	9.67	60.75	98.1	103.2	100.3	102.8	94	101.8
Q3UJD6	Ubiquitin carboxyl-terminal hydrolase 19 OS=Mus musculus OX=10090 GN=Usp19 PE=1 SV=1	13	14	18	14	1360	150.5	6.38	44.23	96	96.5	100.6	101.9	102.3	102.7
Q60610	Rho guanine nucleotide exchange factor TIAM1 OS=Mus musculus OX=10090 GN=Tiam1 PE=1 SV=1	11	16	23	15	1591	177.4	6.67	59.75	99.8	97.9	99.2	102.2	99.4	101.4
Q9D8X2	Coiled-coil domain-containing protein 124 OS=Mus musculus OX=10090 GN=Ccdc124 PE=1 SV=1	52	14	17	14	217	25.3	9.64	45.54	98.6	100.6	103	99	93	105.8
Q6PHU5	Sortilin OS=Mus musculus OX=10090 GN=Sort1 PE=1 SV=1	16	16	29	15	825	91.1	5.88	70.76	100.2	100.7	99.9	99.1	98.9	101.2
P62911	60S ribosomal protein L32 OS=Mus musculus OX=10090 GN=Rpl32 PE=1 SV=2	50	11	29	11	135	15.9	11.33	90.36	94.7	102.1	103.8	100.6	97.9	100.9
Q80TM9	Nischarin OS=Mus musculus OX=10090 GN=Nisch PE=1 SV=2	9	13	19	13	1593	174.9	5.16	47.5	101.3	99.4	99.1	97.1	100.4	102.8
O08585	Clathrin light chain A OS=Mus musculus OX=10090 GN=Clta PE=1 SV=2	34	13	56	12	235	25.6	4.58	139.71	106.9	99.1	97.7	97.6	102.3	96.5
Q99KH8	Serine/threonine-protein kinase 24 OS=Mus musculus OX=10090 GN=Stk24 PE=1 SV=1	28	12	17	10	431	47.9	5.43	52.65	102.7	99	96.7	97	103.3	101.4
Q9Z2D1	Myotubularin-related protein 2 OS=Mus musculus OX=10090 GN=Mtmr2 PE=1 SV=3	24	13	18	13	643	73.2	7.25	50.3	101.6	96.8	98.9	99.2	101.8	101.8
Q71M36	Chondroitin sulfate proteoglycan 5 OS=Mus musculus OX=10090 GN=Cspg5 PE=1 SV=2	13	7	38	7	566	60.4	4.54	126.81	100.5	95.1	101.6	103.3	102	97.6
Q6ZWN5	40S ribosomal protein S9 OS=Mus musculus OX=10090 GN=Rps9 PE=1 SV=3	52	15	34	15	194	22.6	10.65	84.29	95.8	104.3	102.5	104.2	93.3	100
Q8BJI1	Sodium-dependent neutral amino acid transporter SLC6A17 OS=Mus musculus OX=10090 GN=Slc6a17 PE=1 SV=1	14	10	24	8	727	81	6.23	61.38	98.7	103.5	97.8	101.6	97.6	100.9
Q9Z2X1	Heterogeneous nuclear ribonucleoprotein F OS=Mus musculus OX=10090 GN=Hnrnpf PE=1 SV=3	25	8	24	6	415	45.7	5.49	86.79	98.9	101.2	101.1	101.1	96.7	100.9
Q9CRD0	OCIA domain-containing protein 1 OS=Mus musculus OX=10090 GN=Ociad1 PE=1 SV=1	48	10	21	10	247	27.6	7.81	68.58	96.7	99.3	100.1	101.7	100.2	102
Q99020	Heterogeneous nuclear ribonucleoprotein A/B OS=Mus musculus OX=10090 GN=Hnrnpab PE=1 SV=1	31	9	34	8	285	30.8	7.91	105.28	96.7	100	101.8	100.9	102.3	98.2
Q5U4C1	G-protein coupled receptor-associated sorting protein 1 OS=Mus musculus OX=10090 GN=Gprasp1 PE=1 SV=1	10	10	12	10	1347	151.7	5.08	32.21	92.3	97.6	100.5	106.1	98	105.5
Q9QZ06	Toll-interacting protein OS=Mus musculus OX=10090 GN=Tollip PE=1 SV=1	36	10	22	10	274	30.3	5.17	55.36	101	97.1	99.2	100.3	100.6	101.7
Q60673	Receptor-type tyrosine-protein phosphatase-like N OS=Mus musculus OX=10090 GN=Ptprn PE=1 SV=2	16	12	14	11	979	106	7.09	43.24	98.4	95.9	102.1	98.5	95.4	109.8
Q03157	Amyloid beta precursor like protein 1 OS=Mus musculus OX=10090 GN=Aplp1 PE=1 SV=2	21	14	27	13	654	72.8	5.67	76.35	99	94	99.6	99.2	100.8	107.4
Q99JR1	Sideroflexin-1 OS=Mus musculus OX=10090 GN=Sfxn1 PE=1 SV=3	34	11	27	11	322	35.6	9.23	79.67	100.5	99.6	99.2	99.8	100.7	100.3
P61082	NEDD8-conjugating enzyme Ubc12 OS=Mus musculus OX=10090 GN=Ube2m PE=1 SV=1	53	11	33	11	183	20.9	7.69	91.08	101.7	101.5	100.3	98.2	97.4	101
P35283	Ras-related protein Rab-12 OS=Mus musculus OX=10090 GN=Rab12 PE=1 SV=3	45	13	31	12	243	27.3	8.41	88.98	97.1	102.2	100.7	101.1	100	98.8
O88444	Adenylate cyclase type 1 OS=Mus musculus OX=10090 GN=Adcy1 PE=1 SV=2	14	12	17	12	1118	123.3	8.47	45.62	100.7	101.4	99.6	100.5	99.5	98.3
Q7TSQ8	Pyruvate dehydrogenase phosphatase regulatory subunit, mitochondrial OS=Mus musculus OX=10090 GN=Pdpr PE=1 SV=1	14	12	17	12	878	99.2	6.35	52.08	97.4	104.3	102.1	97.9	97.3	101.1
Q9CZR8	Elongation factor Ts, mitochondrial OS=Mus musculus OX=10090 GN=Tsfm PE=1 SV=1	36	8	13	8	324	35.3	7.06	51.01	97.5	97.2	98.5	106.1	100.8	99.9
Q8VHQ9	Acyl-coenzyme A thioesterase 11 OS=Mus musculus OX=10090 GN=Acot11 PE=1 SV=1	23	12	19	12	594	67.3	6.8	52.48	96.5	101.4	102.4	100	101.7	97.9
P20065	Thymosin beta-4 OS=Mus musculus OX=10090 GN=Tmsb4x PE=1 SV=1	50	9	64	6	50	5.7	5.06	141.95	101.2	106.1	97.6	98.2	92.9	104.1
P63080	Gamma-aminobutyric acid receptor subunit beta-3 OS=Mus musculus OX=10090 GN=Gabrb3 PE=1 SV=1	21	10	23	7	473	54.1	9.1	78.72	95.3	102.5	97.8	97.1	99.3	107.9
Q9Z315	U4/U6.U5 tri-snRNP-associated protein 1 OS=Mus musculus OX=10090 GN=Sart1 PE=1 SV=1	16	10	13	10	806	90.8	5.82	37.73	92.8	96.2	104	105.3	97.6	104
Q7TPS5	C2 domain-containing protein 5 OS=Mus musculus OX=10090 GN=C2cd5 PE=1 SV=2	13	12	19	12	1016	111.6	5.78	53.06	101.2	100.3	99.8	99.9	98.9	99.8
P97390	Vacuolar protein sorting-associated protein 45 OS=Mus musculus OX=10090 GN=Vps45 PE=1 SV=1	18	11	19	11	570	65	8.25	57.92	98.4	99.6	99.8	99.8	98.5	103.8
Q9D5T0	Outer mitochondrial transmembrane helix translocase OS=Mus musculus OX=10090 GN=Atad1 PE=1 SV=1	35	10	19	10	361	40.7	6.9	55.66	99.2	100.9	102.4	101.3	96.8	99.4
Q8CBE3	WD repeat-containing protein 37 OS=Mus musculus OX=10090 GN=Wdr37 PE=1 SV=1	21	12	20	12	496	55	7.23	62.87	102.9	99.2	99.3	101.7	98.5	98.3
Q8R1N4	NudC domain-containing protein 3 OS=Mus musculus OX=10090 GN=Nudcd3 PE=1 SV=3	33	11	19	11	363	40.9	5.26	56.4	95.5	99.4	93.9	102.2	103.3	105.6
P35585	AP-1 complex subunit mu-1 OS=Mus musculus OX=10090 GN=Ap1m1 PE=1 SV=3	28	10	24	10	423	48.5	7.3	78.38	97.9	100.8	99	102.4	99.6	100.3
Q59J78	NADH dehydrogenase [ubiquinone] 1 alpha subcomplex assembly factor 2 OS=Mus musculus OX=10090 GN=Ndufaf2 PE=1 SV=1	48	10	23	10	168	19.6	8.25	76.88	108.2	95.4	100.9	100.7	95.4	99.5
Q8VH51	RNA-binding protein 39 OS=Mus musculus OX=10090 GN=Rbm39 PE=1 SV=2	19	9	18	9	530	59.4	10.1	56.33	93.7	102	101.9	102.6	99.9	99.9
Q8VHI6	Wiskott-Aldrich syndrome protein family member 3 OS=Mus musculus OX=10090 GN=Wasf3 PE=1 SV=1	18	12	28	8	501	55.2	6.37	66.72	98.4	102.6	96.6	97.5	103.6	101.3
Q8BHZ0	CYFIP-related Rac1 interactor A OS=Mus musculus OX=10090 GN=Cyria PE=1 SV=1	33	8	20	6	323	37.3	6.01	71.65	95.3	98.5	102.3	103.2	99.5	101.2
Q9QX47	Protein SON OS=Mus musculus OX=10090 GN=Son PE=1 SV=2	7	13	16	12	2444	265.5	5.6	39.64	99.3	89.8	104.2	96.9	103.5	106.3
P63216	Guanine nucleotide-binding protein G(I)/G(S)/G(O) subunit gamma-3 OS=Mus musculus OX=10090 GN=Gng3 PE=1 SV=1	81	5	22	5	75	8.3	7.78	73.8	102.5	99.1	100.5	101.8	99.4	96.7
Q91YW3	DnaJ homolog subfamily C member 3 OS=Mus musculus OX=10090 GN=Dnajc3 PE=1 SV=1	24	14	21	14	504	57.4	5.85	59.57	94.4	99.1	106.1	101.5	94.7	104.2
O54781	SRSF protein kinase 2 OS=Mus musculus OX=10090 GN=Srpk2 PE=1 SV=2	15	10	14	7	681	76.7	4.91	45.86	95	99.7	102.8	101.5	98.5	102.6
Q9R0H0	Peroxisomal acyl-coenzyme A oxidase 1 OS=Mus musculus OX=10090 GN=Acox1 PE=1 SV=5	16	10	19	10	661	74.6	8.48	61.09	91.2	101	103.5	103	98	103.3
P63323	40S ribosomal protein S12 OS=Mus musculus OX=10090 GN=Rps12 PE=1 SV=2	53	8	23	8	132	14.5	7.24	88.24	94.8	105.6	102	104.1	91.6	101.9
Q9WV02	RNA-binding motif protein, X chromosome OS=Mus musculus OX=10090 GN=Rbmx PE=1 SV=1	34	17	55	2	391	42.3	10.05	113.68	109	93.6	105	100.7	91.2	100.5
P54285	Voltage-dependent L-type calcium channel subunit beta-3 OS=Mus musculus OX=10090 GN=Cacnb3 PE=1 SV=2	23	9	21	5	484	54.5	6.27	66.17	96.5	96.4	100.9	100.2	103.1	102.8
Q5M8N0	CB1 cannabinoid receptor-interacting protein 1 OS=Mus musculus OX=10090 GN=Cnrip1 PE=1 SV=1	50	8	28	8	164	18.6	7.96	98.63	99.3	101.3	101.1	100.9	98	99.5
Q9D1M0	Protein SEC13 homolog OS=Mus musculus OX=10090 GN=Sec13 PE=1 SV=3	31	10	21	10	322	35.5	5.38	62.47	101	101.7	100.2	100.8	97.6	98.7
Q9Z103	Activity-dependent neuroprotector homeobox protein OS=Mus musculus OX=10090 GN=Adnp PE=1 SV=2	14	12	16	12	1108	124.2	6.86	43.17	91.7	102	103.8	102.2	94.7	105.6
Q9DB15	39S ribosomal protein L12, mitochondrial OS=Mus musculus OX=10090 GN=Mrpl12 PE=1 SV=2	30	7	16	7	201	21.7	9.29	47.41	95.5	100.5	102.8	102.2	94.8	104.3
Q6PFD9	Nuclear pore complex protein Nup98-Nup96 OS=Mus musculus OX=10090 GN=Nup98 PE=1 SV=2	9	12	18	12	1816	197.1	6.18	45.65	99.1	98.3	99	100.9	99.9	102.8
Q7TN98	Cytoplasmic polyadenylation element-binding protein 4 OS=Mus musculus OX=10090 GN=Cpeb4 PE=1 SV=1	18	11	16	6	729	80.1	7.18	46.97	95.8	99.6	102.8	102.9	96.4	102.5
Q923S9	Ras-related protein Rab-30 OS=Mus musculus OX=10090 GN=Rab30 PE=1 SV=1	48	11	27	8	203	23	4.97	80.39	97.5	102.7	99.4	101.8	96.6	102
B2RUJ5	Amyloid-beta A4 precursor protein-binding family A member 1 OS=Mus musculus OX=10090 GN=Apba1 PE=1 SV=2	20	11	18	10	842	92.9	4.88	59.62	99.9	97.2	100.1	100.1	99.8	102.9
Q3UX10	Tubulin alpha chain-like 3 OS=Mus musculus OX=10090 GN=Tubal3 PE=2 SV=2	8	4	86	1	446	50	5.58	189.01	99.1	95.2	101.2	109.6	92.5	102.4
Q9WUR9	Adenylate kinase 4, mitochondrial OS=Mus musculus OX=10090 GN=Ak4 PE=1 SV=1	39	9	19	9	223	25	7.53	61.02	99.4	95.7	102.4	94.6	107.3	100.5
Q91XL9	Oxysterol-binding protein-related protein 1 OS=Mus musculus OX=10090 GN=Osbpl1a PE=1 SV=2	12	12	24	11	950	107.7	6.44	73.44	101.8	97.8	99.2	100.5	103.5	97.2
Q64518	Sarcoplasmic/endoplasmic reticulum calcium ATPase 3 OS=Mus musculus OX=10090 GN=Atp2a3 PE=1 SV=4	9	10	30	1	999	109.5	5.66	74.77	96.8	89.5	113.2	104.5	88.7	107.4
Q8R2R9	AP-3 complex subunit mu-2 OS=Mus musculus OX=10090 GN=Ap3m2 PE=1 SV=1	28	11	21	8	418	46.9	7.56	60.75	100.3	100.5	99.3	101.8	99.1	99
Q9CQC6	Basic leucine zipper and W2 domain-containing protein 1 OS=Mus musculus OX=10090 GN=Bzw1 PE=1 SV=1	32	13	25	13	419	48	5.92	56.73	97.4	101.1	102	101.6	98.5	99.4
Q8BXR1	Probable cationic amino acid transporter OS=Mus musculus OX=10090 GN=Slc7a14 PE=1 SV=1	11	7	20	7	771	83.9	5.35	64.73	98.9	99	100.8	98.9	101.4	101
Q6PHS9	Voltage-dependent calcium channel subunit alpha-2/delta-2 OS=Mus musculus OX=10090 GN=Cacna2d2 PE=1 SV=1	12	16	19	14	1154	130.3	5.66	47.71	97.1	96.1	103.1	102.3	101.9	99.4
Q9QUR8	Semaphorin-7A OS=Mus musculus OX=10090 GN=Sema7a PE=1 SV=1	22	12	20	12	664	74.9	7.74	54.35	98	95.9	106.6	98.6	98.3	102.6
P52503	NADH dehydrogenase [ubiquinone] iron-sulfur protein 6, mitochondrial OS=Mus musculus OX=10090 GN=Ndufs6 PE=1 SV=2	65	8	22	8	116	13	8.65	92.99	102.9	99.2	98	98.9	100.1	100.9
Q80Y56	Rabenosyn-5 OS=Mus musculus OX=10090 GN=Rbsn PE=1 SV=1	14	13	14	13	783	88.4	5.3	35.36	98	99.7	101	102.4	97.1	101.8
P56391	Cytochrome c oxidase subunit 6B1 OS=Mus musculus OX=10090 GN=Cox6b1 PE=1 SV=2	71	8	29	8	86	10.1	8.72	83.08	103.7	101.5	96.7	100.9	101.5	95.6
P47753	F-actin-capping protein subunit alpha-1 OS=Mus musculus OX=10090 GN=Capza1 PE=1 SV=4	46	10	22	7	286	32.9	5.55	79.86	97.5	104.7	96.4	102.4	96.9	102.2
P58854	Gamma-tubulin complex component 3 OS=Mus musculus OX=10090 GN=Tubgcp3 PE=1 SV=2	16	12	15	12	905	103.4	8.32	43.21	100.4	97.6	103.5	100.6	99	98.8
Q80UW2	F-box only protein 2 OS=Mus musculus OX=10090 GN=Fbxo2 PE=1 SV=1	42	9	15	9	297	33.7	4.28	54.97	99	95.6	102.7	102.4	103.5	96.9
Q8K0D5	Elongation factor G, mitochondrial OS=Mus musculus OX=10090 GN=Gfm1 PE=1 SV=1	19	14	18	14	751	83.5	6.92	51.59	98.4	100.2	102.3	102.3	98.1	98.8
P36993	Protein phosphatase 1B OS=Mus musculus OX=10090 GN=Ppm1b PE=1 SV=1	29	9	14	7	390	42.8	5.19	43.22	101.8	100.2	101	100.2	94	102.8
Q6P8I4	PEST proteolytic signal-containing nuclear protein OS=Mus musculus OX=10090 GN=Pcnp PE=1 SV=1	55	10	25	10	178	19	7.49	64.89	97	101.2	103.2	100.3	95.7	102.6
P28659	CUGBP Elav-like family member 1 OS=Mus musculus OX=10090 GN=Celf1 PE=1 SV=2	24	13	36	8	486	52.1	8.46	90.37	93.6	104.3	100.9	101.5	98	101.7
Q9WVA3	Mitotic checkpoint protein BUB3 OS=Mus musculus OX=10090 GN=Bub3 PE=1 SV=2	30	10	12	10	326	36.9	6.84	37.93	98.3	102.9	100.8	101.5	95	101.5
Q8C570	mRNA export factor OS=Mus musculus OX=10090 GN=Rae1 PE=1 SV=1	28	10	20	10	368	40.9	7.83	59.63	96.8	98.4	99	101.2	99.8	104.8
Q3UV70	[Pyruvate dehydrogenase [acetyl-transferring]]-phosphatase 1, mitochondrial OS=Mus musculus OX=10090 GN=Pdp1 PE=1 SV=1	22	12	23	12	538	61.1	6.67	76.39	96.5	102.6	99.3	102.1	98.4	101.2
Q8CE50	Sorting nexin-30 OS=Mus musculus OX=10090 GN=Snx30 PE=1 SV=1	24	11	25	11	437	49.5	5.35	72.65	96.8	99.6	102.7	100	97.8	103
Q6P069	Sorcin OS=Mus musculus OX=10090 GN=Sri PE=1 SV=1	55	9	22	9	198	21.6	5.59	72.12	103.8	96.3	100.3	102.9	95	101.7
Q62189	U1 small nuclear ribonucleoprotein A OS=Mus musculus OX=10090 GN=Snrpa PE=1 SV=3	29	8	18	6	287	31.8	9.8	69.39	99.1	102.7	102.3	105.3	93.9	96.7
Q640R3	Hepatocyte cell adhesion molecule OS=Mus musculus OX=10090 GN=Hepacam PE=1 SV=2	36	11	29	11	418	46.3	9.42	86.1	101.5	97	98.5	97.8	104.5	100.7
Q91WC0	Actin-histidine N-methyltransferase OS=Mus musculus OX=10090 GN=Setd3 PE=1 SV=1	20	10	21	10	594	67.1	5.6	56.19	96.5	99.2	98.8	103.3	96.7	105.5
P24549	Aldehyde dehydrogenase 1A1 OS=Mus musculus OX=10090 GN=Aldh1a1 PE=1 SV=5	21	11	21	10	501	54.4	7.8	61.66	101.8	104.5	97.5	95.8	103.9	96.6
P46638	Ras-related protein Rab-11B OS=Mus musculus OX=10090 GN=Rab11b PE=1 SV=3	48	11	29	11	218	24.5	5.94	83.58	99.8	101.1	102.5	101.8	97.1	97.6
Q9D0L7	Armadillo repeat-containing protein 10 OS=Mus musculus OX=10090 GN=Armc10 PE=1 SV=1	29	7	17	7	306	33.3	7.99	53.04	99.1	101.8	99.4	100.5	99.6	99.5
Q99J31	Oligophrenin-1 OS=Mus musculus OX=10090 GN=Ophn1 PE=1 SV=1	20	13	16	13	802	91.9	7.96	39.72	96.9	97	103.7	97.3	101.8	103.4
P63242	Eukaryotic translation initiation factor 5A-1 OS=Mus musculus OX=10090 GN=Eif5a PE=1 SV=2	56	10	31	5	154	16.8	5.24	70.5	100	100.5	103.6	99.9	96.8	99.3
Q6PCP5	Mitochondrial fission factor OS=Mus musculus OX=10090 GN=Mff PE=1 SV=1	37	9	15	9	291	32.9	6.83	41.23	97.3	97.9	99.6	101.5	102.6	101.1
Q9R1C7	Pre-mRNA-processing factor 40 homolog A OS=Mus musculus OX=10090 GN=Prpf40a PE=1 SV=1	13	13	24	12	953	108.4	7.69	52.74	96.1	102.5	96.5	102.7	101.8	100.5
Q8BR63	Protein FAM177A1 OS=Mus musculus OX=10090 GN=Fam177a1 PE=1 SV=1	39	7	19	7	207	23.6	4.59	75.57	110.9	91.7	94.3	92.3	104.4	106.5
Q9D710	Thioredoxin-related transmembrane protein 2 OS=Mus musculus OX=10090 GN=Tmx2 PE=1 SV=1	36	11	27	11	295	33.9	8.75	77.15	98.5	100.4	104.4	99.1	97.4	100.2
Q8K4R4	Cytoplasmic phosphatidylinositol transfer protein 1 OS=Mus musculus OX=10090 GN=Pitpnc1 PE=1 SV=1	35	12	19	12	332	38.4	6.32	59.15	98.1	103.5	99.8	104.3	93.5	100.8
Q9DCT8	Cysteine-rich protein 2 OS=Mus musculus OX=10090 GN=Crip2 PE=1 SV=1	42	6	24	6	208	22.7	8.63	94.21	101.4	100.1	102.3	100.4	98.1	97.7
[truncated: 5,157 more rows]

## Sheet: Credible proteins
Credible proteins
Accession	Gene Name	Description	Coverage [%]	# Peptides	# PSMs	# Unique Peptides	# AAs	MW [kDa]	calc. pI	Score Sequest HT: Sequest HT	KO1	KO2	KO3	WT1	WT2	WT3
P16546	Sptan1	Spectrin alpha chain, non-erythrocytic 1 OS=Mus musculus OX=10090 GN=Sptan1 PE=1 SV=4	77	211	931	210	2472	284.4	5.33	3302.56	102.5	100.3	99.3	98.9	100.4	98.7
Q9JHU4	Dync1h1	Cytoplasmic dynein 1 heavy chain 1 OS=Mus musculus OX=10090 GN=Dync1h1 PE=1 SV=2	42	210	601	210	4644	531.7	6.42	1986.02	99.8	100.6	101.1	99.7	98.6	100.3
Q62261	Sptbn1	Spectrin beta chain, non-erythrocytic 1 OS=Mus musculus OX=10090 GN=Sptbn1 PE=1 SV=2	67	172	684	160	2363	274.1	5.58	2289.55	99.7	99.5	99	101.5	100.3	100
Q9QXS1	Plec	Plectin OS=Mus musculus OX=10090 GN=Plec PE=1 SV=3	44	208	441	207	4691	533.9	5.96	1396.07	102	96.5	97.9	98.1	106.2	99.3
P20357	Map2	Microtubule-associated protein 2 OS=Mus musculus OX=10090 GN=Map2 PE=1 SV=2	58	121	510	121	1828	199	4.91	1692.11	99.6	100.2	101.9	99.8	99.7	98.7
Q8C8R3	Ank2	Ankyrin-2 OS=Mus musculus OX=10090 GN=Ank2 PE=1 SV=2	46	157	430	144	3898	426	5.17	1495.97	98.7	101	99.6	101.6	97.1	102
Q9QYR6	Map1a	Microtubule-associated protein 1A OS=Mus musculus OX=10090 GN=Map1a PE=1 SV=2	48	128	411	126	2776	300	5	1381.32	101.7	99.2	98.3	97.2	103.5	100.2
P14873	Map1b	Microtubule-associated protein 1B OS=Mus musculus OX=10090 GN=Map1b PE=1 SV=2	48	111	417	109	2464	270.1	4.83	1341.54	99.1	101.3	99.6	98.9	100.2	100.9
O88737	Bsn	Protein bassoon OS=Mus musculus OX=10090 GN=Bsn PE=1 SV=4	41	121	336	116	3942	418.6	7.71	1030.24	102.5	98.3	100.3	98	100.9	100
Q9QYX7	Pclo	Protein piccolo OS=Mus musculus OX=10090 GN=Pclo PE=1 SV=4	29	132	291	129	5068	550.5	6.51	913.64	99	100.5	99.4	99.8	102	99.2
Q6PIC6	Atp1a3	Sodium/potassium-transporting ATPase subunit alpha-3 OS=Mus musculus OX=10090 GN=Atp1a3 PE=1 SV=1	56	69	661	44	1013	111.6	5.41	2318.96	101.5	100.1	97.9	100.7	102.3	97.5
Q68FD5	Cltc	Clathrin heavy chain 1 OS=Mus musculus OX=10090 GN=Cltc PE=1 SV=3	53	84	383	84	1675	191.4	5.69	1389.7	101.8	100	98.7	102.2	101.1	96.1
Q9QXZ0	Macf1	Microtubule-actin cross-linking factor 1 OS=Mus musculus OX=10090 GN=Macf1 PE=1 SV=2	21	147	254	142	7354	831.4	5.43	776.49	99.1	98.9	100.4	100.6	101.1	99.9
Q61879	Myh10	Myosin-10 OS=Mus musculus OX=10090 GN=Myh10 PE=1 SV=2	49	111	267	90	1976	228.9	5.54	880.07	100.3	101.3	100.1	98.7	98.9	100.7
Q6PIE5	Atp1a2	Sodium/potassium-transporting ATPase subunit alpha-2 OS=Mus musculus OX=10090 GN=Atp1a2 PE=1 SV=1	56	67	541	41	1020	112.1	5.55	1869.47	102.6	99.9	98.2	101.2	104.8	93.4
Q8VDD5	Myh9	Myosin-9 OS=Mus musculus OX=10090 GN=Myh9 PE=1 SV=4	45	101	248	80	1960	226.2	5.66	795.34	100.1	101.8	102.2	98.1	97.8	100
Q8BPN8	Dmxl2	DmX-like protein 2 OS=Mus musculus OX=10090 GN=Dmxl2 PE=1 SV=3	33	92	235	89	3032	338	6.42	782.1	100.2	99.8	100.5	100	100.7	98.8
Q8VDN2	Atp1a1	Sodium/potassium-transporting ATPase subunit alpha-1 OS=Mus musculus OX=10090 GN=Atp1a1 PE=1 SV=1	51	56	427	31	1023	112.9	5.45	1453.48	103.5	99.9	97.8	98.5	102.5	97.8
Q71LX4	Tln2	Talin-2 OS=Mus musculus OX=10090 GN=Tln2 PE=1 SV=3	41	89	195	71	2375	253.5	5.8	694.49	99.4	99	100.2	100.5	100.6	100.3
Q99104	Myo5a	Unconventional myosin-Va OS=Mus musculus OX=10090 GN=Myo5a PE=1 SV=2	43	96	230	83	1853	215.4	8.63	697.2	99.4	98.9	99.4	101.9	101.5	98.9
P19096	Fasn	Fatty acid synthase OS=Mus musculus OX=10090 GN=Fasn PE=1 SV=2	35	80	215	80	2504	272.3	6.58	727.24	96.9	100	100.4	99.9	99.4	103.4
P63017	Hspa8	Heat shock cognate 71 kDa protein OS=Mus musculus OX=10090 GN=Hspa8 PE=1 SV=1	72	51	341	35	646	70.8	5.52	1107.27	99.1	103.8	99.8	99.1	97.5	100.7
Q91ZX7	Lrp1	Prolow-density lipoprotein receptor-related protein 1 OS=Mus musculus OX=10090 GN=Lrp1 PE=1 SV=1	22	90	169	88	4545	504.4	5.36	488.61	97.5	102.1	101.4	100.5	96.2	102.3
G5E829	Atp2b1	Plasma membrane calcium-transporting ATPase 1 OS=Mus musculus OX=10090 GN=Atp2b1 PE=1 SV=1	41	60	258	37	1220	134.7	5.91	807.68	98.3	105.1	99	98.7	100.2	98.6
E9Q401	Ryr2	Ryanodine receptor 2 OS=Mus musculus OX=10090 GN=Ryr2 PE=1 SV=1	19	89	169	83	4966	564.5	6.09	502.82	103.4	99.5	98.7	96.9	103.2	98.3
P52480	Pkm	Pyruvate kinase PKM OS=Mus musculus OX=10090 GN=Pkm PE=1 SV=4	73	41	336	41	531	57.8	7.47	1180.57	104.8	97.8	98.1	95.6	106.2	97.6
Q7TSJ2	Map6	Microtubule-associated protein 6 OS=Mus musculus OX=10090 GN=Map6 PE=1 SV=2	78	61	247	61	906	96.4	9.5	809.07	103.2	95.3	100.1	102.2	103.1	96.1
P39053	Dnm1	Dynamin-1 OS=Mus musculus OX=10090 GN=Dnm1 PE=1 SV=2	65	66	306	47	867	97.7	7.74	927.26	102.3	99.7	98.4	98.5	101.4	99.7
P46460	Nsf	Vesicle-fusing ATPase OS=Mus musculus OX=10090 GN=Nsf PE=1 SV=2	49	54	319	53	744	82.6	6.95	943.2	103.9	101	98.4	97.4	99.9	99.4
Q9R0K7	Atp2b2	Plasma membrane calcium-transporting ATPase 2 OS=Mus musculus OX=10090 GN=Atp2b2 PE=1 SV=2	46	57	207	38	1198	132.5	5.96	634.32	99.2	102.1	98.2	103.2	100.2	97.1
Q91ZU6	Dst	Dystonin OS=Mus musculus OX=10090 GN=Dst PE=1 SV=2	14	100	139	93	7393	833.7	5.31	375.99	99.1	97.5	100.2	98.8	101.9	102.6
P11499	Hsp90ab1	Heat shock protein HSP 90-beta OS=Mus musculus OX=10090 GN=Hsp90ab1 PE=1 SV=3	63	51	268	32	724	83.2	5.03	882.41	94	103.6	103.5	98.3	100.8	99.9
Q3UNH4	Gprin1	G protein-regulated inducer of neurite outgrowth 1 OS=Mus musculus OX=10090 GN=Gprin1 PE=1 SV=2	65	70	200	70	932	95.4	7.93	572.32	100.9	100.6	101.6	101.6	96.8	98.5
Q80TJ1	Cadps	Calcium-dependent secretion activator 1 OS=Mus musculus OX=10090 GN=Cadps PE=1 SV=3	47	55	158	47	1355	153	5.74	497.89	103	99.4	96.8	97.9	106.1	96.8
Q61316	Hspa4	Heat shock 70 kDa protein 4 OS=Mus musculus OX=10090 GN=Hspa4 PE=1 SV=1	64	47	201	44	841	94.1	5.24	671.3	98.5	101.8	100.5	98.4	101.2	99.5
P12960	Cntn1	Contactin-1 OS=Mus musculus OX=10090 GN=Cntn1 PE=1 SV=1	52	47	216	47	1020	113.3	6.16	732.42	101.2	98.8	99.9	100.7	100.1	99.2
P17710	Hk1	Hexokinase-1 OS=Mus musculus OX=10090 GN=Hk1 PE=1 SV=3	50	52	251	48	974	108.2	6.8	815.3	102	99.8	99.5	99.1	102.1	97.4
Q7TMM9	Tubb2a	Tubulin beta-2A chain OS=Mus musculus OX=10090 GN=Tubb2a PE=1 SV=1	68	25	775	2	445	49.9	4.89	2005.96	96.3	101.6	99.1	101.1	99	102.9
P15508	Sptb	Spectrin beta chain, erythrocytic OS=Mus musculus OX=10090 GN=Sptb PE=1 SV=4	36	74	151	65	2128	245.1	5.33	476.23	101	99	96.3	97.5	106.7	99.5
Q6ZWR6	Syne1	Nesprin-1 OS=Mus musculus OX=10090 GN=Syne1 PE=1 SV=2	12	96	132	95	8799	1009.3	5.59	324.44	96.6	97.9	97	102	103.2	103.4
Q9CWF2	Tubb2b	Tubulin beta-2B chain OS=Mus musculus OX=10090 GN=Tubb2b PE=1 SV=1	68	25	770	2	445	49.9	4.89	1973.19	91.7	110	95.4	104.8	91.8	106.4
O08788	Dctn1	Dynactin subunit 1 OS=Mus musculus OX=10090 GN=Dctn1 PE=1 SV=3	48	51	139	51	1281	141.6	5.9	510.71	102.8	99.7	99.6	99.1	97.1	101.7
P13595	Ncam1	Neural cell adhesion molecule 1 OS=Mus musculus OX=10090 GN=Ncam1 PE=1 SV=3	43	50	247	50	1115	119.4	4.83	761.22	98	99.5	102.6	102.7	97.4	99.8
P60710	Actb	Actin, cytoplasmic 1 OS=Mus musculus OX=10090 GN=Actb PE=1 SV=1	68	31	692	10	375	41.7	5.48	2666.07	98.1	102.4	97.5	101.5	100.7	99.8
Q91XV3	Basp1	Brain acid soluble protein 1 OS=Mus musculus OX=10090 GN=Basp1 PE=1 SV=3	96	36	400	36	226	22.1	4.51	1413.15	99.3	99.5	100.3	99.1	100.5	101.2
Q01853	Vcp	Transitional endoplasmic reticulum ATPase OS=Mus musculus OX=10090 GN=Vcp PE=1 SV=4	66	50	201	50	806	89.3	5.26	675.09	98	101.8	100.2	99.5	98.5	102
Q9QWI6	Srcin1	SRC kinase signaling inhibitor 1 OS=Mus musculus OX=10090 GN=Srcin1 PE=1 SV=2	54	66	145	66	1250	134.8	9.32	473.87	100.9	98.4	99.1	101.5	101.6	98.4
P07901	Hsp90aa1	Heat shock protein HSP 90-alpha OS=Mus musculus OX=10090 GN=Hsp90aa1 PE=1 SV=4	51	44	265	27	733	84.7	5.01	828.9	97.9	101.6	101.5	98.6	101.2	99.2
Q7TPR4	Actn1	Alpha-actinin-1 OS=Mus musculus OX=10090 GN=Actn1 PE=1 SV=1	54	45	148	26	892	103	5.38	512.95	102.9	101.8	98.8	96.5	102.2	97.8
O55143	Atp2a2	Sarcoplasmic/endoplasmic reticulum calcium ATPase 2 OS=Mus musculus OX=10090 GN=Atp2a2 PE=1 SV=2	44	46	191	37	1044	114.8	5.34	643.14	100	103.1	101.6	99.8	97.4	98.1
P17182	Eno1	Alpha-enolase OS=Mus musculus OX=10090 GN=Eno1 PE=1 SV=3	79	35	273	29	434	47.1	6.8	980.63	103.4	99.5	98.4	97.2	102.8	98.7
P56480	Atp5f1b	ATP synthase subunit beta, mitochondrial OS=Mus musculus OX=10090 GN=Atp5f1b PE=1 SV=2	77	29	262	29	529	56.3	5.34	890.71	100	99.2	100.1	101.3	99.4	100.1
P70336	Rock2	Rho-associated protein kinase 2 OS=Mus musculus OX=10090 GN=Rock2 PE=1 SV=1	44	70	155	64	1388	160.5	5.99	486.7	100.4	99.8	98.7	98.7	101.7	100.7
O08553	Dpysl2	Dihydropyrimidinase-related protein 2 OS=Mus musculus OX=10090 GN=Dpysl2 PE=1 SV=2	70	31	370	26	572	62.2	6.38	1495.27	101.2	97.9	98.7	99.8	103	99.4
Q8CHC4	Synj1	Synaptojanin-1 OS=Mus musculus OX=10090 GN=Synj1 PE=1 SV=3	36	53	183	52	1574	172.5	6.89	671.25	101.5	97.4	98.7	98.6	103.9	99.9
F6SEU4	Syngap1	Ras/Rap GTPase-activating protein SynGAP OS=Mus musculus OX=10090 GN=Syngap1 PE=1 SV=2	46	58	159	52	1340	148.1	8.98	506.67	101.3	101.7	98	98.9	102.4	97.7
O08599	Stxbp1	Syntaxin-binding protein 1 OS=Mus musculus OX=10090 GN=Stxbp1 PE=1 SV=2	63	45	240	44	594	67.5	6.96	748.22	102.8	96.4	96.4	100.4	105.8	98.2
P57780	Actn4	Alpha-actinin-4 OS=Mus musculus OX=10090 GN=Actn4 PE=1 SV=1	50	45	139	30	912	104.9	5.41	452.43	100.9	100.7	100.1	98.7	100	99.6
Q9JMH9	Myo18a	Unconventional myosin-XVIIIa OS=Mus musculus OX=10090 GN=Myo18a PE=1 SV=2	32	67	151	67	2050	232.6	6.28	490.38	98.7	99.2	101.2	101.1	98.2	101.5
Q99KI0	Aco2	Aconitate hydratase, mitochondrial OS=Mus musculus OX=10090 GN=Aco2 PE=1 SV=1	56	43	227	43	780	85.4	7.93	745.76	102.5	99.3	98.5	98.1	103.5	98.1
P68372	Tubb4b	Tubulin beta-4B chain OS=Mus musculus OX=10090 GN=Tubb4b PE=1 SV=1	74	26	691	2	445	49.8	4.89	1673.38	98.5	101.9	96.9	101	101.1	100.6
O88935	Syn1	Synapsin-1 OS=Mus musculus OX=10090 GN=Syn1 PE=1 SV=2	51	28	302	26	706	74.1	9.8	1058.29	102.9	96.9	97.1	99.3	107.7	96.2
Q8CAQ8	Immt	MICOS complex subunit Mic60 OS=Mus musculus OX=10090 GN=Immt PE=1 SV=1	69	52	163	52	757	83.8	6.61	553.09	100.8	100.9	99.3	100.1	99.9	98.9
P50516	Atp6v1a	V-type proton ATPase catalytic subunit A OS=Mus musculus OX=10090 GN=Atp6v1a PE=1 SV=2	58	40	248	40	617	68.3	5.58	798.73	102.3	99.1	99.2	98.5	102.7	98.3
Q80YX1	Tnc	Tenascin OS=Mus musculus OX=10090 GN=Tnc PE=1 SV=1	33	56	142	56	2110	231.7	4.89	475.67	96	104.8	105	99.3	94.8	100.1
P68369	Tuba1a	Tubulin alpha-1A chain OS=Mus musculus OX=10090 GN=Tuba1a PE=1 SV=1	62	28	724	6	451	50.1	5.06	2942.82	93.5	101	99.4	102.5	103.9	99.8
Q8CI94	Pygb	Glycogen phosphorylase, brain form OS=Mus musculus OX=10090 GN=Pygb PE=1 SV=3	54	50	154	39	843	96.7	6.73	529.49	104.9	99.8	99.3	95.8	103.4	96.7
Q3UHJ0	Aak1	AP2-associated protein kinase 1 OS=Mus musculus OX=10090 GN=Aak1 PE=1 SV=2	60	39	129	38	959	103.3	6.7	458.53	101.1	97.7	99.5	99.8	100.7	101.3
P07724	Alb	Albumin OS=Mus musculus OX=10090 GN=Alb PE=1 SV=3	70	45	203	45	608	68.6	6.07	687.8	117.2	94.1	97	98.3	94.9	98.6
P23819	Gria2	Glutamate receptor 2 OS=Mus musculus OX=10090 GN=Gria2 PE=1 SV=3	45	44	136	37	883	98.6	7.39	458.19	100	105.3	101.1	96.5	98.3	98.8
P68368	Tuba4a	Tubulin alpha-4A chain OS=Mus musculus OX=10090 GN=Tuba4a PE=1 SV=1	61	29	699	8	448	49.9	5.06	2873.97	98.5	101.4	99.1	99.8	101.9	99.3
Q8BRT1	Clasp2	CLIP-associating protein 2 OS=Mus musculus OX=10090 GN=Clasp2 PE=1 SV=1	45	55	146	49	1286	140.7	8.63	480.1	97.5	99	101.7	100.6	99.9	101.2
Q03265	Atp5f1a	ATP synthase subunit alpha, mitochondrial OS=Mus musculus OX=10090 GN=Atp5f1a PE=1 SV=1	59	40	345	40	553	59.7	9.19	1133.12	101.7	101.8	98.2	100.5	99.8	98
P17427	Ap2a2	AP-2 complex subunit alpha-2 OS=Mus musculus OX=10090 GN=Ap2a2 PE=1 SV=2	45	47	201	28	938	104	6.93	578.87	100.7	99.7	98.9	98.7	103.7	98.3
P17426	Ap2a1	AP-2 complex subunit alpha-1 OS=Mus musculus OX=10090 GN=Ap2a1 PE=1 SV=1	49	54	220	35	977	107.6	7.03	610.96	102	100.3	98.5	101.1	102.4	95.7
Q6PB66	Lrpprc	Leucine-rich PPR motif-containing protein, mitochondrial OS=Mus musculus OX=10090 GN=Lrpprc PE=1 SV=2	40	59	126	59	1392	156.5	6.83	433.2	97.3	102.3	102.4	101.4	95.8	100.8
G5E8K5	Ank3	Ankyrin-3 OS=Mus musculus OX=10090 GN=Ank3 PE=1 SV=1	31	63	120	51	1961	213.9	6.7	381.02	103.6	96.9	97.5	96.6	101.9	103.5
Q80UG2	Plxna4	Plexin-A4 OS=Mus musculus OX=10090 GN=Plxna4 PE=1 SV=3	35	62	126	45	1893	212.4	6.83	409.01	98.7	101	100.7	100.1	98.8	100.8
Q02053	Uba1	Ubiquitin-like modifier-activating enzyme 1 OS=Mus musculus OX=10090 GN=Uba1 PE=1 SV=1	46	43	158	43	1058	117.7	5.66	557.86	100.3	101.1	98.8	100.3	101.1	98.3
P38647	Hspa9	Stress-70 protein, mitochondrial OS=Mus musculus OX=10090 GN=Hspa9 PE=1 SV=3	50	43	142	42	679	73.4	6.07	451.98	100.3	100.1	100.6	99.4	99.9	99.7
Q8BL66	Eea1	Early endosome antigen 1 OS=Mus musculus OX=10090 GN=Eea1 PE=1 SV=2	44	67	122	66	1411	160.8	5.77	391.38	98.6	98.5	101	101.2	99.7	101
Q64727	Vcl	Vinculin OS=Mus musculus OX=10090 GN=Vcl PE=1 SV=4	57	59	127	59	1066	116.6	6	388.88	100.9	100.9	102.4	101.4	96.8	97.6
Q9DBG3	Ap2b1	AP-2 complex subunit beta OS=Mus musculus OX=10090 GN=Ap2b1 PE=1 SV=1	41	43	167	21	937	104.5	5.38	564.08	101.6	100.2	99.6	102.1	100.3	96.2
P48722	Hspa4l	Heat shock 70 kDa protein 4L OS=Mus musculus OX=10090 GN=Hspa4l PE=1 SV=2	50	46	157	44	838	94.3	5.74	480.19	101.1	97.2	99.9	99.9	104.4	97.4
Q9EPN1	Nbea	Neurobeachin OS=Mus musculus OX=10090 GN=Nbea PE=1 SV=1	24	61	132	56	2936	326.5	6.2	444.46	98.3	102.7	100.3	100.9	98.1	99.6
P26039	Tln1	Talin-1 OS=Mus musculus OX=10090 GN=Tln1 PE=1 SV=2	27	64	121	46	2541	269.7	6.18	363.04	101.3	97.8	100.4	100	98.7	101.8
Q9WV92	Epb41l3	Band 4.1-like protein 3 OS=Mus musculus OX=10090 GN=Epb41l3 PE=1 SV=1	52	47	122	43	929	103.3	5.31	454.48	102.5	94.7	98.6	101.3	104.3	98.6
Q61699	Hsph1	Heat shock protein 105 kDa OS=Mus musculus OX=10090 GN=Hsph1 PE=1 SV=2	52	43	137	40	858	96.3	5.53	502.17	93.2	104.2	103.6	98.1	99.6	101.4
P16330	Cnp	2',3'-cyclic-nucleotide 3'-phosphodiesterase OS=Mus musculus OX=10090 GN=Cnp PE=1 SV=3	74	41	214	39	420	47.1	8.97	745.14	123.2	83.3	87.4	85.6	113.5	107
A2AGT5	Ckap5	Cytoskeleton-associated protein 5 OS=Mus musculus OX=10090 GN=Ckap5 PE=1 SV=1	30	60	112	60	2032	225.5	7.96	356.81	101	98.9	99	100.4	98.9	101.8
P09411	Pgk1	Phosphoglycerate kinase 1 OS=Mus musculus OX=10090 GN=Pgk1 PE=1 SV=4	82	36	176	36	417	44.5	7.9	606.53	104.2	100.1	97.3	98.8	100.6	99
P99024	Tubb5	Tubulin beta-5 chain OS=Mus musculus OX=10090 GN=Tubb5 PE=1 SV=1	64	23	707	3	444	49.6	4.89	1765.83	95.9	101.3	99.2	99.6	100.4	103.5
P58252	Eef2	Elongation factor 2 OS=Mus musculus OX=10090 GN=Eef2 PE=1 SV=2	49	46	196	45	858	95.3	6.83	569.66	96.4	104	102.9	100.5	96	100.2
P05064	Aldoa	Fructose-bisphosphate aldolase A OS=Mus musculus OX=10090 GN=Aldoa PE=1 SV=2	76	33	254	28	364	39.3	8.09	896.43	104.7	99.7	97.4	97.5	101.1	99.6
Q8BYI9	Tnr	Tenascin-R OS=Mus musculus OX=10090 GN=Tnr PE=1 SV=2	36	41	143	41	1358	149.5	4.94	536.92	105.9	95.7	97.7	95	107.6	98.2
Q91VD9	Ndufs1	NADH-ubiquinone oxidoreductase 75 kDa subunit, mitochondrial OS=Mus musculus OX=10090 GN=Ndufs1 PE=1 SV=2	59	38	162	38	727	79.7	5.72	535.25	101.8	99.2	97.4	100.9	101.7	99
Q64521	Gpd2	Glycerol-3-phosphate dehydrogenase, mitochondrial OS=Mus musculus OX=10090 GN=Gpd2 PE=1 SV=2	63	46	151	46	727	80.9	6.61	442.18	99.2	100.3	97.1	102.5	98.4	102.5
P16858	Gapdh	Glyceraldehyde-3-phosphate dehydrogenase OS=Mus musculus OX=10090 GN=Gapdh PE=1 SV=2	68	21	311	21	333	35.8	8.25	1082.2	104.7	100.9	96.4	98.3	101.4	98.3
P63038	Hspd1	60 kDa heat shock protein, mitochondrial OS=Mus musculus OX=10090 GN=Hspd1 PE=1 SV=1	76	41	172	41	573	60.9	6.18	615.82	98.9	100.4	98.9	99.2	102.5	100
Q61768	Kif5b	Kinesin-1 heavy chain OS=Mus musculus OX=10090 GN=Kif5b PE=1 SV=3	50	51	118	40	963	109.5	6.44	385.94	100.1	99.4	99.8	98.9	98.9	102.9
P60469	Ppfia3	Liprin-alpha-3 OS=Mus musculus OX=10090 GN=Ppfia3 PE=1 SV=2	45	57	116	52	1194	133.3	5.64	371.11	99	101.4	99.1	101	98.5	101
P08553	Nefm	Neurofilament medium polypeptide OS=Mus musculus OX=10090 GN=Nefm PE=1 SV=4	47	48	175	43	848	95.9	4.77	515.04	115.2	89.5	92.1	94.6	106.5	102.1
Q9Z0R4	Itsn1	Intersectin-1 OS=Mus musculus OX=10090 GN=Itsn1 PE=1 SV=2	32	56	115	52	1714	194.2	7.91	347.55	99.5	99.3	100.5	99.7	99.3	101.8
Q9D6F9	Tubb4a	Tubulin beta-4A chain OS=Mus musculus OX=10090 GN=Tubb4a PE=1 SV=3	74	24	570	6	444	49.6	4.88	1277.68	106.9	95.2	93.4	94.8	107.6	102.2
Q8CGC7	Eprs1	Bifunctional glutamate/proline--tRNA ligase OS=Mus musculus OX=10090 GN=Eprs1 PE=1 SV=4	39	59	129	56	1512	170	7.66	376.06	100.3	100.8	101.8	99.8	96.1	101.2
P28738	Kif5c	Kinesin heavy chain isoform 5C OS=Mus musculus OX=10090 GN=Kif5c PE=1 SV=3	49	50	136	34	956	109.2	6.19	428.01	98.2	99	99.1	102.4	96.9	104.5
Q9QXS6	Dbn1	Drebrin OS=Mus musculus OX=10090 GN=Dbn1 PE=1 SV=4	49	31	123	31	706	77.2	4.49	433.47	98.1	103.3	100.2	99.2	99.4	99.8
P11881	Itpr1	Inositol 1,4,5-trisphosphate receptor type 1 OS=Mus musculus OX=10090 GN=Itpr1 PE=1 SV=2	22	59	93	48	2749	313	6.04	287.19	96.8	100.3	100.2	96.8	106.4	99.4
Q64332	Syn2	Synapsin-2 OS=Mus musculus OX=10090 GN=Syn2 PE=1 SV=2	54	27	213	24	586	63.3	8.43	766.76	104	98.9	98.7	96.4	104.4	97.6
Q922J3	Clip1	CAP-Gly domain-containing linker protein 1 OS=Mus musculus OX=10090 GN=Clip1 PE=1 SV=1	39	53	99	46	1391	155.7	5.24	292.36	96.3	101.7	101.8	98.2	100.3	101.8
P20029	Hspa5	Endoplasmic reticulum chaperone BiP OS=Mus musculus OX=10090 GN=Hspa5 PE=1 SV=3	57	42	143	40	655	72.4	5.16	498.49	97.1	104.7	103.8	98.9	95	100.6
Q61598	Gdi2	Rab GDP dissociation inhibitor beta OS=Mus musculus OX=10090 GN=Gdi2 PE=1 SV=1	68	33	134	25	445	50.5	6.25	480.17	98.9	100.2	100.4	101.4	100.1	99
Q60597	Ogdh	2-oxoglutarate dehydrogenase, mitochondrial OS=Mus musculus OX=10090 GN=Ogdh PE=1 SV=3	40	38	108	38	1023	116.4	6.83	365.48	98.8	99.2	100.4	100.6	102.5	98.5
P58281	Opa1	Dynamin-like 120 kDa protein, mitochondrial OS=Mus musculus OX=10090 GN=Opa1 PE=1 SV=1	50	50	127	50	960	111.3	7.55	434.69	98.9	99.1	100.9	100.1	100.4	100.5
Q99PL5	Rrbp1	Ribosome-binding protein 1 OS=Mus musculus OX=10090 GN=Rrbp1 PE=1 SV=2	57	63	116	63	1605	172.8	9.33	290.25	94.2	102.6	101.3	104.2	97.2	100.4
P17156	Hspa2	Heat shock-related 70 kDa protein 2 OS=Mus musculus OX=10090 GN=Hspa2 PE=1 SV=2	57	43	163	26	633	69.6	5.67	489.6	104.9	100.4	99.7	94.2	101.4	99.5
P27546	Map4	Microtubule-associated protein 4 OS=Mus musculus OX=10090 GN=Map4 PE=1 SV=3	48	47	115	46	1125	117.4	4.98	321.47	99.9	104.6	98.8	97.3	94.6	104.7
P70398	Usp9x	Probable ubiquitin carboxyl-terminal hydrolase FAF-X OS=Mus musculus OX=10090 GN=Usp9x PE=1 SV=2	22	53	92	53	2559	290.5	5.87	312.09	96.9	99.4	102.2	99.7	100.3	101.5
Q4KMM3	Oxr1	Oxidation resistance protein 1 OS=Mus musculus OX=10090 GN=Oxr1 PE=1 SV=3	49	38	114	38	866	95.9	5.33	419.66	102.9	97.1	98.8	99.3	105.1	96.7
Q6PH08	Erc2	ERC protein 2 OS=Mus musculus OX=10090 GN=Erc2 PE=1 SV=2	49	61	135	45	957	110.6	7.03	364.14	101.9	101.1	101	96.3	100.4	99.3
D3YZU1	Shank1	SH3 and multiple ankyrin repeat domains protein 1 OS=Mus musculus OX=10090 GN=Shank1 PE=1 SV=1	27	49	114	47	2167	226.2	8.34	324.06	100.4	99.8	100.1	96.9	104.6	98.3
Q62188	Dpysl3	Dihydropyrimidinase-related protein 3 OS=Mus musculus OX=10090 GN=Dpysl3 PE=1 SV=1	59	26	136	21	570	61.9	6.49	532.92	91.8	104.4	102.7	104.8	93.5	102.7
A2AN08	Ubr4	E3 ubiquitin-protein ligase UBR4 OS=Mus musculus OX=10090 GN=Ubr4 PE=1 SV=1	13	64	93	64	5180	571.9	6.06	264.65	96.1	101	100.5	100.5	99.5	102.4
Q9Z1G4	Atp6v0a1	V-type proton ATPase 116 kDa subunit a1 OS=Mus musculus OX=10090 GN=Atp6v0a1 PE=1 SV=3	36	33	116	32	839	96.4	6.76	440.89	101.7	100.2	98.8	99.2	102.7	97.3
Q80Z38	Shank2	SH3 and multiple ankyrin repeat domains protein 2 OS=Mus musculus OX=10090 GN=Shank2 PE=1 SV=2	42	53	99	51	1476	158.9	7.18	352.46	99	100.9	98.9	100.1	101.2	100
Q61301	Ctnna2	Catenin alpha-2 OS=Mus musculus OX=10090 GN=Ctnna2 PE=1 SV=3	46	37	105	29	953	105.2	5.71	401.38	99.8	101.2	100	100.7	99	99.3
Q60864	Stip1	Stress-induced-phosphoprotein 1 OS=Mus musculus OX=10090 GN=Stip1 PE=1 SV=1	66	47	133	47	543	62.5	6.8	400.51	97.9	99.9	101.7	98.1	103.5	98.8
P60879	Snap25	Synaptosomal-associated protein 25 OS=Mus musculus OX=10090 GN=Snap25 PE=1 SV=1	84	23	214	22	206	23.3	4.77	766.08	98.9	102.2	99.9	98.3	97	103.6
Q8K1M6	Dnm1l	Dynamin-1-like protein OS=Mus musculus OX=10090 GN=Dnm1l PE=1 SV=2	59	43	146	43	742	82.6	7.05	483.67	99.2	99.6	101.5	101.7	99.8	98.2
Q9ERD7	Tubb3	Tubulin beta-3 chain OS=Mus musculus OX=10090 GN=Tubb3 PE=1 SV=1	72	24	545	10	450	50.4	4.93	1196.83	98.1	101.5	99.3	104.9	97.4	98.9
P17183	Eno2	Gamma-enolase OS=Mus musculus OX=10090 GN=Eno2 PE=1 SV=2	75	25	178	19	434	47.3	5.11	643.63	102.5	99.5	96.8	99.8	103.1	98.3
O35643	Ap1b1	AP-1 complex subunit beta-1 OS=Mus musculus OX=10090 GN=Ap1b1 PE=1 SV=2	40	39	136	17	943	103.9	5.17	438.18	102.8	98.6	97.3	98.7	104.6	98
A2CG49	Kalrn	Kalirin OS=Mus musculus OX=10090 GN=Kalrn PE=1 SV=1	21	62	100	52	2964	336.8	6.07	286.99	98.1	103.3	98.7	99.5	100	100.4
P47857	Pfkm	ATP-dependent 6-phosphofructokinase, muscle type OS=Mus musculus OX=10090 GN=Pfkm PE=1 SV=3	43	33	132	29	780	85.2	8	463.58	101.5	99.2	99.1	100.2	101.8	98.2
Q91XM9	Dlg2	Disks large homolog 2 OS=Mus musculus OX=10090 GN=Dlg2 PE=1 SV=2	43	38	106	32	852	94.8	6.24	390.04	100.9	99.2	99.8	99.1	103.3	97.7
Q8VEK3	Hnrnpu	Heterogeneous nuclear ribonucleoprotein U OS=Mus musculus OX=10090 GN=Hnrnpu PE=1 SV=1	51	46	132	46	800	87.9	6.24	354.5	99.6	105.1	100.5	102.3	92.7	99.8
Q9Z1B3	Plcb1	1-phosphatidylinositol 4,5-bisphosphate phosphodiesterase beta-1 OS=Mus musculus OX=10090 GN=Plcb1 PE=1 SV=2	33	48	121	48	1216	138.3	6.13	410.51	101.8	99	98.4	99	103.8	98.1
Q6Q477	Atp2b4	Plasma membrane calcium-transporting ATPase 4 OS=Mus musculus OX=10090 GN=Atp2b4 PE=1 SV=1	27	37	128	19	1205	133	6.13	399.69	98.8	92.8	102.4	106.7	107.6	91.8
P08249	Mdh2	Malate dehydrogenase, mitochondrial OS=Mus musculus OX=10090 GN=Mdh2 PE=1 SV=3	72	25	231	25	338	35.6	8.68	846.96	101.4	100.9	99.1	99.4	102.5	96.7
P97427	Crmp1	Dihydropyrimidinase-related protein 1 OS=Mus musculus OX=10090 GN=Crmp1 PE=1 SV=1	51	25	156	20	572	62.1	7.12	551.84	97.6	102.8	101.7	100.9	95.4	101.6
Q9ES97	Rtn3	Reticulon-3 OS=Mus musculus OX=10090 GN=Rtn3 PE=1 SV=2	46	40	113	39	964	103.8	4.92	383.28	100.6	100.5	100.3	99.8	98.4	100.4
E9Q3L2	Pi4ka	Phosphatidylinositol 4-kinase alpha OS=Mus musculus OX=10090 GN=Pi4ka PE=1 SV=2	23	45	86	45	2105	236.9	7.06	274.03	101.1	98.4	100.4	99.7	100.5	99.9
Q9QVP9	Ptk2b	Protein-tyrosine kinase 2-beta OS=Mus musculus OX=10090 GN=Ptk2b PE=1 SV=2	44	44	112	43	1009	115.7	6.35	360.17	99	102.5	100.2	96.7	98.8	102.8
P23116	Eif3a	Eukaryotic translation initiation factor 3 subunit A OS=Mus musculus OX=10090 GN=Eif3a PE=1 SV=5	39	61	116	61	1344	161.8	6.77	278.12	97.2	101.3	101.4	101.4	96.4	102.2
P05063	Aldoc	Fructose-bisphosphate aldolase C OS=Mus musculus OX=10090 GN=Aldoc PE=1 SV=4	76	29	172	24	363	39.4	7.12	656.44	100.2	98.9	100	101.4	102	97.5
P62259	Ywhae	14-3-3 protein epsilon OS=Mus musculus OX=10090 GN=Ywhae PE=1 SV=1	79	28	258	25	255	29.2	4.74	802.56	99.9	103.3	100.3	101.7	96.3	98.5
Q5SQX6	Cyfip2	Cytoplasmic FMR1-interacting protein 2 OS=Mus musculus OX=10090 GN=Cyfip2 PE=1 SV=2	35	44	128	28	1253	145.6	7.05	372.98	98.8	103.4	98.6	99.4	98.6	101.2
P63318	Prkcg	Protein kinase C gamma type OS=Mus musculus OX=10090 GN=Prkcg PE=1 SV=1	47	35	145	32	697	78.3	7.46	486.84	99	103.9	98.7	98.9	98.9	100.5
F6ZDS4	Tpr	Nucleoprotein TPR OS=Mus musculus OX=10090 GN=Tpr PE=1 SV=1	25	55	80	54	2431	273.8	5.03	235.53	99.2	99.3	101	101.3	99.6	99.7
P50396	Gdi1	Rab GDP dissociation inhibitor alpha OS=Mus musculus OX=10090 GN=Gdi1 PE=1 SV=3	51	26	197	18	447	50.5	5.08	689.23	100.2	100.1	99.2	100.4	98.9	101.2
P58871	Tnks1bp1	182 kDa tankyrase-1-binding protein OS=Mus musculus OX=10090 GN=Tnks1bp1 PE=1 SV=2	33	44	89	44	1720	181.7	4.88	285.42	99.3	99.6	100.7	96.4	101.4	102.5
Q6P9K8	Caskin1	Caskin-1 OS=Mus musculus OX=10090 GN=Caskin1 PE=1 SV=2	38	40	100	38	1431	150.4	9.17	346.85	99.6	97.8	100.3	101	101.6	99.6
Q9Z0H8	Clip2	CAP-Gly domain-containing linker protein 2 OS=Mus musculus OX=10090 GN=Clip2 PE=1 SV=2	44	47	104	39	1047	115.8	6.48	360.46	97.2	98.4	100.7	98.8	102.3	102.6
P26443	Glud1	Glutamate dehydrogenase 1, mitochondrial OS=Mus musculus OX=10090 GN=Glud1 PE=1 SV=1	51	30	188	30	558	61.3	8	644.81	104.8	98	99.4	99.9	99.5	98.4
P70206	Plxna1	Plexin-A1 OS=Mus musculus OX=10090 GN=Plxna1 PE=1 SV=1	27	47	90	34	1894	211	6.9	298.34	97.8	101.8	102.3	99.3	96.8	101.8
P63101	Ywhaz	14-3-3 protein zeta/delta OS=Mus musculus OX=10090 GN=Ywhaz PE=1 SV=1	80	27	309	18	245	27.8	4.79	988.03	99.3	102.3	97.6	103.7	99.2	97.9
P28660	Nckap1	Nck-associated protein 1 OS=Mus musculus OX=10090 GN=Nckap1 PE=1 SV=2	34	42	112	40	1128	128.7	6.62	332.6	98.8	103.1	98.9	98.8	100.3	100.2
Q8C0T5	Sipa1l1	Signal-induced proliferation-associated 1-like protein 1 OS=Mus musculus OX=10090 GN=Sipa1l1 PE=1 SV=2	31	46	85	44	1782	196.9	8.13	260.79	98.5	100.2	99.8	100	99.1	102.3
Q6R891	Ppp1r9b	Neurabin-2 OS=Mus musculus OX=10090 GN=Ppp1r9b PE=1 SV=1	42	33	100	33	817	89.5	4.92	373.96	98.8	101.3	101.6	98.1	99.2	101
P62814	Atp6v1b2	V-type proton ATPase subunit B, brain isoform OS=Mus musculus OX=10090 GN=Atp6v1b2 PE=1 SV=1	62	28	139	28	511	56.5	5.81	525.34	101.1	99.3	97.9	100	100.8	100.9
P42932	Cct8	T-complex protein 1 subunit theta OS=Mus musculus OX=10090 GN=Cct8 PE=1 SV=3	57	33	121	33	548	59.5	5.62	393.95	98.1	101.8	102.5	99.3	96.7	101.5
B0V2N1	Ptprs	Receptor-type tyrosine-protein phosphatase S OS=Mus musculus OX=10090 GN=Ptprs PE=1 SV=1	22	35	88	29	1907	211.8	7.23	338.35	96.9	100.8	100.6	99.1	99.9	102.7
P14094	Atp1b1	Sodium/potassium-transporting ATPase subunit beta-1 OS=Mus musculus OX=10090 GN=Atp1b1 PE=1 SV=1	51	25	179	25	304	35.2	8.65	573.06	101.6	100	97.4	99.9	103.3	97.7
Q8R0S2	Iqsec1	IQ motif and SEC7 domain-containing protein 1 OS=Mus musculus OX=10090 GN=Iqsec1 PE=1 SV=2	42	40	84	33	961	107.9	7.14	275.02	102.9	102.3	99	98	99.9	97.9
P28652	Camk2b	Calcium/calmodulin-dependent protein kinase type II subunit beta OS=Mus musculus OX=10090 GN=Camk2b PE=1 SV=2	54	25	162	17	542	60.4	7.28	541.23	97.5	105.2	93.5	102.3	98.2	103.3
P27773	Pdia3	Protein disulfide-isomerase A3 OS=Mus musculus OX=10090 GN=Pdia3 PE=1 SV=2	68	40	114	40	505	56.6	6.21	387.67	98.3	103.7	103.4	98.9	93.4	102.3
P06837	Gap43	Neuromodulin OS=Mus musculus OX=10090 GN=Gap43 PE=1 SV=1	86	26	251	25	227	23.6	4.73	770.87	95.4	99.6	103.3	104.4	94.5	102.9
O70318	Epb41l2	Band 4.1-like protein 2 OS=Mus musculus OX=10090 GN=Epb41l2 PE=1 SV=2	35	37	104	34	988	109.9	5.43	337.04	104.2	96.1	100.2	98.2	102.4	99.1
Q7TMY8	Huwe1	E3 ubiquitin-protein ligase HUWE1 OS=Mus musculus OX=10090 GN=Huwe1 PE=1 SV=5	13	54	103	54	4377	482.3	5.22	278.49	97.9	100.3	99.1	100.2	98.4	104.1
Q9WUA3	Pfkp	ATP-dependent 6-phosphofructokinase, platelet type OS=Mus musculus OX=10090 GN=Pfkp PE=1 SV=1	41	35	136	30	784	85.4	7.11	374.41	99.1	99.7	100	101.4	100	99.8
P06745	Gpi	Glucose-6-phosphate isomerase OS=Mus musculus OX=10090 GN=Gpi PE=1 SV=4	40	29	147	29	558	62.7	8.13	460.78	105.5	101.8	97.9	98.9	100	95.8
Q80TE7	Lrrc7	Leucine-rich repeat-containing protein 7 OS=Mus musculus OX=10090 GN=Lrrc7 PE=1 SV=2	35	45	96	43	1490	166.8	6.61	276.73	99.9	103.1	99.4	97	99.6	101.1
Q8BKX1	Baiap2	Brain-specific angiogenesis inhibitor 1-associated protein 2 OS=Mus musculus OX=10090 GN=Baiap2 PE=1 SV=2	73	37	110	37	535	59.2	9.04	351.71	100.4	103.3	99.7	97.5	100.3	98.7
P08551	Nefl	Neurofilament light polypeptide OS=Mus musculus OX=10090 GN=Nefl PE=1 SV=5	52	33	129	29	543	61.5	4.64	389.59	115	89.3	92.2	93.6	107.4	102.5
Q8R0Y6	Aldh1l1	Cytosolic 10-formyltetrahydrofolate dehydrogenase OS=Mus musculus OX=10090 GN=Aldh1l1 PE=1 SV=1	49	39	89	37	902	98.6	5.91	313.33	101.3	96.3	101.8	100.8	102	97.9
D3Z7P3	Gls	Glutaminase kidney isoform, mitochondrial OS=Mus musculus OX=10090 GN=Gls PE=1 SV=1	46	29	131	28	674	73.9	7.99	448.02	103.3	99.4	99.2	100.8	98.6	98.7
P14824	Anxa6	Annexin A6 OS=Mus musculus OX=10090 GN=Anxa6 PE=1 SV=3	60	42	91	40	673	75.8	5.5	293.43	99.5	101.9	99.8	99.4	101.1	98.3
Q9JME5	Ap3b2	AP-3 complex subunit beta-2 OS=Mus musculus OX=10090 GN=Ap3b2 PE=1 SV=2	39	41	95	34	1082	119.1	5.63	272.95	97.9	100.4	101	101.6	98.8	100.2
Q8BH59	Slc25a12	Calcium-binding mitochondrial carrier protein Aralar1 OS=Mus musculus OX=10090 GN=Slc25a12 PE=1 SV=1	50	31	102	27	677	74.5	8.25	360.61	101.8	99.2	99.2	97.3	107.2	95.3
P08113	Hsp90b1	Endoplasmin OS=Mus musculus OX=10090 GN=Hsp90b1 PE=1 SV=2	38	35	126	33	802	92.4	4.82	420.7	94.9	102.2	104.6	102.3	95	100.9
Q80U49	Cep170b	Centrosomal protein of 170 kDa protein B OS=Mus musculus OX=10090 GN=Cep170b PE=1 SV=2	34	51	91	50	1574	170.7	6.87	254.39	98.3	97.8	99.3	100.9	101.2	102.5
Q920I9	Wdr7	WD repeat-containing protein 7 OS=Mus musculus OX=10090 GN=Wdr7 PE=1 SV=3	30	40	112	40	1489	163.3	6.9	361.51	99.5	99.5	99.5	99.5	101.7	100.3
P70704	Atp8a1	Phospholipid-transporting ATPase IA OS=Mus musculus OX=10090 GN=Atp8a1 PE=1 SV=2	27	32	102	31	1164	131.3	6.84	362.31	101	100.1	98.3	97.4	103.7	99.5
Q810U3	Nfasc	Neurofascin OS=Mus musculus OX=10090 GN=Nfasc PE=1 SV=1	30	38	87	37	1240	137.9	6.19	310.32	105.9	97.6	97.7	96.9	104.3	97.6
Q99PV0	Prpf8	Pre-mRNA-processing-splicing factor 8 OS=Mus musculus OX=10090 GN=Prpf8 PE=1 SV=2	19	47	83	47	2335	273.4	8.84	239.62	96.9	100.8	102.4	101.6	97.8	100.4
P47708	Rph3a	Rabphilin-3A OS=Mus musculus OX=10090 GN=Rph3a PE=1 SV=2	55	38	88	36	681	75.4	8.27	295.83	102.3	104.1	96.3	99.2	99.6	98.6
O54988	Slk	STE20-like serine/threonine-protein kinase OS=Mus musculus OX=10090 GN=Slk PE=1 SV=2	40	44	96	43	1233	141.4	5.14	270.62	99.2	99.7	99.6	98.3	101.3	101.9
Q8K0U4	Hspa12a	Heat shock 70 kDa protein 12A OS=Mus musculus OX=10090 GN=Hspa12a PE=1 SV=1	42	28	116	26	675	74.8	6.77	392.19	108.2	97.5	98.7	97.6	100.5	97.5
P62737	Acta2	Actin, aortic smooth muscle OS=Mus musculus OX=10090 GN=Acta2 PE=1 SV=1	59	26	478	8	377	42	5.39	1487.02	101.2	100.5	98.1	98.8	100.6	100.8
Q6ZPE2	Sbf1	Myotubularin-related protein 5 OS=Mus musculus OX=10090 GN=Sbf1 PE=1 SV=2	28	43	89	40	1867	208.6	7.12	293.72	102.4	97.7	99	98.5	101.8	100.6
O08532	Cacna2d1	Voltage-dependent calcium channel subunit alpha-2/delta-1 OS=Mus musculus OX=10090 GN=Cacna2d1 PE=1 SV=1	31	34	95	33	1103	124.6	5.3	299.46	102.4	100.1	102.3	97.5	99.4	98.3
Q9Z2H5	Epb41l1	Band 4.1-like protein 1 OS=Mus musculus OX=10090 GN=Epb41l1 PE=1 SV=2	36	34	95	34	879	98.3	5.62	302.79	99.9	99.9	99.9	102.2	99.2	98.8
Q9CS84	Nrxn1	Neurexin-1 OS=Mus musculus OX=10090 GN=Nrxn1 PE=1 SV=3	27	38	91	32	1514	166.1	6.09	295.21	99	99.4	99.7	102.4	101.2	98.3
D3YVF0	Akap5	A-kinase anchor protein 5 OS=Mus musculus OX=10090 GN=Akap5 PE=1 SV=2	52	28	71	28	745	79.4	4.75	293.61	101.3	95.4	98.8	105.5	103.3	95.8
Q9WUB3	Pygm	Glycogen phosphorylase, muscle form OS=Mus musculus OX=10090 GN=Pygm PE=1 SV=3	46	43	88	33	842	97.2	7.11	301.65	104.9	92.5	108	95.6	107	92
Q04447	Ckb	Creatine kinase B-type OS=Mus musculus OX=10090 GN=Ckb PE=1 SV=1	81	26	234	23	381	42.7	5.67	742.64	102.9	98.2	98.9	100.7	103	96.4
Q9JI91	Actn2	Alpha-actinin-2 OS=Mus musculus OX=10090 GN=Actn2 PE=1 SV=2	46	38	75	26	894	103.8	5.45	261.35	103.2	94.2	98.1	96.3	106.4	101.8
Q11011	Npepps	Puromycin-sensitive aminopeptidase OS=Mus musculus OX=10090 GN=Npepps PE=1 SV=2	44	38	99	37	920	103.3	5.9	319.86	100.9	100.1	101.3	98.5	101	98.2
P10126	Eef1a1	Elongation factor 1-alpha 1 OS=Mus musculus OX=10090 GN=Eef1a1 PE=1 SV=3	56	28	167	14	462	50.1	9.01	501.05	100.2	105.1	101.1	98.1	95.7	99.8
P28663	Napb	Beta-soluble NSF attachment protein OS=Mus musculus OX=10090 GN=Napb PE=1 SV=2	69	21	115	17	298	33.5	5.47	418.77	101.3	98.9	99.8	98.9	103.1	98.1
Q62108	Dlg4	Disks large homolog 4 OS=Mus musculus OX=10090 GN=Dlg4 PE=1 SV=1	41	32	99	29	724	80.4	5.87	338.22	103	99.6	99.7	98	103.6	96.1
Q61644	Pacsin1	Protein kinase C and casein kinase substrate in neurons protein 1 OS=Mus musculus OX=10090 GN=Pacsin1 PE=1 SV=1	57	30	111	27	441	50.5	5.24	374.1	105.6	98.8	96.6	97.4	105.1	96.5
Q0KL02	Trio	Triple functional domain protein OS=Mus musculus OX=10090 GN=Trio PE=1 SV=3	15	45	80	36	3102	347.6	6.35	245.33	94.5	99.3	100.2	101.1	102.2	102.7
P40142	Tkt	Transketolase OS=Mus musculus OX=10090 GN=Tkt PE=1 SV=1	58	31	92	31	623	67.6	7.5	366.68	103.7	100.6	98.3	97.8	98.9	100.8
Q8QZT1	Acat1	Acetyl-CoA acetyltransferase, mitochondrial OS=Mus musculus OX=10090 GN=Acat1 PE=1 SV=1	49	23	120	23	424	44.8	8.51	427.69	97.5	101.6	99.8	100.3	99.3	101.4
Q3UHL1	Camkv	CaM kinase-like vesicle-associated protein OS=Mus musculus OX=10090 GN=Camkv PE=1 SV=2	59	28	101	28	512	54.8	5.54	383.97	100.2	101.3	98.3	99.5	102.4	98.4
Q9Z0E0	Ncdn	Neurochondrin OS=Mus musculus OX=10090 GN=Ncdn PE=1 SV=1	41	28	137	28	729	78.8	5.54	465.36	97.5	104	99.1	101.2	98.6	99.5
Q9EQF6	Dpysl5	Dihydropyrimidinase-related protein 5 OS=Mus musculus OX=10090 GN=Dpysl5 PE=1 SV=1	56	28	141	28	564	61.5	7.09	447.19	94.1	103.2	102.3	102.5	94.6	103.3
P20152	Vim	Vimentin OS=Mus musculus OX=10090 GN=Vim PE=1 SV=3	65	36	114	29	466	53.7	5.12	378.54	109.8	94.6	98.9	103.5	92	101.3
Q80U28	Madd	MAP kinase-activating death domain protein OS=Mus musculus OX=10090 GN=Madd PE=1 SV=2	25	37	70	37	1577	175.1	6.04	238.8	99.9	100.2	98.6	103.1	97.5	100.7
P68404	Prkcb	Protein kinase C beta type OS=Mus musculus OX=10090 GN=Prkcb PE=1 SV=4	46	33	114	20	671	76.7	7.01	393.55	102.1	101.4	99.3	95.8	102.1	99.1
Q7TMB8	Cyfip1	Cytoplasmic FMR1-interacting protein 1 OS=Mus musculus OX=10090 GN=Cyfip1 PE=1 SV=1	32	36	104	20	1253	145.1	6.9	301.42	98.1	101.1	100.9	100	101.2	98.7
Q8R081	Hnrnpl	Heterogeneous nuclear ribonucleoprotein L OS=Mus musculus OX=10090 GN=Hnrnpl PE=1 SV=2	53	26	112	26	586	63.9	8.1	351.89	98.2	102.9	101.2	102.5	95.6	99.7
O55131	Septin7	Septin-7 OS=Mus musculus OX=10090 GN=Septin7 PE=1 SV=1	50	29	128	27	436	50.5	8.57	413.36	105.2	98.7	96.9	99.9	101.9	97.4
Q810U4	Nrcam	Neuronal cell adhesion molecule OS=Mus musculus OX=10090 GN=Nrcam PE=1 SV=2	27	28	96	28	1256	138.4	5.91	328.67	99.8	100.1	99.1	99.2	99.8	102
Q99MI1	Erc1	ELKS/Rab6-interacting/CAST family member 1 OS=Mus musculus OX=10090 GN=Erc1 PE=1 SV=1	37	48	108	33	1120	128.3	5.87	301.83	92	102.1	103.3	102.2	96.4	103.9
Q6ZQ38	Cand1	Cullin-associated NEDD8-dissociated protein 1 OS=Mus musculus OX=10090 GN=Cand1 PE=1 SV=2	29	40	121	36	1230	136.2	5.78	375.21	102.4	100.4	99.1	100.4	99.9	97.7
Q2PFD7	Psd3	PH and SEC7 domain-containing protein 3 OS=Mus musculus OX=10090 GN=Psd3 PE=1 SV=2	32	39	113	39	1037	114.7	6.24	365.58	98	96.7	102.2	101.6	101.9	99.6
O35098	Dpysl4	Dihydropyrimidinase-related protein 4 OS=Mus musculus OX=10090 GN=Dpysl4 PE=1 SV=1	54	26	120	23	572	61.9	6.98	435.36	100.1	99	101.3	101.1	97.8	100.7
Q6URW6	Myh14	Myosin-14 OS=Mus musculus OX=10090 GN=Myh14 PE=1 SV=1	23	44	81	36	2000	228.4	5.55	251.26	99.9	99.3	100.9	98.3	100.7	101
P16054	Prkce	Protein kinase C epsilon type OS=Mus musculus OX=10090 GN=Prkce PE=1 SV=1	47	35	102	35	737	83.5	7.03	328.5	100.5	110.3	98.3	95.5	95.7	99.7
Q64514	Tpp2	Tripeptidyl-peptidase 2 OS=Mus musculus OX=10090 GN=Tpp2 PE=1 SV=3	33	40	87	40	1262	139.8	6.58	252.6	98.8	102.7	101.3	101.5	94.7	101.1
Q64487	Ptprd	Receptor-type tyrosine-protein phosphatase delta OS=Mus musculus OX=10090 GN=Ptprd PE=1 SV=3	23	36	68	28	1912	214.3	6.55	240.83	101.1	99.8	99.1	98.7	102.8	98.5
Q8BSS9	Ppfia2	Liprin-alpha-2 OS=Mus musculus OX=10090 GN=Ppfia2 PE=1 SV=2	33	46	68	41	1257	143.1	6.11	214.27	97.9	100.8	100.6	99.3	97.7	103.7
Q8K2B3	Sdha	Succinate dehydrogenase [ubiquinone] flavoprotein subunit, mitochondrial OS=Mus musculus OX=10090 GN=Sdha PE=1 SV=1	55	29	86	29	664	72.5	7.37	315.97	101.2	99.1	100.2	102.4	99.4	97.5
Q9QYB8	Add2	Beta-adducin OS=Mus musculus OX=10090 GN=Add2 PE=1 SV=4	43	28	98	27	725	80.6	6.21	297.65	104	100.2	97.5	98.8	100.3	99.2
Q60932	Vdac1	Voltage-dependent anion-selective channel protein 1 OS=Mus musculus OX=10090 GN=Vdac1 PE=1 SV=3	74	23	162	21	296	32.3	8.43	644.21	100.8	98.9	98	99.5	104.3	98.6
Q8BTM8	Flna	Filamin-A OS=Mus musculus OX=10090 GN=Flna PE=1 SV=5	19	41	60	38	2647	281	6.04	203.02	116.6	96.2	94.4	96.2	97.5	99.2
P11798	Camk2a	Calcium/calmodulin-dependent protein kinase type II subunit alpha OS=Mus musculus OX=10090 GN=Camk2a PE=1 SV=2	51	31	176	23	478	54.1	7.08	518.2	105.6	102.2	90.9	94	109.7	97.6
P59764	Dock4	Dedicator of cytokinesis protein 4 OS=Mus musculus OX=10090 GN=Dock4 PE=1 SV=1	24	47	77	45	1978	226.4	7.65	245.56	95.7	102.1	97.2	99.9	101.3	103.8
Q6ZPJ3	Ube2o	(E3-independent) E2 ubiquitin-conjugating enzyme UBE2O OS=Mus musculus OX=10090 GN=Ube2o PE=1 SV=3	29	33	91	33	1288	140.7	5.06	311.98	97.6	99.7	101	99.4	101.2	101
P80318	Cct3	T-complex protein 1 subunit gamma OS=Mus musculus OX=10090 GN=Cct3 PE=1 SV=1	53	32	89	32	545	60.6	6.7	310.77	98.1	102	101.6	99.8	97.4	101.1
E9Q912	Rap1gds1	Rap1 GTPase-GDP dissociation stimulator 1 OS=Mus musculus OX=10090 GN=Rap1gds1 PE=2 SV=1	51	25	89	25	607	66	5.35	332.77	96.2	102.3	103	101.9	95.5	101.1
O88342	Wdr1	WD repeat-containing protein 1 OS=Mus musculus OX=10090 GN=Wdr1 PE=1 SV=3	51	28	116	28	606	66.4	6.6	460.39	102	102.4	100.4	99	98.1	98.1
P03995	Gfap	Glial fibrillary acidic protein OS=Mus musculus OX=10090 GN=Gfap PE=1 SV=4	71	37	124	36	430	49.9	5.34	407.45	109.7	93.2	95.1	95.5	104.1	102.3
P46660	Ina	Alpha-internexin OS=Mus musculus OX=10090 GN=Ina PE=1 SV=3	68	39	140	34	501	55.3	5.4	445.64	108.7	92.9	95.3	95.5	105.2	102.5
O08638	Myh11	Myosin-11 OS=Mus musculus OX=10090 GN=Myh11 PE=1 SV=1	19	39	86	22	1972	226.9	5.45	259.33	127.8	93.5	88.8	91.5	106.3	92.1
Q61656	Ddx5	Probable ATP-dependent RNA helicase DDX5 OS=Mus musculus OX=10090 GN=Ddx5 PE=1 SV=2	47	34	86	24	614	69.2	8.92	264.06	97.5	102.9	101.3	102.6	93.9	101.8
P05202	Got2	Aspartate aminotransferase, mitochondrial OS=Mus musculus OX=10090 GN=Got2 PE=1 SV=1	60	31	143	31	430	47.4	9	422.99	103.7	100.4	96.2	98.9	104.5	96.3
Q99P72	Rtn4	Reticulon-4 OS=Mus musculus OX=10090 GN=Rtn4 PE=1 SV=2	27	32	95	32	1162	126.5	4.54	284.43	99.3	99.4	100	100.4	96.7	104.2
Q61553	Fscn1	Fascin OS=Mus musculus OX=10090 GN=Fscn1 PE=1 SV=4	66	31	85	31	493	54.5	6.89	300.68	96.3	99.6	101.9	100.2	99.8	102.1
Q8BFR5	Tufm	Elongation factor Tu, mitochondrial OS=Mus musculus OX=10090 GN=Tufm PE=1 SV=1	60	26	72	26	452	49.5	7.56	254.76	98.6	99.2	100.3	100.7	102.1	99.1
Q9Z0P4	Palm	Paralemmin-1 OS=Mus musculus OX=10090 GN=Palm PE=1 SV=1	57	27	98	25	383	41.6	4.84	336.58	104.6	98.3	100.5	100.3	96.9	99.5
Q9QXL2	Kif21a	Kinesin-like protein KIF21A OS=Mus musculus OX=10090 GN=Kif21a PE=1 SV=2	24	38	71	35	1672	186.4	6.27	221.42	99.2	98.9	100.2	99	100.7	102
P33173	Kif1a	Kinesin-like protein KIF1A OS=Mus musculus OX=10090 GN=Kif1a PE=1 SV=2	26	43	96	32	1695	191.6	6.2	282.11	96.2	98.3	98.9	101.2	101.6	103.8
P61264	Stx1b	Syntaxin-1B OS=Mus musculus OX=10090 GN=Stx1b PE=1 SV=1	55	22	113	18	288	33.2	5.38	380.12	104.1	97.1	97.8	100	105.4	95.6
Q05920	Pc	Pyruvate carboxylase, mitochondrial OS=Mus musculus OX=10090 GN=Pc PE=1 SV=1	32	37	86	37	1178	129.6	6.71	294.21	102.5	98.6	98.3	99.3	104.3	96.9
P10637	Mapt	Microtubule-associated protein tau OS=Mus musculus OX=10090 GN=Mapt PE=1 SV=3	39	29	152	28	733	76.2	6.79	473.15	99.6	101.3	99.5	100.2	96.3	103.2
Q7TQF7	Amph	Amphiphysin OS=Mus musculus OX=10090 GN=Amph PE=1 SV=1	40	30	82	28	686	75	4.63	286.65	101.4	102.1	101.3	97.5	99.3	98.3
Q812A2	Srgap3	SLIT-ROBO Rho GTPase-activating protein 3 OS=Mus musculus OX=10090 GN=Srgap3 PE=1 SV=1	32	30	69	26	1099	124.3	6.67	232.19	98.6	99.4	100.8	99	98.8	103.5
P12382	Pfkl	ATP-dependent 6-phosphofructokinase, liver type OS=Mus musculus OX=10090 GN=Pfkl PE=1 SV=4	36	29	95	22	780	85.3	7.17	315.12	98.5	100	97.6	97.2	104.4	102.3
Q9QYC0	Add1	Alpha-adducin OS=Mus musculus OX=10090 GN=Add1 PE=1 SV=2	42	27	93	26	735	80.6	5.9	296.54	101.6	100	98.5	99.6	100.1	100.1
P70175	Dlg3	Disks large homolog 3 OS=Mus musculus OX=10090 GN=Dlg3 PE=1 SV=1	40	34	86	32	849	93.4	6.79	262.65	99.8	102.8	100	97.7	99.5	100.2
Q9D0E1	Hnrnpm	Heterogeneous nuclear ribonucleoprotein M OS=Mus musculus OX=10090 GN=Hnrnpm PE=1 SV=3	52	38	87	38	729	77.6	8.63	236.41	98.3	102.7	99.4	102.8	95.1	101.5
Q9QZQ1	Afdn	Afadin OS=Mus musculus OX=10090 GN=Afdn PE=1 SV=3	27	43	60	43	1820	206.4	6.32	170.1	95.9	99.4	101.3	101.4	99.9	102
Q8BX70	Vps13c	Vacuolar protein sorting-associated protein 13C OS=Mus musculus OX=10090 GN=Vps13c PE=1 SV=2	13	43	63	42	3748	419.8	6.81	172.97	102.4	97.3	102.1	97.6	104	96.5
Q91V92	Acly	ATP-citrate synthase OS=Mus musculus OX=10090 GN=Acly PE=1 SV=1	33	37	91	37	1091	119.7	7.44	315.82	101	98.8	100.7	98.5	99.4	101.5
Q9ERU9	Ranbp2	E3 SUMO-protein ligase RanBP2 OS=Mus musculus OX=10090 GN=Ranbp2 PE=1 SV=2	17	50	70	49	3053	340.9	6.18	171.16	99.3	101.5	100	99.9	101.4	97.9
Q61595	Ktn1	Kinectin OS=Mus musculus OX=10090 GN=Ktn1 PE=1 SV=1	31	40	86	39	1327	152.5	5.86	263.8	94.7	100.5	100	101.1	99.3	104.3
Q62167	Ddx3x	ATP-dependent RNA helicase DDX3X OS=Mus musculus OX=10090 GN=Ddx3x PE=1 SV=3	54	34	80	11	662	73.1	7.18	234.43	96.8	98.6	99.4	103.9	97.5	103.8
Q99NE5	Rims1	Regulating synaptic membrane exocytosis protein 1 OS=Mus musculus OX=10090 GN=Rims1 PE=1 SV=2	28	37	73	36	1463	163.1	9.42	196.45	100.9	99.2	100.3	97.6	101.6	100.4
Q91V14	Slc12a5	Solute carrier family 12 member 5 OS=Mus musculus OX=10090 GN=Slc12a5 PE=1 SV=2	26	32	102	26	1138	126.2	6.74	273.15	98.8	100.9	98.9	103	101.5	96.8
Q3UHD9	Agap2	Arf-GAP with GTPase, ANK repeat and PH domain-containing protein 2 OS=Mus musculus OX=10090 GN=Agap2 PE=1 SV=1	35	38	78	38	1186	124.4	9.89	232.25	99.4	102.8	98.8	99.8	97.5	101.7
Q8BZ98	Dnm3	Dynamin-3 OS=Mus musculus OX=10090 GN=Dnm3 PE=1 SV=1	40	39	100	21	863	97.1	8.35	292.36	100.4	100	100.5	98.8	102.1	98.2
P23818	Gria1	Glutamate receptor 1 OS=Mus musculus OX=10090 GN=Gria1 PE=1 SV=1	32	30	96	24	907	101.5	7.69	291.16	96.2	109.5	102.1	95.1	96.6	100.5
Q80TV8	Clasp1	CLIP-associating protein 1 OS=Mus musculus OX=10090 GN=Clasp1 PE=1 SV=2	27	40	61	34	1535	169.1	9.03	186.04	97.9	100.2	101.2	99.1	99	102.6
P09405	Ncl	Nucleolin OS=Mus musculus OX=10090 GN=Ncl PE=1 SV=2	44	44	95	44	707	76.7	4.75	262.89	94	101	101.3	104.4	100.1	99.3
Q9JM52	Mink1	Misshapen-like kinase 1 OS=Mus musculus OX=10090 GN=Mink1 PE=1 SV=3	28	39	92	29	1308	147.2	7.44	271.78	98.9	101.6	98.8	97.3	100.8	102.6
Q8CJ40	Crocc	Rootletin OS=Mus musculus OX=10090 GN=Crocc PE=1 SV=2	23	45	59	44	2009	226.8	5.55	146.87	100.8	98.2	100.4	98.2	101.8	100.5
Q9Z1Q9	Vars1	Valine--tRNA ligase OS=Mus musculus OX=10090 GN=Vars1 PE=1 SV=1	27	31	80	31	1263	140.1	7.77	298.2	99.5	99.4	100.9	100.9	99.9	99.4
O35927	Ctnnd2	Catenin delta-2 OS=Mus musculus OX=10090 GN=Ctnnd2 PE=1 SV=1	32	36	89	32	1247	134.9	7.65	257.57	99.5	97.3	100.6	101.7	101.7	99.2
Q6P4T2	Snrnp200	U5 small nuclear ribonucleoprotein 200 kDa helicase OS=Mus musculus OX=10090 GN=Snrnp200 PE=1 SV=1	20	41	79	41	2136	244.4	6.06	238.92	98.5	101.9	101.8	100.8	96.8	100.2
Q9JJZ2	Tuba8	Tubulin alpha-8 chain OS=Mus musculus OX=10090 GN=Tuba8 PE=1 SV=1	41	17	275	3	449	50	5.1	959.08	102.8	92.2	97.2	94.3	109.3	104.2
P48678	Lmna	Prelamin-A/C OS=Mus musculus OX=10090 GN=Lmna PE=1 SV=2	56	39	77	38	665	74.2	6.98	247.79	102.8	96.9	99	102.6	101.9	96.9
Q501J6	Ddx17	Probable ATP-dependent RNA helicase DDX17 OS=Mus musculus OX=10090 GN=Ddx17 PE=1 SV=1	43	30	73	20	650	72.4	8.59	223.72	97.5	98.8	100.2	101.7	100.5	101.3
P84091	Ap2m1	AP-2 complex subunit mu OS=Mus musculus OX=10090 GN=Ap2m1 PE=1 SV=1	57	28	110	28	435	49.6	9.54	339.13	102.6	100.8	97.9	99.5	103	96.2
P14211	Calr	Calreticulin OS=Mus musculus OX=10090 GN=Calr PE=1 SV=1	69	29	111	29	416	48	4.49	319.41	94.7	104.5	105.6	100	94.6	100.6
Q3TXS7	Psmd1	26S proteasome non-ATPase regulatory subunit 1 OS=Mus musculus OX=10090 GN=Psmd1 PE=1 SV=1	38	31	60	31	953	105.7	5.39	214.23	99.5	100.2	101.9	99.8	98.1	100.6
Q4KUS2	Unc13a	Protein unc-13 homolog A OS=Mus musculus OX=10090 GN=Unc13a PE=1 SV=3	20	39	86	26	1712	193.7	5.25	254.62	99.5	99.9	99.6	97.9	102.1	101
O70133	Dhx9	ATP-dependent RNA helicase A OS=Mus musculus OX=10090 GN=Dhx9 PE=1 SV=2	25	35	90	35	1380	149.4	6.83	264.93	98.7	101.6	99.2	102.8	98.8	98.9
P55066	Ncan	Neurocan core protein OS=Mus musculus OX=10090 GN=Ncan PE=1 SV=1	25	31	75	30	1268	137.1	5.72	282.12	98	100.9	100.1	100	101.6	99.5
P46096	Syt1	Synaptotagmin-1 OS=Mus musculus OX=10090 GN=Syt1 PE=1 SV=1	54	26	125	16	421	47.4	8.53	392.08	103.8	100.1	97.1	99	101.6	98.4
Q80XI3	Eif4g3	Eukaryotic translation initiation factor 4 gamma 3 OS=Mus musculus OX=10090 GN=Eif4g3 PE=1 SV=2	25	38	65	34	1579	174.8	5.53	198.36	94.3	99.9	99	105.4	97.3	104.1
Q9Z218	Dpp6	Dipeptidyl aminopeptidase-like protein 6 OS=Mus musculus OX=10090 GN=Dpp6 PE=1 SV=1	34	32	87	30	804	91.2	6.68	280.36	101.9	99.5	100.2	99.8	100.7	97.9
P35564	Canx	Calnexin OS=Mus musculus OX=10090 GN=Canx PE=1 SV=1	47	31	80	30	591	67.2	4.64	231.64	98.3	101.4	103.7	100.2	95.5	101
Q5SWU9	Acaca	Acetyl-CoA carboxylase 1 OS=Mus musculus OX=10090 GN=Acaca PE=1 SV=1	18	40	67	40	2345	265.1	6.39	193	98	99.2	99.6	101.1	98.8	103.3
Q921I1	Tf	Serotransferrin OS=Mus musculus OX=10090 GN=Tf PE=1 SV=1	42	30	85	30	697	76.7	7.18	289.36	102.7	102	106.5	95.3	91.3	102.2
P63328	Ppp3ca	Serine/threonine-protein phosphatase 2B catalytic subunit alpha isoform OS=Mus musculus OX=10090 GN=Ppp3ca PE=1 SV=1	44	22	135	15	521	58.6	5.86	429.3	101.1	104.4	97.8	96.1	102.4	98.1
Q8BGQ7	Aars1	Alanine--tRNA ligase, cytoplasmic OS=Mus musculus OX=10090 GN=Aars1 PE=1 SV=1	38	34	73	34	968	106.8	5.67	222.14	101.1	99	99	98.4	103	99.5
P80315	Cct4	T-complex protein 1 subunit delta OS=Mus musculus OX=10090 GN=Cct4 PE=1 SV=3	55	28	103	27	539	58	8.02	341.31	99	102.2	100.8	99.8	98.3	100
P62631	Eef1a2	Elongation factor 1-alpha 2 OS=Mus musculus OX=10090 GN=Eef1a2 PE=1 SV=1	64	26	156	13	463	50.4	9.03	411.67	101.3	101.4	101.6	100.8	97.1	97.8
P48962	Slc25a4	ADP/ATP translocase 1 OS=Mus musculus OX=10090 GN=Slc25a4 PE=1 SV=4	60	27	202	18	298	32.9	9.72	530.42	99.4	100	98.7	100.9	106.5	94.5
P58771	Tpm1	Tropomyosin alpha-1 chain OS=Mus musculus OX=10090 GN=Tpm1 PE=1 SV=1	70	33	101	11	284	32.7	4.74	274	105.3	99.2	100	96.8	100.2	98.5
P68510	Ywhah	14-3-3 protein eta OS=Mus musculus OX=10090 GN=Ywhah PE=1 SV=2	67	19	179	14	246	28.2	4.89	517.76	99.7	103.6	102.3	100.3	93.3	100.9
P19246	Nefh	Neurofilament heavy polypeptide OS=Mus musculus OX=10090 GN=Nefh PE=1 SV=3	32	43	108	39	1090	116.9	5.81	266.14	110.5	89.3	94.3	98.5	104.3	103.1
Q62420	Sh3gl2	Endophilin-A1 OS=Mus musculus OX=10090 GN=Sh3gl2 PE=1 SV=2	57	24	127	16	352	39.9	5.39	374.03	104.8	96.2	98.3	95.9	106.8	98.1
Q8VDJ3	Hdlbp	Vigilin OS=Mus musculus OX=10090 GN=Hdlbp PE=1 SV=1	32	37	60	37	1268	141.7	6.87	179.6	92.8	100.9	99.9	104.8	98.1	103.5
O54774	Ap3d1	AP-3 complex subunit delta-1 OS=Mus musculus OX=10090 GN=Ap3d1 PE=1 SV=1	31	36	66	36	1199	135	7.37	216.26	96.1	100.1	101.3	103.6	98.4	100.5
P68254	Ywhaq	14-3-3 protein theta OS=Mus musculus OX=10090 GN=Ywhaq PE=1 SV=1	69	23	205	17	245	27.8	4.78	664.68	97.4	102	98.9	99.3	101.5	100.8
P14733	Lmnb1	Lamin-B1 OS=Mus musculus OX=10090 GN=Lmnb1 PE=1 SV=3	53	33	73	29	588	66.7	5.16	223.4	98.7	99.2	101.3	103.3	97	100.4
Q3TLH4	Prrc2c	Protein PRRC2C OS=Mus musculus OX=10090 GN=Prrc2c PE=1 SV=3	16	45	83	42	2846	310.7	9.1	161.69	96.5	101.9	102	100.4	97.3	101.9
Q9Z2I9	Sucla2	Succinate--CoA ligase [ADP-forming] subunit beta, mitochondrial OS=Mus musculus OX=10090 GN=Sucla2 PE=1 SV=2	48	25	109	25	463	50.1	7.01	371.38	101.8	100.7	99.4	96.5	106.5	95.2
E9PVA8	Gcn1	eIF-2-alpha kinase activator GCN1 OS=Mus musculus OX=10090 GN=Gcn1 PE=1 SV=1	18	45	69	43	2671	292.8	7.36	191.23	95.8	100.4	102.6	99.4	98.4	103.3
P62761	Vsnl1	Visinin-like protein 1 OS=Mus musculus OX=10090 GN=Vsnl1 PE=1 SV=2	80	19	107	14	191	22.1	5.15	333.81	100.5	96.5	98.8	105.7	99.4	99.1
Q76MZ3	Ppp2r1a	Serine/threonine-protein phosphatase 2A 65 kDa regulatory subunit A alpha isoform OS=Mus musculus OX=10090 GN=Ppp2r1a PE=1 SV=3	48	27	124	27	589	65.3	5.11	351.86	101	101.4	99	99.3	99.3	100
Q811D0	Dlg1	Disks large homolog 1 OS=Mus musculus OX=10090 GN=Dlg1 PE=1 SV=1	34	34	81	25	905	100.1	5.8	253.24	102.7	96.2	100.4	98.7	103.5	98.4
Q8K0T0	Rtn1	Reticulon-1 OS=Mus musculus OX=10090 GN=Rtn1 PE=1 SV=1	38	22	77	21	780	83.5	4.58	288.4	99.6	98.5	100.4	101.6	102.4	97.5
P42859	Htt	Huntingtin OS=Mus musculus OX=10090 GN=Htt PE=1 SV=2	13	40	78	40	3119	344.5	6.29	225.29	100	100.3	99.3	100.6	100.1	99.7
P26040	Ezr	Ezrin OS=Mus musculus OX=10090 GN=Ezr PE=1 SV=3	52	39	71	26	586	69.4	6.1	192.72	100.3	105.6	103.6	98.2	94.8	97.6
P21107	Tpm3	Tropomyosin alpha-3 chain OS=Mus musculus OX=10090 GN=Tpm3 PE=1 SV=3	65	31	112	12	285	33	4.72	323.56	102.3	100.9	96.6	96.8	99.6	103.9
O35551	Rabep1	Rab GTPase-binding effector protein 1 OS=Mus musculus OX=10090 GN=Rabep1 PE=1 SV=2	44	39	68	39	862	99.5	5.01	198.63	98.3	98.7	100.8	98.9	102	101.3
Q91W50	Csde1	Cold shock domain-containing protein E1 OS=Mus musculus OX=10090 GN=Csde1 PE=1 SV=1	42	35	70	35	798	88.7	6.37	214.59	96.8	100.9	100.9	101.5	98.1	101.8
Q80SW1	Ahcyl1	S-adenosylhomocysteine hydrolase-like protein 1 OS=Mus musculus OX=10090 GN=Ahcyl1 PE=1 SV=1	43	29	88	12	530	58.9	6.89	271.66	101.8	99.6	101	98.9	103.7	95
Q6NZJ6	Eif4g1	Eukaryotic translation initiation factor 4 gamma 1 OS=Mus musculus OX=10090 GN=Eif4g1 PE=1 SV=1	23	38	65	34	1600	176	5.4	190.93	94.5	101.6	101.7	101.7	98.2	102.4
Q5SSL4	Abr	Active breakpoint cluster region-related protein OS=Mus musculus OX=10090 GN=Abr PE=1 SV=1	37	34	69	29	859	97.6	6.58	204.53	97.8	101.3	99	100.6	102.6	98.6
Q8BIJ6	Iars2	Isoleucine--tRNA ligase, mitochondrial OS=Mus musculus OX=10090 GN=Iars2 PE=1 SV=1	37	31	77	31	1012	112.7	6.81	228.69	99.5	99	98.4	99.6	106.1	97.4
Q02248	Ctnnb1	Catenin beta-1 OS=Mus musculus OX=10090 GN=Ctnnb1 PE=1 SV=1	39	27	86	23	781	85.4	5.86	268.8	99.2	102	100.6	102.2	98.9	97.1
P43006	Slc1a2	Excitatory amino acid transporter 2 OS=Mus musculus OX=10090 GN=Slc1a2 PE=1 SV=1	34	21	137	21	572	62	6.68	396.8	99.2	100.4	96.6	105.3	103.2	95.2
Q3U1J4	Ddb1	DNA damage-binding protein 1 OS=Mus musculus OX=10090 GN=Ddb1 PE=1 SV=2	33	36	65	36	1140	126.8	5.26	195.71	97.8	99.4	100.2	102.9	100.7	98.9
Q9CWZ7	Napg	Gamma-soluble NSF attachment protein OS=Mus musculus OX=10090 GN=Napg PE=1 SV=1	62	19	86	19	312	34.7	5.41	284.26	103	99.5	98	96.4	102.4	100.7
P28740	Kif2a	Kinesin-like protein KIF2A OS=Mus musculus OX=10090 GN=Kif2a PE=1 SV=2	39	29	91	29	705	79.7	6.73	283.03	99.4	99.6	99.8	100.6	99.4	101.2
Q8BYR5	Cadps2	Calcium-dependent secretion activator 2 OS=Mus musculus OX=10090 GN=Cadps2 PE=1 SV=2	26	31	54	23	1297	147.7	6.14	183.22	96.6	101	98.8	99	103.4	101.2
P15105	Glul	Glutamine synthetase OS=Mus musculus OX=10090 GN=Glul PE=1 SV=6	54	21	163	21	373	42.1	7.08	508.37	103.7	99.7	98.6	98.8	101.7	97.4
Q60875	Arhgef2	Rho guanine nucleotide exchange factor 2 OS=Mus musculus OX=10090 GN=Arhgef2 PE=1 SV=4	39	39	83	39	985	111.9	7.25	253.3	96.1	104	99.8	99.8	97.8	102.5
P39054	Dnm2	Dynamin-2 OS=Mus musculus OX=10090 GN=Dnm2 PE=1 SV=2	32	34	119	13	870	98.1	7.43	308.98	101.7	100.4	97.7	98.1	99.9	102.2
Q4ACU6	Shank3	SH3 and multiple ankyrin repeat domains protein 3 OS=Mus musculus OX=10090 GN=Shank3 PE=1 SV=3	26	39	75	37	1730	185.3	8.88	196.06	100.8	99.3	99.4	97.8	102.3	100.5
P80314	Cct2	T-complex protein 1 subunit beta OS=Mus musculus OX=10090 GN=Cct2 PE=1 SV=4	49	25	75	25	535	57.4	6.4	274.51	99.7	101.1	101.4	98.6	97.1	102
P61922	Abat	4-aminobutyrate aminotransferase, mitochondrial OS=Mus musculus OX=10090 GN=Abat PE=1 SV=1	53	20	61	20	500	56.4	8.09	247.91	102.5	94.1	100.6	98.2	103.2	101.3
Q9DBJ1	Pgam1	Phosphoglycerate mutase 1 OS=Mus musculus OX=10090 GN=Pgam1 PE=1 SV=3	62	15	123	11	254	28.8	7.18	432.84	101.8	98.4	99.7	99	100.8	100.2
Q99JF8	Psip1	PC4 and SFRS1-interacting protein OS=Mus musculus OX=10090 GN=Psip1 PE=1 SV=1	45	29	79	28	528	59.7	9.13	214.87	95.8	100.5	100.5	102.1	102.7	98.4
B9EJA2	Cttnbp2	Cortactin-binding protein 2 OS=Mus musculus OX=10090 GN=Cttnbp2 PE=1 SV=2	19	33	70	33	1648	178.7	8.19	216.78	98.9	100.7	100.7	101.9	97.7	100.1
Q00PI9	Hnrnpul2	Heterogeneous nuclear ribonucleoprotein U-like protein 2 OS=Mus musculus OX=10090 GN=Hnrnpul2 PE=1 SV=2	41	33	78	33	745	84.9	4.89	217.65	98.6	100	99.2	102.4	100.7	99.2
Q3U0V1	Khsrp	Far upstream element-binding protein 2 OS=Mus musculus OX=10090 GN=Khsrp PE=1 SV=2	40	30	83	28	748	76.7	7.33	274.91	99.9	102.3	99.9	100.9	96.9	100.1
Q9CYT6	Cap2	Adenylyl cyclase-associated protein 2 OS=Mus musculus OX=10090 GN=Cap2 PE=1 SV=1	46	22	95	21	476	52.8	6.43	338.69	101.1	99.6	94.8	101.6	101.7	101.3
Q922S4	Pde2a	cGMP-dependent 3',5'-cyclic phosphodiesterase OS=Mus musculus OX=10090 GN=Pde2a PE=1 SV=4	35	29	81	29	939	105.6	5.41	254.42	98.3	98.6	101.6	101.2	103.4	96.8
Q8VDM4	Psmd2	26S proteasome non-ATPase regulatory subunit 2 OS=Mus musculus OX=10090 GN=Psmd2 PE=1 SV=1	34	30	75	30	908	100.1	5.17	235.18	98.6	101.5	100.9	100.8	97.2	101.1
Q3UQ44	Iqgap2	Ras GTPase-activating-like protein IQGAP2 OS=Mus musculus OX=10090 GN=Iqgap2 PE=1 SV=2	23	38	75	35	1575	180.4	5.64	220.94	90.7	106	99	96.7	99.7	108
O70161	Pip5k1c	Phosphatidylinositol 4-phosphate 5-kinase type-1 gamma OS=Mus musculus OX=10090 GN=Pip5k1c PE=1 SV=2	36	22	79	19	661	72.4	5.59	285.09	100.9	101.3	98.9	99.6	102.2	97.2
Q9DB77	Uqcrc2	Cytochrome b-c1 complex subunit 2, mitochondrial OS=Mus musculus OX=10090 GN=Uqcrc2 PE=1 SV=1	49	21	120	21	453	48.2	9.25	479.6	102.1	99	99.8	99.9	102.5	96.8
Q62417	Sorbs1	Sorbin and SH3 domain-containing protein 1 OS=Mus musculus OX=10090 GN=Sorbs1 PE=1 SV=2	29	35	71	34	1290	143	8.25	203.16	99.9	98.5	101.2	102.2	98.4	99.9
Q3TDD9	Ppp1r21	Protein phosphatase 1 regulatory subunit 21 OS=Mus musculus OX=10090 GN=Ppp1r21 PE=1 SV=2	43	36	62	35	780	88.3	6.9	203.41	97.8	99.5	100.2	101.5	96.8	104.1
P35486	Pdha1	Pyruvate dehydrogenase E1 component subunit alpha, somatic form, mitochondrial OS=Mus musculus OX=10090 GN=Pdha1 PE=1 SV=1	57	26	96	26	390	43.2	8.19	280.33	101.5	100.5	98.6	99.3	101.9	98.2
Q5F2E8	Taok1	Serine/threonine-protein kinase TAO1 OS=Mus musculus OX=10090 GN=Taok1 PE=1 SV=1	33	33	61	26	1001	116	7.55	202.1	96.3	100.9	100.9	98.4	98.3	105.1
P40124	Cap1	Adenylyl cyclase-associated protein 1 OS=Mus musculus OX=10090 GN=Cap1 PE=1 SV=4	52	22	61	21	474	51.5	7.52	229.73	101.7	103.4	95.9	97.8	100.1	101.1
P08003	Pdia4	Protein disulfide-isomerase A4 OS=Mus musculus OX=10090 GN=Pdia4 PE=1 SV=3	38	26	67	26	638	71.9	5.31	231.37	94.7	103	105.6	98	95.8	102.9
Q5SNZ0	Ccdc88a	Girdin OS=Mus musculus OX=10090 GN=Ccdc88a PE=1 SV=2	22	43	57	43	1873	215.8	6.24	156.53	96.5	103	102.1	101	95.3	102.1
Q8CIE6	Copa	Coatomer subunit alpha OS=Mus musculus OX=10090 GN=Copa PE=1 SV=2	30	34	61	34	1224	138.3	7.65	180.42	96.2	101.5	103.7	101.2	95.9	101.5
O88844	Idh1	Isocitrate dehydrogenase [NADP] cytoplasmic OS=Mus musculus OX=10090 GN=Idh1 PE=1 SV=2	56	29	72	28	414	46.6	7.17	204.96	97.7	102.1	102.7	99.9	91.5	106
Q8C1B7	Septin11	Septin-11 OS=Mus musculus OX=10090 GN=Septin11 PE=1 SV=4	44	26	98	10	431	49.7	6.68	315.5	102.6	96.9	98.3	101.8	103.1	97.4
Q9EQ20	Aldh6a1	Methylmalonate-semialdehyde dehydrogenase [acylating], mitochondrial OS=Mus musculus OX=10090 GN=Aldh6a1 PE=1 SV=1	47	24	76	24	535	57.9	8.07	261.86	102.3	99	102.2	99.9	102	94.6
Q8BVE3	Atp6v1h	V-type proton ATPase subunit H OS=Mus musculus OX=10090 GN=Atp6v1h PE=1 SV=1	43	18	64	18	483	55.8	6.61	233.63	102.1	100.3	98.3	98.2	102.7	98.4
Q8CGK3	Lonp1	Lon protease homolog, mitochondrial OS=Mus musculus OX=10090 GN=Lonp1 PE=1 SV=2	31	29	64	29	949	105.8	6.57	209.15	97.2	98.9	98.3	98.5	106.6	100.5
Q6P9K9	Nrxn3	Neurexin-3 OS=Mus musculus OX=10090 GN=Nrxn3 PE=1 SV=2	19	28	70	21	1571	173.3	6.14	246.17	97.7	100.9	100.9	100.1	98.8	101.6
Q9JLM8	Dclk1	Serine/threonine-protein kinase DCLK1 OS=Mus musculus OX=10090 GN=Dclk1 PE=1 SV=1	40	27	69	24	756	84.1	8.87	251.43	95.8	105.1	103.4	102.5	90.6	102.6
Q9WTQ5	Akap12	A-kinase anchor protein 12 OS=Mus musculus OX=10090 GN=Akap12 PE=1 SV=1	25	29	51	29	1684	180.6	4.44	154.01	95.9	95.3	100.7	104.3	99.3	104.6
Q9R1T4	Septin6	Septin-6 OS=Mus musculus OX=10090 GN=Septin6 PE=1 SV=4	47	24	74	10	434	49.6	6.43	225.97	105.2	100.1	97.4	101.1	99.6	96.5
Q80YA9	Cnksr2	Connector enhancer of kinase suppressor of ras 2 OS=Mus musculus OX=10090 GN=Cnksr2 PE=1 SV=1	30	29	74	29	1032	117.3	6.79	240.98	95.9	101.1	97.8	102.3	100.7	102.2
Q8K310	Matr3	Matrin-3 OS=Mus musculus OX=10090 GN=Matr3 PE=1 SV=1	34	32	87	32	846	94.6	6.25	224.94	98.4	103.5	100.4	103.3	95.4	98.9
P61982	Ywhag	14-3-3 protein gamma OS=Mus musculus OX=10090 GN=Ywhag PE=1 SV=2	65	19	244	12	247	28.3	4.89	651.73	100.5	102.1	99.4	99.6	99.3	99.1
Q91VR5	Ddx1	ATP-dependent RNA helicase DDX1 OS=Mus musculus OX=10090 GN=Ddx1 PE=1 SV=1	43	28	70	28	740	82.4	7.21	228.43	99.9	101.7	100	100.1	99.9	98.4
Q9JLV5	Cul3	Cullin-3 OS=Mus musculus OX=10090 GN=Cul3 PE=1 SV=1	38	31	62	30	768	88.9	8.46	187.32	100.4	99.4	100.4	98.1	102.5	99.2
Q91Z67	Srgap2	SLIT-ROBO Rho GTPase-activating protein 2 OS=Mus musculus OX=10090 GN=Srgap2 PE=1 SV=2	34	33	59	30	1071	120.7	6.64	175.88	95.6	100.6	101.3	101.5	97.5	103.5
P18872	Gnao1	Guanine nucleotide-binding protein G(o) subunit alpha OS=Mus musculus OX=10090 GN=Gnao1 PE=1 SV=3	41	16	124	14	354	40.1	5.53	364.32	103.6	99.3	99.2	99.7	100.4	97.8
Q922F4	Tubb6	Tubulin beta-6 chain OS=Mus musculus OX=10090 GN=Tubb6 PE=1 SV=1	32	13	433	1	447	50.1	4.89	825.82	73.2	103.2	117.1	110.5	95.8	100.1
Q3UVX5	Grm5	Metabotropic glutamate receptor 5 OS=Mus musculus OX=10090 GN=Grm5 PE=1 SV=2	31	35	60	32	1203	131.8	7.84	181.86	98.2	101.9	101	98.3	100.9	99.7
Q9Z268	Rasal1	RasGAP-activating-like protein 1 OS=Mus musculus OX=10090 GN=Rasal1 PE=1 SV=2	38	33	71	33	799	89.3	6.37	225.23	99.1	97.5	100.5	101.6	101.2	100.1
Q8CHG7	Rapgef2	Rap guanine nucleotide exchange factor 2 OS=Mus musculus OX=10090 GN=Rapgef2 PE=1 SV=2	26	30	69	30	1496	166.3	6.61	240.74	99.6	100.4	102.8	97.3	98.3	101.5
P97807	Fh	Fumarate hydratase, mitochondrial OS=Mus musculus OX=10090 GN=Fh PE=1 SV=3	49	21	79	21	507	54.3	9.04	253.99	100.9	99.6	99.5	98.8	104.2	97
Q9DBR7	Ppp1r12a	Protein phosphatase 1 regulatory subunit 12A OS=Mus musculus OX=10090 GN=Ppp1r12a PE=1 SV=2	34	35	61	34	1029	114.9	5.49	147.92	101	99.7	101	99.7	97.9	100.7
Q9D6R2	Idh3a	Isocitrate dehydrogenase [NAD] subunit alpha, mitochondrial OS=Mus musculus OX=10090 GN=Idh3a PE=1 SV=1	53	22	102	22	366	39.6	6.73	278.13	101.9	101.6	97.4	100.3	101.4	97.4
P16125	Ldhb	L-lactate dehydrogenase B chain OS=Mus musculus OX=10090 GN=Ldhb PE=1 SV=2	47	19	102	18	334	36.5	6.05	336.37	103.2	98.2	100	100.9	103	94.7
Q9R111	Gda	Guanine deaminase OS=Mus musculus OX=10090 GN=Gda PE=1 SV=1	42	22	75	22	454	51	5.53	238.04	104.4	97.1	100.4	97.9	102.9	97.3
Q03137	Epha4	Ephrin type-A receptor 4 OS=Mus musculus OX=10090 GN=Epha4 PE=1 SV=2	36	33	63	26	986	109.7	6.51	183.52	94.1	106.6	100.5	100.2	95.1	103.5
Q3UHK6	Tenm4	Teneurin-4 OS=Mus musculus OX=10090 GN=Tenm4 PE=1 SV=2	14	36	65	30	2771	308.2	6.57	171.44	98.4	96.3	101.3	100.2	102.1	101.7
Q8CJH3	Plxnb1	Plexin-B1 OS=Mus musculus OX=10090 GN=Plxnb1 PE=1 SV=2	20	33	51	32	2119	231.2	5.55	170.16	100.2	96.8	99.9	99	103.3	100.8
Q6NZL0	Soga3	Protein SOGA3 OS=Mus musculus OX=10090 GN=Soga3 PE=1 SV=2	31	32	75	27	945	103.4	6.14	233.78	99	101.3	100.1	97.1	100.1	102.4
P56399	Usp5	Ubiquitin carboxyl-terminal hydrolase 5 OS=Mus musculus OX=10090 GN=Usp5 PE=1 SV=1	34	27	67	27	858	95.8	5.01	231.42	102.3	98.5	99	97.6	102.4	100.2
Q9EQH3	Vps35	Vacuolar protein sorting-associated protein 35 OS=Mus musculus OX=10090 GN=Vps35 PE=1 SV=1	40	30	77	30	796	91.7	5.44	261.16	99.4	100.4	101.2	103.9	98.1	97
Q9CZW5	Tomm70	Mitochondrial import receptor subunit TOM70 OS=Mus musculus OX=10090 GN=Tomm70 PE=1 SV=2	51	34	93	34	611	67.5	7.53	265.29	98.9	101	99.2	98.9	105.3	96.6
Q5DU25	Iqsec2	IQ motif and SEC7 domain-containing protein 2 OS=Mus musculus OX=10090 GN=Iqsec2 PE=1 SV=3	27	35	62	28	1478	161.7	8.56	172.84	100	99.9	98	99.9	104.5	97.7
Q922D8	Mthfd1	C-1-tetrahydrofolate synthase, cytoplasmic OS=Mus musculus OX=10090 GN=Mthfd1 PE=1 SV=4	31	27	60	26	935	101.1	7.14	203.65	101.9	101.6	100.3	97.2	99.9	99.2
P09103	P4hb	Protein disulfide-isomerase OS=Mus musculus OX=10090 GN=P4hb PE=1 SV=2	52	29	80	29	509	57	4.88	265.82	100	101.5	103.6	98.3	95.1	101.5
D3YXK2	Safb	Scaffold attachment factor B1 OS=Mus musculus OX=10090 GN=Safb PE=1 SV=2	32	32	70	25	937	105	5.35	185.45	98.2	100.6	105.8	101.8	94.8	98.8
Q8JZQ2	Afg3l2	AFG3-like protein 2 OS=Mus musculus OX=10090 GN=Afg3l2 PE=1 SV=1	36	32	62	28	802	89.5	8.6	181.27	101.6	99.4	100	98.9	102	98.1
Q7TT50	Cdc42bpb	Serine/threonine-protein kinase MRCK beta OS=Mus musculus OX=10090 GN=Cdc42bpb PE=1 SV=2	21	35	68	30	1713	194.6	6.46	196.02	97.5	99.8	101.5	100.4	97.8	103
Q9QXY6	Ehd3	EH domain-containing protein 3 OS=Mus musculus OX=10090 GN=Ehd3 PE=1 SV=2	48	23	56	15	535	60.8	6.46	214.93	101.2	99.9	100.7	97	102.2	99
O08539	Bin1	Myc box-dependent-interacting protein 1 OS=Mus musculus OX=10090 GN=Bin1 PE=1 SV=1	42	22	61	20	588	64.4	5.03	221	103.3	99.6	99.3	97.3	100.9	99.6
Q99LF4	Rtcb	RNA-splicing ligase RtcB homolog OS=Mus musculus OX=10090 GN=Rtcb PE=1 SV=1	50	23	64	23	505	55.2	7.23	226.38	97.2	97.6	102	98.9	100.6	103.6
O88569	Hnrnpa2b1	Heterogeneous nuclear ribonucleoproteins A2/B1 OS=Mus musculus OX=10090 GN=Hnrnpa2b1 PE=1 SV=2	58	23	113	19	353	37.4	8.95	330.69	97.8	103	101.5	102.9	95.7	99.1
Q78PY7	Snd1	Staphylococcal nuclease domain-containing protein 1 OS=Mus musculus OX=10090 GN=Snd1 PE=1 SV=1	34	29	69	29	910	102	7.43	222.31	97.8	102.5	102.2	100.6	94.2	102.8
P20444	Prkca	Protein kinase C alpha type OS=Mus musculus OX=10090 GN=Prkca PE=1 SV=3	33	27	89	14	672	76.8	7.14	268.08	105.7	101	99.9	98.8	96.6	97.9
Q91ZA3	Pcca	Propionyl-CoA carboxylase alpha chain, mitochondrial OS=Mus musculus OX=10090 GN=Pcca PE=1 SV=2	42	26	63	26	724	79.9	7.25	213.43	101.5	100.4	98.4	99.1	101.6	99
P17742	Ppia	Peptidyl-prolyl cis-trans isomerase A OS=Mus musculus OX=10090 GN=Ppia PE=1 SV=2	83	17	246	15	164	18	7.9	564.99	102.1	101.5	99.4	100.5	95	101.6
Q9WU78	Pdcd6ip	Programmed cell death 6-interacting protein OS=Mus musculus OX=10090 GN=Pdcd6ip PE=1 SV=3	35	30	58	30	869	96	6.52	196.12	101.6	97.9	100.1	98.1	102.8	99.5
Q8CGY8	Ogt	UDP-N-acetylglucosamine--peptide N-acetylglucosaminyltransferase 110 kDa subunit OS=Mus musculus OX=10090 GN=Ogt PE=1 SV=2	26	27	53	27	1046	116.9	6.7	180.92	98.1	101.3	99.8	100.3	101	99.6
Q99JY9	Actr3	Actin-related protein 3 OS=Mus musculus OX=10090 GN=Actr3 PE=1 SV=3	50	23	87	19	418	47.3	5.88	262.19	102.5	104.8	97.9	95.8	100.9	98.1
Q60625	Icam5	Intercellular adhesion molecule 5 OS=Mus musculus OX=10090 GN=Icam5 PE=1 SV=2	31	28	84	28	917	96.9	6.32	249.55	101.3	100.4	100.3	98.1	99.6	100.2
P80316	Cct5	T-complex protein 1 subunit epsilon OS=Mus musculus OX=10090 GN=Cct5 PE=1 SV=1	47	27	62	26	541	59.6	6.02	212.91	100.2	102	101.1	98.6	96.9	101.1
Q8C1A5	Thop1	Thimet oligopeptidase OS=Mus musculus OX=10090 GN=Thop1 PE=1 SV=1	42	30	55	29	687	78	6.06	178.55	101.7	101.8	100.7	98.7	97.4	99.6
Q9Z140	Cpne6	Copine-6 OS=Mus musculus OX=10090 GN=Cpne6 PE=1 SV=1	44	24	99	23	557	61.7	5.59	299.81	101	101.2	101	95.2	100.1	101.6
O88643	Pak1	Serine/threonine-protein kinase PAK 1 OS=Mus musculus OX=10090 GN=Pak1 PE=1 SV=1	44	20	57	10	545	60.7	5.74	190.63	102.2	95.4	99.5	100	102.9	99.9
Q61548	Snap91	Clathrin coat assembly protein AP180 OS=Mus musculus OX=10090 GN=Snap91 PE=1 SV=1	27	24	77	23	901	91.8	4.88	283.4	99.7	98.9	101.3	102.1	101.1	96.9
P17751	Tpi1	Triosephosphate isomerase OS=Mus musculus OX=10090 GN=Tpi1 PE=1 SV=5	81	20	150	20	249	26.7	7.3	491.08	106	101.3	96.5	98.4	100.6	97.2
P11983	Tcp1	T-complex protein 1 subunit alpha OS=Mus musculus OX=10090 GN=Tcp1 PE=1 SV=3	43	24	65	23	556	60.4	6.16	204.7	98.3	102	101.2	99.7	97	101.8
Q8C419	Gpr158	Probable G-protein coupled receptor 158 OS=Mus musculus OX=10090 GN=Gpr158 PE=1 SV=2	27	28	60	28	1200	134.3	8.09	170.13	99.5	99.3	99.6	99.6	100.9	101.1
Q9CQV8	Ywhab	14-3-3 protein beta/alpha OS=Mus musculus OX=10090 GN=Ywhab PE=1 SV=3	68	19	208	9	246	28.1	4.83	587.82	100.5	98.7	101.3	98.1	101.9	99.5
Q9D394	Rufy3	Protein RUFY3 OS=Mus musculus OX=10090 GN=Rufy3 PE=1 SV=1	58	29	64	27	469	53	5.49	208.97	99.8	101.4	99.7	99.5	97.4	102.1
Q6A065	Cep170	Centrosomal protein of 170 kDa OS=Mus musculus OX=10090 GN=Cep170 PE=1 SV=2	24	35	59	34	1588	174.9	7.17	139.8	96.3	100.2	100.3	100.3	97.7	105.2
Q9R1R2	Trim3	Tripartite motif-containing protein 3 OS=Mus musculus OX=10090 GN=Trim3 PE=1 SV=1	41	24	53	22	744	80.7	7.81	174.45	98	100	101.8	99.7	98.9	101.6
P30275	Ckmt1	Creatine kinase U-type, mitochondrial OS=Mus musculus OX=10090 GN=Ckmt1 PE=1 SV=1	56	23	109	21	418	47	8.16	375.42	100.9	97.6	97.2	102.2	102.8	99.3
P50518	Atp6v1e1	V-type proton ATPase subunit E 1 OS=Mus musculus OX=10090 GN=Atp6v1e1 PE=1 SV=2	58	21	124	21	226	26.1	8.43	356.2	103.4	99.9	99.1	98.4	101.8	97.4
Q91WQ3	Yars1	Tyrosine--tRNA ligase, cytoplasmic OS=Mus musculus OX=10090 GN=Yars1 PE=1 SV=3	55	35	72	35	528	59.1	7.01	193.87	103.3	99.2	99.3	96.6	102.2	99.3
Q9WTS5	Tenm2	Teneurin-2 OS=Mus musculus OX=10090 GN=Tenm2 PE=1 SV=1	16	36	58	31	2764	306.3	6.68	175.46	93.9	97.3	103.9	102.3	97.7	104.9
P39447	Tjp1	Tight junction protein ZO-1 OS=Mus musculus OX=10090 GN=Tjp1 PE=1 SV=2	20	32	55	32	1745	194.6	6.64	158.29	100.1	98.4	100.9	100.6	99.9	100.2
Q9Z0J4	Nos1	Nitric oxide synthase, brain OS=Mus musculus OX=10090 GN=Nos1 PE=1 SV=1	26	37	69	37	1429	160.4	7.15	190.88	102	95.8	98.3	98.9	104.2	100.8
P26043	Rdx	Radixin OS=Mus musculus OX=10090 GN=Rdx PE=1 SV=3	51	39	67	25	583	68.5	6.2	177.23	101.3	100.9	99.1	97.1	98.8	102.8
G3X9J0	Sipa1l3	Signal-induced proliferation-associated 1-like protein 3 OS=Mus musculus OX=10090 GN=Sipa1l3 PE=1 SV=1	24	36	51	34	1776	194.9	8.32	130.53	97.8	106.2	103.3	93.9	98.3	100.6
Q9JKY5	Hip1r	Huntingtin-interacting protein 1-related protein OS=Mus musculus OX=10090 GN=Hip1r PE=1 SV=2	32	34	62	33	1068	119.4	6.52	177.83	99.2	96.8	101.3	101.7	98.3	102.7
Q7TME0	Plppr4	Phospholipid phosphatase-related protein type 4 OS=Mus musculus OX=10090 GN=Plppr4 PE=1 SV=2	34	24	64	24	766	83.2	8.84	196.63	98.4	101.8	101.2	97.3	99.4	101.9
Q9Z2Q6	Septin5	Septin-5 OS=Mus musculus OX=10090 GN=Septin5 PE=1 SV=2	56	24	84	21	369	42.7	6.67	313.34	103.4	97.8	99	101.4	102.7	95.8
Q99K51	Pls3	Plastin-3 OS=Mus musculus OX=10090 GN=Pls3 PE=1 SV=3	46	24	56	18	630	70.7	5.62	201.55	102.6	102.5	95.5	101.8	99.6	98.1
Q922B2	Dars1	Aspartate--tRNA ligase, cytoplasmic OS=Mus musculus OX=10090 GN=Dars1 PE=1 SV=2	57	29	70	29	501	57.1	6.49	221.55	97.4	101.8	101	100.7	97.2	101.9
Q91YT0	Ndufv1	NADH dehydrogenase [ubiquinone] flavoprotein 1, mitochondrial OS=Mus musculus OX=10090 GN=Ndufv1 PE=1 SV=1	54	23	85	23	464	50.8	8.21	228.25	100.6	99.2	98.7	99.5	103.2	98.8
Q8BTI8	Srrm2	Serine/arginine repetitive matrix protein 2 OS=Mus musculus OX=10090 GN=Srrm2 PE=1 SV=3	15	31	48	31	2703	294.7	12.03	144.11	96.6	98.6	100.7	103.3	98.6	102.2
Q91WC3	Acsl6	Long-chain-fatty-acid--CoA ligase 6 OS=Mus musculus OX=10090 GN=Acsl6 PE=1 SV=1	44	28	60	28	697	78	7.34	199.88	99.5	97.5	99.2	101.7	102.2	99.9
E9Q7G0	Numa1	Nuclear mitotic apparatus protein 1 OS=Mus musculus OX=10090 GN=Numa1 PE=1 SV=1	19	30	47	30	2094	235.5	5.87	142.42	95	96.9	100.6	103.1	102.4	102
Q148V7	Relch	RAB11-binding protein RELCH OS=Mus musculus OX=10090 GN=Relch PE=1 SV=1	25	24	51	24	1216	134.5	5.34	187.19	97.5	99.4	101.4	100.8	101.4	99.4
Q9D415	Dlgap1	Disks large-associated protein 1 OS=Mus musculus OX=10090 GN=Dlgap1 PE=1 SV=3	32	29	74	26	992	110.3	7.09	200.33	99.9	98	98.2	98.8	104.8	100.3
P80313	Cct7	T-complex protein 1 subunit eta OS=Mus musculus OX=10090 GN=Cct7 PE=1 SV=1	55	29	51	29	544	59.6	7.84	173.25	99.4	101.9	100.9	99.3	97.1	101.4
P05201	Got1	Aspartate aminotransferase, cytoplasmic OS=Mus musculus OX=10090 GN=Got1 PE=1 SV=3	57	24	130	24	413	46.2	7.14	385.5	105.1	99.2	98	98.1	103.8	95.9
Q04690	Nf1	Neurofibromin OS=Mus musculus OX=10090 GN=Nf1 PE=1 SV=1	12	35	68	35	2841	319.4	7.39	179.22	96.8	96.5	98.4	105.7	97.9	104.6
P26041	Msn	Moesin OS=Mus musculus OX=10090 GN=Msn PE=1 SV=3	47	34	73	23	577	67.7	6.6	183.91	102.3	99.5	104.4	96.9	97.3	99.7
P10649	Gstm1	Glutathione S-transferase Mu 1 OS=Mus musculus OX=10090 GN=Gstm1 PE=1 SV=2	71	19	113	15	218	26	7.94	317.39	102.9	97.8	101.7	98	105.7	94
Q68FF6	Git1	ARF GTPase-activating protein GIT1 OS=Mus musculus OX=10090 GN=Git1 PE=1 SV=1	36	27	70	22	770	85.2	6.93	232.95	100.6	101.1	98.8	98.6	99.3	101.7
P14152	Mdh1	Malate dehydrogenase, cytoplasmic OS=Mus musculus OX=10090 GN=Mdh1 PE=1 SV=3	52	21	116	21	334	36.5	6.58	334.18	104.5	100.4	98.2	98.3	101.7	96.9
P47757	Capzb	F-actin-capping protein subunit beta OS=Mus musculus OX=10090 GN=Capzb PE=1 SV=3	62	19	98	19	277	31.3	5.74	268.67	101.1	102.2	99.7	97.2	101	98.8
O88447	Klc1	Kinesin light chain 1 OS=Mus musculus OX=10090 GN=Klc1 PE=1 SV=3	41	24	61	15	541	61.4	5.68	224.56	99.3	99.9	98.7	101.4	99	101.7
Q8CAA7	Pgm2l1	Glucose 1,6-bisphosphate synthase OS=Mus musculus OX=10090 GN=Pgm2l1 PE=1 SV=1	40	28	67	27	621	70.2	6.49	199.82	101.1	102.6	97.8	99.5	100.5	98.4
Q60902	Eps15l1	Epidermal growth factor receptor substrate 15-like 1 OS=Mus musculus OX=10090 GN=Eps15l1 PE=1 SV=3	29	25	55	25	907	99.2	5.02	165.87	100.9	99.8	99.5	101.1	100.3	98.4
Q68FL4	Ahcyl2	Putative adenosylhomocysteinase 3 OS=Mus musculus OX=10090 GN=Ahcyl2 PE=1 SV=1	36	26	68	9	613	66.9	7.36	205.73	103	101.2	102.1	95.7	102.7	95.3
E9Q8I9	Fry	Protein furry homolog OS=Mus musculus OX=10090 GN=Fry PE=1 SV=1	12	32	43	32	3020	338.9	6.01	118.58	96.3	101.2	98.7	103.9	96	103.9
Q7TMK9	Syncrip	Heterogeneous nuclear ribonucleoprotein Q OS=Mus musculus OX=10090 GN=Syncrip PE=1 SV=2	39	21	62	21	623	69.6	8.59	220.71	96.7	103.1	101.5	102.5	95.5	100.7
A2ASQ1	Agrn	Agrin OS=Mus musculus OX=10090 GN=Agrn PE=1 SV=1	18	25	38	25	1950	207.4	6.32	118.49	98.8	97.1	99.8	99.9	102.9	101.6
Q9D0K2	Oxct1	Succinyl-CoA:3-ketoacid coenzyme A transferase 1, mitochondrial OS=Mus musculus OX=10090 GN=Oxct1 PE=1 SV=1	46	19	72	19	520	56	8.53	195.82	94.9	105.8	100.9	103.3	93.4	101.8
P84075	Hpca	Neuron-specific calcium-binding protein hippocalcin OS=Mus musculus OX=10090 GN=Hpca PE=1 SV=2	74	19	123	8	193	22.4	4.97	287.98	99.4	104.9	99.9	96.7	96.1	103
Q9Z2W9	Gria3	Glutamate receptor 3 OS=Mus musculus OX=10090 GN=Gria3 PE=1 SV=2	28	28	60	22	888	100.5	8.38	193.44	98.7	102.3	101.9	98.8	98.8	99.4
Q8BG05	Hnrnpa3	Heterogeneous nuclear ribonucleoprotein A3 OS=Mus musculus OX=10090 GN=Hnrnpa3 PE=1 SV=1	49	25	102	20	379	39.6	9.01	297.9	99.2	101.7	102.1	104.5	95.5	97
Q9DB05	Napa	Alpha-soluble NSF attachment protein OS=Mus musculus OX=10090 GN=Napa PE=1 SV=1	69	18	75	14	295	33.2	5.45	293.27	99.5	100.8	100.6	98.4	101.8	98.9
Q7TPH6	Mycbp2	E3 ubiquitin-protein ligase MYCBP2 OS=Mus musculus OX=10090 GN=Mycbp2 PE=1 SV=3	9	41	54	41	4749	520.9	7.09	112.14	98.3	101.1	98.1	100.8	98.2	103.6
Q8BIK4	Dock9	Dedicator of cytokinesis protein 9 OS=Mus musculus OX=10090 GN=Dock9 PE=1 SV=2	16	37	52	34	2055	235.2	7.25	138.02	99.5	99.8	100.6	99.5	96.3	104.3
P53810	Pitpna	Phosphatidylinositol transfer protein alpha isoform OS=Mus musculus OX=10090 GN=Pitpna PE=1 SV=2	70	28	92	25	271	31.9	6.37	289.04	100.7	99.6	101.1	99.9	100.7	98
Q8BMS1	Hadha	Trifunctional enzyme subunit alpha, mitochondrial OS=Mus musculus OX=10090 GN=Hadha PE=1 SV=1	41	28	60	28	763	82.6	9.14	194.84	101.1	98.4	101.9	98.5	101.1	98.9
Q9Z1G3	Atp6v1c1	V-type proton ATPase subunit C 1 OS=Mus musculus OX=10090 GN=Atp6v1c1 PE=1 SV=4	52	28	87	28	382	43.9	7.46	244.05	102.4	99.7	98.9	97.2	99.4	102.6
O08749	Dld	Dihydrolipoyl dehydrogenase, mitochondrial OS=Mus musculus OX=10090 GN=Dld PE=1 SV=2	44	21	70	21	509	54.2	7.9	230.2	101.5	99.5	97.2	99.9	104.5	97.4
Q5RJI5	Brsk1	Serine/threonine-protein kinase BRSK1 OS=Mus musculus OX=10090 GN=Brsk1 PE=1 SV=1	44	31	59	22	778	85.1	9.32	161.47	96.1	99.5	101.6	103.4	97.4	102
P35438	Grin1	Glutamate receptor ionotropic, NMDA 1 OS=Mus musculus OX=10090 GN=Grin1 PE=1 SV=1	25	31	69	31	938	105.4	8.84	191.16	99.9	103.8	99.9	97.6	100	98.9
Q9QUR6	Prep	Prolyl endopeptidase OS=Mus musculus OX=10090 GN=Prep PE=1 SV=1	42	25	51	25	710	80.7	5.73	160.51	95.9	100.7	102.4	100.8	96.3	103.9
P51881	Slc25a5	ADP/ATP translocase 2 OS=Mus musculus OX=10090 GN=Slc25a5 PE=1 SV=3	61	23	160	14	298	32.9	9.73	401.98	98.3	100.8	97.7	103.1	103.2	97
Q91YM2	Arhgap35	Rho GTPase-activating protein 35 OS=Mus musculus OX=10090 GN=Arhgap35 PE=1 SV=3	20	29	49	29	1499	170.3	6.61	155.49	97.7	98.3	100.1	100.1	100.5	103.3
P62874	Gnb1	Guanine nucleotide-binding protein G(I)/G(S)/G(T) subunit beta-1 OS=Mus musculus OX=10090 GN=Gnb1 PE=1 SV=3	61	15	87	9	340	37.4	6	338.27	102	97.1	101.2	99.6	102.6	97.5
Q9Z2I0	Letm1	Mitochondrial proton/calcium exchanger protein OS=Mus musculus OX=10090 GN=Letm1 PE=1 SV=1	34	25	56	25	738	82.9	6.52	168.91	99.2	99.5	100.4	101.1	101.5	98.3
Q9DBF1	Aldh7a1	Alpha-aminoadipic semialdehyde dehydrogenase OS=Mus musculus OX=10090 GN=Aldh7a1 PE=1 SV=4	45	21	64	21	539	58.8	7.47	216.93	102.2	97.7	100.9	99.9	101.5	97.8
Q6VNB8	Wdfy3	WD repeat and FYVE domain-containing protein 3 OS=Mus musculus OX=10090 GN=Wdfy3 PE=1 SV=1	12	36	53	36	3508	392.1	6.8	135	96.5	98.6	98.2	100.1	101.8	104.8
Q8VD04	Gripap1	GRIP1-associated protein 1 OS=Mus musculus OX=10090 GN=Gripap1 PE=1 SV=1	38	28	51	28	806	92.7	5.25	154.91	98.1	100.1	97.6	100.8	99.6	103.9
Q8VIJ6	Sfpq	Splicing factor, proline- and glutamine-rich OS=Mus musculus OX=10090 GN=Sfpq PE=1 SV=1	30	26	77	24	699	75.4	9.44	221.23	95.8	101.3	101.8	101.9	95.7	103.5
Q8BWF0	Aldh5a1	Succinate-semialdehyde dehydrogenase, mitochondrial OS=Mus musculus OX=10090 GN=Aldh5a1 PE=1 SV=1	45	20	49	20	523	55.9	8.25	198.86	101.5	98.8	97.5	101.1	101.8	99.5
Q80TZ3	Dnajc6	Putative tyrosine-protein phosphatase auxilin OS=Mus musculus OX=10090 GN=Dnajc6 PE=1 SV=2	30	27	58	24	938	102.2	7.23	183.86	101.4	99.6	100.7	98.5	101.2	98.5
Q9JLN9	Mtor	Serine/threonine-protein kinase mTOR OS=Mus musculus OX=10090 GN=Mtor PE=1 SV=2	14	35	45	35	2549	288.6	7.17	138.87	97.9	97.8	99.4	101	103.3	100.7
Q61696	Hspa1a	Heat shock 70 kDa protein 1A OS=Mus musculus OX=10090 GN=Hspa1a PE=1 SV=2	41	24	77	16	641	70	5.72	248.08	103.1	90.2	119.7	79.5	120.4	87.1
P18760	Cfl1	Cofilin-1 OS=Mus musculus OX=10090 GN=Cfl1 PE=1 SV=3	89	21	118	18	166	18.5	8.09	360.24	101.5	103.5	100.5	99.2	95.8	99.5
P61161	Actr2	Actin-related protein 2 OS=Mus musculus OX=10090 GN=Actr2 PE=1 SV=1	49	21	77	20	394	44.7	6.74	272.74	100.1	104.9	99	97	100.7	98.3
Q05816	Fabp5	Fatty acid-binding protein 5 OS=Mus musculus OX=10090 GN=Fabp5 PE=1 SV=3	77	13	76	13	135	15.1	6.54	333.31	98.7	102	100.2	99.7	98.4	101.1
Q6A4J8	Usp7	Ubiquitin carboxyl-terminal hydrolase 7 OS=Mus musculus OX=10090 GN=Usp7 PE=1 SV=1	24	29	46	29	1103	128.4	5.5	142.9	100.4	99.7	101.1	100.6	98.6	99.6
Q80YN3	Bcas1	Breast carcinoma-amplified sequence 1 homolog OS=Mus musculus OX=10090 GN=Bcas1 PE=1 SV=3	39	23	83	23	633	67.3	6.21	244.9	110.8	90.8	96	93.6	100.9	107.8
P99029	Prdx5	Peroxiredoxin-5, mitochondrial OS=Mus musculus OX=10090 GN=Prdx5 PE=1 SV=2	63	13	69	13	210	21.9	8.85	259.44	102.3	99.3	99.2	98.2	103.2	97.9
Q9EPU0	Upf1	Regulator of nonsense transcripts 1 OS=Mus musculus OX=10090 GN=Upf1 PE=1 SV=2	31	30	46	30	1124	123.9	6.61	151.61	99.1	100.5	101.2	101	98.5	99.8
Q5DTL9	Slc4a10	Sodium-driven chloride bicarbonate exchanger OS=Mus musculus OX=10090 GN=Slc4a10 PE=1 SV=2	23	24	56	18	1118	125.7	6.51	168.79	99.2	99.6	102.5	101.3	101.2	96.2
Q8BHN3	Ganab	Neutral alpha-glucosidase AB OS=Mus musculus OX=10090 GN=Ganab PE=1 SV=1	28	29	53	28	944	106.8	6.06	173.92	97.6	101.5	102.3	100.5	97.7	100.5
Q9D819	Ppa1	Inorganic pyrophosphatase OS=Mus musculus OX=10090 GN=Ppa1 PE=1 SV=1	72	21	64	21	289	32.6	5.6	230.15	97.5	101.8	103.4	100.2	97.7	99.4
P51830	Adcy9	Adenylate cyclase type 9 OS=Mus musculus OX=10090 GN=Adcy9 PE=1 SV=1	23	27	53	27	1353	150.9	7.21	173.02	100.8	99.6	97.8	97.9	103.5	100.5
P62821	Rab1A	Ras-related protein Rab-1A OS=Mus musculus OX=10090 GN=Rab1A PE=1 SV=3	90	18	91	9	205	22.7	6.21	291.38	101.7	101	100.3	99.1	100.3	97.6
Q61315	Apc	Adenomatous polyposis coli protein OS=Mus musculus OX=10090 GN=Apc PE=1 SV=1	13	38	53	38	2845	310.9	7.58	111.92	98.6	98.1	100	100.5	100.1	102.6
P29341	Pabpc1	Polyadenylate-binding protein 1 OS=Mus musculus OX=10090 GN=Pabpc1 PE=1 SV=2	35	26	62	26	636	70.6	9.5	210.88	98	102.6	101.5	99.7	95.3	103
Q8K596	Slc8a2	Sodium/calcium exchanger 2 OS=Mus musculus OX=10090 GN=Slc8a2 PE=1 SV=1	23	18	77	18	921	100.6	5.12	280.11	100.1	104	98.4	97.8	100	99.7
Q8BMF4	Dlat	Dihydrolipoyllysine-residue acetyltransferase component of pyruvate dehydrogenase complex, mitochondrial OS=Mus musculus OX=10090 GN=Dlat PE=1 SV=2	29	17	74	17	642	67.9	8.57	246.97	103.1	97.6	99	100.3	104	96
Q9CZ13	Uqcrc1	Cytochrome b-c1 complex subunit 1, mitochondrial OS=Mus musculus OX=10090 GN=Uqcrc1 PE=1 SV=2	45	19	76	18	480	52.8	6.21	278.99	102.3	100.2	98.9	99.8	101.1	97.8
Q62318	Trim28	Transcription intermediary factor 1-beta OS=Mus musculus OX=10090 GN=Trim28 PE=1 SV=3	38	27	59	27	834	88.8	5.77	193.29	95.7	101.7	101.2	103.4	96.1	101.9
Q8BWT1	Acaa2	3-ketoacyl-CoA thiolase, mitochondrial OS=Mus musculus OX=10090 GN=Acaa2 PE=1 SV=3	62	19	43	19	397	41.8	8.09	191.01	99.9	100.3	105.3	99.2	97	98.4
P21619	Lmnb2	Lamin-B2 OS=Mus musculus OX=10090 GN=Lmnb2 PE=1 SV=2	53	32	61	28	596	67.3	5.5	181.31	101.6	98.4	99.8	100.7	102.2	97.3
P61979	Hnrnpk	Heterogeneous nuclear ribonucleoprotein K OS=Mus musculus OX=10090 GN=Hnrnpk PE=1 SV=1	45	19	84	19	463	50.9	5.54	239.21	99.8	101.9	102.2	102.8	94.3	99
Q8BUV3	Gphn	Gephyrin OS=Mus musculus OX=10090 GN=Gphn PE=1 SV=2	32	24	60	24	769	83.2	5.6	182.55	100.6	100.9	98.9	98.3	101.7	99.6
Q9ES28	Arhgef7	Rho guanine nucleotide exchange factor 7 OS=Mus musculus OX=10090 GN=Arhgef7 PE=1 SV=2	28	24	49	21	862	97	6.8	145.92	98.4	101.6	100.9	97.8	100.5	100.8
Q61361	Bcan	Brevican core protein OS=Mus musculus OX=10090 GN=Bcan PE=1 SV=2	32	28	82	27	883	95.8	4.93	246.63	105.4	98.8	98.3	97.1	104.1	96.2
Q99KJ8	Dctn2	Dynactin subunit 2 OS=Mus musculus OX=10090 GN=Dctn2 PE=1 SV=3	63	24	57	24	402	44.1	5.26	205.61	103.1	99.3	100.2	98.9	97.9	100.6
Q02357	Ank1	Ankyrin-1 OS=Mus musculus OX=10090 GN=Ank1 PE=1 SV=2	19	32	53	28	1862	204.1	6.55	164.3	102.2	96.4	101.2	99.3	101.5	99.4
Q9CR16	Ppid	Peptidyl-prolyl cis-trans isomerase D OS=Mus musculus OX=10090 GN=Ppid PE=1 SV=3	57	24	56	22	370	40.7	7.43	183.72	98.8	99.6	100.6	97.1	105.6	98.2
Q3UH66	Wnk2	Serine/threonine-protein kinase WNK2 OS=Mus musculus OX=10090 GN=Wnk2 PE=1 SV=2	18	28	45	23	2149	227.4	5.91	119.82	100.7	98.8	98.4	101.8	99.2	101.2
Q80U63	Mfn2	Mitofusin-2 OS=Mus musculus OX=10090 GN=Mfn2 PE=1 SV=3	26	23	63	22	757	86.1	6.77	214.55	98.4	99.3	98.4	99.1	104.4	100.3
P37040	Por	NADPH--cytochrome P450 reductase OS=Mus musculus OX=10090 GN=Por PE=1 SV=2	37	25	66	25	678	77	5.53	184.57	100.1	100.5	99.6	100.1	98.7	101
P12970	Rpl7a	60S ribosomal protein L7a OS=Mus musculus OX=10090 GN=Rpl7a PE=1 SV=2	52	19	49	19	266	30	10.56	169.39	92.1	104.3	102.2	104.4	96.7	100.2
O88448	Klc2	Kinesin light chain 2 OS=Mus musculus OX=10090 GN=Klc2 PE=1 SV=1	39	22	44	14	599	66.6	7.21	148.82	101.3	98.2	100	102.8	96.6	101.1
A2AWA9	Rabgap1	Rab GTPase-activating protein 1 OS=Mus musculus OX=10090 GN=Rabgap1 PE=1 SV=1	29	34	60	32	1064	120.7	5.25	154.68	97.1	101.2	99.5	100.5	99.9	101.8
P56564	Slc1a3	Excitatory amino acid transporter 1 OS=Mus musculus OX=10090 GN=Slc1a3 PE=1 SV=2	21	11	75	10	543	59.6	8.4	307.82	99.3	98.1	99.4	100.8	105.1	97.3
P06151	Ldha	L-lactate dehydrogenase A chain OS=Mus musculus OX=10090 GN=Ldha PE=1 SV=3	46	21	104	20	332	36.5	7.74	340.68	98.5	100.2	103.1	100.1	99.6	98.4
P46471	Psmc2	26S proteasome regulatory subunit 7 OS=Mus musculus OX=10090 GN=Psmc2 PE=1 SV=5	58	22	59	22	433	48.6	5.95	199.3	100.1	101.8	101.3	99.9	95.8	101.1
Q9D0R2	Tars1	Threonine--tRNA ligase 1, cytoplasmic OS=Mus musculus OX=10090 GN=Tars1 PE=1 SV=2	36	26	49	25	722	83.3	7.36	144.48	97.7	101.9	101.9	99.2	98.3	100.9
Q58A65	Spag9	C-Jun-amino-terminal kinase-interacting protein 4 OS=Mus musculus OX=10090 GN=Spag9 PE=1 SV=2	24	32	57	23	1321	146.1	5.15	143.61	97.6	98.3	99.7	100.9	101.9	101.7
O54991	Cntnap1	Contactin-associated protein 1 OS=Mus musculus OX=10090 GN=Cntnap1 PE=1 SV=2	23	27	73	27	1385	156.2	7.06	218.42	101	98.6	97.9	101.7	99.6	101.2
Q9JLB0	Pals2	Protein PALS2 OS=Mus musculus OX=10090 GN=Pals2 PE=1 SV=1	48	30	71	29	553	62.6	6.4	197.47	101.4	99	98.9	103	101.2	96.5
Q9WTX6	Cul1	Cullin-1 OS=Mus musculus OX=10090 GN=Cul1 PE=1 SV=1	40	33	59	33	776	89.6	8	154.56	100.4	101.5	99.4	102.7	95.8	100.2
P48453	Ppp3cb	Serine/threonine-protein phosphatase 2B catalytic subunit beta isoform OS=Mus musculus OX=10090 GN=Ppp3cb PE=1 SV=2	32	17	114	10	525	59.1	5.91	363.08	98.6	99.7	99.7	98.9	102.7	100.4
Q3UM45	Ppp1r7	Protein phosphatase 1 regulatory subunit 7 OS=Mus musculus OX=10090 GN=Ppp1r7 PE=1 SV=2	55	21	63	21	361	41.3	4.92	191.11	101.7	100.8	99	99.1	101.8	97.7
P0DP27	Calm2	Calmodulin-2 OS=Mus musculus OX=10090 GN=Calm2 PE=1 SV=1	60	13	195	13	149	16.8	4.22	602.37	100.3	100.5	99.9	101.8	95.6	102
Q3UU96	Cdc42bpa	Serine/threonine-protein kinase MRCK alpha OS=Mus musculus OX=10090 GN=Cdc42bpa PE=1 SV=2	20	32	50	28	1719	195.4	6.51	151.17	95.1	100.7	103	99.5	98.1	103.6
P47738	Aldh2	Aldehyde dehydrogenase, mitochondrial OS=Mus musculus OX=10090 GN=Aldh2 PE=1 SV=1	44	22	51	21	519	56.5	7.62	190.1	103.3	100.3	101.5	95.1	101.2	98.6
Q9JKR6	Hyou1	Hypoxia up-regulated protein 1 OS=Mus musculus OX=10090 GN=Hyou1 PE=1 SV=1	28	28	60	28	999	111.1	5.19	157.35	99.2	98.7	104.7	100.3	99.9	97.2
B9EKR1	Ptprz1	Receptor-type tyrosine-protein phosphatase zeta OS=Mus musculus OX=10090 GN=Ptprz1 PE=1 SV=1	9	21	58	20	2312	254.2	4.88	176.7	99	98.7	107	100.4	99.5	95.4
P32921	Wars1	Tryptophan--tRNA ligase, cytoplasmic OS=Mus musculus OX=10090 GN=Wars1 PE=1 SV=2	39	19	54	19	481	54.3	6.89	170.78	101.4	99.6	100.2	97.4	102.5	99
Q9D8N0	Eef1g	Elongation factor 1-gamma OS=Mus musculus OX=10090 GN=Eef1g PE=1 SV=3	36	22	84	22	437	50	6.74	275.3	97.7	102.1	103.3	101.5	95.7	99.7
Q80Y24	Prickle2	Prickle-like protein 2 OS=Mus musculus OX=10090 GN=Prickle2 PE=1 SV=3	40	28	56	28	845	95.7	7.27	178.8	97.7	102.2	101.1	100	96.7	102.2
P63011	Rab3a	Ras-related protein Rab-3A OS=Mus musculus OX=10090 GN=Rab3a PE=1 SV=1	63	13	105	8	220	25	5.03	358.06	102.5	101.4	96.7	101.5	102.5	95.4
P70399	Tp53bp1	TP53-binding protein 1 OS=Mus musculus OX=10090 GN=Tp53bp1 PE=1 SV=3	19	25	43	25	1969	212.6	4.63	118.57	95.2	100.6	98	101	100.7	104.6
Q64511	Top2b	DNA topoisomerase 2-beta OS=Mus musculus OX=10090 GN=Top2b PE=1 SV=2	19	33	57	33	1612	181.8	8.29	156.11	95.3	103.1	103.3	103.6	93.7	100.9
Q9D0I9	Rars1	Arginine--tRNA ligase, cytoplasmic OS=Mus musculus OX=10090 GN=Rars1 PE=1 SV=2	37	24	45	24	660	75.6	7.55	147.3	98.1	98.7	99.9	99.6	101.1	102.5
Q61490	Alcam	CD166 antigen OS=Mus musculus OX=10090 GN=Alcam PE=1 SV=3	35	23	46	23	583	65.1	6.15	148.55	94.6	99.8	100.9	101.5	104.6	98.5
O89053	Coro1a	Coronin-1A OS=Mus musculus OX=10090 GN=Coro1a PE=1 SV=5	42	24	91	24	461	51	6.48	252.41	102.3	100.6	98.5	97.3	102.9	98.4
P70207	Plxna2	Plexin-A2 OS=Mus musculus OX=10090 GN=Plxna2 PE=1 SV=2	15	29	53	12	1894	211.4	6.54	169.13	97.4	97.4	102.7	102.4	101.1	99.1
Q61036	Pak3	Serine/threonine-protein kinase PAK 3 OS=Mus musculus OX=10090 GN=Pak3 PE=1 SV=2	41	20	56	9	559	62.4	5.4	192.44	100.2	99.3	101.7	99.7	99.2	100
Q99PU5	Acsbg1	Long-chain-fatty-acid--CoA ligase ACSBG1 OS=Mus musculus OX=10090 GN=Acsbg1 PE=1 SV=1	33	21	58	21	721	80.4	5.94	226.82	95.1	102.7	100.4	104	97.4	100.3
O35136	Ncam2	Neural cell adhesion molecule 2 OS=Mus musculus OX=10090 GN=Ncam2 PE=1 SV=1	31	27	59	27	837	93.1	6.07	178.48	98.9	94.8	99.7	107.7	101.6	97.2
Q9DC07	Nebl	LIM zinc-binding domain-containing Nebulette OS=Mus musculus OX=10090 GN=Nebl PE=1 SV=1	68	18	46	16	270	31.1	8.31	162.17	105	99.9	96.9	95.7	104.4	98
Q7TSC1	Prrc2a	Protein PRRC2A OS=Mus musculus OX=10090 GN=Prrc2a PE=1 SV=1	18	30	63	27	2158	229.1	9.39	126.88	96.2	101.8	105	101.3	93.5	102.2
O55029	Copb2	Coatomer subunit beta' OS=Mus musculus OX=10090 GN=Copb2 PE=1 SV=2	33	26	51	26	905	102.4	5.3	160.89	96.7	102.5	103.4	101	94.7	101.8
Q99NB9	Sf3b1	Splicing factor 3B subunit 1 OS=Mus musculus OX=10090 GN=Sf3b1 PE=1 SV=1	25	27	43	27	1304	145.7	7.09	138.13	94.8	101.8	101.8	103.6	96.4	101.6
P21279	Gnaq	Guanine nucleotide-binding protein G(q) subunit alpha OS=Mus musculus OX=10090 GN=Gnaq PE=1 SV=4	47	19	78	13	359	42.1	5.68	256.52	101.5	101.3	100.7	99.1	98.7	98.7
Q8BU30	Iars1	Isoleucine--tRNA ligase, cytoplasmic OS=Mus musculus OX=10090 GN=Iars1 PE=1 SV=2	21	29	61	29	1262	144.2	6.55	184.1	96.5	98.3	101.3	99.6	97.2	107.2
Q8BKC5	Ipo5	Importin-5 OS=Mus musculus OX=10090 GN=Ipo5 PE=1 SV=3	20	21	56	20	1097	123.5	4.93	201.22	99	101.7	100.5	99.4	99.9	99.6
Q60598	Cttn	Src substrate cortactin OS=Mus musculus OX=10090 GN=Cttn PE=1 SV=2	40	26	76	26	546	61.2	5.4	228.81	101.9	102.9	99.2	96.9	99.8	99.3
Q9WV34	Mpp2	MAGUK p55 subfamily member 2 OS=Mus musculus OX=10090 GN=Mpp2 PE=1 SV=1	47	25	62	24	552	61.5	6.44	202.13	100.7	98.5	96.7	99.1	103.5	101.5
Q8JZQ9	Eif3b	Eukaryotic translation initiation factor 3 subunit B OS=Mus musculus OX=10090 GN=Eif3b PE=1 SV=1	29	23	72	23	803	91.3	5.02	219.47	97.4	102.1	102.6	100.4	96.5	101
Q6DFV3	Arhgap21	Rho GTPase-activating protein 21 OS=Mus musculus OX=10090 GN=Arhgap21 PE=1 SV=1	17	29	45	29	1944	215.6	7.64	125.85	100.5	97.6	100.8	98.7	100.9	101.5
Q9CPY7	Lap3	Cytosol aminopeptidase OS=Mus musculus OX=10090 GN=Lap3 PE=1 SV=3	44	20	59	20	519	56.1	7.72	199.26	101.6	95.8	96.2	97.1	109.9	99.3
Q8BMJ2	Lars1	Leucine--tRNA ligase, cytoplasmic OS=Mus musculus OX=10090 GN=Lars1 PE=1 SV=2	24	26	53	26	1178	134.1	7.05	155.91	100.8	98.8	98.9	101.1	99.6	100.8
Q925I1	Atad3	ATPase family AAA domain-containing protein 3 OS=Mus musculus OX=10090 GN=Atad3 PE=1 SV=1	43	27	62	27	591	66.7	9.29	193.99	97.4	100.3	99.9	101.4	101.7	99.3
Q61792	Lasp1	LIM and SH3 domain protein 1 OS=Mus musculus OX=10090 GN=Lasp1 PE=1 SV=1	60	20	85	18	263	30	7.05	229.09	101.4	100.4	99.8	101.3	99	98.1
Q6P5E4	Uggt1	UDP-glucose:glycoprotein glucosyltransferase 1 OS=Mus musculus OX=10090 GN=Uggt1 PE=1 SV=4	18	27	48	27	1551	176.3	5.62	141.4	95.6	101.1	102.4	101.2	96.9	102.8
Q9CVB6	Arpc2	Actin-related protein 2/3 complex subunit 2 OS=Mus musculus OX=10090 GN=Arpc2 PE=1 SV=3	47	18	59	18	300	34.3	7.36	191.97	100.5	103.5	100.6	97.8	99.9	97.7
Q62095	Ddx3y	ATP-dependent RNA helicase DDX3Y OS=Mus musculus OX=10090 GN=Ddx3y PE=1 SV=2	41	25	59	2	658	73.4	7.53	158.55	119.5	128.5	26.4	154.2	29.1	142.2
P10630	Eif4a2	Eukaryotic initiation factor 4A-II OS=Mus musculus OX=10090 GN=Eif4a2 PE=1 SV=2	55	24	71	10	407	46.4	5.48	234.18	96.2	103	101.6	104.3	94.5	100.4
Q61543	Glg1	Golgi apparatus protein 1 OS=Mus musculus OX=10090 GN=Glg1 PE=1 SV=1	27	31	58	31	1175	133.6	6.84	162.99	96.4	101.3	102.2	102.8	96	101.3
Q6PFD5	Dlgap3	Disks large-associated protein 3 OS=Mus musculus OX=10090 GN=Dlgap3 PE=1 SV=1	35	29	55	28	977	105.8	8.76	164.65	103	98.6	99.2	98.5	101.5	99.2
O35382	Exoc4	Exocyst complex component 4 OS=Mus musculus OX=10090 GN=Exoc4 PE=1 SV=2	24	22	55	22	975	110.5	6.49	167.18	98.8	99.4	99	99.3	103	100.5
Q64331	Myo6	Unconventional myosin-VI OS=Mus musculus OX=10090 GN=Myo6 PE=1 SV=1	21	30	43	29	1265	146.3	8.85	113.56	101.8	99.4	99.3	99.9	101.3	98.3
Q8CJ19	Mical3	[F-actin]-monooxygenase MICAL3 OS=Mus musculus OX=10090 GN=Mical3 PE=1 SV=2	17	36	50	36	1993	223.6	5.47	115.16	101	98.3	98.8	99.4	102.8	99.8
Q99K48	Nono	Non-POU domain-containing octamer-binding protein OS=Mus musculus OX=10090 GN=Nono PE=1 SV=3	43	23	74	20	473	54.5	8.95	208.88	97.2	103.3	99	102.9	95.8	101.8
Q9D0F9	Pgm1	Phosphoglucomutase-1 OS=Mus musculus OX=10090 GN=Pgm1 PE=1 SV=4	43	24	53	24	562	61.4	6.57	158.45	102.2	99.1	98.5	97.4	106.3	96.5
Q9JIS5	Sv2a	Synaptic vesicle glycoprotein 2A OS=Mus musculus OX=10090 GN=Sv2a PE=1 SV=1	21	19	103	18	742	82.6	5.57	320.3	101.1	99	97.6	100.7	104.9	96.7
Q8BGD9	Eif4b	Eukaryotic translation initiation factor 4B OS=Mus musculus OX=10090 GN=Eif4b PE=1 SV=1	43	29	71	29	611	68.8	5.67	185.24	99.9	100.2	101.2	98.4	96.2	104.1
P70232	Chl1	Neural cell adhesion molecule L1-like protein OS=Mus musculus OX=10090 GN=Chl1 PE=1 SV=2	25	24	43	24	1209	135	5.57	152.15	96	100.4	103.5	102.3	97.9	99.9
P13707	Gpd1	Glycerol-3-phosphate dehydrogenase [NAD(+)], cytoplasmic OS=Mus musculus OX=10090 GN=Gpd1 PE=1 SV=3	64	24	63	22	349	37.5	7.17	181.22	112.7	94	93.8	91.9	114	93.7
Q91WD5	Ndufs2	NADH dehydrogenase [ubiquinone] iron-sulfur protein 2, mitochondrial OS=Mus musculus OX=10090 GN=Ndufs2 PE=1 SV=1	47	19	83	19	463	52.6	6.99	259.68	98.7	99.8	97.2	104	100.9	99.5
Q3B7Z2	Osbp	Oxysterol-binding protein 1 OS=Mus musculus OX=10090 GN=Osbp PE=1 SV=3	35	23	48	22	805	88.7	7.2	156.48	96.5	100.1	101.1	97.9	101.4	103.1
Q8CH77	Nav1	Neuron navigator 1 OS=Mus musculus OX=10090 GN=Nav1 PE=1 SV=2	17	30	40	29	1875	202.2	8.06	111.89	89.4	101.4	102	101.1	99.5	106.7
Q9Z1Z0	Uso1	General vesicular transport factor p115 OS=Mus musculus OX=10090 GN=Uso1 PE=1 SV=2	30	25	61	25	959	106.9	4.93	206.97	98.1	102.1	101.8	99.3	97.4	101.4
P97300	Nptn	Neuroplastin OS=Mus musculus OX=10090 GN=Nptn PE=1 SV=3	40	18	85	18	397	44.3	7.74	239.24	99.3	102.1	99.6	99.3	101.8	97.9
B1AWN6	Scn2a	Sodium channel protein type 2 subunit alpha OS=Mus musculus OX=10090 GN=Scn2a PE=1 SV=1	12	24	57	14	2006	227.8	5.67	178.57	99.9	98.4	99.4	97.4	103.9	101.1
O55042	Snca	Alpha-synuclein OS=Mus musculus OX=10090 GN=Snca PE=1 SV=2	61	11	89	8	140	14.5	4.77	375.94	99.7	99	100.7	95.3	99.8	105.5
Q9WUA2	Farsb	Phenylalanine--tRNA ligase beta subunit OS=Mus musculus OX=10090 GN=Farsb PE=1 SV=2	45	27	58	27	589	65.7	7.12	182.13	98.1	102.7	103.1	101.7	94.4	100.1
Q7TPD3	Robo2	Roundabout homolog 2 OS=Mus musculus OX=10090 GN=Robo2 PE=1 SV=2	23	26	46	25	1470	161.1	6.33	141.04	96.4	104.9	101	98.3	97.3	102.1
Q9CZD3	Gars1	Glycine--tRNA ligase OS=Mus musculus OX=10090 GN=Gars1 PE=1 SV=1	32	26	59	26	729	81.8	6.65	176.89	98.8	97.8	101.1	99.7	101.5	101.1
P62192	Psmc1	26S proteasome regulatory subunit 4 OS=Mus musculus OX=10090 GN=Psmc1 PE=1 SV=1	54	25	64	23	440	49.2	6.21	161.74	99.3	100.7	100.8	100.2	98.5	100.5
Q80WJ7	Mtdh	Protein LYRIC OS=Mus musculus OX=10090 GN=Mtdh PE=1 SV=1	42	22	41	22	579	63.8	9.33	112.93	96	101.8	101.4	105.1	95.2	100.4
Q80TR1	Adgrl1	Adhesion G protein-coupled receptor L1 OS=Mus musculus OX=10090 GN=Adgrl1 PE=1 SV=2	18	22	43	22	1466	161.6	6.48	133.53	97.7	102.1	103.8	98.6	99.3	98.6
P10852	Slc3a2	4F2 cell-surface antigen heavy chain OS=Mus musculus OX=10090 GN=Slc3a2 PE=1 SV=1	37	20	56	20	526	58.3	5.91	200.95	102.4	97.4	98.5	100.4	105.2	96.2
Q9D5V5	Cul5	Cullin-5 OS=Mus musculus OX=10090 GN=Cul5 PE=1 SV=3	27	24	49	24	780	90.9	7.81	149.26	98.3	100	100.5	97.7	101.6	102.1
P02468	Lamc1	Laminin subunit gamma-1 OS=Mus musculus OX=10090 GN=Lamc1 PE=1 SV=2	22	30	51	30	1607	177.2	5.21	139.09	93.6	96.7	101.8	112.9	96.6	98.4
A2AQ25	Skt	Sickle tail protein OS=Mus musculus OX=10090 GN=Skt PE=1 SV=1	17	32	55	32	1946	212.9	7.77	150.69	101	96	96.9	106.3	100.7	99.1
Q8CC35	Synpo	Synaptopodin OS=Mus musculus OX=10090 GN=Synpo PE=1 SV=2	33	19	51	19	929	99.5	9.42	185.93	104.9	97.4	97.7	97.6	103.6	98.8
P63330	Ppp2ca	Serine/threonine-protein phosphatase 2A catalytic subunit alpha isoform OS=Mus musculus OX=10090 GN=Ppp2ca PE=1 SV=1	60	15	72	2	309	35.6	5.54	282.68	100.9	101.3	98.5	100.4	99.1	99.8
B1AZP2	Dlgap4	Disks large-associated protein 4 OS=Mus musculus OX=10090 GN=Dlgap4 PE=1 SV=1	28	24	60	23	992	108	7.08	176.3	98.1	100	102.4	97.6	101.6	100.2
Q9CW03	Smc3	Structural maintenance of chromosomes protein 3 OS=Mus musculus OX=10090 GN=Smc3 PE=1 SV=2	25	30	51	29	1217	141.5	7.18	136.16	98	99.7	98.8	105.1	97.8	100.5
Q8BH66	Atl1	Atlastin-1 OS=Mus musculus OX=10090 GN=Atl1 PE=1 SV=1	32	20	68	19	558	63.3	6.49	206.27	100.2	101.1	101.2	101.4	96.5	99.7
Q9R1Q8	Tagln3	Transgelin-3 OS=Mus musculus OX=10090 GN=Tagln3 PE=1 SV=1	75	14	72	11	199	22.5	7.33	216.13	99.4	98.4	99.9	103.4	96.7	102.2
Q9D2V7	Coro7	Coronin-7 OS=Mus musculus OX=10090 GN=Coro7 PE=1 SV=2	27	21	35	21	922	100.7	5.77	134.24	99.4	101.7	100.3	97.8	99	101.9
O70589	Cask	Peripheral plasma membrane protein CASK OS=Mus musculus OX=10090 GN=Cask PE=1 SV=2	27	24	48	24	926	105	6.43	178.54	96.8	100.7	98.7	102.3	103.3	98.3
Q9ESN9	Mapk8ip3	C-Jun-amino-terminal kinase-interacting protein 3 OS=Mus musculus OX=10090 GN=Mapk8ip3 PE=1 SV=1	25	32	45	23	1337	147.5	5.45	102.64	95	97.5	101.5	97.3	107.7	100.8
Q5SXY1	Specc1	Cytospin-B OS=Mus musculus OX=10090 GN=Specc1 PE=1 SV=2	29	27	48	26	1067	118	6.64	136.59	99.3	98	101.6	97	103	101.1
Q60930	Vdac2	Voltage-dependent anion-selective channel protein 2 OS=Mus musculus OX=10090 GN=Vdac2 PE=1 SV=2	64	16	92	15	295	31.7	7.49	323.36	101.5	100.5	97.8	99.2	103.3	97.7
Q9ESN6	Trim2	Tripartite motif-containing protein 2 OS=Mus musculus OX=10090 GN=Trim2 PE=1 SV=1	25	18	44	16	744	81.4	6.96	167.9	98.7	97.3	100.7	97.4	103.9	102
Q01097	Grin2b	Glutamate receptor ionotropic, NMDA 2B OS=Mus musculus OX=10090 GN=Grin2b PE=1 SV=3	18	25	73	23	1482	165.9	6.87	227.03	100.3	104.7	99.6	98.4	98.5	98.5
P02088	Hbb-b1	Hemoglobin subunit beta-1 OS=Mus musculus OX=10090 GN=Hbb-b1 PE=1 SV=2	82	12	65	5	147	15.8	7.65	261.04	61.1	60.5	191.4	164.2	59.8	63.1
P24527	Lta4h	Leukotriene A-4 hydrolase OS=Mus musculus OX=10090 GN=Lta4h PE=1 SV=4	42	22	57	22	611	69	6.42	203.89	98.8	104.5	103.9	96.5	99.7	96.6
Q8CIB5	Fermt2	Fermitin family homolog 2 OS=Mus musculus OX=10090 GN=Fermt2 PE=1 SV=1	30	20	48	20	680	77.8	6.7	168.68	96.8	98.5	100.6	101.5	101.3	101.4
P62823	Rab3c	Ras-related protein Rab-3C OS=Mus musculus OX=10090 GN=Rab3c PE=1 SV=1	54	11	90	7	227	25.9	5.24	259.66	101.9	102.7	96	105	101.1	93.2
Q8C1B1	Camsap2	Calmodulin-regulated spectrin-associated protein 2 OS=Mus musculus OX=10090 GN=Camsap2 PE=1 SV=3	22	31	54	30	1461	164.2	6.86	121.64	97.8	99	101.3	100.2	98.8	102.9
O08917	Flot1	Flotillin-1 OS=Mus musculus OX=10090 GN=Flot1 PE=1 SV=1	52	21	48	21	428	47.5	7.15	161.91	101.4	100.6	102.4	98.1	97.6	99.8
P80317	Cct6a	T-complex protein 1 subunit zeta OS=Mus musculus OX=10090 GN=Cct6a PE=1 SV=3	45	24	51	21	531	58	7.08	158.67	97.6	102.2	101.4	99.8	97	102
Q9JKK7	Tmod2	Tropomodulin-2 OS=Mus musculus OX=10090 GN=Tmod2 PE=1 SV=2	55	21	59	18	351	39.5	5.35	212.56	102	100.3	100.2	97.7	100.4	99.4
Q60931	Vdac3	Voltage-dependent anion-selective channel protein 3 OS=Mus musculus OX=10090 GN=Vdac3 PE=1 SV=1	48	15	60	13	283	30.7	8.79	199.51	100.3	102.8	97.9	101	99.4	98.7
Q8BFZ3	Actbl2	Beta-actin-like protein 2 OS=Mus musculus OX=10090 GN=Actbl2 PE=1 SV=1	29	14	252	1	376	42	5.49	879.14	35	137.1	106.8	147.4	102.9	70.8
Q9CQA3	Sdhb	Succinate dehydrogenase [ubiquinone] iron-sulfur subunit, mitochondrial OS=Mus musculus OX=10090 GN=Sdhb PE=1 SV=1	60	19	61	19	282	31.8	8.68	168.78	101.5	99.3	99.4	102.2	98.8	98.9
Q3UH68	Limch1	LIM and calponin homology domains-containing protein 1 OS=Mus musculus OX=10090 GN=Limch1 PE=1 SV=2	29	25	32	25	1057	118.1	5.48	92.89	100	94.5	102	99.6	103.7	100.3
P30416	Fkbp4	Peptidyl-prolyl cis-trans isomerase FKBP4 OS=Mus musculus OX=10090 GN=Fkbp4 PE=1 SV=5	51	25	52	25	458	51.5	5.72	170.77	95.6	100.4	101.4	99.3	102.4	100.9
Q3UTJ2	Sorbs2	Sorbin and SH3 domain-containing protein 2 OS=Mus musculus OX=10090 GN=Sorbs2 PE=1 SV=2	23	26	48	25	1180	132.3	8.53	150.2	100.8	96.5	97.9	98.5	105.9	100.3
P62715	Ppp2cb	Serine/threonine-protein phosphatase 2A catalytic subunit beta isoform OS=Mus musculus OX=10090 GN=Ppp2cb PE=1 SV=1	55	14	71	1	309	35.6	5.43	278.76	97	105.3	98.4	93.6	101.4	104.3
Q80VC9	Camsap3	Calmodulin-regulated spectrin-associated protein 3 OS=Mus musculus OX=10090 GN=Camsap3 PE=1 SV=1	27	28	41	26	1252	135.1	8.43	113.64	94.3	100.6	101.4	100.1	102.1	101.5
Q60676	Ppp5c	Serine/threonine-protein phosphatase 5 OS=Mus musculus OX=10090 GN=Ppp5c PE=1 SV=3	46	24	62	24	499	56.8	6.2	190.1	102.4	100.9	100	98.4	99.8	98.4
Q99K85	Psat1	Phosphoserine aminotransferase OS=Mus musculus OX=10090 GN=Psat1 PE=1 SV=1	59	22	53	22	370	40.4	8.03	161.53	104.4	99.5	96.2	97.2	101.2	101.4
P70296	Pebp1	Phosphatidylethanolamine-binding protein 1 OS=Mus musculus OX=10090 GN=Pebp1 PE=1 SV=3	93	12	78	12	187	20.8	5.4	299.11	105.7	101.6	99.3	92.9	100.2	100.3
Q9R1P4	Psma1	Proteasome subunit alpha type-1 OS=Mus musculus OX=10090 GN=Psma1 PE=1 SV=1	58	17	57	17	263	29.5	6.46	197.09	99.8	103.1	99.1	100	96.6	101.4
A2A690	Tanc2	Protein TANC2 OS=Mus musculus OX=10090 GN=Tanc2 PE=1 SV=1	16	27	52	26	1994	220.1	7.97	145.51	99.9	99.4	100.7	101.6	99.8	98.6
Q61753	Phgdh	D-3-phosphoglycerate dehydrogenase OS=Mus musculus OX=10090 GN=Phgdh PE=1 SV=3	32	16	59	16	533	56.5	6.54	220.29	101.6	99.2	101.5	97	101.4	99.3
Q80X90	Flnb	Filamin-B OS=Mus musculus OX=10090 GN=Flnb PE=1 SV=3	13	28	37	25	2602	277.7	5.71	98.2	99.6	94.8	102.6	102.7	97.3	103
Q8K212	Pacs1	Phosphofurin acidic cluster sorting protein 1 OS=Mus musculus OX=10090 GN=Pacs1 PE=1 SV=2	27	24	49	24	961	104.8	7.74	156.65	100.3	99.3	100.3	102	98.6	99.5
[truncated: 6,016 more rows]
