# Supplementary material for: Integrating Proteomics and Transcriptomics Reveals the Potential Pathways of Hippocampal Neuron Apoptosis in Dravet Syndrome Model Mice
Source: Int J Mol Sci. 2024 Apr 18;25(8):4457. doi: 10.3390/ijms25084457 (PMC11050081; doi:10.3390/ijms25084457)
Supplement: Supplementary file 1 [file ijms-25-04457-s001.zip › supplementary Table S2.xlsx]

## Sheet: Sheet1
			Differentially Expressed Proteins (DEPs)
Accession	Gene Name	Description	Coverage [%]	# Peptides	# PSMs	# Unique Peptides	# AAs	MW [kDa]	calc. pI	Score Sequest HT: Sequest HT	KO1	KO2	KO3	WT1	WT2	WT3	P-value	FDR	FC	Regulated
A2APX8	Scn1a	Sodium channel protein type 1 subunit alpha OS=Mus musculus OX=10090 GN=Scn1a PE=1 SV=1	7	16	31	8	2009	228.7	5.87	92.79	0.725765	0.704318	0.718044	1.00972	1.03632	0.953961	0.000346	0.499409	0.716042	down
Q61823	Pdcd4	Programmed cell death protein 4 OS=Mus musculus OX=10090 GN=Pdcd4 PE=1 SV=1	7	4	5	4	469	51.7	5.16	11.67	0.841062	0.841062	0.809945	0.929835	1.02593	1.04423	0.0101794	0.867116	0.830689	down
Q8BSQ9	Pbrm1	Protein polybromo-1 OS=Mus musculus OX=10090 GN=Pbrm1 PE=1 SV=4	2	2	2	2	1634	187.1	6.9	7.71	0.740179	0.835714	0.78125	0.983036	0.963393	1.05357	0.00531064	0.838323	0.785714	down
Q80WV3	Chst2	Carbohydrate sulfotransferase 2 OS=Mus musculus OX=10090 GN=Chst2 PE=1 SV=3	6	3	3	3	530	57.8	9.99	5.88	0.729433	0.898537	0.85649	1.04296	0.983547	0.973492	0.0358785	0.918433	0.828154	down
Q9D6T0	Nosip	Nitric oxide synthase-interacting protein OS=Mus musculus OX=10090 GN=Nosip PE=1 SV=1	10	3	3	3	301	33.2	8.62	6.6	0.776364	0.854545	0.823636	1.00455	0.963636	1.03182	0.00381377	0.831854	0.818182	down
P98197	Atp11a	Phospholipid-transporting ATPase IH OS=Mus musculus OX=10090 GN=Atp11a PE=1 SV=1	2	3	3	1	1187	135.4	6.48	7.2	0.889461	0.738643	0.824046	0.951242	1.01938	1.02938	0.0218565	0.901655	0.817383	down
P60762	Morf4l1	Mortality factor 4-like protein 1 OS=Mus musculus OX=10090 GN=Morf4l1 PE=1 SV=2	5	2	2	2	362	41.5	9.32	3.21	0.781697	0.813621	0.87747	0.932198	1.01885	1.04895	0.0173563	0.901655	0.824263	down
Q3URQ0	Tex10	Testis-expressed protein 10 OS=Mus musculus OX=10090 GN=Tex10 PE=1 SV=1	2	1	1	1	928	105.1	9.16	5.03	0.884007	0.643234	0.745167	1.06151	1.0167	0.921793	0.0402097	0.94091	0.757469	down
Q62092	Nsg1	Neuronal vesicle trafficking-associated protein 1 OS=Mus musculus OX=10090 GN=Nsg1 PE=1 SV=3	6	1	2	1	185	20.9	6.21	6.13	0.800611	0.895878	0.799695	1.02137	0.941679	1.03695	0.0180818	0.901655	0.832061	down
P97480	Eya3	Eyes absent homolog 3 OS=Mus musculus OX=10090 GN=Eya3 PE=1 SV=2	3	1	2	1	510	55.9	5.19	3.73	0.805831	0.664025	0.625814	0.945938	0.940843	1.11322	0.0186711	0.901655	0.698556	down
Q3V1N1	Mfhas1	Malignant fibrous histiocytoma-amplified sequence 1 homolog OS=Mus musculus OX=10090 GN=Mfhas1 PE=1 SV=2	1	1	1	1	1048	116.5	7.18	3.19	0.83056	0.81059	0.805144	0.906808	1.10015	0.993041	0.0308058	0.901655	0.815431	down
Q9WVM3	Anapc7	Anaphase-promoting complex subunit 7 OS=Mus musculus OX=10090 GN=Anapc7 PE=1 SV=3	3	1	2	1	565	63	5.72	4.81	0.802198	0.857143	0.835165	0.919414	1.0467	1.03388	0.0179383	0.901655	0.831502	down
Q3THJ3	Eif1ad	Probable RNA-binding protein EIF1AD OS=Mus musculus OX=10090 GN=Eif1ad PE=1 SV=2	9	1	1	1	170	19.5	4.87	3.29	0.779369	0.796902	0.683811	0.939801	0.921391	1.13881	0.0340836	0.901655	0.753361	down
Q8BML1	Mical2	[F-actin]-monooxygenase MICAL2 OS=Mus musculus OX=10090 GN=Mical2 PE=1 SV=1	1	1	1	1	960	110	8.1	2.63	0.838101	0.755934	0.884662	0.978698	0.958612	1.06269	0.0243748	0.901655	0.826233	down
Q8BTI7	Ankrd52	Serine/threonine-protein phosphatase 6 regulatory ankyrin repeat subunit C OS=Mus musculus OX=10090 GN=Ankrd52 PE=1 SV=1	1	1	2	1	1076	115	6.54	3.75	0.774631	0.787285	0.861404	1.00241	0.98614	1.01145	0.0023758	0.656315	0.807773	down
Q9QXA7	Trim44	Tripartite motif-containing protein 44 OS=Mus musculus OX=10090 GN=Trim44 PE=1 SV=2	2	1	1	1	346	38.2	4.18	2.46	0.713728	0.833584	0.860619	0.974166	1.06518	0.960649	0.0240969	0.901655	0.802643	down
Q8CII2	Cdc123	Cell division cycle protein 123 homolog OS=Mus musculus OX=10090 GN=Cdc123 PE=1 SV=2	3	1	1	1	336	38.8	4.67	2.88	0.825613	0.718438	0.90554	0.947321	1.04814	1.00454	0.0407323	0.94091	0.81653	down
Q9DBX3	Susd2	Sushi domain-containing protein 2 OS=Mus musculus OX=10090 GN=Susd2 PE=1 SV=1	1	1	2	1	820	90.6	6.62	3.43	0.824337	0.810613	0.854529	1.08417	0.954254	0.961574	0.0181523	0.901655	0.829826	down
Q9D6V8	Paip2	Polyadenylate-binding protein-interacting protein 2 OS=Mus musculus OX=10090 GN=Paip2 PE=1 SV=1	6	1	1	1	124	14.7	4.12	2.25	0.869235	0.711772	0.879248	0.9821	1.01487	1.00303	0.0308812	0.901655	0.820085	down
P40338	Vhl	von Hippel-Lindau disease tumor suppressor OS=Mus musculus OX=10090 GN=Vhl PE=1 SV=1	6	1	1	1	181	20.8	6.11	1.69	0.861557	0.866101	0.725235	0.986974	1.04423	0.968797	0.0239933	0.901655	0.817631	down
Q8VBZ0	Dhrsx	Dehydrogenase/reductase SDR family member on chromosome X homolog OS=Mus musculus OX=10090 GN=Dhrsx PE=1 SV=2	2	1	1	1	335	35.9	8.09	2.15	0.714539	0.728723	0.875887	1.01241	0.966312	1.02128	0.0139423	0.901655	0.77305	down
P11679	Krt8	Keratin, type II cytoskeletal 8 OS=Mus musculus OX=10090 GN=Krt8 PE=1 SV=4	14	10	17	3	490	54.5	5.82	38.19	1.52848	1.67495	1.93264	0.907324	0.942586	1.15009	0.00710985	0.867116	1.71203	up
P09470	Ace	Angiotensin-converting enzyme OS=Mus musculus OX=10090 GN=Ace PE=1 SV=3	7	8	8	8	1312	150.8	6.55	20.81	1.14574	1.24439	1.33632	1.08296	0.952915	0.964126	0.0246686	0.901655	1.24215	up
Q9WV31	Arc	Activity-regulated cytoskeleton-associated protein OS=Mus musculus OX=10090 GN=Arc PE=1 SV=1	17	6	7	6	396	45.3	5.39	20.22	1.12907	1.22222	1.38272	0.953984	1.06622	0.979798	0.0398326	0.94091	1.24467	up
Q8BHB9	Clic6	Chloride intracellular channel protein 6 OS=Mus musculus OX=10090 GN=Clic6 PE=1 SV=1	11	3	5	3	596	62.8	4.32	9.34	4.509	7.43337	6.66627	0.5006	0.889556	1.60984	0.00508385	0.838323	6.20288	up
Q02013	Aqp1	Aquaporin-1 OS=Mus musculus OX=10090 GN=Aqp1 PE=1 SV=3	13	3	6	3	269	28.8	7.43	15.01	1.4173	2.07462	2.06179	0.892586	0.943916	1.1635	0.0215151	0.901655	1.85124	up
Q9R1E6	Enpp2	Ectonucleotide pyrophosphatase/phosphodiesterase family member 2 OS=Mus musculus OX=10090 GN=Enpp2 PE=1 SV=3	2	2	3	2	862	98.8	7.27	8.76	1.22089	1.27368	1.24448	0.914264	1.00749	1.07825	0.00782315	0.867116	1.24635	up
P05784	Krt18	Keratin, type I cytoskeletal 18 OS=Mus musculus OX=10090 GN=Krt18 PE=1 SV=5	5	3	4	1	423	47.5	5.33	9.52	1.40739	1.56391	1.85478	0.847826	0.932609	1.21957	0.0243585	0.901655	1.6087	up
O55187	Cbx4	E3 SUMO-protein ligase CBX4 OS=Mus musculus OX=10090 GN=Cbx4 PE=1 SV=2	6	2	2	2	551	60.5	9.33	3.36	1.11947	1.35085	1.33611	0.970888	0.924386	1.10473	0.0435491	0.952907	1.26881	up
P35846	Folr1	Folate receptor alpha OS=Mus musculus OX=10090 GN=Folr1 PE=1 SV=2	11	2	2	2	255	29.4	6.62	5.53	1.33948	1.91277	1.83993	0.941547	0.960432	1.09802	0.0202425	0.901655	1.69739	up
P19221	F2	Prothrombin OS=Mus musculus OX=10090 GN=F2 PE=1 SV=1	3	2	2	1	618	70.2	6.43	4.41	1.30558	1.39513	1.37038	0.814218	0.979183	1.2066	0.0378154	0.93203	1.35703	up
P50752	Tnnt2	Troponin T, cardiac muscle OS=Mus musculus OX=10090 GN=Tnnt2 PE=1 SV=2	5	1	1	1	301	35.8	5.01	3.95	1.1561	1.23827	1.35985	0.907317	1.04353	1.04916	0.0287335	0.901655	1.25141	up
Q8CI08	Slain2	SLAIN motif-containing protein 2 OS=Mus musculus OX=10090 GN=Slain2 PE=1 SV=2	2	1	1	1	581	62.3	9.47	2.66	1.11206	1.30798	1.25788	1.01521	0.909462	1.07532	0.0412974	0.94091	1.22597	up
P07309	Ttr	Transthyretin OS=Mus musculus OX=10090 GN=Ttr PE=1 SV=1	7	1	1	1	147	15.8	6.16	3.9	1.36341	1.54802	1.57297	1.01164	0.915593	1.07277	0.00353311	0.831854	1.4948	up
Q06770	Serpina6	Corticosteroid-binding globulin OS=Mus musculus OX=10090 GN=Serpina6 PE=1 SV=1	3	1	1	1	397	44.7	5.24	2.92	1.4059	1.17687	1.22109	1.02154	1.06009	0.918367	0.0307562	0.901655	1.26795	up
Q8VCV1	Abhd17c	Alpha/beta hydrolase domain-containing protein 17C OS=Mus musculus OX=10090 GN=Abhd17c PE=1 SV=2	3	1	1	1	320	35.1	5.64	2.78	2.14007	1.80334	1.40677	0.925325	1.00464	1.07004	0.022226	0.901655	1.7834	up
O88898	Tp63	Tumor protein 63 OS=Mus musculus OX=10090 GN=Tp63 PE=1 SV=1	1	1	1	1	680	76.7	6.65	2.02	1.1611	1.44872	1.46405	1.05737	0.905305	1.03733	0.030789	0.901655	1.35796	up
