# Supplementary material for: Integrating Proteomics and Transcriptomics Reveals the Potential Pathways of Hippocampal Neuron Apoptosis in Dravet Syndrome Model Mice
Source: Int J Mol Sci. 2024 Apr 18;25(8):4457. doi: 10.3390/ijms25084457 (PMC11050081; doi:10.3390/ijms25084457)
Supplement: Supplementary file 1 [file ijms-25-04457-s001.zip › supplementary Table S3.xlsx]

## Sheet: Sheet1
All Genes
gene_id	BaseMean_DESeq2	BaseMean_control_WT	BaseMean_case_KO	FoldChange	log2FoldChange	p-value	q-value	Regulation
0610009B22Rik	853.345	828.855	877.835	1.05921	0.0829849	0.511102	0.769476	Up
0610009E02Rik	30.803	30.3655	31.2406	1.02713	0.0386124	0.933698	0.973798	Up
0610009L18Rik	119.909	139.439	100.38	0.719753	-0.474427	0.0803497	0.281171	Down
0610010F05Rik	1821.92	1626.57	2017.28	1.2402	0.310573	0.0033108	0.0283419	Up
0610010K14Rik	829.597	794.115	865.078	1.08949	0.123657	0.313826	0.61212	Up
0610012G03Rik	1733.44	1674.68	1792.2	1.07022	0.0979021	0.455416	0.732093	Up
0610025J13Rik	1.48681	2.31134	0.662278	0.287427	-1.79873	0.392974	0.684044	Down
0610030E20Rik	425.89	408.918	442.862	1.08305	0.115102	0.412399	0.699348	Up
0610038B21Rik	2.47484	2.62726	2.32241	0.884018	-0.177852	0.903617	0.964324	Down
0610039K10Rik	2.14562	3.62896	0.662278	0.183168	-2.44876	0.186106	0.463589	Down
0610040B10Rik	48.1894	56.3344	40.0444	0.711111	-0.491853	0.247228	0.5411	Down
0610040F04Rik	13.9372	13.9031	13.9714	1.00608	0.00874479	0.989218	0.997333	Up
0610040J01Rik	158.045	161.113	154.978	0.961954	-0.0559606	0.784807	0.915486	Down
0610043K17Rik	2.48164	2.99556	1.96771	0.660877	-0.597545	0.706345	0.881867	Down
1110002E22Rik	87.1516	64.7205	109.583	1.69328	0.759819	0.0210422	0.113251	Up
1110002J07Rik	15.7891	12.2596	19.3186	1.57764	0.657768	0.273404	0.56938	Up
1110002L01Rik	560.809	598.458	523.16	0.873943	-0.194389	0.189421	0.468053	Down
1110002O04Rik	3.69837	3.64921	3.74752	1.02342	0.0333975	0.980289	0.995097	Up
1110004F10Rik	3973.86	4025.66	3922.06	0.974281	-0.03759	0.714757	0.885792	Down
1110006O24Rik	17.0044	20.4081	13.6008	0.666985	-0.584273	0.339949	0.636975	Down
1110008P14Rik	3734.6	3374.14	4095.06	1.21373	0.279444	0.0167748	0.0964105	Up
1110015O18Rik	7.45778	9.26522	5.65034	0.610685	-0.711499	0.440342	0.720997	Down
1110017D15Rik	43.0341	50.3756	35.6926	0.709017	-0.496107	0.190432	0.469114	Down
1110018N20Rik	170.917	175.867	165.967	0.943633	-0.0837028	0.674686	0.864778	Down
1110019D14Rik	53.1859	48.6889	57.6829	1.18418	0.243885	0.497686	0.761315	Up
1110020A21Rik	21.6337	22.9116	20.3559	0.88936	-0.169161	0.754046	0.903457	Down
1110025M09Rik	47.6006	56.1928	39.0084	0.694406	-0.526149	0.135955	0.38578	Down
1110032A03Rik	1026.29	1163.25	889.33	0.764521	-0.387372	0.0038013	0.0315897	Down
1110032F04Rik	552.763	631.329	474.198	0.751138	-0.41285	0.00744966	0.052461	Down
1110038B12Rik	362.039	271.363	452.715	1.66873	0.738751	1.28e-05	0.000278431	Up
1110038F14Rik	509.161	510.54	507.782	0.994765	-0.00757216	0.960613	0.98541	Down
1110046J04Rik	71.405	74.7784	68.0317	0.91011	-0.135887	0.666601	0.860813	Down
1110051M20Rik	3634.27	3929.14	3339.39	0.849861	-0.234701	0.0506837	0.209199	Down
1110059E24Rik	459.394	429.154	489.634	1.14108	0.190402	0.267395	0.562452	Up
1110059G10Rik	557.584	574.305	540.863	0.941684	-0.0866857	0.516519	0.772654	Down
1110065P20Rik	1894.37	2000.03	1788.7	0.894374	-0.161051	0.211236	0.498296	Down
1190005I06Rik	7.66281	12.6676	2.65799	0.210508	-2.24805	0.0222289	0.117885	Down
1190007I07Rik	170.889	180.296	161.482	0.895833	-0.158699	0.469365	0.742099	Down
1300002E11Rik	138.896	150.32	127.473	0.848397	-0.237188	0.321692	0.619792	Down
1300017J02Rik	2.1521	2.95545	1.34874	0.454215	-1.13855	0.492672	0.757942	Down
1500002C15Rik	9.45215	11.2544	7.64988	0.680531	-0.555268	0.500266	0.763091	Down
1500002F19Rik	30.2966	32.534	28.0592	0.863077	-0.212438	0.641362	0.847429	Down
1500004A13Rik	2164.65	2278.82	2050.47	0.899788	-0.152343	0.211367	0.498296	Down
1500009C09Rik	3429.1	3965.57	2892.63	0.729415	-0.455188	4.06e-05	0.000759816	Down
1500009L16Rik	688.021	692.331	683.712	0.987369	-0.0183393	0.90006	0.963018	Down
1500011B03Rik	2966.25	3213.53	2718.97	0.846136	-0.241038	0.0183419	0.10292	Down
1500012K07Rik	9.36613	8.2608	10.4715	1.26457	0.338651	0.686216	0.870785	Up
1500015A07Rik	729.119	696.639	761.599	1.09315	0.128489	0.349448	0.646021	Up
1500015L24Rik	7.11196	10.8916	3.33236	0.306076	-1.70804	0.0683597	0.253525	Down
1500026H17Rik	98.3568	110.808	85.9053	0.775097	-0.367551	0.158491	0.423208	Down
1500035N22Rik	11.1996	12.9561	9.44301	0.727933	-0.458122	0.59921	0.822759	Down
1600010M07Rik	2.0078	1.65691	2.35869	1.42163	0.507545	0.764225	0.907427	Up
1600012H06Rik	754.58	718.923	790.236	1.09917	0.136419	0.268069	0.563042	Up
1600014C10Rik	1031.15	1081.15	981.149	0.907602	-0.139869	0.237841	0.529029	Down
1600014C23Rik	4.38099	3.99687	4.76512	1.18985	0.250779	0.844034	0.940704	Up
1600015H23Rik	3.82824	6.98211	0.674369	0.0960424	-3.38018	0.0265163	0.133339	Down
1600020E01Rik	152.288	151.172	153.403	1.01509	0.0216028	0.919745	0.969475	Up
1600023N17Rik	10.8374	10.948	10.7269	0.979649	-0.0296635	0.969123	0.990217	Down
1600029I14Rik	1.65675	2.63914	0.674369	0.254409	-1.97478	0.344325	0.640852	Down
1700001G11Rik	9.13981	9.2002	9.07942	0.984167	-0.0230246	0.978757	0.994243	Down
1700001G17Rik	6.51989	8.99739	4.04239	0.448623	-1.15642	0.25824	0.552959	Down
1700001J03Rik	3.16921	2.31134	4.02709	1.73979	0.798911	0.553309	0.794543	Up
1700001L05Rik	235.367	244.396	226.338	0.925744	-0.111314	0.567467	0.802665	Down
1700001L19Rik	408.103	463.866	352.339	0.759388	-0.397091	0.0179066	0.101191	Down
1700001O22Rik	107.695	121.2	94.1895	0.777861	-0.362416	0.165081	0.433435	Down
1700001P01Rik	3.12908	3.93574	2.32241	0.590237	-0.760633	0.579182	0.809171	Down
1700003D09Rik	19.3559	13.9245	24.7873	1.78049	0.832277	0.134949	0.384356	Up
1700003E16Rik	815.603	906.069	725.138	0.800195	-0.321577	0.0437835	0.189364	Down
1700003F12Rik	7.14483	7.57658	6.71309	0.884134	-0.177664	0.846256	0.941647	Down
1700003M07Rik	555.656	660.892	450.421	0.681357	-0.553517	0.00039355	0.00510282	Down
1700007J10Rik	16.7419	16.1171	17.3668	1.07631	0.1061	0.868421	0.951094	Up
1700007K13Rik	66.5824	57.2553	75.9095	1.3269	0.40806	0.183727	0.459864	Up
1700007L15Rik	8.53024	8.60768	8.4528	0.979598	-0.0297387	0.972861	0.991843	Down
1700007P06Rik	4.63377	3.96747	5.30007	1.33838	0.420491	0.695428	0.875278	Up
1700008J07Rik	95.3214	102.431	88.2118	0.861423	-0.215206	0.448343	0.726481	Down
1700008O03Rik	45.8944	49.5996	42.1891	0.850017	-0.234437	0.52443	0.778006	Down
1700010I14Rik	33.229	22.8405	43.6176	1.91141	0.934637	0.0297308	0.145367	Up
1700010K23Rik	4.93792	5.24693	4.62891	0.88266	-0.18007	0.879564	0.955878	Down
1700012B09Rik	12.7761	16.5128	9.03933	0.546746	-0.871058	0.181305	0.456763	Down
1700012C14Rik	1.84617	3.00588	0.686459	0.225981	-2.14572	0.28106	0.577362	Down
1700012D01Rik	32.4096	37.4306	27.3887	0.731919	-0.450244	0.279974	0.576317	Down
1700012D14Rik	10.1119	12.8331	7.39067	0.574317	-0.800082	0.302949	0.600078	Down
1700013F07Rik	25.0742	24.4034	25.7451	1.05399	0.0758672	0.877421	0.955024	Up
1700014D04Rik	10.1621	6.92215	13.402	1.93306	0.950884	0.220593	0.509453	Up
1700016A09Rik	27.8747	38.1668	17.5827	0.461745	-1.11483	0.0301014	0.146625	Down
1700016K19Rik	46.884	51.1267	42.6413	0.834055	-0.261786	0.471924	0.743918	Down
1700016L04Rik	2.48874	0.98223	3.99526	4.05387	2.0193	0.251456	0.545302	Up
1700017B05Rik	754.135	763.313	744.957	0.975966	-0.0350971	0.803586	0.923157	Down
1700018A23Rik	19.77	22.2083	17.3317	0.781213	-0.356211	0.505358	0.765769	Down
1700018L02Rik	17.5764	19.5734	15.5793	0.797339	-0.326735	0.644342	0.848675	Down
1700019A02Rik	1.98058	2.30102	1.66014	0.721686	-0.470556	0.766457	0.908132	Down
1700019D03Rik	325.78	316.866	334.694	1.05636	0.0791067	0.677076	0.865735	Up
1700019G24Rik	6.51592	10.286	2.74584	0.264814	-1.91695	0.11819	0.354749	Down
1700020L24Rik	4.13201	6.60389	1.66014	0.25196	-1.98873	0.101117	0.323715	Down
1700020N18Rik	1.34199	2.34074	0.34323	0.153508	-2.70361	0.262341	0.557423	Down
1700022N22Rik	14.5921	15.1715	14.0127	0.923267	-0.115179	0.861264	0.948315	Down
1700023D09Rik	16.2736	16.8112	15.7359	0.934706	-0.0974148	0.869963	0.951942	Down
1700024G13Rik	7.75457	10.2046	5.30451	0.520413	-0.942272	0.320225	0.618361	Down
1700025G04Rik	3663.52	3710.28	3616.76	0.974805	-0.0368142	0.749426	0.900965	Down
1700026J14Rik	4.30666	4.96956	3.64376	0.735265	-0.443664	0.690189	0.873123	Down
1700027H10Rik	2.02667	2.36138	1.69197	0.71672	-0.480518	0.817081	0.928155	Down
1700028E10Rik	5.12292	3.27293	6.97292	2.12683	1.08871	0.396479	0.686598	Up
1700028J19Rik	60.4599	41.6028	79.3169	1.90705	0.931344	0.0696983	0.256937	Up
1700028K03Rik	4.30426	5.62321	2.98531	0.532121	-0.910175	0.412205	0.699234	Down
1700028P14Rik	54.0939	36.08	72.1077	1.99933	0.999514	0.00418464	0.0339808	Up
1700029I15Rik	17.56	18.1265	16.9936	0.937253	-0.0934894	0.873363	0.953513	Down
1700029J07Rik	52.2201	52.6723	51.7678	0.983171	-0.0244858	0.94352	0.977996	Down
1700030C10Rik	7.27798	13.5422	1.01377	0.0743064	-3.75037	0.00401347	0.032859	Down
1700030C12Rik	12.9418	15.8985	9.985	0.628894	-0.669112	0.299653	0.596287	Down
1700030C14Rik	2.35383	1.64659	3.06106	1.85002	0.887541	0.575417	0.807401	Up
1700030J22Rik	214.532	238.064	191	0.802218	-0.317934	0.138184	0.389283	Down
1700030K09Rik	271.85	278.227	265.473	0.954437	-0.0672779	0.69456	0.874982	Down
1700034H15Rik	33.2046	25.7681	40.6411	1.57758	0.657711	0.121414	0.360512	Up
1700034P13Rik	16.2267	17.476	14.9775	0.857181	-0.222328	0.707798	0.88255	Down
1700037C18Rik	62.2172	58.613	65.8214	1.12424	0.168945	0.62024	0.836074	Up
1700037H04Rik	1433.47	1450.05	1416.89	0.977195	-0.033282	0.813934	0.926917	Down
1700040D17Rik	24.2025	34.7406	13.6644	0.393617	-1.34513	0.0061106	0.0454992	Down
1700041B01Rik	7.25856	7.24995	7.26717	1.00409	0.00588166	0.994871	0.998644	Up
1700047M11Rik	91.0226	111.144	70.9016	0.637692	-0.649069	0.0192175	0.106542	Down
1700048F04Rik	3.00733	1.32911	4.68554	3.5318	1.82041	0.192983	0.472034	Up
1700048O20Rik	169.987	158.072	181.901	1.15009	0.201744	0.534858	0.784071	Up
1700052K11Rik	341.535	371.282	311.788	0.839668	-0.252109	0.140827	0.393276	Down
1700055D16Rik	4.78308	5.92239	3.64376	0.615988	-0.699025	0.546034	0.790265	Down
1700055D18Rik	6.65637	7.29882	6.01392	0.824448	-0.2785	0.761164	0.90647	Down
1700055L01Rik	1.47502	2.61889	0.331139	0.136853	-2.8693	0.231011	0.521411	Down
1700060J05Rik	6.50893	6.68488	6.33297	0.949378	-0.074946	0.946254	0.978963	Down
1700063D05Rik	13.8257	13.5558	14.0955	1.03853	0.0545421	0.932927	0.973633	Up
1700063O14Rik	7.29978	10.5852	4.01438	0.37901	-1.39969	0.151834	0.411384	Down
1700064M15Rik	2.18923	1.3295	3.04897	2.29139	1.19622	0.475309	0.746593	Up
1700065J18Rik	1.16025	2.32049	0	0.0794155	-3.65444	0.132469	0.380096	Down
1700066M21Rik	1460.85	1444.19	1477.51	1.02315	0.0330225	0.771055	0.910052	Up
1700071M16Rik	10.3363	9.02679	11.6458	1.29388	0.371698	0.661453	0.857725	Up
1700082M22Rik	8.32953	9.2843	7.37475	0.793953	-0.332874	0.681306	0.86783	Down
1700084E18Rik	4.99542	3.6496	6.34124	1.73975	0.798878	0.436057	0.717835	Up
1700086L19Rik	383.128	407.581	358.674	0.87991	-0.184572	0.406496	0.694947	Down
1700086O06Rik	173.142	157.708	188.576	1.19623	0.258496	0.247264	0.5411	Up
1700086P04Rik	4.80395	4.61158	4.99632	1.08297	0.115	0.91079	0.965561	Up
1700088E04Rik	189.16	176.042	202.279	1.14924	0.200679	0.347489	0.644031	Up
1700094D03Rik	120.411	135.187	105.634	0.781118	-0.356387	0.13699	0.3874	Down
1700094J05Rik	2.63768	4.62074	0.654628	0.143153	-2.80437	0.104377	0.329923	Down
1700095J03Rik	7.45076	10.2249	4.67666	0.457075	-1.1295	0.205147	0.489675	Down
1700096K18Rik	97.9728	111.125	84.8202	0.763276	-0.389723	0.130413	0.376011	Down
1700101I11Rik	50.9849	48.706	53.2638	1.09475	0.1306	0.716028	0.885913	Up
1700102H20Rik	5.81381	6.61537	5.01224	0.757537	-0.400611	0.667402	0.861042	Down
1700102P08Rik	22.6617	18.2182	27.1053	1.4879	0.57328	0.256134	0.550701	Up
1700105P06Rik	2.35083	1.65652	3.04514	1.83428	0.875218	0.564864	0.801147	Up
1700109H08Rik	5.11103	5.57279	4.64927	0.833839	-0.26216	0.809013	0.92556	Down
1700110C19Rik	2.63948	3.27177	2.00719	0.611924	-0.708575	0.646043	0.849463	Down
1700110K17Rik	3.15043	3.95871	2.34216	0.591179	-0.758333	0.638864	0.846333	Down
1700112D23Rik	19.8114	17.1355	22.4872	1.30991	0.389471	0.493907	0.758798	Up
1700112J16Rik	19.6797	20.4593	18.9002	0.924903	-0.112626	0.839476	0.938515	Down
1700113A16Rik	50.4856	62.8347	38.1365	0.606619	-0.721138	0.0457883	0.195647	Down
1700120C14Rik	5.61209	6.27881	4.94537	0.789752	-0.340529	0.759261	0.905861	Down
1700123M08Rik	27.5793	31.4188	23.7399	0.755337	-0.404807	0.38445	0.676185	Down
1700123O20Rik	775.496	713.053	837.938	1.17526	0.23298	0.0519261	0.212695	Up
1700124L16Rik	6.00974	6.63601	5.38347	0.810183	-0.303681	0.751694	0.901959	Down
1700125H20Rik	6.70737	7.36073	6.05402	0.822958	-0.281109	0.780849	0.913385	Down
1810009A15Rik	4.47989	4.6219	4.33787	0.93831	-0.0918628	0.930456	0.972847	Down
1810010H24Rik	101.383	127.905	74.8624	0.58512	-0.773196	0.0071636	0.0510839	Down
1810010K12Rik	13.1198	17.4836	8.75593	0.49921	-1.00228	0.142215	0.395413	Down
1810013D15Rik	2.64146	4.29333	0.989593	0.231734	-2.10946	0.181248	0.456694	Down
1810013L24Rik	2116.74	1907.04	2326.45	1.22003	0.286919	0.00721296	0.0513461	Up
1810019N24Rik	3.16292	3.29279	3.03305	0.917738	-0.123846	0.922949	0.97011	Down
1810020O05Rik	366.341	421.951	310.731	0.736468	-0.441305	0.0036082	0.0302782	Down
1810021B22Rik	23.8385	26.9913	20.6857	0.765888	-0.384795	0.486932	0.754195	Down
1810024B03Rik	19.9816	20.5632	19.4	0.94365	-0.0836763	0.883948	0.957663	Down
1810030O07Rik	912.678	902.038	923.318	1.02358	0.0336201	0.770122	0.909816	Up
1810034E14Rik	1.99144	2.63797	1.34491	0.508122	-0.976752	0.535778	0.784517	Down
1810037I17Rik	2241.37	2183.56	2299.18	1.05301	0.0745136	0.575033	0.807401	Up
1810041H14Rik	14.3395	10.2138	18.4652	1.80407	0.851256	0.188573	0.466861	Up
1810044D09Rik	16.4679	20.5208	12.415	0.604195	-0.726913	0.218869	0.507829	Down
1810055G02Rik	736.458	616.299	856.617	1.39018	0.475275	0.000726487	0.00850046	Up
1810058I24Rik	544.269	505.802	582.735	1.15239	0.204623	0.22083	0.509612	Up
1810062O18Rik	36.7045	19.1718	54.2372	2.82774	1.49965	0.00069227	0.00818673	Up
1810073O08Rik	3.80089	4.27386	3.32792	0.778352	-0.361505	0.763215	0.907101	Down
2010001A14Rik	111.455	115.939	106.97	0.922726	-0.116026	0.661569	0.857725	Down
2010203P06Rik	2.15274	1.65574	2.64973	1.60379	0.681487	0.677732	0.866337	Up
2010204K13Rik	719.961	735.342	704.58	0.957961	-0.0619606	0.685781	0.870645	Down
2010308F09Rik	7.00236	9.60256	4.40215	0.456664	-1.1308	0.264364	0.559017	Down
2010315B03Rik	382.189	432.665	331.713	0.766295	-0.384029	0.024568	0.126123	Down
2010320M18Rik	246.997	241.22	252.774	1.04839	0.0681822	0.772229	0.910687	Up
2010320O07Rik	11.795	14.5308	9.05907	0.622336	-0.684235	0.32455	0.621966	Down
2200002D01Rik	3.31018	2.99634	3.62402	1.2143	0.280124	0.847044	0.941976	Up
2210010C04Rik	4.08776	8.17552	0	0.0225308	-5.47196	0.162476	0.429849	Down
2210016F16Rik	484.976	436.934	533.018	1.22022	0.287135	0.0523387	0.213813	Up
2210016L21Rik	4603.49	4691.59	4515.39	0.962455	-0.055209	0.60721	0.827885	Down
2210406O10Rik	75.1396	76.4933	73.7859	0.965645	-0.0504347	0.8762	0.954462	Down
2210408F21Rik	272.831	231.41	314.253	1.35789	0.441366	0.0247897	0.126933	Up
2210408I21Rik	351.877	352.813	350.94	0.9945	-0.00795675	0.967586	0.989155	Down
2210416O15Rik	5.49254	5.66527	5.31981	0.941174	-0.0874664	0.939258	0.976722	Down
2210418O10Rik	22.2458	20.3647	24.127	1.18306	0.242518	0.720293	0.88715	Up
2300009A05Rik	311.078	310.527	311.629	1.00325	0.00468635	0.980215	0.995097	Up
2310001H17Rik	5.80738	5.31683	6.29793	1.18803	0.248577	0.80255	0.922999	Up
2310002F09Rik	175.544	169.402	181.686	1.07186	0.100118	0.635081	0.8443	Up
2310002L09Rik	2.99776	0.99216	5.00336	5.04447	2.3347	0.178418	0.452733	Up
2310009B15Rik	291.503	309.914	273.092	0.881062	-0.182684	0.308651	0.606544	Down
2310010J17Rik	74.3841	79.768	69.0001	0.864568	-0.209949	0.485858	0.753518	Down
2310011J03Rik	1292.69	1290.39	1294.99	1.00364	0.00524902	0.96471	0.987483	Up
2310015A10Rik	240.464	332.749	148.178	0.445371	-1.16692	4.13e-11	2.8e-09	Down
2310016G11Rik	1.66851	3.00588	0.331139	0.119543	-3.0644	0.144112	0.398762	Down
2310022A10Rik	790.177	798.41	781.943	0.979362	-0.0300864	0.803636	0.923157	Down
2310022B05Rik	4144.17	4544.68	3743.65	0.823767	-0.279692	0.0342762	0.159803	Down
2310026I22Rik	2.48809	1.65652	3.31966	2.00767	1.00552	0.515138	0.771876	Up
2310030G06Rik	41.8034	49.1955	34.4113	0.699169	-0.516287	0.190793	0.469215	Down
2310033P09Rik	525.57	517.994	533.146	1.02942	0.0418288	0.760756	0.906406	Up
2310034G01Rik	29.6022	27.8739	31.3305	1.12524	0.170231	0.725464	0.889741	Up
2310039H08Rik	137.258	133.719	140.797	1.05368	0.0754348	0.755211	0.903613	Up
2310040G24Rik	31.6756	37.266	26.0851	0.699446	-0.515715	0.308478	0.606383	Down
2310047D07Rik	13.4367	12.8625	14.0109	1.08881	0.122753	0.847853	0.942358	Up
2310057M21Rik	749.115	723.032	775.199	1.07214	0.10049	0.441524	0.722134	Up
2310061I04Rik	1544.22	1546.78	1541.65	0.996722	-0.00473708	0.96672	0.988778	Down
2310068J16Rik	9.82246	7.61707	12.0278	1.57969	0.659639	0.367947	0.662199	Up
2310069G16Rik	104.663	96.4451	112.881	1.17093	0.227651	0.389459	0.68088	Up
2410002F23Rik	2435.3	2271.1	2599.5	1.14463	0.194877	0.267904	0.562872	Up
2410003I16Rik	2.81478	3.61027	2.01928	0.557009	-0.844228	0.55086	0.793211	Down
2410004B18Rik	1334.15	1286.79	1381.52	1.07365	0.102518	0.386042	0.677846	Up
2410004I01Rik	21.452	20.162	22.742	1.12746	0.173075	0.743404	0.898026	Up
2410004P03Rik	86.9045	104.824	68.985	0.658038	-0.603757	0.0363845	0.166359	Down
2410006H16Rik	914.855	819.86	1009.85	1.23189	0.300873	0.0753167	0.269949	Up
2410018L13Rik	37.0943	50.8863	23.3024	0.458317	-1.12558	0.00452106	0.0360219	Down
2410022M11Rik	115.158	148.43	81.8864	0.551691	-0.858068	0.000901273	0.0100719	Down
2410080I02Rik	71.3063	48.6651	93.9475	1.932	0.950093	0.00177936	0.017267	Up
2410124H12Rik	3.70055	0.991771	6.40934	6.4519	2.68972	0.0518015	0.212445	Up
2500002B13Rik	22.2705	23.2986	21.2424	0.913784	-0.130075	0.826143	0.93291	Down
2500004C02Rik	259.912	281.701	238.122	0.845478	-0.242161	0.155966	0.418815	Down
2510002D24Rik	395.62	419.279	371.962	0.88717	-0.172717	0.25204	0.545922	Down
2510003B16Rik	8.98299	7.25949	10.7065	1.47333	0.559078	0.477933	0.748079	Up
2510009E07Rik	2599.01	2655.5	2542.53	0.957431	-0.0627602	0.576155	0.807617	Down
2510022D24Rik	293.035	299.025	287.044	0.959984	-0.0589181	0.779206	0.912871	Down
2510039O18Rik	999.007	942.971	1055.04	1.11888	0.162055	0.173799	0.446051	Up
2600006K01Rik	5.81685	5.97126	5.66243	0.949673	-0.0744973	0.938466	0.976301	Down
2600014E21Rik	40.2032	45.5004	34.906	0.765926	-0.384722	0.369052	0.663443	Down
2610001J05Rik	1190.77	1192.78	1188.75	0.99662	-0.00488408	0.963779	0.986987	Down
2610002M06Rik	2699.27	2961.34	2437.2	0.82296	-0.281107	0.00685684	0.0494398	Down
2610008E11Rik	902.437	895.181	909.694	1.01609	0.0230265	0.870322	0.952074	Up
2610017A05Rik	1.3094	2.29148	0.327314	0.156397	-2.67671	0.278609	0.574508	Down
2610020C07Rik	13.8462	17.249	10.4435	0.604368	-0.726501	0.298995	0.595888	Down
2610027K06Rik	3.79481	4.95963	2.62999	0.532703	-0.908597	0.481563	0.750846	Down
2610028E06Rik	6.32765	5.27672	7.37858	1.3959	0.481199	0.606867	0.827633	Up
2610035D17Rik	572.455	549.606	595.303	1.08325	0.115373	0.3775	0.671233	Up
2610035F20Rik	5.46782	6.913	4.02265	0.580568	-0.784463	0.433336	0.71586	Down
2610042L04Rik	42.249	47.2353	37.2627	0.787965	-0.343797	0.444424	0.723666	Down
2610044O15Rik8	356.753	401.33	312.176	0.77774	-0.36264	0.0234418	0.121976	Down
2610203C22Rik	11.2862	14.8499	7.72242	0.519019	-0.94614	0.222768	0.511803	Down
2610206C17Rik	2.82701	2.32166	3.33236	1.43719	0.523247	0.715267	0.885913	Up
2610300M13Rik	2.81966	4.96878	0.670544	0.134633	-2.8929	0.0721271	0.26268	Down
2610301B20Rik	2191.31	1895.66	2486.96	1.31199	0.391757	0.000534757	0.00662719	Up
2610306M01Rik	247.533	251.08	243.986	0.972054	-0.0408919	0.832335	0.935416	Down
2610307P16Rik	2.31712	2.63914	1.9951	0.756393	-0.402791	0.80851	0.925446	Down
2610316D01Rik	58.0857	61.6304	54.5411	0.884913	-0.176392	0.599325	0.822759	Down
2610318M16Rik	2.47287	2.61889	2.32686	0.887559	-0.172085	0.91632	0.967614	Down
2610318N02Rik	11.2654	9.86806	12.6627	1.282	0.358399	0.615633	0.832518	Up
2610507B11Rik	10438.3	10093.9	10782.7	1.06822	0.0952153	0.375801	0.66964	Up
2610507I01Rik	310.447	360.496	260.398	0.72222	-0.46949	0.0124574	0.0773363	Down
2610524H06Rik	592.987	609.79	576.185	0.944753	-0.0819909	0.59929	0.822759	Down
2610528A11Rik	5.29627	7.93456	2.65799	0.335648	-1.57498	0.126721	0.369813	Down
2700003A03Rik	5.63369	1.64659	9.6208	5.83744	2.54534	0.0277083	0.13756	Up
2700012I20Rik	5.76775	6.94162	4.59387	0.664326	-0.590036	0.605611	0.82677	Down
2700038G22Rik	9.68926	8.25243	11.1261	1.34505	0.427662	0.595198	0.820148	Up
2700046A07Rik	12.8032	9.61016	15.9963	1.66619	0.736556	0.291762	0.588403	Up
2700046G09Rik	91.9726	108.317	75.628	0.698079	-0.518537	0.10032	0.322151	Down
2700049A03Rik	185.62	176.245	194.995	1.106	0.145355	0.474519	0.745587	Up
2700054A10Rik	88.3627	104.631	72.0939	0.688874	-0.537688	0.0655523	0.247413	Down
2700062C07Rik	428.561	441.553	415.569	0.94131	-0.087258	0.582819	0.811542	Down
2700069I18Rik	8.35641	9.96852	6.7443	0.6754	-0.566185	0.510025	0.768895	Down
2700070H01Rik	4.15608	5.61406	2.69809	0.478973	-1.06198	0.394105	0.685054	Down
2700081O15Rik	2535.88	2384.14	2687.61	1.12737	0.172961	0.0914259	0.305152	Up
2700097O09Rik	134.928	108.384	161.472	1.48931	0.574649	0.0136773	0.0829432	Up
2810001G20Rik	369.79	387.447	352.134	0.909096	-0.137496	0.411278	0.698659	Down
2810002D19Rik	99.1728	114.103	84.2431	0.738108	-0.438096	0.0896869	0.301171	Down
2810004N23Rik	429.821	410.253	449.389	1.09545	0.131525	0.427869	0.711147	Up
2810006K23Rik	512.525	453.376	571.675	1.26118	0.334773	0.0182417	0.10256	Up
2810013P06Rik	755.975	831.457	680.492	0.818443	-0.289046	0.0190795	0.106043	Down
2810021J22Rik	328.1	380.074	276.126	0.726346	-0.461271	0.00339776	0.0289369	Down
2810025M15Rik	639.263	552.083	726.443	1.316	0.396162	0.00735311	0.0519098	Up
2810029C07Rik	256.998	307.51	206.485	0.671202	-0.575182	0.0111339	0.0709341	Down
2810032G03Rik	264.59	287.897	241.282	0.838156	-0.254709	0.17553	0.448584	Down
2810049E08Rik	78.7277	75.7756	81.6799	1.07766	0.107896	0.763626	0.907286	Up
2810403D21Rik	26.0571	36.8698	15.2444	0.41455	-1.27038	0.0218745	0.116378	Down
2810407A14Rik	43.6797	58.7495	28.61	0.486314	-1.04004	0.0220627	0.117191	Down
2810408A11Rik	8.0109	7.29005	8.73175	1.19679	0.259173	0.751712	0.901959	Up
2810408I11Rik	5.66159	4.2834	7.03979	1.64028	0.713939	0.465825	0.738593	Up
2810410L24Rik	103.372	120.445	86.2994	0.715928	-0.482114	0.0622094	0.239766	Down
2810414N06Rik	54.7676	57.6189	51.9163	0.901896	-0.148966	0.676472	0.865562	Down
2810429I04Rik	19.4643	24.2949	14.6337	0.602214	-0.731651	0.247628	0.541528	Down
2810433D01Rik	3.99537	6.66619	1.32456	0.199552	-2.32517	0.113655	0.346497	Down
2810454H06Rik	6.3072	8.60768	4.00673	0.465573	-1.10292	0.237387	0.528741	Down
2810459M11Rik	623.301	596.604	649.997	1.08962	0.123819	0.605511	0.826748	Up
2900005J15Rik	17.3127	16.1996	18.4257	1.13668	0.184823	0.774181	0.911317	Up
2900009J06Rik	39.1869	37.6742	40.6995	1.07885	0.109493	0.808649	0.925452	Up
2900024J01Rik	2.98881	4.96002	1.0176	0.203595	-2.29623	0.132479	0.380096	Down
2900026A02Rik	3780.08	3715.75	3844.4	1.0346	0.0490759	0.718321	0.88651	Up
2900040C04Rik	46.6428	45.0729	48.2128	1.07011	0.0977617	0.944885	0.978411	Up
2900041M22Rik	36.8107	37.0436	36.5778	0.988388	-0.0168507	0.96765	0.98917	Down
2900052L18Rik	106.019	138.154	73.8832	0.53454	-0.903629	0.000340629	0.00452795	Down
2900052N01Rik	1982.81	2477.34	1488.27	0.600693	-0.735299	8.83e-05	0.00145795	Down
2900060N12Rik	158.305	167.894	148.715	0.885202	-0.175921	0.44488	0.723991	Down
2900076A07Rik	143.145	129.276	157.015	1.21524	0.281246	0.251522	0.545302	Up
2900079G21Rik	322.628	322.148	323.108	1.00257	0.00370558	0.984743	0.996684	Up
2900089D17Rik	22.5731	19.9565	25.1898	1.26251	0.336293	0.552587	0.794321	Up
2900092D14Rik	453.121	513.038	393.204	0.766425	-0.383783	0.0152798	0.0900569	Down
2900093K20Rik	58.2843	62.582	53.9865	0.86332	-0.212033	0.509502	0.768531	Down
3010001F23Rik	21.5774	25.4678	17.6871	0.694624	-0.525696	0.291664	0.588323	Down
3010003L21Rik	1.66427	2.31095	1.0176	0.437586	-1.19236	0.511382	0.769531	Down
3100003L05Rik	4.16192	4.65208	3.67177	0.79026	-0.3396	0.76296	0.907081	Down
3110006O06Rik	5.99844	6.31853	5.67834	0.899803	-0.152319	0.875873	0.954359	Down
3110009E18Rik	54.4869	51.0935	57.8803	1.13315	0.180337	0.64087	0.847429	Up
3110021A11Rik	2.46943	1.64659	3.29227	2.00216	1.00156	0.533313	0.783176	Up
3110039M20Rik	149.807	182.503	117.11	0.64194	-0.639489	0.0056941	0.0430257	Down
3110040N11Rik	318.784	328.361	309.207	0.941491	-0.0869802	0.59405	0.819418	Down
3110045C21Rik	30.9278	30.7564	31.0993	1.01082	0.015523	0.971022	0.991243	Up
3110056K07Rik	162.57	163.666	161.475	0.986772	-0.0192112	0.922995	0.97011	Down
3110070M22Rik	40.6038	41.0305	40.177	0.980394	-0.0285663	0.946201	0.978959	Down
3110082I17Rik	261.588	237.116	286.06	1.20654	0.27088	0.206066	0.49106	Up
3110082J24Rik	54.7853	52.6945	56.8761	1.07942	0.110256	0.779426	0.912871	Up
3110083C13Rik	11.0997	8.57068	13.6288	1.59023	0.669234	0.38159	0.673834	Up
3300002A11Rik	11.2222	18.7611	3.68324	0.195899	-2.35182	0.00335367	0.0286226	Down
3300002I08Rik	442.907	437.476	448.338	1.02496	0.0355716	0.812675	0.926493	Up
3300002P13Rik	134.703	153.819	115.586	0.750977	-0.41316	0.0947809	0.311702	Down
3425401B19Rik	4.31057	4.62268	3.99847	0.865155	-0.20897	0.853125	0.944555	Down
3632454L22Rik	19.9268	22.0188	17.8347	0.80807	-0.307448	0.636864	0.845259	Down
3830403N18Rik	2.96218	3.9369	1.98745	0.505355	-0.984632	0.474726	0.745795	Down
3830406C13Rik	941.175	1034.65	847.698	0.819206	-0.287702	0.0202457	0.110137	Down
3830408C21Rik	54.7354	61.4211	48.0497	0.782224	-0.354347	0.332623	0.630494	Down
3930402G23Rik	8.29501	4.60165	11.9884	2.6009	1.37901	0.102046	0.325379	Up
4430402I18Rik	177.792	218.487	137.097	0.627384	-0.672579	0.0031469	0.0272909	Down
4631405J19Rik	1.66933	0.66475	2.67391	4.03217	2.01156	0.284133	0.581059	Up
4632404H12Rik	316.583	304.945	328.221	1.07653	0.106395	0.510167	0.768895	Up
4632427E13Rik	12.5878	12.1778	12.9977	1.06656	0.0929597	0.888933	0.95932	Up
4632428C04Rik	12.7641	9.54143	15.9868	1.674	0.743303	0.281867	0.578211	Up
4732414G09Rik	22.7067	25.8376	19.5757	0.756208	-0.403146	0.494601	0.758986	Down
4732416N19Rik	12.0566	15.1738	8.9394	0.590308	-0.760461	0.279995	0.576317	Down
4732419C18Rik	6.34976	4.9497	7.74981	1.56203	0.643426	0.510214	0.768895	Up
4732471J01Rik	114.312	103.731	124.893	1.20436	0.268265	0.276854	0.573027	Up
4732491K20Rik	74.2068	85.3394	63.0742	0.739223	-0.435918	0.140078	0.392258	Down
4831440E17Rik	62.4372	72.6587	52.2156	0.719167	-0.475601	0.139828	0.392026	Down
4833407H14Rik	1.337	0.32741	2.3466	6.6001	2.72249	0.211591	0.498379	Up
4833411C07Rik	6.41865	6.56417	6.27314	0.956475	-0.0642004	0.950927	0.980663	Down
4833412C05Rik	3.32323	3.32297	3.32348	1.00205	0.00295633	0.998395	0.999363	Up
4833415N18Rik	8.67164	6.27765	11.0656	1.76086	0.816277	0.319129	0.617562	Up
4833417C18Rik	3.81907	4.96041	2.67773	0.539392	-0.890593	0.473672	0.744962	Down
4833418N02Rik	10.4484	15.1861	5.71079	0.375092	-1.41468	0.0673667	0.251274	Down
4833419F23Rik	3.80527	5.9625	1.64805	0.277794	-1.84791	0.186405	0.464216	Down
4833420G17Rik	571.097	562.576	579.618	1.03016	0.0428683	0.74358	0.898026	Up
4833422C13Rik	295.459	176.061	414.856	2.3566	1.23671	1.29e-05	0.00027989	Up
4833438C02Rik	33.2994	32.0358	34.5629	1.07968	0.1106	0.80135	0.922243	Up
4833439F03Rik	43.2664	55.5296	31.0032	0.558527	-0.840302	0.0230783	0.120913	Down
4833439L19Rik	6598.36	6074.68	7122.04	1.17243	0.229502	0.0470377	0.199275	Up
4833447I15Rik	4.78825	5.26602	4.31048	0.819183	-0.287743	0.790677	0.917737	Down
4921504A21Rik	50.755	54.874	46.6359	0.850335	-0.233897	0.482705	0.751263	Down
4921507P07Rik	11.7339	9.89824	13.5695	1.37257	0.456878	0.534487	0.784044	Up
4921524J17Rik	537.196	480.81	593.582	1.23458	0.304015	0.0637105	0.243182	Up
4921531C22Rik	67.2462	70.996	63.4964	0.893903	-0.16181	0.58927	0.816538	Down
4921536K21Rik	12.274	10.532	14.0159	1.32925	0.410617	0.543254	0.788252	Up
4922502B01Rik	115.683	91.3717	139.994	1.53155	0.614991	0.0570901	0.226302	Up
4930402H24Rik	3307.62	3499.02	3116.22	0.890597	-0.167155	0.126196	0.368967	Down
4930404N11Rik	26.9441	26.0488	27.8395	1.06712	0.0937266	0.850924	0.943485	Up
4930405A21Rik	5.79304	4.33421	7.25187	1.6801	0.748549	0.503067	0.764842	Up
4930407I02Rik	3.1618	4.32467	1.99893	0.462995	-1.11093	0.442537	0.722603	Down
4930412C18Rik	46.3898	54.3755	38.404	0.706576	-0.501083	0.188779	0.466973	Down
4930413F20Rik	2.4968	2.62726	2.36634	0.896721	-0.157268	0.920155	0.969475	Down
4930413G21Rik	19.3915	18.1908	20.5922	1.13346	0.180736	0.742526	0.897883	Up
4930414N06Rik	2.66051	4.31552	1.00551	0.232728	-2.10328	0.191895	0.470768	Down
4930415O20Rik	2.00279	2.32127	1.68432	0.724215	-0.465509	0.781995	0.913944	Down
4930417H01Rik	3.5044	4.00758	3.00122	0.750823	-0.413455	0.742574	0.897883	Down
4930425L21Rik	1.16121	0	2.32241	12.7414	3.67145	0.132057	0.379324	Up
4930426D05Rik	5.49236	5.95978	5.02495	0.842679	-0.246945	0.815629	0.927506	Down
4930426I24Rik	14.9959	16.4708	13.5211	0.81827	-0.289352	0.679293	0.867109	Down
4930426L09Rik	18.1674	14.5098	21.8249	1.50147	0.586378	0.316837	0.61516	Up
4930429B21Rik	244.471	212.727	276.215	1.29859	0.376951	0.0656635	0.247486	Up
4930430F08Rik	746.07	778.922	713.219	0.915672	-0.127097	0.301895	0.598689	Down
4930432K21Rik	67.579	79.78	55.3779	0.694358	-0.526249	0.134179	0.383152	Down
4930439D14Rik	1.81437	2.63914	0.989593	0.376314	-1.40999	0.473652	0.744962	Down
4930444P10Rik	10.648	8.25126	13.0448	1.57959	0.659552	0.371502	0.665228	Up
4930445E18Rik	7.1497	9.23115	5.06825	0.546833	-0.870829	0.355621	0.651803	Down
4930445K14Rik	50.5542	46.9831	54.1253	1.15205	0.204202	0.555277	0.795714	Up
4930447C04Rik	30.0559	33.1345	26.9773	0.815053	-0.295035	0.508546	0.767987	Down
4930447F24Rik	9.30558	4.64176	13.9694	3.01417	1.59176	0.0719438	0.262313	Up
4930447K03Rik	4.16171	2.64829	5.67513	2.14406	1.10035	0.327155	0.624592	Up
4930447M23Rik	300.122	341.793	258.451	0.756205	-0.403151	0.18867	0.466861	Down
4930447N08Rik	8.16953	9.67051	6.66855	0.690909	-0.533432	0.548317	0.791496	Down
4930448E22Rik	5.48878	5.96211	5.01545	0.841244	-0.249404	0.836223	0.936861	Down
4930451E10Rik	2.33699	3.3329	1.34109	0.402326	-1.31356	0.412705	0.699531	Down
4930452G13Rik	18.6211	22.1456	15.0966	0.680716	-0.554876	0.321904	0.619792	Down
4930453N24Rik	952.944	879.446	1026.44	1.16723	0.223085	0.0819055	0.284646	Up
4930455C13Rik	3.63051	2.63914	4.62188	1.75351	0.810243	0.565921	0.801767	Up
4930467D21Rik	1.99626	2.97492	1.0176	0.339815	-1.55718	0.361565	0.656607	Down
4930467E23Rik	17.3182	14.8028	19.8337	1.33688	0.418874	0.522573	0.776676	Up
4930470G03Rik	14.4067	15.5203	13.2932	0.857322	-0.22209	0.717291	0.886324	Down
4930473A02Rik	81.2369	84.333	78.1408	0.926576	-0.110019	0.687281	0.871388	Down
4930473H19Rik	2.33777	2.01372	2.66182	1.32795	0.409204	0.798739	0.921202	Up
4930474G06Rik	2.18718	2.65822	1.71615	0.641828	-0.639741	0.721682	0.887898	Down
4930479D17Rik	12.6211	18.1503	7.09197	0.38915	-1.3616	0.066179	0.248507	Down
4930480K23Rik	162.996	189.43	136.562	0.721269	-0.47139	0.0249389	0.127566	Down
4930481A15Rik	51.9948	55.2816	48.708	0.881489	-0.181985	0.585659	0.814391	Down
4930481B07Rik	22.957	21.7705	24.1435	1.10737	0.14714	0.778098	0.912871	Up
4930484H19Rik	1.82096	2.95545	0.686459	0.229225	-2.12516	0.281915	0.578211	Down
4930486L24Rik	4.65519	2.33042	6.97995	3.00524	1.58748	0.180725	0.456122	Up
4930488L21Rik	4.98098	4.64215	5.31981	1.14815	0.199317	0.844444	0.940704	Up
4930500A05Rik	1.81978	2.31056	1.329	0.57594	-0.796009	0.625478	0.839156	Down
4930500F10Rik	22.3708	24.7137	20.028	0.809918	-0.304153	0.579636	0.809189	Down
4930502C15Rik	5.16169	3.65038	6.67299	1.83056	0.872288	0.39743	0.687472	Up
4930503B20Rik	3.99755	2.6479	5.3472	2.01987	1.01426	0.380672	0.673349	Up
4930503L19Rik	361.898	337.295	386.5	1.14582	0.196382	0.21381	0.501435	Up
4930505A04Rik	2.64915	2.62882	2.66947	1.01412	0.0202245	0.98912	0.997333	Up
4930506C21Rik	49.2442	63.413	35.0754	0.553375	-0.853671	0.0307699	0.148861	Down
4930507D05Rik	37.7232	37.9072	37.5392	0.990621	-0.0135942	0.976902	0.993606	Down
4930509G22Rik	3.97404	5.28626	2.66182	0.504069	-0.988306	0.383286	0.675307	Down
4930511M06Rik	1.66516	0.991381	2.33895	2.35864	1.23796	0.535094	0.784297	Up
4930512B01Rik	9.47956	12.2906	6.66855	0.543276	-0.880243	0.264449	0.559078	Down
4930513N10Rik	30.5249	28.4164	32.6333	1.1489	0.200254	0.649118	0.850576	Up
4930517G24Rik	15.1871	19.4385	10.9357	0.563332	-0.827944	0.22114	0.509916	Down
4930519F16Rik	6.67203	6.28835	7.0557	1.12054	0.164196	0.85354	0.944557	Up
4930519K11Rik	9.29297	6.25818	12.3278	1.96825	0.97691	0.206607	0.491944	Up
4930520E11Rik	19.2009	14.5194	23.8825	1.64597	0.718938	0.223222	0.512448	Up
4930520O04Rik	9.00269	11.6361	6.36924	0.547251	-0.869726	0.292911	0.589287	Down
4930522L14Rik	62.761	68.8063	56.7157	0.824454	-0.278488	0.429035	0.71197	Down
4930523C07Rik	60.9403	63.6868	58.1938	0.914181	-0.129448	0.695076	0.875192	Down
4930524B15Rik	2.83551	2.63797	3.03305	1.14603	0.196643	0.882558	0.957355	Up
4930524J08Rik	13.482	14.2618	12.7022	0.891027	-0.16646	0.796071	0.919924	Down
4930525G20Rik	27.3794	36.9526	17.8061	0.480812	-1.05645	0.0353336	0.163166	Down
4930526I15Rik	173.997	190.351	157.644	0.828286	-0.2718	0.186731	0.46468	Down
4930527J03Rik	1.80729	2.62882	0.985768	0.376744	-1.40834	0.447172	0.726003	Down
4930528A17Rik	12.1775	9.90856	14.4464	1.45564	0.541653	0.433014	0.715685	Up
4930534D22Rik	4.32011	4.98942	3.6508	0.733592	-0.44695	0.718737	0.886564	Down
4930538E20Rik	5.8641	4.28534	7.44285	1.73139	0.791929	0.455465	0.732093	Up
4930539J05Rik	20.2918	17.1653	23.4182	1.36308	0.446865	0.398262	0.687809	Up
4930543I03Rik	2.31937	0.991771	3.64697	3.68201	1.88049	0.248704	0.542854	Up
4930549G23Rik	8.17296	8.32038	8.02555	0.96549	-0.0506667	0.956386	0.983312	Down
4930550C14Rik	14.1168	14.9671	13.2664	0.888571	-0.170441	0.80963	0.925697	Down
4930553P18Rik	24.0827	22.8596	25.3057	1.10826	0.148291	0.763021	0.907081	Up
4930555F03Rik	1.4878	2.64829	0.327314	0.135517	-2.88346	0.170467	0.441428	Down
4930555G01Rik	3.99272	4.64098	3.34445	0.72068	-0.472569	0.682909	0.868661	Down
4930556I23Rik	20.7556	23.4835	18.0277	0.767722	-0.381345	0.496553	0.760517	Down
4930556M19Rik	4.32646	4.94931	3.7036	0.746068	-0.422621	0.703541	0.88056	Down
4930557K07Rik	2.34284	3.68017	1.00551	0.273282	-1.87154	0.273209	0.569092	Down
4930563E22Rik	79.5501	89.2232	69.8771	0.782811	-0.353263	0.212355	0.499528	Down
4930570G19Rik	182.515	254.933	110.097	0.431575	-1.21232	3.79e-09	1.89e-07	Down
4930577N17Rik	19.3269	24.0596	14.5942	0.607316	-0.719481	0.206269	0.491367	Down
4930578G10Rik	73.8738	84.0798	63.6679	0.757554	-0.400578	0.259301	0.554218	Down
4930578L24Rik	19.8737	19.7457	20.0018	1.01224	0.0175461	0.974641	0.99274	Up
4930578M01Rik	21.9452	23.7803	20.11	0.844609	-0.243644	0.637385	0.845402	Down
4930579G18Rik	6.2809	5.25453	7.30726	1.38967	0.474747	0.625338	0.839094	Up
4930579G24Rik	47.3966	53.4269	41.3663	0.774027	-0.369545	0.334688	0.632158	Down
4930579K19Rik	22.3562	25.2539	19.4586	0.770364	-0.376387	0.495647	0.759771	Down
4930581F22Rik	36.6968	44.7019	28.6916	0.64212	-0.639085	0.13869	0.390211	Down
4930586N03Rik	2.1379	2.96655	1.30926	0.44327	-1.17374	0.563294	0.80046	Down
4930590J08Rik	24.904	24.5062	25.3019	1.03359	0.0476664	0.920651	0.969475	Up
4930592C13Rik	2.83112	1.65613	4.00612	2.42075	1.27546	0.375122	0.669166	Up
4930594M22Rik	17.5358	20.7291	14.3426	0.69143	-0.532345	0.38183	0.674019	Down
4930597O21Rik	5.99499	4.95846	7.03152	1.41704	0.502882	0.588117	0.815985	Up
4930599N23Rik	6.48638	8.92594	4.04683	0.451743	-1.14643	0.223904	0.513229	Down
4931403E22Rik	42.2033	47.9435	36.463	0.76013	-0.395681	0.283069	0.5798	Down
4931403G20Rik	2.50339	3.30272	1.70406	0.512482	-0.964427	0.533231	0.783148	Down
4931406C07Rik	795.449	801.91	788.988	0.984021	-0.0232387	0.875507	0.954296	Down
4931408D14Rik	5.80274	3.96708	7.6384	1.9277	0.946883	0.321016	0.619171	Up
4931414P19Rik	155.71	164.631	146.79	0.892112	-0.164704	0.461413	0.735773	Down
4931415C17Rik	28.3571	26.7763	29.9379	1.11897	0.162176	0.722199	0.888041	Up
4931428F04Rik	821.617	798.137	845.098	1.05887	0.0825216	0.500796	0.763243	Up
4931440J10Rik	6.14648	7.62778	4.66519	0.612394	-0.707467	0.444939	0.723991	Down
4931440P22Rik	24.3124	20.4898	28.135	1.37196	0.456243	0.338929	0.636052	Up
4932438A13Rik	3771.75	3699.32	3844.19	1.03912	0.0553656	0.713736	0.885313	Up
4932438H23Rik	54.267	52.1372	56.3968	1.0826	0.114496	0.771133	0.910052	Up
4932441J04Rik	22.1736	21.409	22.9382	1.0715	0.0996356	0.852479	0.944178	Up
4932702P03Rik	18.4669	22.2079	14.7259	0.66296	-0.593007	0.284227	0.581155	Down
4933403O08Rik	2.67805	1.34936	4.00673	2.98996	1.58013	0.332925	0.63082	Up
4933404O12Rik	496.533	539.103	453.962	0.842029	-0.248058	0.109802	0.339954	Down
4933405L10Rik	3.50331	4.32506	2.68156	0.620067	-0.689504	0.584144	0.813022	Down
4933406B17Rik	10.5037	9.60178	11.4057	1.18699	0.247311	0.734677	0.893923	Up
4933406C10Rik	13.9706	15.8771	12.0641	0.759102	-0.397635	0.526647	0.779436	Down
4933406I18Rik	8.10308	8.23218	7.97398	0.968844	-0.0456643	0.95666	0.983441	Down
4933407K13Rik	34.989	23.1175	46.8606	2.0254	1.01821	0.0137902	0.0834751	Up
4933407L21Rik	66.663	77.1847	56.1414	0.727454	-0.459072	0.139259	0.390927	Down
4933407O12Rik	62.3473	36.1351	88.5594	2.45341	1.29479	0.000512806	0.00640702	Up
4933408J17Rik	3.30945	4.2723	2.3466	0.547932	-0.867931	0.522258	0.776548	Down
4933412E12Rik	184.346	205.996	162.696	0.789447	-0.341086	0.131153	0.377543	Down
4933412O06Rik	66.4168	84.537	48.2966	0.570487	-0.809733	0.0121266	0.0757313	Down
4933417D19Rik	13.6712	11.9536	15.3888	1.28821	0.365367	0.590408	0.816914	Up
4933417O13Rik	1.97773	3.29318	0.662278	0.201754	-2.30933	0.227054	0.516876	Down
4933421O10Rik	307.713	316.461	298.965	0.944659	-0.0821342	0.636592	0.845172	Down
4933424G06Rik	8.42608	10.1951	6.65708	0.652799	-0.61529	0.464842	0.738294	Down
4933424M12Rik	5.31967	7.33055	3.3088	0.45318	-1.14185	0.307597	0.605489	Down
4933426B08Rik	1.35184	0.33734	2.36634	6.64958	2.73326	0.252959	0.547209	Up
4933427D14Rik	850.636	693.528	1007.74	1.45295	0.538989	0.000323475	0.0043362	Up
4933427I22Rik	6.6263	7.58573	5.66687	0.746936	-0.420944	0.635374	0.844575	Down
4933428G20Rik	9.11721	10.9278	7.30665	0.669778	-0.578246	0.482019	0.750934	Down
4933430I17Rik	6.93914	7.23009	6.6482	0.919242	-0.121483	0.895421	0.961665	Down
4933431E20Rik	3703.76	4482.45	2925.07	0.652522	-0.615902	3.33e-07	1.14e-05	Down
4933432I09Rik	10.1906	7.62623	12.755	1.67218	0.741727	0.335382	0.632571	Up
4933433G19Rik	7.99991	7.93417	8.06565	1.01482	0.0212199	0.979404	0.994748	Up
4933434E20Rik	2007.94	1985.87	2030	1.02225	0.0317507	0.768664	0.909276	Up
4933439C10Rik	166.372	205.308	127.435	0.620811	-0.687773	0.000587335	0.00714464	Down
4933440N22Rik	15.0718	13.9046	16.239	1.17017	0.226713	0.719676	0.887063	Up
5031425E22Rik	496.148	480.874	511.422	1.06331	0.0885657	0.54699	0.790555	Up
5031425F14Rik	9.25207	1.63666	16.8675	10.2519	3.35782	0.00548935	0.04186	Up
5031426D15Rik	2.84429	1.6462	4.04239	2.44757	1.29135	0.361812	0.656835	Up
5031434O11Rik	78.1483	101.826	54.4704	0.534752	-0.903059	0.00106835	0.0114813	Down
5031439G07Rik	5299.99	4874.31	5725.67	1.17465	0.232225	0.0166538	0.0958574	Up
5033403F01Rik	7.44239	4.94815	9.93664	2.00985	1.00709	0.261707	0.556836	Up
5033406O09Rik	12.2616	3.65077	20.8724	5.73372	2.51947	0.00199541	0.018975	Up
5033417F24Rik	91.0586	84.3712	97.7459	1.15894	0.21281	0.404212	0.692642	Up
5033421B08Rik	31.9053	17.1811	46.6295	2.71227	1.4395	0.00882868	0.05969	Up
5033426O07Rik	4.28416	5.2557	3.31262	0.630875	-0.664574	0.565696	0.801767	Down
5033430I15Rik	95.3532	78.5317	112.175	1.42979	0.515806	0.0683123	0.253471	Up
5330413P13Rik	50.5023	49.4647	51.54	1.04225	0.0596996	0.870671	0.952074	Up
5330416C01Rik	59.6549	17.2078	102.102	5.93869	2.57015	1.65e-10	1.03e-08	Up
5330429C05Rik	13.3768	8.98629	17.7673	1.97968	0.985266	0.15553	0.418233	Up
5330434G04Rik	147.663	135.908	159.418	1.17273	0.229868	0.345922	0.642427	Up
5330439A09Rik	2.34975	1.66645	3.03305	1.8213	0.864972	0.564298	0.800857	Up
5330439K02Rik	10.1115	11.9421	8.28094	0.69542	-0.524045	0.491392	0.757038	Down
5430400D12Rik	29.319	42.5984	16.0396	0.376307	-1.41002	0.00250888	0.0228323	Down
5430402O13Rik	10.4469	13.2311	7.66258	0.57957	-0.786944	0.273716	0.569851	Down
5430403G16Rik	32.2159	35.7542	28.6776	0.80258	-0.317283	0.44218	0.722592	Down
5430405H02Rik	139.951	128.994	150.907	1.17041	0.227015	0.330882	0.628666	Up
5430416N02Rik	208.76	172.403	245.118	1.4222	0.50812	0.0179662	0.101441	Up
5430421F17Rik	3.97762	5.30612	2.64911	0.500428	-0.998764	0.492172	0.757478	Down
5530601H04Rik	245.558	291.065	200.052	0.687295	-0.540998	0.00844723	0.0577948	Down
5730405A17Rik	8.9723	5.95179	11.9928	2.01598	1.01148	0.211304	0.498296	Up
5730405O15Rik	13.0809	13.8264	12.3354	0.891611	-0.165514	0.8069	0.924847	Down
5730408K05Rik	25.1458	33.4539	16.8376	0.504746	-0.986369	0.0865855	0.294895	Down
5730409E04Rik	3197.33	3703.16	2691.51	0.726779	-0.460411	5.75e-05	0.00101437	Down
5730435O14Rik	2.14657	0.654431	3.63871	5.54223	2.47047	0.220905	0.509612	Up
5730455P16Rik	3206.33	3470.16	2942.5	0.847893	-0.238046	0.0414035	0.182111	Down
5730480H06Rik	14.1363	14.5285	13.744	0.944682	-0.0820991	0.894627	0.961486	Down
5730507C01Rik	3.1357	4.25594	2.01546	0.472134	-1.08273	0.493478	0.75849	Down
5730522E02Rik	46.0029	52.1352	39.8705	0.763815	-0.388705	0.305593	0.603156	Down
5830408C22Rik	13.7817	9.83632	17.7272	1.7979	0.846313	0.24164	0.533817	Up
5830411N06Rik	3.32778	1.32872	5.32685	4.01887	2.00679	0.169756	0.440291	Up
5830418P13Rik	2.33399	3.65038	1.0176	0.277	-1.85204	0.255206	0.549711	Down
5830433I10Rik	21.8389	26.6009	17.077	0.642112	-0.639103	0.260702	0.555534	Down
5830444B04Rik	5.62872	3.61904	7.6384	2.10937	1.07681	0.281673	0.578071	Up
5830448L01Rik	117.095	130.457	103.733	0.795155	-0.330693	0.185873	0.463323	Down
5830454E08Rik	20.7942	17.513	24.0754	1.37407	0.458452	0.383857	0.675684	Up
5930403L14Rik	1014.84	1188.52	841.157	0.707778	-0.498631	0.000173505	0.00257899	Down
5930403N24Rik	11.9277	15.8699	7.98546	0.503748	-0.989225	0.148243	0.405676	Down
5930430L01Rik	55.8128	65.0158	46.6099	0.717106	-0.479742	0.204951	0.489399	Down
5930438M14Rik	2.84976	3.00588	2.69365	0.896302	-0.157943	0.910408	0.965561	Down
6030407O03Rik	8.93761	8.95495	8.92027	0.998846	-0.0016665	0.998494	0.999363	Down
6030442K20Rik	11.7779	13.2002	10.3556	0.784016	-0.351045	0.601599	0.824078	Down
6030443J06Rik	8.29937	7.25949	9.33925	1.28608	0.362986	0.662784	0.85859	Up
6030458C11Rik	1387.83	1406.26	1369.39	0.97374	-0.0383916	0.729835	0.89169	Down
6030498E09Rik	2.33222	3.32336	1.34109	0.403271	-1.31018	0.417735	0.703697	Down
6230400D17Rik	17.6157	23.187	12.0444	0.519259	-0.945474	0.0988244	0.319286	Down
6330403K07Rik	8956.56	7964.18	9948.93	1.24922	0.321028	0.0431199	0.187415	Up
6330409D20Rik	34.8695	39.8503	29.8887	0.749726	-0.415564	0.436609	0.718406	Down
6330410L21Rik	4.31674	5.97165	2.66182	0.4466	-1.16294	0.301898	0.598689	Down
6330415G19Rik	36.1708	49.0246	23.317	0.476099	-1.07067	0.0108782	0.0697101	Down
6330418K02Rik	93.0065	96.3092	89.7039	0.931832	-0.101859	0.705768	0.881649	Down
6330420H09Rik	167.736	251.647	83.8244	0.332987	-1.58646	0.0101666	0.0663645	Down
6330525I24Rik	2.98857	4.63222	1.34491	0.28942	-1.78876	0.194923	0.474858	Down
6330537M06Rik	2.0015	0.32741	3.67559	10.3436	3.37067	0.0792525	0.278381	Up
6430411K18Rik	13.549	10.1725	16.9255	1.66248	0.733333	0.319356	0.61782	Up
6430503K07Rik	2.48511	2.32049	2.64973	1.14511	0.195491	0.892075	0.960018	Up
6430548M08Rik	9985.84	7796.24	12175.4	1.56171	0.643127	6.83e-09	3.16e-07	Up
6430550D23Rik	10.9538	7.95403	13.9535	1.75674	0.812898	0.316542	0.614887	Up
6430562O15Rik	2.49783	2.64907	2.3466	0.885213	-0.175904	0.908711	0.965386	Down
6430571L13Rik	67.6608	82.9023	52.4193	0.63214	-0.661683	0.024233	0.124757	Down
6430573P05Rik	23.636	28.8642	18.4079	0.637725	-0.648994	0.243115	0.535493	Down
6430584L05Rik	46.8125	53.5856	40.0394	0.747308	-0.420224	0.386495	0.67826	Down
6430590A07Rik	3.15152	3.28208	3.02096	0.917365	-0.124433	0.923416	0.970162	Down
6430590A10Rik	7.33927	7.61902	7.05953	0.925504	-0.111689	0.904872	0.964889	Down
6430628N08Rik	9.18991	0.66475	17.7151	26.765	4.74228	0.000144711	0.00220873	Up
6530402F18Rik	520.136	481.79	558.481	1.15887	0.212721	0.359126	0.65491	Up
6530403H02Rik	73.118	50.6144	95.6217	1.88916	0.917745	0.00699443	0.050199	Up
6530409C15Rik	6.99817	5.64346	8.35287	1.48172	0.567269	0.514296	0.771317	Up
6530411M01Rik	22.8198	27.5851	18.0545	0.654868	-0.610724	0.254036	0.548321	Down
6720468P15Rik	3.97454	4.31357	3.6355	0.84559	-0.241971	0.844109	0.940704	Down
6720473M11Rik	3.02211	2.32088	3.72334	1.6009	0.678885	0.616063	0.832616	Up
6720483E21Rik	7.31053	7.90477	6.7163	0.847568	-0.238599	0.78513	0.915644	Down
6720489N17Rik	84.4402	87.9972	80.8833	0.919081	-0.121737	0.740908	0.897141	Down
6820408C15Rik	77.384	64.2535	90.5146	1.41005	0.495744	0.108049	0.336252	Up
7530428D23Rik	12.332	12.2803	12.3838	1.00875	0.0125636	0.985432	0.996847	Up
8030423F21Rik	1.81226	2.63875	0.985768	0.375661	-1.4125	0.434877	0.716783	Down
8030442B05Rik	1.67626	0.654431	2.69809	4.09903	2.03528	0.324257	0.6217	Up
8030443G20Rik	1.17037	2.34074	0	0.0787879	-3.66588	0.17356	0.446051	Down
8030453O22Rik	118.648	77.3406	159.956	2.06923	1.04909	5.69e-05	0.00100333	Up
8030462N17Rik	1262.63	1127.15	1398.1	1.24046	0.31088	0.00699531	0.050199	Up
8430426J06Rik	10.6664	8.33186	13.0009	1.56401	0.645253	0.415607	0.701596	Up
8430429K09Rik	225.21	230.924	219.496	0.950077	-0.0738841	0.716505	0.886088	Down
8430432A02Rik	14.6599	18.4968	10.823	0.583109	-0.778163	0.264154	0.558969	Down
9030025P20Rik	46.1623	27.8911	64.4335	2.31119	1.20863	0.00557726	0.0423518	Up
9030607L20Rik	14.2878	6.25779	22.3178	3.56242	1.83286	0.00742596	0.0523367	Up
9030612E09Rik	39.7017	32.4955	46.9079	1.44542	0.531492	0.20585	0.490838	Up
9030624G23Rik	26.7816	27.6543	25.9088	0.937051	-0.0938006	0.866233	0.950324	Down
9130008F23Rik	1.98506	2.9646	1.00551	0.338391	-1.56323	0.364945	0.659145	Down
9130019O22Rik	96.8417	107.011	86.6725	0.809323	-0.305212	0.240483	0.532346	Down
9130019P16Rik	22.4189	21.5455	23.2922	1.08227	0.11406	0.843717	0.940704	Up
9130023H24Rik	92.4827	98.0864	86.8791	0.886128	-0.174413	0.511538	0.769665	Down
9130024F11Rik	141.757	195.87	87.6445	0.447314	-1.16064	3.66e-05	0.000695988	Down
9130401M01Rik	1145.28	1084.83	1205.74	1.11154	0.152555	0.172191	0.444225	Up
9230009I02Rik	11.9694	14.9083	9.03045	0.605649	-0.723446	0.306969	0.604888	Down
9230102K24Rik	2.81621	4.31552	1.31691	0.307012	-1.70363	0.266018	0.560663	Down
9230110K08Rik	4.63373	7.26027	2.00719	0.2761	-1.85674	0.101876	0.324957	Down
9230112J17Rik	3.82996	2.30063	5.35929	2.32291	1.21593	0.312208	0.61016	Up
9230114K14Rik	29.2016	35.0238	23.3793	0.667372	-0.583436	0.236236	0.527503	Down
9230116N13Rik	6.95454	7.26027	6.64881	0.91641	-0.125934	0.884823	0.957943	Down
9330020H09Rik	58.2383	60.0392	56.4375	0.939464	-0.0900904	0.777354	0.91246	Down
9330102E08Rik	832.788	902.105	763.471	0.846285	-0.240785	0.0691125	0.255535	Down
9330104G04Rik	135.329	169.959	100.699	0.592241	-0.755744	0.00314142	0.0272791	Down
9330117O12Rik	21.82	21.8304	21.8096	0.99795	-0.00296076	0.995432	0.998819	Down
9330133O14Rik	214.488	240.279	188.697	0.785567	-0.348194	0.128796	0.373024	Down
9330136K24Rik	15.318	16.9002	13.7357	0.812418	-0.299707	0.622966	0.837876	Down
9330151L19Rik	726.109	784.219	667.998	0.851655	-0.231659	0.0692288	0.255775	Down
9330158H04Rik	6.13596	7.95441	4.31752	0.543948	-0.87846	0.365935	0.66025	Down
9330159F19Rik	2877.84	2854.59	2901.09	1.0163	0.0233203	0.839966	0.938515	Up
9330159M07Rik	30.9465	32.6256	29.2673	0.897242	-0.15643	0.732011	0.892808	Down
9330162012Rik	92.5119	95.0657	89.9582	0.94635	-0.0795544	0.805738	0.924034	Down
9330175M20Rik	3.15	2.32127	3.97873	1.71846	0.781119	0.546767	0.790555	Up
9330179D12Rik	58.6212	53.8945	63.348	1.17575	0.233583	0.479041	0.749006	Up
9330188P03Rik	27.5492	21.1978	33.9005	1.60088	0.678869	0.217412	0.506039	Up
9330198I05Rik	2.31399	1.31918	3.3088	2.51036	1.32789	0.397903	0.687691	Up
9330198N18Rik	3.3223	2.65822	3.98638	1.50374	0.588553	0.642519	0.847895	Up
9430015G10Rik	381.071	381.711	380.432	0.996654	-0.00483486	0.977278	0.993755	Down
9430021M05Rik	177.484	188.5	166.468	0.88268	-0.180037	0.427322	0.710881	Down
9430037G07Rik	14.3976	19.1306	9.66472	0.505246	-0.984943	0.134419	0.383398	Down
9430038I01Rik	84.4187	84.4273	84.4101	1.00022	0.000315976	0.999111	0.999594	Up
9430041J12Rik	61.6605	52.0118	71.3092	1.37218	0.45647	0.1659	0.434805	Up
9430053O09Rik	192.425	251.714	133.136	0.528679	-0.919537	0.000127052	0.00198955	Down
9430060I03Rik	4.29749	5.94907	2.6459	0.446131	-1.16446	0.3269	0.624524	Down
9430065F17Rik	14.6626	22.9159	6.40934	0.278866	-1.84236	0.0157215	0.0917878	Down
9430078G10Rik	2.99101	2.94513	3.03688	1.02647	0.0376921	0.979456	0.99475	Up
9430078K24Rik	2.34372	2.66815	2.01928	0.756583	-0.402429	0.788581	0.917433	Down
9430083A17Rik	73.7694	90.7963	56.7425	0.624804	-0.678524	0.021529	0.115124	Down
9430083M05Rik	2.48358	2.62882	2.33833	0.888094	-0.171215	0.9097	0.965478	Down
9430085M18Rik	51.051	52.0278	50.0743	0.963414	-0.0537724	0.914884	0.96714	Down
9430091E24Rik	37.8211	35.6132	40.0291	1.12351	0.168013	0.679754	0.867308	Up
9530018F02Rik	32.8238	43.3239	22.3236	0.515608	-0.955654	0.0264867	0.133312	Down
9530026P05Rik	19.6078	21.1974	18.0182	0.850472	-0.233664	0.668336	0.861522	Down
9530027J09Rik	2.82	3.64045	1.99954	0.549695	-0.863298	0.52574	0.778847	Down
9530036O11Rik	8.70473	6.64633	10.7631	1.61942	0.695475	0.407706	0.695873	Up
9530051G07Rik	10.7948	8.22069	13.3689	1.62326	0.698893	0.335923	0.632769	Up
9530052C20Rik	10.9249	12.8422	9.0075	0.700898	-0.512724	0.471781	0.74381	Down
9530052E02Rik	11.085	12.5232	9.64683	0.770472	-0.376186	0.63741	0.845402	Down
9530053A07Rik	3.32418	3.94645	2.70192	0.681483	-0.55325	0.668384	0.861528	Down
9530057J20Rik	2.98208	4.30403	1.66014	0.386684	-1.37077	0.304593	0.602017	Down
9530059O14Rik	1.83472	2.66776	1.00168	0.376018	-1.41113	0.440144	0.720885	Down
9530062K07Rik	22.4696	29.7222	15.217	0.513171	-0.962489	0.0832236	0.287569	Down
9530068E07Rik	4197.94	3953.02	4442.87	1.12392	0.168534	0.0658147	0.247801	Up
9530077C05Rik	265.242	246.069	284.416	1.15591	0.209029	0.304789	0.602226	Up
9530080O11Rik	153.772	128.572	178.971	1.39189	0.477041	0.0302689	0.147088	Up
9530082P21Rik	54.6958	66.3153	43.0762	0.649862	-0.621795	0.0726155	0.26359	Down
9630001P10Rik	26.5666	34.3024	18.8308	0.54801	-0.867726	0.144779	0.399658	Down
9630002D21Rik	2.18221	1.64659	2.71783	1.64255	0.715938	0.656514	0.854869	Up
9630009A06Rik	21.4636	25.4586	17.4686	0.685055	-0.545708	0.320275	0.618396	Down
9630013A20Rik	182.521	194.677	170.365	0.874645	-0.19323	0.351104	0.647579	Down
9630028B13Rik	9.11721	9.92608	8.30833	0.838135	-0.254746	0.751722	0.901959	Down
9630028I04Rik	4.12066	2.9463	5.29502	1.79548	0.844372	0.553922	0.794917	Up
9830166K06Rik	35.3297	32.1237	38.5357	1.19916	0.262024	0.532123	0.782536	Up
9930012K11Rik	26.9396	40.8452	13.034	0.318773	-1.6494	0.000974112	0.0107352	Down
9930014A18Rik	115.513	152.324	78.7025	0.516308	-0.953696	0.00105322	0.0113643	Down
9930021J03Rik	1792.57	1842.58	1742.57	0.945748	-0.0804718	0.563682	0.800514	Down
9930104L06Rik	490.68	488.312	493.048	1.00989	0.0141944	0.92363	0.970284	Up
9930111J21Rik1	9.06294	9.53676	8.58913	0.901545	-0.149529	0.874483	0.954108	Down
A030001D20Rik	202.211	202.712	201.71	0.994858	-0.00743754	0.976459	0.993606	Down
A030010E16Rik	9.63098	13.1799	6.08202	0.459421	-1.12211	0.169235	0.439493	Down
A130010J15Rik	246.527	285.293	207.762	0.728041	-0.457908	0.0167814	0.0964202	Down
A130051J06Rik	2.9896	4.29488	1.68432	0.390803	-1.35548	0.340691	0.63759	Down
A130077B15Rik	5.80609	5.59381	6.01836	1.07414	0.103187	0.915105	0.967262	Up
A230001M10Rik	37.6464	54.0863	21.2066	0.391392	-1.35331	0.00463657	0.0366925	Down
A230004M16Rik	3.82782	3.93613	3.71951	0.940408	-0.088642	0.943561	0.977996	Down
A230006K03Rik	315.527	329.419	301.636	0.915475	-0.127408	0.578181	0.808604	Down
A230009B12Rik	18.5565	24.1796	12.9334	0.53609	-0.899453	0.128081	0.371696	Down
A230028O05Rik	4.82431	4.99935	4.64927	0.933086	-0.0999186	0.925636	0.97111	Down
A230045G11Rik	269.313	275.61	263.016	0.95409	-0.0678025	0.705577	0.881649	Down
A230051N06Rik	79.2151	75.2275	83.2027	1.10638	0.145851	0.619245	0.835412	Up
A230056J06Rik	45.6275	53.6425	37.6125	0.701841	-0.510785	0.192603	0.471536	Down
A230056P14Rik	101.799	104.895	98.7033	0.940504	-0.0884935	0.811466	0.926135	Down
A230057D06Rik	42.2279	41.2707	43.185	1.04554	0.0642492	0.875171	0.954296	Up
A230070E04Rik	532.021	566.109	497.933	0.879495	-0.185253	0.174918	0.447575	Down
A230072C01Rik	342.437	352.825	332.049	0.941176	-0.087464	0.596768	0.821459	Down
A230072E10Rik	10.1026	10.9385	9.26671	0.849401	-0.235483	0.764038	0.907427	Down
A230077H06Rik	150.816	159.469	142.162	0.891229	-0.166132	0.443998	0.723649	Down
A230083G16Rik	19.4015	20.5013	18.3016	0.893514	-0.162437	0.759874	0.905995	Down
A230087F16Rik	4.98235	5.27594	4.68875	0.887361	-0.172407	0.867944	0.950935	Down
A230103J11Rik	76.1255	85.1955	67.0555	0.787021	-0.345526	0.236635	0.527953	Down
A230103O09Rik	3.12794	3.92581	2.33006	0.593049	-0.753777	0.646887	0.849778	Down
A230107N01Rik	21.906	23.1798	20.6323	0.891172	-0.166224	0.742859	0.898009	Down
A2m	251.868	114.555	389.18	3.39762	1.76453	6.39e-12	4.82e-10	Up
A2ml1	294.672	316.283	273.061	0.863422	-0.211863	0.285763	0.583098	Down
A330001L22Rik	3.61131	4.25322	2.96939	0.698777	-0.517097	0.713658	0.885313	Down
A330008L17Rik	25.2249	18.438	32.0119	1.7348	0.794771	0.139165	0.39085	Up
A330009N23Rik	589.729	538.716	640.742	1.18924	0.250038	0.146284	0.401997	Up
A330015K06Rik	18.0476	16.4788	19.6165	1.19051	0.251575	0.704428	0.880834	Up
A330023F24Rik	409.873	448.634	371.113	0.827052	-0.273951	0.156369	0.419605	Down
A330032B11Rik	2.16915	2.00379	2.33451	1.16878	0.225005	0.883177	0.957467	Up
A330032P22Rik	3.32405	4.32506	2.32303	0.538602	-0.89271	0.522597	0.776676	Down
A330033J07Rik	14.309	15.2441	13.374	0.877442	-0.188625	0.769683	0.909679	Down
A330035P11Rik	16.2698	20.5009	12.0387	0.586991	-0.768589	0.245903	0.539246	Down
A330040F15Rik	7.3229	6.26616	8.37964	1.3356	0.417488	0.667655	0.861201	Up
A330041J22Rik	52.9446	60.7739	45.1152	0.742718	-0.429113	0.260091	0.55513	Down
A330048O09Rik	58.3234	68.5208	48.1259	0.702756	-0.508905	0.207581	0.493607	Down
A330049N07Rik	7.92139	10.8503	4.9925	0.460103	-1.11997	0.199883	0.481632	Down
A330069E16Rik	23.8035	28.6661	18.9409	0.66109	-0.597081	0.266043	0.560663	Down
A330069K06Rik	15.3985	20.4604	10.3365	0.505195	-0.985089	0.103255	0.327662	Down
A330070K13Rik	61.0854	34.6092	87.5616	2.52717	1.33752	5.63e-05	0.000995377	Up
A330074K22Rik	45.5437	54.7924	36.295	0.662607	-0.593774	0.152706	0.412893	Down
A330076C08Rik	9.78108	9.62048	9.94169	1.03598	0.0509895	0.94803	0.97956	Up
A330076H08Rik	29.0829	31.0326	27.1333	0.873283	-0.195479	0.658708	0.856488	Down
A330093E20Rik	17.598	18.5456	16.6503	0.898711	-0.154071	0.788551	0.917433	Down
A330094K24Rik	2.99027	2.66854	3.31201	1.24636	0.317722	0.817945	0.928298	Up
A330102I10Rik	80.9371	81.9872	79.8869	0.974088	-0.0378765	0.888941	0.95932	Down
A3galt2	2.62926	1.64659	3.61193	2.1971	1.1356	0.478422	0.748528	Up
A430005L14Rik	574.817	578.079	571.554	0.988809	-0.0162367	0.910251	0.965505	Down
A430010J10Rik	2.99775	2.97453	3.02096	1.01407	0.0201533	0.987844	0.997257	Up
A430018G15Rik	91.8803	103.072	80.6891	0.782316	-0.354177	0.237638	0.528804	Down
A430027H14Rik	20.1406	25.8908	14.3904	0.555806	-0.847347	0.15056	0.409875	Down
A430033K04Rik	366.508	370.705	362.312	0.977245	-0.0332076	0.84044	0.938797	Down
A430035B10Rik	90.7562	100.106	81.4063	0.812491	-0.299577	0.285524	0.582832	Down
A430046D13Rik	437.197	450.436	423.957	0.941167	-0.0874776	0.542485	0.787821	Down
A430057M04Rik	14.0762	17.4772	10.6753	0.610616	-0.711663	0.276223	0.572316	Down
A430078I02Rik	2.48305	3.96825	0.997858	0.251844	-1.9894	0.227122	0.516972	Down
A430093F15Rik	2.84702	4.34531	1.34874	0.309753	-1.69081	0.277937	0.573835	Down
A430105J06Rik	9.93612	11.5353	8.33695	0.722445	-0.46904	0.53319	0.783148	Down
A430108G06Rik	36.3073	44.94	27.6747	0.615958	-0.699097	0.0934253	0.309237	Down
A4galt	38.0893	41.5169	34.6616	0.834683	-0.2607	0.560632	0.799131	Down
A4gnt	3.51276	1.31918	5.70635	4.31693	2.11001	0.117461	0.35336	Up
A530013C23Rik	7.98661	3.28247	12.6907	3.85399	1.94635	0.029325	0.143758	Up
A530058N18Rik	151.203	152.713	149.692	0.980461	-0.0284674	0.891777	0.960012	Down
A530072M11Rik	12.1056	14.2015	10.0098	0.704774	-0.504766	0.476618	0.746898	Down
A630001G21Rik	8.10549	8.58022	7.63075	0.890341	-0.16757	0.844395	0.940704	Down
A630019I02Rik	3.80867	1.98354	5.63381	2.84366	1.50775	0.265371	0.560337	Up
A630023P12Rik	19.6665	9.24186	30.0912	3.25317	1.70185	0.00271051	0.024246	Up
A630026N12Rik	111.488	153.385	69.5911	0.453393	-1.14117	6.61e-06	0.000155795	Down
A630034I12Rik	30.8171	37.9746	23.6597	0.623203	-0.682226	0.134056	0.382909	Down
A630039O03Rik	6.97561	7.2591	6.69212	0.920867	-0.118935	0.891472	0.95991	Down
A630066F11Rik	33.8761	39.4585	28.2936	0.717916	-0.478114	0.288974	0.585986	Down
A630072M18Rik	303.699	277.831	329.568	1.18642	0.246621	0.180658	0.456009	Up
A630075F10Rik	2.9555	4.92906	0.981943	0.20077	-2.31638	0.155029	0.417474	Down
A630077J23Rik	1.82041	2.63914	1.00168	0.379366	-1.39834	0.449722	0.727709	Down
A630089N07Rik	33.3525	26.3499	40.3552	1.53027	0.61379	0.152453	0.412376	Up
A730017L22Rik	209.858	213.165	206.55	0.968679	-0.0459088	0.802944	0.923006	Down
A730018C14Rik	2.00656	0.99216	3.02096	3.04229	1.60516	0.346488	0.642939	Up
A730020E08Rik	89.9905	97.5264	82.4546	0.845463	-0.242186	0.383179	0.675307	Down
A730020M07Rik	14.3211	11.1952	17.447	1.55525	0.63715	0.334624	0.63212	Up
A730035I17Rik	45.8227	52.6396	39.0058	0.741444	-0.431591	0.247623	0.541528	Down
A730036I17Rik	25.629	25.072	26.1859	1.04539	0.0640413	0.905421	0.965112	Up
A730043L09Rik	5.63202	1.97439	9.28966	4.70027	2.23274	0.0649277	0.245863	Up
A730046J19Rik	14.1794	6.90268	21.4562	3.10105	1.63276	0.0295787	0.144859	Up
A730049H05Rik	2.64463	1.31879	3.97046	3.01257	1.59099	0.286131	0.58355	Up
A730056A06Rik	87.9143	96.2218	79.6068	0.82771	-0.272803	0.361066	0.656487	Down
A730060N03Rik	298.198	294.919	301.477	1.02208	0.0315138	0.8647	0.949867	Up
A730063M14Rik	24.1265	22.5448	25.7082	1.14113	0.190466	0.693709	0.874463	Up
A730081D07Rik	93.0828	102.297	83.8682	0.81989	-0.286498	0.309324	0.607281	Down
A730090N16Rik	1.82778	0.327021	3.32854	9.37245	3.22843	0.104494	0.330009	Up
A730094K22Rik	6.47166	7.2408	5.70252	0.785805	-0.347758	0.715795	0.885913	Down
A730098A19Rik	20.4505	23.8934	17.0076	0.712535	-0.488967	0.377204	0.671065	Down
A730099G02Rik	2.13741	1.30925	2.96557	2.26303	1.17825	0.500886	0.763243	Up
A830005F24Rik	22.7191	17.5546	27.8835	1.59101	0.669944	0.197857	0.479003	Up
A830009L08Rik	11.4374	13.5253	9.3495	0.690927	-0.533394	0.469853	0.742181	Down
A830011K09Rik	67.8749	85.8084	49.9414	0.581633	-0.78182	0.0195597	0.107988	Down
A830018L16Rik	3394.34	3670.55	3118.14	0.849428	-0.235437	0.0669472	0.250366	Down
A830019L24Rik	6.46607	8.26313	4.66901	0.565184	-0.823207	0.380179	0.672955	Down
A830019P07Rik	38.8443	52.625	25.0637	0.476194	-1.07038	0.0115284	0.0727717	Down
A830021F12Rik	13.9187	14.5404	13.297	0.915416	-0.1275	0.839145	0.938368	Down
A830021M18Rik	80.0566	80.2299	79.8832	0.996764	-0.00467581	0.987718	0.997257	Down
A830035O19Rik	25.6093	23.0155	28.2031	1.22279	0.290179	0.588693	0.816215	Up
A830036E02Rik	82.6441	102.026	63.2621	0.620525	-0.688439	0.0374897	0.16989	Down
A830052D11Rik	28.8562	34.354	23.3584	0.67988	-0.556648	0.199155	0.480891	Down
A830082K12Rik	271.676	299.924	243.429	0.811423	-0.301474	0.0914679	0.305152	Down
A830082N09Rik	774.18	843.539	704.822	0.835448	-0.259379	0.0353602	0.163213	Down
A830092H15Rik	68.0749	56.1535	79.9963	1.42357	0.509516	0.0947658	0.311702	Up
A930001A20Rik	3.84069	3.97779	3.7036	0.92956	-0.10538	0.928903	0.972437	Down
A930001C03Rik	4.81252	4.94776	4.67728	0.944569	-0.0822712	0.936992	0.9756	Down
A930003A15Rik	13.336	16.2763	10.3957	0.63848	-0.647287	0.335576	0.632571	Down
A930003O13Rik	5.17225	4.02744	6.31706	1.57483	0.655193	0.589985	0.816697	Up
A930004D18Rik	129.768	148.692	110.844	0.745372	-0.423967	0.0745144	0.268281	Down
A930005G22Rik	8.66352	11.9238	5.40322	0.451798	-1.14625	0.213998	0.501435	Down
A930005H10Rik	229.68	251.656	207.703	0.82524	-0.277115	0.244273	0.536883	Down
A930006K02Rik	10.9269	14.8261	7.0277	0.473256	-1.07931	0.132248	0.379708	Down
A930007A09Rik	33.0552	39.447	26.6635	0.67641	-0.56403	0.264469	0.559078	Down
A930007I19Rik	6.80335	7.6087	5.99801	0.788808	-0.342253	0.708489	0.883068	Down
A930009A15Rik	16.1286	18.5877	13.6695	0.736187	-0.441856	0.485711	0.753397	Down
A930011G23Rik	9.6179	9.26289	9.97291	1.07803	0.108402	0.883178	0.957467	Up
A930012L18Rik	45.3652	46.2878	44.4427	0.959932	-0.0589963	0.871019	0.952103	Down
A930013F10Rik	26.9576	29.6507	24.2646	0.818609	-0.288754	0.551622	0.793792	Down
A930015D03Rik	40.2812	35.9108	44.6516	1.24293	0.31374	0.470935	0.743052	Up
A930016O22Rik	3.78705	4.61236	2.96174	0.643902	-0.635088	0.647989	0.85016	Down
A930017K11Rik	22.1183	31.486	12.7506	0.404471	-1.30589	0.0227553	0.120005	Down
A930018O16Rik	1.99498	3.3035	0.686459	0.205178	-2.28505	0.236641	0.527953	Down
A930024E05Rik	215.776	130.564	300.987	2.3054	1.20502	2.41e-11	1.69e-09	Up
A930028N01Rik	1.99051	2.32088	1.66014	0.717133	-0.479687	0.757078	0.904558	Down
A930033H14Rik	96.7565	120.61	72.9031	0.603965	-0.727464	0.0150156	0.0889982	Down
A930035F09Rik	9.79712	7.87459	11.7197	1.48518	0.570633	0.519638	0.774709	Up
A930037H05Rik	26.8096	31.0287	22.5905	0.72869	-0.456623	0.362861	0.657504	Down
A930038B10Rik	3.83306	2.98563	4.68049	1.56881	0.649667	0.60036	0.823216	Up
AA386476	9.93532	15.5207	4.34996	0.279896	-1.83704	0.0169423	0.096981	Down
AA387200	12.3025	9.5792	15.0259	1.56814	0.649052	0.336201	0.632998	Up
AA387883	61.839	68.834	54.8441	0.796613	-0.328049	0.372413	0.66614	Down
AA388235	172.944	204.42	141.469	0.691681	-0.531822	0.0145743	0.0870798	Down
AA414768	318.185	330.701	305.668	0.924423	-0.113374	0.462359	0.736389	Down
AA465934	39.39	58.8699	19.9102	0.338835	-1.56135	0.000567849	0.00694852	Down
AA467197	7.74984	7.55555	7.94413	1.05179	0.0728433	0.944313	0.978379	Up
AA543186	6.94406	6.59357	7.29456	1.10727	0.14701	0.875054	0.954296	Up
AA986860	84.9788	80.769	89.1886	1.10349	0.142077	0.62455	0.83842	Up
AB010352	294.896	333.344	256.447	0.769204	-0.378562	0.0297655	0.145415	Down
AB124611	8.83389	7.58729	10.0805	1.32585	0.406916	0.608682	0.828802	Up
AI115009	156.662	133.525	179.798	1.34661	0.429334	0.144265	0.398881	Up
AI182371	2.65889	2.34074	2.97704	1.27783	0.353699	0.817542	0.928264	Up
AI197445	19.5558	19.16	19.9516	1.04197	0.0593146	0.921593	0.969475	Up
AI225912	4.14467	3.64006	4.64927	1.27936	0.355418	0.746773	0.899665	Up
AI413582	1181.19	1245.82	1116.56	0.896293	-0.157958	0.28204	0.578288	Down
AI429214	81.3261	91.8148	70.8373	0.771173	-0.374873	0.170284	0.441124	Down
AI450353	24.4406	29.1404	19.7408	0.67726	-0.562219	0.286895	0.584065	Down
AI463170	3.30577	5.61367	0.997858	0.178043	-2.4897	0.0838785	0.28888	Down
AI467606	40.5055	46.5494	34.4616	0.741282	-0.431906	0.324949	0.62247	Down
AI504432	1303.59	1339.64	1267.55	0.946024	-0.0800508	0.568941	0.803455	Down
AI593442	8042.41	7154.85	8929.98	1.2481	0.319733	0.0469592	0.199026	Up
AI597479	1591.79	1666.6	1516.98	0.910174	-0.135786	0.189659	0.468393	Down
AI661453	8.43927	9.24459	7.63396	0.826778	-0.274428	0.740635	0.897055	Down
AI662270	8.98769	9.94983	8.02555	0.806805	-0.309708	0.701252	0.878881	Down
AI837181	2085.58	2309.46	1861.71	0.806126	-0.310924	0.0145676	0.0870798	Down
AI839979	9.83043	7.30952	12.3513	1.69242	0.759088	0.317053	0.615399	Up
AI847159	11.2923	6.3086	16.276	2.58514	1.37024	0.0988354	0.319286	Up
AI987944	286.348	266.943	305.752	1.14515	0.195534	0.27175	0.567299	Up
ATP6	2866.52	3013.2	2719.84	0.902601	-0.14784	0.287487	0.584648	Down
ATP8	169.704	167.606	171.802	1.02578	0.036715	0.893153	0.960699	Up
AU020206	61.713	33.1051	90.321	2.73122	1.44954	0.00104388	0.01131	Up
AU021063	5.1553	4.93861	5.372	1.08508	0.117807	0.909834	0.965478	Up
AU021092	77.469	86.8651	68.073	0.782819	-0.353249	0.260367	0.555268	Down
AU022252	1038.35	1001.62	1075.08	1.07327	0.102014	0.36122	0.656487	Up
AU022754	40.929	31.7012	50.1568	1.58147	0.661263	0.143428	0.397691	Up
AU023762	46.899	26.1134	67.6846	2.59054	1.37325	0.000564106	0.00692622	Up
AU040320	2201.98	2237.76	2166.19	0.967983	-0.0469461	0.719887	0.887068	Down
AU040972	4.34001	3.96708	4.71293	1.18554	0.245539	0.823658	0.931289	Up
AU041133	197.958	186.377	209.539	1.12403	0.168686	0.446209	0.725267	Up
AU041480	4.82048	5.94946	3.69151	0.619406	-0.691042	0.515322	0.772003	Down
AV039307	11.6148	14.2023	9.02724	0.635153	-0.654823	0.329795	0.627165	Down
AV051173	2.99302	2.33081	3.65524	1.57343	0.653914	0.625832	0.839292	Up
AV099323	8.6543	10.2765	7.03214	0.684071	-0.547782	0.501221	0.763434	Down
AW011738	60.8665	82.9297	38.8032	0.467533	-1.09686	0.000630437	0.00758162	Down
AW046200	17.8726	13.2712	22.4739	1.69731	0.763249	0.252666	0.546788	Up
AW047730	427.113	546.079	308.146	0.564278	-0.825522	0.000300681	0.00407938	Down
AW112010	50.6125	51.1911	50.0339	0.977368	-0.0330269	0.926865	0.971567	Down
AW121686	12.6025	16.2057	8.99923	0.555648	-0.847756	0.190495	0.469153	Down
AW146154	135.325	144.04	126.609	0.879096	-0.185908	0.456701	0.7329	Down
AW209491	1006.03	979.957	1032.1	1.0533	0.0749164	0.514538	0.771496	Up
AW495222	34.9899	43.0458	26.934	0.626586	-0.674415	0.106012	0.332485	Down
AW549542	4.98147	5.92882	4.03412	0.678927	-0.558671	0.6441	0.848477	Down
AW549877	2283.45	2653.7	1913.19	0.720935	-0.472059	6.3e-05	0.00109648	Down
AW551984	320.405	299.907	340.903	1.13672	0.184881	0.725398	0.889741	Up
AW554918	367.133	388.139	346.126	0.891788	-0.165228	0.271404	0.566755	Down
AW822252	21.786	22.473	21.099	0.937988	-0.0923582	0.853414	0.944555	Down
AY036118	51.8179	68.3382	35.2976	0.515943	-0.954715	0.0215687	0.115243	Down
AY074887	2.15643	2.99595	1.31691	0.442256	-1.17705	0.478177	0.748264	Down
Aaas	455.344	431.848	478.84	1.10899	0.149246	0.399149	0.68841	Up
Aacs	1882.43	1871.61	1893.25	1.01157	0.0166006	0.884457	0.957796	Up
Aadat	6.5176	6.27881	6.75639	1.07306	0.101728	0.91538	0.967313	Up
Aagab	2588.08	2696.86	2479.3	0.919349	-0.121315	0.241128	0.533183	Down
Aak1	15152	16560.5	13743.6	0.829898	-0.268995	0.0187257	0.104746	Down
Aamdc	1000.09	1031.95	968.225	0.938114	-0.0921655	0.486581	0.753769	Down
Aamp	6570.64	6671.81	6469.47	0.96968	-0.0444195	0.667045	0.860917	Down
Aar2	1583.94	1588.46	1579.43	0.994328	-0.00820698	0.93825	0.976264	Down
Aard	108.011	112.148	103.874	0.926249	-0.110528	0.697917	0.876657	Down
Aars	7574.57	6157.94	8991.21	1.46012	0.54609	0.000160592	0.00241592	Up
Aars2	915.797	828.856	1002.74	1.20986	0.274838	0.0145782	0.0870798	Up
Aarsd1	1848.77	1846.97	1850.56	1.00194	0.00279349	0.981115	0.995469	Up
Aasdh	273.436	272.135	274.736	1.00939	0.0134795	0.937468	0.97591	Up
Aasdhppt	1381.14	1290.19	1472.08	1.14105	0.190363	0.121121	0.360231	Up
Aass	141.166	151.197	131.136	0.867066	-0.205786	0.37412	0.668111	Down
Aatf	528.38	469.535	587.225	1.25085	0.322907	0.0266444	0.133814	Up
Aatk	8580.44	9175.83	7985.05	0.870217	-0.200554	0.11624	0.351014	Down
Abat	9866.15	10907.3	8824.97	0.809074	-0.305656	0.00677592	0.0490106	Down
Abca1	1126.36	1157.21	1095.51	0.946654	-0.0790913	0.5825	0.811482	Down
Abca12	4.62129	5.27594	3.96664	0.753496	-0.408328	0.709699	0.883479	Down
Abca13	3.479	4.95846	1.99954	0.403503	-1.30935	0.292858	0.589267	Down
Abca17	13.3303	11.8703	14.7902	1.24327	0.314144	0.637066	0.845302	Up
Abca2	6692.57	7099.46	6285.67	0.885361	-0.175663	0.196808	0.477839	Down
Abca3	3008.45	2846.3	3170.6	1.11388	0.155589	0.253897	0.548318	Up
Abca4	89.5844	52.0737	127.095	2.44326	1.28881	0.000178674	0.00264792	Up
Abca5	1713.56	1746.36	1680.75	0.962333	-0.0553921	0.6513	0.851921	Down
Abca6	53.9657	70.4508	37.4806	0.531678	-0.911376	0.00953393	0.0631881	Down
Abca7	362.966	361.949	363.984	1.0054	0.00776529	0.959475	0.98486	Up
Abca8a	202.863	297.81	107.916	0.362107	-1.46551	1.72e-06	4.88e-05	Down
Abca8b	750.806	812.94	688.672	0.847003	-0.23956	0.105648	0.331992	Down
Abca9	333.538	334.057	333.018	0.996883	-0.00450417	0.980347	0.995097	Down
Abcb10	1178.21	1066.86	1289.57	1.20878	0.273547	0.131364	0.378042	Up
Abcb1a	757.704	806.549	708.858	0.878693	-0.186569	0.289331	0.586355	Down
Abcb1b	115.235	127.245	103.226	0.811532	-0.301279	0.290971	0.587521	Down
Abcb4	174.615	166.606	182.624	1.09545	0.131517	0.555877	0.796213	Up
Abcb6	637.99	566.05	709.929	1.25439	0.326981	0.0103482	0.0672936	Up
Abcb7	1741.35	1903.41	1579.29	0.829676	-0.26938	0.00756211	0.0530521	Down
Abcb8	1475.55	1564.57	1386.53	0.886152	-0.174373	0.0927612	0.307858	Down
Abcb9	1059.7	1188.52	930.891	0.783226	-0.352499	0.0139868	0.0842961	Down
Abcc1	538.434	491.912	584.956	1.18905	0.249811	0.163156	0.430962	Up
Abcc10	152.265	165.165	139.365	0.843888	-0.244877	0.257522	0.551896	Down
Abcc12	16.9856	12.21	21.7613	1.78032	0.832139	0.160294	0.426173	Up
Abcc3	52.3027	64.5451	40.0603	0.620755	-0.687904	0.07569	0.270707	Down
Abcc4	317.385	267.081	367.688	1.37691	0.46143	0.017266	0.0984377	Up
Abcc5	2796.66	2917.6	2675.72	0.917076	-0.124886	0.309218	0.607281	Down
Abcc6	16.8965	17.1203	16.6727	0.973288	-0.0390607	0.951484	0.980704	Down
Abcc8	552.858	794.088	311.629	0.392282	-1.35004	2.8e-21	5.47e-19	Down
Abcc9	191.74	172.912	210.569	1.21808	0.284612	0.323166	0.620944	Up
Abcd1	390.209	369.766	410.651	1.11058	0.151317	0.33628	0.633086	Up
Abcd2	1207.59	1296.76	1118.42	0.86241	-0.213555	0.132174	0.379564	Down
Abcd3	3453.94	3283.88	3624	1.10358	0.142186	0.123053	0.363642	Up
Abcd4	299.657	323.111	276.203	0.855	-0.226003	0.157579	0.421376	Down
Abce1	4838.23	4400.91	5275.55	1.19874	0.261523	0.00517631	0.040056	Up
Abcf1	3147.15	3033.02	3261.28	1.07523	0.104642	0.264285	0.558969	Up
Abcf2	3681.42	3725.01	3637.83	0.976599	-0.0341623	0.730276	0.891831	Down
Abcf3	2481.22	2341.12	2621.32	1.11969	0.163096	0.0844964	0.290351	Up
Abcg1	2220.71	2591.84	1849.58	0.71358	-0.486854	2.68e-05	0.000528179	Down
Abcg2	563.911	569.783	558.038	0.979149	-0.0304001	0.872889	0.953309	Down
Abcg3	6.1576	7.98498	4.33022	0.543367	-0.880002	0.360763	0.656332	Down
Abcg4	1956.1	2142.32	1769.89	0.826097	-0.275617	0.017449	0.0992713	Down
Abhd10	593.623	621.095	566.152	0.91167	-0.133417	0.300035	0.596801	Down
Abhd11	799.831	828.58	771.082	0.930645	-0.103698	0.461499	0.735773	Down
Abhd11os	15.2667	16.8696	13.6638	0.810456	-0.303194	0.610944	0.830348	Down
Abhd12	12975.7	11649.6	14301.9	1.22768	0.295936	0.00812699	0.0560664	Up
Abhd12b	38.1263	27.0785	49.1741	1.81668	0.861301	0.0748301	0.268883	Up
Abhd13	1960.51	1875.76	2045.25	1.09036	0.124799	0.220858	0.509612	Up
Abhd14a	808.679	842.47	774.887	0.91992	-0.12042	0.385602	0.677254	Down
Abhd14b	234	283.113	184.887	0.653124	-0.614571	0.00087179	0.00985866	Down
Abhd15	43.3055	23.4437	63.1672	2.6952	1.43039	0.000298093	0.00404979	Up
Abhd16a	2435.27	2439.61	2430.93	0.996462	-0.00511348	0.96161	0.985679	Down
Abhd17a	5122.33	5249.41	4995.25	0.951586	-0.0715939	0.580507	0.809999	Down
Abhd17b	1815.71	1759.81	1871.62	1.06351	0.0888334	0.413815	0.700295	Up
Abhd17c	2021.97	2132.66	1911.28	0.896263	-0.158006	0.137942	0.389044	Down
Abhd18	350.644	340.473	360.814	1.05961	0.08353	0.61524	0.832492	Up
Abhd2	4559.3	3300	5818.61	1.76318	0.81818	8.74e-13	7.53e-11	Up
Abhd3	2495.67	2739.36	2251.99	0.822112	-0.282593	0.0214585	0.114901	Down
Abhd4	3087.61	3116.92	3058.3	0.981253	-0.0273023	0.862906	0.949166	Down
Abhd5	729.099	695.538	762.659	1.09649	0.132889	0.330282	0.627852	Up
Abhd6	2522.44	2364.28	2680.61	1.13383	0.181198	0.105744	0.332	Up
Abhd8	8408.07	9718.1	7098.04	0.730381	-0.453278	0.000878034	0.00989553	Down
Abi1	8542.2	7985.57	9098.84	1.13941	0.188284	0.0498409	0.207008	Up
Abi2	8664.57	8780.12	8549.02	0.973673	-0.038491	0.676905	0.865671	Down
Abi3	196.385	168.691	224.08	1.32907	0.410414	0.0845101	0.290351	Up
Abi3bp	42.639	39.4431	45.8349	1.16221	0.216865	0.616077	0.832616	Up
Abitram	773.926	804.885	742.967	0.923054	-0.115513	0.402503	0.691242	Down
Abl1	1615.36	1666.86	1563.86	0.938219	-0.0920039	0.404937	0.693466	Down
Abl2	3203.88	3054.82	3352.94	1.09754	0.134276	0.34286	0.639905	Up
Ablim1	3306.13	3273.32	3338.93	1.02	0.0285721	0.844481	0.940704	Up
Ablim2	2680.42	2828.08	2532.76	0.895506	-0.159224	0.221631	0.510607	Down
Ablim3	921.764	976.039	867.488	0.888614	-0.170372	0.166277	0.435089	Down
Abr	26006.8	24209.9	27803.7	1.14844	0.199677	0.058484	0.229859	Up
Abracl	649.133	618.178	680.088	1.10033	0.137936	0.31661	0.6149	Up
Abraxas1	114.848	122.496	107.199	0.875681	-0.191522	0.497756	0.761332	Down
Abraxas2	993.175	959.374	1026.98	1.07055	0.0983585	0.399078	0.688403	Up
Abt1	685.62	608.255	762.984	1.25451	0.327121	0.00867659	0.058946	Up
Abtb1	688.591	816.97	560.212	0.685804	-0.544133	1.62e-05	0.000340807	Down
Abtb2	489.952	470.592	509.313	1.08264	0.114549	0.491846	0.757269	Up
Acaa1a	1868.39	1674.91	2061.87	1.2311	0.299953	0.0317352	0.151615	Up
Acaa1b	13.325	10.5721	16.0779	1.51945	0.603551	0.359743	0.655176	Up
Acaa2	875.755	972.025	779.485	0.801966	-0.318387	0.0600348	0.233787	Down
Acaca	2251.3	2158.26	2344.34	1.08617	0.119245	0.34608	0.6426	Up
Acacb	141.805	147.739	135.87	0.919256	-0.121461	0.600205	0.823188	Down
Acad10	57.5213	45.5382	69.5045	1.52777	0.611425	0.109082	0.338556	Up
Acad11	977.488	916.813	1038.16	1.13237	0.179345	0.125629	0.368083	Up
Acad12	70.5714	74.4638	66.6791	0.895943	-0.158522	0.588895	0.816323	Down
Acad8	1031.08	1122.45	939.705	0.837326	-0.256138	0.0346032	0.160988	Down
Acad9	1663.69	1616.26	1711.13	1.05871	0.0823108	0.43457	0.716471	Up
Acadl	1455.5	1518.43	1392.57	0.917205	-0.124685	0.354205	0.650226	Down
Acadm	1440.4	1507.63	1373.16	0.910933	-0.134584	0.302621	0.599626	Down
Acads	266.495	287.159	245.831	0.856459	-0.223544	0.306314	0.603984	Down
Acadsb	2460.2	2644.72	2275.69	0.860497	-0.216757	0.0308136	0.149	Down
Acadvl	1805.67	1651.67	1959.68	1.18659	0.246826	0.0417368	0.183051	Up
Acan	183.564	123.873	243.255	1.96359	0.973494	0.000215622	0.00310081	Up
Acap2	3894.79	3924.99	3864.6	0.984569	-0.0224359	0.860141	0.947701	Down
Acap3	4835.18	4609.3	5061.07	1.09804	0.134931	0.150709	0.410225	Up
Acat1	4165.43	4006.26	4324.6	1.07944	0.110283	0.271114	0.56633	Up
Acat2	1243.43	1183.46	1303.4	1.10139	0.139322	0.200051	0.481803	Up
Acat3	218.812	226.689	210.936	0.930465	-0.103977	0.69121	0.873751	Down
Acbd3	1604.51	1543.05	1665.97	1.07975	0.110692	0.298172	0.595276	Up
Acbd5	3405.35	3637.71	3172.98	0.872235	-0.197211	0.0575067	0.227276	Down
Acbd6	1871.83	1751.82	1991.85	1.1371	0.185357	0.092982	0.308334	Up
Acbd7	12.6043	15.5357	9.67298	0.62273	-0.68332	0.383162	0.675307	Down
Accs	69.0978	83.3623	54.8333	0.65756	-0.604807	0.0410609	0.181125	Down
Acd	991.154	987.302	995.006	1.00774	0.0111252	0.930845	0.973035	Up
Ace	610.784	451.356	770.212	1.70653	0.771067	0.0649079	0.245835	Up
Ace2	40.3413	38.2056	42.477	1.11056	0.151284	0.718591	0.886564	Up
Acer2	382.918	248.131	517.704	2.08638	1.061	0.0451347	0.193686	Up
Acer3	400.526	366.987	434.065	1.18303	0.242488	0.135948	0.38578	Up
Ache	2564.09	2074.8	3053.38	1.47167	0.557458	2.04e-06	5.65e-05	Up
Acin1	2944.07	2816.77	3071.36	1.0904	0.12486	0.318092	0.616515	Up
Ackr2	25.3636	31.666	19.0612	0.601407	-0.733587	0.149658	0.408368	Down
Ackr3	810.84	579.596	1042.08	1.79812	0.84649	4.32e-09	2.13e-07	Up
Ackr4	3.86432	2.6884	5.04025	1.88093	0.911445	0.502625	0.764462	Up
Acly	6911.87	6335.22	7488.52	1.18205	0.241292	0.0134343	0.0818183	Up
Acnat1	3.6709	3.32297	4.01882	1.21023	0.275284	0.815289	0.927399	Up
Aco1	1166.6	1127.5	1205.69	1.0694	0.0967984	0.390066	0.681066	Up
Aco2	21708	21895.2	21520.8	0.982905	-0.0248758	0.800145	0.92139	Down
Acot1	610.874	473.947	747.802	1.57803	0.658123	0.00108559	0.0116164	Up
Acot11	1669.22	1628.59	1709.85	1.04984	0.0701696	0.504911	0.765759	Up
Acot12	7.94986	5.93953	9.9602	1.6779	0.746655	0.389814	0.681046	Up
Acot13	2437.6	2517.96	2357.24	0.936111	-0.0952484	0.43014	0.713274	Down
Acot2	380.999	421.425	340.573	0.808177	-0.307257	0.053957	0.218318	Down
Acot3	140.537	161.717	119.357	0.73789	-0.438523	0.0846644	0.290781	Down
Acot4	54.8451	39.2835	70.4067	1.79034	0.840235	0.0185053	0.103729	Up
Acot5	124.305	175.871	72.74	0.413111	-1.2754	4.14e-07	1.4e-05	Down
Acot6	297.873	348.469	247.277	0.70947	-0.495187	0.00279375	0.0248232	Down
Acot7	12104.7	11793.6	12415.8	1.05276	0.0741762	0.481417	0.750768	Up
Acot8	433.827	354.823	512.832	1.44535	0.531422	0.00305066	0.0266421	Up
Acot9	763.854	737.014	790.693	1.07298	0.10162	0.432443	0.715216	Up
Acox1	8537.29	7930.23	9144.35	1.15311	0.205533	0.0219154	0.116564	Up
Acox2	4.84776	5.68435	4.01117	0.706877	-0.500469	0.670142	0.862621	Down
Acox3	930.016	1004.41	855.623	0.851878	-0.231282	0.049044	0.204853	Down
Acp1	2626.57	2391.42	2861.72	1.19665	0.259005	0.0106873	0.0688382	Up
Acp2	2937.13	3121.51	2752.76	0.881859	-0.18138	0.0941269	0.310562	Down
Acp5	17.2222	13.8764	20.568	1.48382	0.569316	0.34763	0.644096	Up
Acp6	295.407	285.158	305.657	1.07206	0.100391	0.544366	0.789228	Up
Acp7	82.1821	49.5095	114.855	2.31865	1.21328	1.32e-05	0.000285533	Up
Acpp	19.4839	9.26367	29.7042	3.20762	1.6815	0.00735451	0.0519098	Up
Acr	11.9973	13.22	10.7746	0.813262	-0.298208	0.678591	0.866658	Down
Acrbp	38.7003	38.2294	39.1712	1.02341	0.0333838	0.937589	0.975934	Up
Acsbg1	6698.27	6778.01	6618.53	0.976478	-0.0343405	0.804471	0.923752	Down
Acsbg3	7.83264	8.97636	6.68891	0.745693	-0.423346	0.620225	0.836074	Down
Acsf2	589.021	643.63	534.412	0.830409	-0.268106	0.160693	0.426835	Down
Acsf3	524.787	536.957	512.617	0.954827	-0.0666887	0.614314	0.832427	Down
Acsl1	1725.38	1811.74	1639.02	0.904563	-0.144707	0.265479	0.560441	Down
Acsl3	6499.07	6777.7	6220.45	0.917771	-0.123794	0.281757	0.578126	Down
Acsl4	4364.03	3933.36	4794.7	1.21895	0.285644	0.0135036	0.0821401	Up
Acsl5	3074.17	2672.96	3475.38	1.30023	0.378771	0.000250464	0.00351055	Up
Acsl6	8465.58	7749.02	9182.14	1.18495	0.244825	0.0539874	0.218396	Up
Acsm3	4.47411	6.2463	2.70192	0.43041	-1.21622	0.301146	0.598067	Down
Acss1	1166.56	1344.82	988.306	0.734852	-0.444474	0.000553856	0.006827	Down
Acss2	2191.64	2128.27	2255.02	1.05954	0.0834388	0.579356	0.809187	Up
Acss2os	3.97266	3.63928	4.30604	1.18578	0.245837	0.831295	0.934926	Up
Acss3	40.7321	33.496	47.9681	1.43379	0.519838	0.193914	0.47316	Up
Acta1	321.213	318.763	323.663	1.01521	0.021772	0.90874	0.965386	Up
Acta2	484.053	557.768	410.339	0.735804	-0.442607	0.0666665	0.249738	Down
Actb	38930.9	35913.6	41948.3	1.16804	0.224084	0.0393903	0.176034	Up
Actc1	380.549	316.335	444.763	1.40592	0.491514	0.0792636	0.278381	Up
Actg1	32486.8	30366.7	34606.8	1.13963	0.18856	0.034976	0.161939	Up
Actg2	1.33938	2.35145	0.327314	0.152881	-2.70952	0.270261	0.56549	Down
Actl6a	400.263	363.463	437.063	1.20268	0.266258	0.167511	0.436671	Up
Actl6b	2820.29	2911.97	2728.61	0.936978	-0.0939131	0.398292	0.687809	Down
Actl9	2.49411	2.98485	2.00337	0.671641	-0.574238	0.687873	0.871744	Down
Actn1	2726.63	2298.59	3154.66	1.37242	0.456721	0.00500506	0.0390326	Up
Actn2	490.119	501.865	478.373	0.952852	-0.0696753	0.67607	0.865261	Down
Actn3	36.7231	39.1986	34.2477	0.873837	-0.194563	0.658949	0.856511	Down
Actn4	4128.4	3738.94	4517.86	1.20834	0.273029	0.00503764	0.039181	Up
Actr10	5732.12	5678.62	5785.62	1.01883	0.0269203	0.766933	0.908405	Up
Actr1a	7490.42	7599.41	7381.43	0.971315	-0.0419889	0.661916	0.857857	Down
Actr1b	11581.6	11465.6	11697.5	1.02022	0.0288862	0.757862	0.905201	Up
Actr2	18481.7	18153.6	18809.8	1.03615	0.0512275	0.553111	0.794527	Up
Actr3	14846.3	13629.2	16063.4	1.17861	0.237085	0.0232475	0.121442	Up
Actr3b	5531.97	6105.34	4958.61	0.812161	-0.300162	0.00479675	0.0376826	Down
Actr5	153.439	171.872	135.006	0.785702	-0.347946	0.115753	0.350019	Down
Actr6	1029.11	983.57	1074.66	1.09251	0.127646	0.280146	0.576511	Up
Actr8	1816.07	1807	1825.15	1.01007	0.0144505	0.883787	0.957592	Up
Actrt3	14.2632	21.2077	7.31874	0.34566	-1.53257	0.0236858	0.122861	Down
Acvr1	2343.26	1506.61	3179.9	2.11053	1.07761	4.94e-17	6.82e-15	Up
Acvr1b	3950.6	4428.98	3472.23	0.783992	-0.351089	0.00535743	0.0410744	Down
Acvr1c	1664.22	565.161	2763.28	4.88832	2.28934	2.84e-63	2.83e-60	Up
Acvr2a	1963.95	2318.97	1608.92	0.693824	-0.527358	9.93e-05	0.00161415	Down
Acvr2b	334.867	435.956	233.777	0.536071	-0.899505	1.44e-05	0.00030768	Down
Acvrl1	381.851	383.274	380.428	0.992328	-0.011111	0.947261	0.979267	Down
Acy1	214.451	246.802	182.1	0.737784	-0.43873	0.0302994	0.147124	Down
Acy3	31.8208	37.2559	26.3858	0.707769	-0.49865	0.267401	0.562452	Down
Acyp1	714.833	702.79	726.876	1.03421	0.0485329	0.747495	0.900132	Up
Acyp2	768.099	808.351	727.847	0.900543	-0.151133	0.368327	0.662651	Down
Ada	35.3304	30.652	40.0088	1.30471	0.383724	0.391042	0.682172	Up
Adal	601.057	577.5	624.615	1.08165	0.113235	0.370487	0.664353	Up
Adam10	3390.39	3415.24	3365.54	0.985432	-0.0211719	0.85584	0.945477	Down
Adam11	6722.72	7040.46	6404.99	0.909703	-0.136532	0.280707	0.57716	Down
Adam12	160.216	130.06	190.371	1.46357	0.549492	0.0132423	0.0809716	Up
Adam15	3262.79	2914.89	3610.7	1.23868	0.308801	0.00243641	0.0223465	Up
Adam17	481.412	460.925	501.898	1.08922	0.12329	0.428158	0.711357	Up
Adam18	11.9574	15.246	8.66871	0.569032	-0.813418	0.265789	0.560581	Down
Adam19	624.487	524.63	724.344	1.38032	0.465001	0.00931124	0.0621885	Up
Adam1a	50.1587	57.3926	42.9247	0.748133	-0.418634	0.285326	0.582505	Down
Adam21	5.46874	5.29542	5.64207	1.06713	0.0937297	0.930132	0.972847	Up
Adam22	5484.56	6004.91	4964.21	0.826672	-0.274613	0.0606026	0.235351	Down
Adam23	4137.22	4550.02	3724.42	0.818521	-0.288908	0.00783331	0.0544757	Down
Adam32	8.65415	7.9735	9.33481	1.17251	0.229596	0.782194	0.913944	Up
Adam33	7.64889	7.22892	8.06886	1.11295	0.154389	0.864726	0.949867	Up
Adam4	5.83548	4.65091	7.02005	1.51103	0.595529	0.555902	0.796213	Up
Adam5	5.82627	5.60297	6.04958	1.07715	0.107225	0.913481	0.966715	Up
Adam8	21.6844	21.898	21.4709	0.980193	-0.0288624	0.958277	0.98429	Down
Adam9	2235.01	2033.55	2436.47	1.19815	0.260815	0.00824166	0.0566415	Up
Adamts1	1155.57	653.878	1657.26	2.53455	1.34173	0.00110591	0.0117937	Up
Adamts10	200.004	228.093	171.916	0.753573	-0.40818	0.0709887	0.260296	Down
Adamts12	11.4712	8.58899	14.3535	1.67087	0.740596	0.306723	0.604678	Up
Adamts13	44.4536	42.8369	46.0703	1.07372	0.10262	0.818888	0.928626	Up
Adamts14	30.9341	32.3455	29.5226	0.911599	-0.133528	0.787274	0.916739	Down
Adamts15	106.404	137.725	75.0818	0.545004	-0.875661	0.00652889	0.0477036	Down
Adamts16	43.9896	46.6847	41.2945	0.885307	-0.17575	0.647081	0.849804	Down
Adamts17	142.733	144.543	140.923	0.974601	-0.0371169	0.875389	0.954296	Down
Adamts18	74.1713	21.0763	127.266	6.02744	2.59155	7.15e-11	4.65e-09	Up
Adamts2	169.64	231.854	107.426	0.463476	-1.10943	0.00058442	0.00711856	Down
Adamts20	306.084	314.392	297.775	0.947166	-0.078311	0.717694	0.88634	Down
Adamts3	642.151	658.393	625.909	0.950519	-0.073212	0.756561	0.904211	Down
Adamts4	926.633	1168.18	685.085	0.586388	-0.770071	2.76e-09	1.41e-07	Down
Adamts5	43.5284	37.9066	49.1502	1.2969	0.375069	0.423728	0.707951	Up
Adamts6	127.47	86.7718	168.167	1.93824	0.954748	0.00141917	0.0144813	Up
Adamts7	6.31986	6.60544	6.03428	0.912219	-0.132549	0.883693	0.957588	Down
Adamts8	184.006	138.525	229.487	1.65609	0.727782	0.00108005	0.0115696	Up
Adamts9	285.812	256.303	315.321	1.23037	0.299093	0.190625	0.469187	Up
Adamtsl1	211.95	231.706	192.194	0.829445	-0.269782	0.291878	0.588464	Down
Adamtsl2	230.127	218.146	242.108	1.10973	0.15021	0.393917	0.684788	Up
Adamtsl3	53.2639	33.3379	73.1899	2.1956	1.13462	0.0039463	0.0325173	Up
Adamtsl4	170.268	145.342	195.194	1.34346	0.425949	0.17352	0.446024	Up
Adamtsl5	85.5194	93.9837	77.0551	0.820198	-0.285956	0.287511	0.584648	Down
Adap1	6957.87	7256.58	6659.15	0.917658	-0.123972	0.22571	0.515291	Down
Adap2	187.312	180.905	193.719	1.07104	0.0990173	0.686146	0.870785	Up
Adar	5496.31	5455.99	5536.62	1.01477	0.0211501	0.856884	0.946109	Up
Adarb1	6181.71	6079.48	6283.94	1.03363	0.0477179	0.680923	0.867521	Up
Adarb2	640.438	718.489	562.386	0.782637	-0.353585	0.0209343	0.112762	Down
Adat1	164.492	165.927	163.058	0.983109	-0.0245766	0.920296	0.969475	Down
Adat2	217.599	166.221	268.977	1.61782	0.694052	0.00105176	0.0113643	Up
Adat3	32.6051	35.0433	30.167	0.860053	-0.217503	0.628735	0.841231	Down
Adck1	1265.15	1298.99	1231.31	0.948003	-0.0770364	0.568498	0.803302	Down
Adck2	645.01	705.26	584.76	0.829168	-0.270263	0.0643924	0.24449	Down
Adck5	283.208	265.912	300.504	1.1301	0.176448	0.286912	0.584065	Up
Adcy1	23788	29230.3	18345.6	0.627616	-0.672046	5.61e-06	0.000136563	Down
Adcy10	1.31918	2.63836	0	0.0698024	-3.84058	0.095508	0.312912	Down
Adcy2	5188.71	4908.06	5469.36	1.11436	0.156211	0.129004	0.373329	Up
Adcy3	2338.76	2232.99	2444.53	1.09464	0.130459	0.27386	0.569933	Up
Adcy4	82.8553	85.5669	80.1436	0.936434	-0.0947504	0.738294	0.896137	Down
Adcy5	4539.32	4311.35	4767.29	1.10573	0.144998	0.201116	0.483257	Up
Adcy6	1156.02	1149.5	1162.53	1.01118	0.0160456	0.91666	0.967704	Up
Adcy7	82.5087	80.8377	84.1797	1.04161	0.0588155	0.841601	0.939292	Up
Adcy8	618.263	815.362	421.164	0.516551	-0.953018	1.13e-09	6.19e-08	Down
Adcy9	4344.6	4598.38	4090.82	0.889591	-0.168786	0.222167	0.51125	Down
Adcyap1	266.121	301.469	230.773	0.765273	-0.385954	0.110999	0.34175	Down
Adcyap1r1	5060.52	5880.98	4240.07	0.72097	-0.47199	2.49e-05	0.000494954	Down
Add1	15961.3	16546.3	15376.3	0.929288	-0.105802	0.23424	0.525364	Down
Add2	11971.1	12993.3	10948.9	0.842646	-0.247001	0.0449428	0.193113	Down
Add3	6014.95	6651.4	5378.51	0.808639	-0.306432	0.0122171	0.0761529	Down
Adgb	16.7253	22.7798	10.6708	0.468476	-1.09395	0.0601107	0.233943	Down
Adgra1	2354.62	2392.5	2316.74	0.968294	-0.0464833	0.776976	0.912434	Down
Adgra2	387.319	408.517	366.121	0.896193	-0.158119	0.441885	0.722415	Down
Adgra3	669.622	732.282	606.963	0.828742	-0.271005	0.0478935	0.201724	Down
Adgrb1	12244.5	10215.3	14273.6	1.39726	0.482601	6.9e-05	0.00118136	Up
Adgrb2	18348	18311.7	18384.3	1.00395	0.00569444	0.951431	0.980704	Up
Adgrb3	4207.64	4646.64	3768.65	0.81101	-0.302209	0.00539663	0.041343	Down
Adgrd1	31.597	28.9776	34.2165	1.1809	0.239884	0.605553	0.826748	Up
Adgre1	181.706	163.378	200.034	1.22482	0.292568	0.253371	0.547735	Up
Adgre5	272.506	277.138	267.875	0.96643	-0.0492636	0.813123	0.926523	Down
Adgrf2	3.97275	1.98315	5.96235	3.01082	1.59016	0.18996	0.468801	Up
Adgrf4	147.897	37.714	258.081	6.84334	2.7747	2.07e-14	2.24e-12	Up
Adgrf5	901.295	977.077	825.514	0.844778	-0.243356	0.174256	0.446721	Down
Adgrg1	2510.37	2267.23	2753.51	1.21449	0.280356	0.038426	0.172873	Up
Adgrg2	35.8671	35.5418	36.1923	1.01663	0.0237904	0.957372	0.983821	Up
Adgrg3	2.98123	2.63836	3.3241	1.2604	0.333876	0.797579	0.920697	Up
Adgrg6	36.8018	34.5737	39.0298	1.12836	0.174231	0.747287	0.899991	Up
Adgrl1	15444.9	15403.4	15486.5	1.00539	0.00775413	0.950062	0.980618	Up
Adgrl2	1367.58	1575.59	1159.58	0.735957	-0.442306	0.00116624	0.0123139	Down
Adgrl3	4718.09	3657.73	5778.45	1.57973	0.659677	2.55e-06	6.9e-05	Up
Adgrl4	763.836	582.864	944.808	1.62103	0.696914	3.12e-05	0.000604525	Up
Adgrv1	87.9513	90.4545	85.4482	0.944433	-0.0824801	0.774912	0.911463	Down
Adh1	9.97537	12.2207	7.73007	0.631214	-0.663798	0.39532	0.685589	Down
Adh5	2499.55	2432.84	2566.27	1.05487	0.077061	0.452636	0.73011	Up
Adh7	3.82954	4.29488	3.36419	0.781369	-0.355924	0.759526	0.90596	Down
Adhfe1	751.634	865.18	638.088	0.737394	-0.439493	0.00329808	0.0282816	Down
Adi1	1114.93	1215.89	1013.97	0.833882	-0.262085	0.0227091	0.119825	Down
Adipoq	1.49575	0.33734	2.65417	7.4772	2.9025	0.177172	0.451136	Up
Adipor1	3399.59	3252.77	3546.41	1.09032	0.124756	0.2262	0.516042	Up
Adipor2	2383.41	2085.89	2680.93	1.28529	0.362095	0.0296064	0.144958	Up
Adk	2413.77	2568.35	2259.2	0.879599	-0.185082	0.145015	0.400143	Down
Adm	107.603	26.7128	188.494	7.05017	2.81766	2.63e-18	4.06e-16	Up
Adnp	120.127	122.964	117.289	0.953719	-0.0683637	0.797321	0.920642	Down
Adnp2	1017.16	980.768	1053.55	1.07416	0.103207	0.378148	0.671674	Up
Ado	2384.3	2596.56	2172.04	0.83652	-0.257528	0.0104743	0.0678392	Down
Adora1	12065	11966.5	12163.5	1.01645	0.0235457	0.814187	0.926943	Up
Adora2a	56.1283	52.8255	59.431	1.12467	0.169499	0.611969	0.83106	Up
Adora2b	144.232	139.96	148.504	1.06167	0.0863377	0.715423	0.885913	Up
Adora3	12.4209	11.5322	13.3097	1.15402	0.206669	0.760646	0.906372	Up
Adpgk	632.539	534.21	730.867	1.36838	0.45247	0.00240313	0.0221126	Up
Adprh	3962.61	3897.81	4027.41	1.03329	0.0472395	0.629591	0.841408	Up
Adprhl1	21.8361	11.5845	32.0877	2.77058	1.47019	0.00777423	0.0541205	Up
Adprhl2	731.925	705.289	758.561	1.0756	0.105144	0.437784	0.719149	Up
Adprm	379.016	372.484	385.547	1.03519	0.0498932	0.734387	0.893866	Up
Adra1a	592.839	481.582	704.096	1.46174	0.547691	0.000174127	0.00258631	Up
Adra1b	199.078	152.747	245.409	1.60601	0.683479	0.00173137	0.0168761	Up
Adra1d	2546.1	2538.78	2553.43	1.00569	0.00818646	0.952828	0.981276	Up
Adra2a	471.691	516.345	427.037	0.8268	-0.274389	0.177022	0.451048	Down
Adra2c	1392.15	998.778	1785.52	1.7879	0.838265	2.22e-06	6.13e-05	Up
Adrb1	742.297	713.518	771.077	1.08054	0.11175	0.461144	0.735755	Up
Adrb2	50.0958	43.4415	56.7501	1.30732	0.386617	0.285298	0.582505	Up
Adrb3	7.46307	10.5603	4.36588	0.412372	-1.27798	0.149909	0.408829	Down
Adrm1	2778.88	2545.33	3012.43	1.18359	0.243171	0.0251534	0.128336	Up
Adsl	818.255	796.151	840.36	1.05558	0.0780299	0.527286	0.779675	Up
Adss	2974.46	3025.81	2923.11	0.965985	-0.0499272	0.682332	0.868438	Down
Adssl1	526.076	508.304	543.848	1.07031	0.0980274	0.566915	0.802397	Up
Adtrp	3.47768	5.94985	1.00551	0.168627	-2.56809	0.0719606	0.262313	Down
Aebp1	489.645	507.437	471.853	0.929875	-0.104891	0.828351	0.933751	Down
Aebp2	2569.69	2523.97	2615.42	1.03625	0.0513766	0.590351	0.816914	Up
Aen	769.545	714.793	824.297	1.15307	0.205486	0.108708	0.338009	Up
Afap1	509.806	530.343	489.268	0.922732	-0.116016	0.487317	0.754317	Down
Afap1l1	428.38	468.593	388.167	0.82838	-0.271636	0.0670029	0.25048	Down
Afap1l2	428.81	435.334	422.286	0.970095	-0.043802	0.819713	0.92898	Down
Afdn	2764	2707.09	2820.91	1.04204	0.0594092	0.684165	0.869493	Up
Aff1	832.445	652.081	1012.81	1.55319	0.635234	2.37e-06	6.46e-05	Up
Aff2	831.772	796.445	867.099	1.0887	0.122612	0.750032	0.901116	Up
Aff3	2126.7	2058.15	2195.26	1.06663	0.0930651	0.500274	0.763091	Up
Aff4	9645.05	9376.69	9913.42	1.05723	0.0802859	0.515711	0.772059	Up
Afg1l	742.209	701.102	783.316	1.1174	0.16014	0.1898	0.468625	Up
Afg3l1	1087.03	990.484	1183.58	1.19507	0.257093	0.0238349	0.123323	Up
Afg3l2	3250.08	3214.55	3285.61	1.02207	0.0314993	0.745652	0.899223	Up
Afmid	82.376	83.3869	81.3651	0.97544	-0.0358748	0.908745	0.965386	Down
Aftph	2889.2	2959.54	2818.87	0.952437	-0.0703049	0.485116	0.752964	Down
Aga	247.804	231.233	264.375	1.1432	0.193083	0.333262	0.631007	Up
Agap1	3711.66	3684.59	3738.74	1.0147	0.0210526	0.875351	0.954296	Up
Agap2	40269.2	40694.2	39844.1	0.979106	-0.0304636	0.748289	0.900398	Down
Agap3	11750.6	12462.6	11038.6	0.885739	-0.175047	0.114032	0.346979	Down
Agbl1	6.41887	7.23009	5.60765	0.776859	-0.364275	0.723108	0.888637	Down
Agbl2	35.6306	42.0238	29.2373	0.696699	-0.521392	0.216672	0.504885	Down
Agbl3	307.064	358.648	255.481	0.712109	-0.48983	0.00467606	0.0369316	Down
Agbl4	289.211	342.03	236.391	0.690806	-0.533647	0.00243502	0.0223465	Down
Agbl5	239.762	228.947	250.577	1.09467	0.130502	0.491291	0.757038	Up
Ager	7.14906	6.95077	7.34736	1.05725	0.0803123	0.930459	0.972847	Up
Agfg1	4143.9	3896.79	4391.01	1.12683	0.172275	0.103381	0.327851	Up
Agfg2	2123.51	2008.86	2238.16	1.11413	0.155922	0.228287	0.518438	Up
Aggf1	2868.65	2715.91	3021.38	1.11249	0.153791	0.0969801	0.31566	Up
Agk	1341.43	1440.92	1241.94	0.861949	-0.214325	0.0540124	0.218409	Down
Agl	1582.33	1511.06	1653.6	1.09432	0.130036	0.274423	0.570584	Up
Agmat	29.737	4.6513	54.8228	11.8153	3.56259	1.87e-07	6.66e-06	Up
Agmo	203.395	215.564	191.226	0.886882	-0.173186	0.39853	0.688087	Down
Ago1	3114.83	3217.62	3012.03	0.936084	-0.0952904	0.443928	0.723649	Down
Ago2	1772.92	1299.41	2246.43	1.72874	0.789722	0.000188322	0.00276618	Up
Ago3	1190.78	1107.52	1274.04	1.15021	0.201891	0.211455	0.498321	Up
Ago4	283.07	330.392	235.749	0.713686	-0.486638	0.0125505	0.077817	Down
Agpat1	4526.06	4494.32	4557.81	1.01414	0.0202615	0.835379	0.936591	Up
Agpat2	51.0045	49.1076	52.9014	1.07874	0.109345	0.770122	0.909816	Up
Agpat3	9529.69	9846.82	9212.56	0.935583	-0.0960629	0.339419	0.636467	Down
Agpat4	2232.12	2054.78	2409.45	1.17257	0.229676	0.0780172	0.275804	Up
Agpat5	2055.65	1873.42	2237.88	1.19458	0.256502	0.0238367	0.123323	Up
Agps	2066.66	2088.74	2044.58	0.97891	-0.0307524	0.775331	0.911537	Down
Agrn	4594.45	4327.32	4861.58	1.12346	0.16795	0.218484	0.507291	Up
Agrp	2.81468	3.30311	2.32624	0.705071	-0.50416	0.718716	0.886564	Down
Agt	1120.73	1046.15	1195.32	1.14264	0.192366	0.604286	0.825867	Up
Agtpbp1	10688.9	10242.1	11135.7	1.08723	0.120656	0.275394	0.57161	Up
Agtr1a	13.9031	18.1575	9.6488	0.531792	-0.911066	0.172189	0.444225	Down
Agtr1b	3.4806	2.96655	3.99464	1.34635	0.429049	0.752686	0.902648	Up
Agtr2	6.2869	8.58743	3.98638	0.4649	-1.10501	0.252877	0.547125	Down
Agtrap	364.56	353.267	375.854	1.06424	0.0898208	0.672093	0.86329	Up
Agxt	2.843	0	5.68599	31.165	4.96185	0.00914454	0.0612808	Up
Ahctf1	1563.36	1586.69	1540.02	0.970501	-0.0431986	0.74445	0.898749	Down
Ahcy	665.477	691.723	639.231	0.924152	-0.113797	0.380756	0.673376	Down
Ahcyl1	16434.3	16627.1	16241.6	0.976806	-0.0338564	0.707805	0.88255	Down
Ahcyl2	8500.91	8324.15	8677.66	1.04246	0.0599869	0.625769	0.839292	Up
Ahdc1	2502.41	2228.94	2775.87	1.24539	0.316602	0.0202477	0.110137	Up
Ahi1	6901.66	7768.12	6035.2	0.776898	-0.364203	0.00149809	0.01512	Down
Ahnak	894.336	851.051	937.622	1.10171	0.139746	0.481762	0.750934	Up
Ahnak2	52.5956	18.8651	86.3262	4.58044	2.19549	4.56e-07	1.51e-05	Up
Ahr	345.167	390.243	300.091	0.768755	-0.379404	0.0367962	0.167741	Down
Ahrr	12.9081	15.8592	9.95699	0.628859	-0.669191	0.309761	0.607853	Down
Ahsa1	5206.17	5236.68	5175.67	0.988364	-0.0168854	0.85502	0.94531	Down
Ahsa2	1076.67	1003.38	1149.95	1.14613	0.196775	0.109037	0.338556	Up
Ahsg	1.54453	0	3.08907	16.9027	4.07918	0.145269	0.400568	Up
Ahsp	2.63433	2.9539	2.31476	0.784348	-0.350435	0.81409	0.926943	Down
Aida	1789.9	1818.26	1761.55	0.968827	-0.0456883	0.661598	0.857725	Down
Aif1	258.823	244.76	272.885	1.1155	0.157692	0.480664	0.750022	Up
Aif1l	256.441	345.204	167.677	0.485924	-1.0412	1.5e-07	5.44e-06	Down
Aifm1	797.269	793.795	800.744	1.00873	0.0125338	0.914893	0.96714	Up
Aifm2	205.63	231.628	179.633	0.775423	-0.366945	0.0569794	0.226041	Down
Aifm3	1135.26	1363.31	907.213	0.665396	-0.587715	6.52e-06	0.0001542	Down
Aig1	1770.54	1879.61	1661.48	0.883951	-0.177961	0.111984	0.343371	Down
Aim2	59.1966	60.7127	57.6805	0.949926	-0.0741125	0.821364	0.929845	Down
Aimp1	1792.22	1752.95	1831.48	1.04484	0.0632756	0.588198	0.816039	Up
Aimp2	850.801	848.33	853.272	1.00587	0.00845089	0.942818	0.977959	Up
Aip	3638.98	3859.55	3418.42	0.885693	-0.175121	0.142105	0.395292	Down
Airn	28.6804	20.4406	36.9201	1.80337	0.850693	0.0869375	0.295579	Up
Ajap1	1512.76	1553.44	1472.08	0.947565	-0.0777038	0.552867	0.794511	Down
Ajm1	3065.36	3519.66	2611.07	0.741785	-0.430927	0.000155938	0.00235302	Down
Ajuba	37.7292	39.7633	35.695	0.898253	-0.154807	0.707041	0.882125	Down
Ak1	4064.31	4207.88	3920.74	0.931782	-0.101935	0.424024	0.708085	Down
Ak2	658.768	569.848	747.688	1.31225	0.392045	0.00653617	0.0477393	Up
Ak3	3810.83	3760.69	3860.97	1.02668	0.0379873	0.730236	0.891831	Up
Ak4	3506.93	3466.15	3547.71	1.02346	0.0334596	0.782244	0.913944	Up
Ak5	13159.6	13361.8	12957.5	0.969734	-0.0443385	0.703364	0.880444	Down
Ak6	344.426	282.953	405.899	1.43498	0.521027	0.00130103	0.0134586	Up
Ak7	85.9173	107.598	64.2363	0.59643	-0.745576	0.0286314	0.141122	Down
Ak8	40.717	53.264	28.17	0.52829	-0.920599	0.0285408	0.140721	Down
Ak9	16.2255	22.3661	10.0849	0.449689	-1.153	0.0910564	0.304383	Down
Akain1	565.271	664.439	466.103	0.701218	-0.512065	0.00146858	0.0148954	Down
Akap1	1409.24	1462.92	1355.55	0.926554	-0.110053	0.424995	0.708669	Down
Akap10	1790.46	1882.58	1698.33	0.902132	-0.14859	0.242089	0.534299	Down
Akap11	10767	11068.5	10465.4	0.945499	-0.080852	0.540267	0.787035	Down
Akap12	846.023	645.234	1046.81	1.62241	0.698135	0.00301951	0.0263962	Up
Akap13	1296.09	1172.89	1419.3	1.21011	0.275133	0.0620053	0.239211	Up
Akap14	4.80447	7.92463	1.68432	0.211576	-2.24075	0.0613101	0.237357	Down
Akap17a	1204.73	1094.41	1315.05	1.20166	0.265034	0.0266127	0.133722	Up
Akap17b	551.28	496.277	606.282	1.22152	0.288673	0.057458	0.227202	Up
Akap3	5.13933	6.26811	4.01056	0.63927	-0.645502	0.518801	0.774214	Down
Akap5	1995.04	2381.36	1608.72	0.67545	-0.566079	0.000134523	0.00208847	Down
Akap6	7096.12	7325.86	6866.37	0.937256	-0.0934848	0.482519	0.751263	Down
Akap7	997.769	1150.8	844.742	0.734013	-0.446122	0.000208083	0.00301636	Down
Akap8	1307.44	1248.7	1366.19	1.09401	0.129629	0.258479	0.553233	Up
Akap8l	1692.99	1550.95	1835.02	1.18307	0.242535	0.0306215	0.148249	Up
Akap9	1976.44	1787.41	2165.47	1.21145	0.276735	0.0745907	0.268362	Up
Akip1	99.6287	123.938	75.3192	0.608172	-0.717448	0.00884908	0.0598042	Down
Akirin1	3420.65	3029.99	3811.3	1.25789	0.331004	0.0013549	0.0139435	Up
Akirin2	3105.1	2710.36	3499.84	1.29135	0.36888	0.000389703	0.00506284	Up
Akna	137.215	117.044	157.386	1.3442	0.426752	0.0762452	0.271852	Up
Aknad1	2.30785	2.61617	1.99954	0.763203	-0.389861	0.831301	0.934926	Down
Akr1a1	12405.5	12598.4	12212.7	0.969385	-0.0448581	0.648908	0.850524	Down
Akr1b10	688.665	658.245	719.084	1.09222	0.127262	0.407074	0.69544	Up
Akr1b3	1281.78	1370.9	1192.66	0.870019	-0.200881	0.0704326	0.258973	Down
Akr1b8	54.1062	20.4655	87.7469	4.28821	2.10037	0.000335193	0.00446543	Up
Akr1c13	3.64292	2.95623	4.32961	1.46276	0.548697	0.671577	0.862898	Up
Akr1c14	49.0012	60.9772	37.0253	0.606122	-0.72232	0.115499	0.349571	Down
Akr1c18	141.836	139.978	143.694	1.02702	0.0384708	0.861644	0.948485	Up
Akr1c19	1.65031	0.32741	2.97322	8.3813	3.06717	0.140525	0.392782	Up
Akr1e1	1087.61	1081.91	1093.32	1.0105	0.0150681	0.890505	0.959796	Up
Akr7a5	996.05	979.029	1013.07	1.03491	0.049508	0.727609	0.89106	Up
Akt1	6425.65	7111.47	5739.83	0.807137	-0.309114	0.00284471	0.0251428	Down
Akt1s1	1977.1	1796.69	2157.51	1.20091	0.26413	0.0246404	0.126396	Up
Akt2	3046.3	3257.22	2835.38	0.870461	-0.200148	0.0658378	0.247801	Down
Akt3	10032.1	11121.8	8942.39	0.804026	-0.314686	0.00275294	0.0245154	Down
Aktip	3294.12	3430.5	3157.74	0.920522	-0.119476	0.234146	0.52533	Down
Alad	814.625	830.012	799.239	0.963011	-0.0543752	0.702882	0.879951	Down
Alas1	2390.03	2175.86	2604.19	1.19683	0.259216	0.00812281	0.056057	Up
Alas2	49.8374	54.7893	44.8855	0.819645	-0.286929	0.480602	0.750022	Down
Alb	8.46098	9.82172	7.10024	0.7209	-0.472129	0.689425	0.872557	Down
Alcam	4367.95	4996.85	3739.05	0.748255	-0.418397	0.000458365	0.00578493	Down
Aldh16a1	204.492	168.204	240.78	1.43162	0.51765	0.00438259	0.0352004	Up
Aldh18a1	940.813	725.71	1155.92	1.59302	0.671761	1.27e-05	0.000275862	Up
Aldh1a1	2163.78	2248.8	2078.75	0.924397	-0.113415	0.538688	0.786561	Down
Aldh1a2	240.565	250.309	230.821	0.921988	-0.11718	0.713084	0.885223	Down
Aldh1a3	86.6009	22.0765	151.125	6.84208	2.77444	2.27e-08	9.63e-07	Up
Aldh1a7	10.1592	10.5404	9.77797	0.92495	-0.112553	0.88897	0.95932	Down
Aldh1b1	564.004	555.723	572.285	1.02995	0.0425742	0.743394	0.898026	Up
Aldh1l1	2654.55	2054.7	3254.41	1.5839	0.663481	0.128356	0.372184	Up
Aldh1l2	248.228	102.225	394.23	3.858	1.94785	1.57e-10	9.87e-09	Up
Aldh2	3228.51	3755.22	2701.8	0.719466	-0.475001	0.000120037	0.0018916	Down
Aldh3a1	34.858	41.623	28.093	0.674547	-0.56801	0.200488	0.482447	Down
Aldh3a2	1926.46	2092.72	1760.21	0.841069	-0.249704	0.0183502	0.102938	Down
Aldh3b1	162.027	168.541	155.512	0.923058	-0.115507	0.599061	0.822747	Down
Aldh3b2	31.8466	33.3714	30.3218	0.908941	-0.137742	0.739376	0.896553	Down
Aldh4a1	889.026	986.242	791.809	0.802822	-0.316848	0.00995754	0.0652568	Down
Aldh5a1	4063.15	4333	3793.3	0.87545	-0.191903	0.0489662	0.204699	Down
Aldh6a1	2746.64	3134.49	2358.78	0.752514	-0.41021	0.000137899	0.00212926	Down
Aldh7a1	3211.56	3352.57	3070.56	0.915911	-0.126721	0.245829	0.539144	Down
Aldh9a1	1169.83	1300.1	1039.56	0.799543	-0.322753	0.0062071	0.045994	Down
Aldoa	95592	85828.9	105355	1.2275	0.295726	0.00287021	0.0252993	Up
Aldoart1	4.34057	5.33669	3.34445	0.627497	-0.672319	0.556945	0.796842	Down
Aldoart2	6.10819	4.5818	7.63458	1.66376	0.73445	0.50087	0.763243	Up
Aldob	10.4808	12.8724	8.08922	0.626465	-0.674694	0.370477	0.664353	Down
Aldoc	38381.9	38784.3	37979.4	0.979245	-0.0302583	0.824463	0.931807	Down
Alg1	757.726	848.602	666.849	0.78588	-0.347619	0.00941645	0.0626651	Down
Alg10b	1026.52	1053.94	999.106	0.947858	-0.0772579	0.682788	0.868633	Down
Alg11	1331.39	1458.42	1204.36	0.825762	-0.276202	0.0195735	0.108004	Down
Alg12	313.244	305.05	321.437	1.05388	0.0757108	0.632114	0.843055	Up
Alg13	99.9221	107.224	92.6203	0.864334	-0.210338	0.424284	0.70831	Down
Alg14	477.477	494.325	460.63	0.932097	-0.101448	0.514207	0.771317	Down
Alg2	6437.76	6746.2	6129.32	0.90856	-0.138346	0.192472	0.471536	Down
Alg3	285.843	286.893	284.794	0.992838	-0.0103691	0.948919	0.979937	Down
Alg5	559.518	576.669	542.366	0.940566	-0.0883997	0.508704	0.768015	Down
Alg6	298.708	300.453	296.963	0.988066	-0.0173208	0.934006	0.974039	Down
Alg8	188.092	161.155	215.03	1.33481	0.416636	0.0519495	0.212703	Up
Alg9	767.603	827.407	707.798	0.855508	-0.225147	0.10051	0.322394	Down
Alk	185.898	176.216	195.579	1.10988	0.150406	0.469817	0.742181	Up
Alkal2	141.268	106.201	176.335	1.6607	0.731789	0.0364981	0.166763	Up
Alkbh1	321.496	251.391	391.601	1.55804	0.639734	0.000307153	0.00415869	Up
Alkbh2	95.7896	83.2809	108.298	1.30078	0.37938	0.13596	0.38578	Up
Alkbh3	292.459	264.563	320.356	1.21133	0.276598	0.163768	0.431946	Up
Alkbh4	235.76	227.556	243.964	1.07222	0.100595	0.593674	0.81941	Up
Alkbh5	2628.79	2303.01	2954.57	1.28294	0.359455	0.000990685	0.0108817	Up
Alkbh6	1112.89	1152.45	1073.34	0.931392	-0.10254	0.403408	0.692006	Down
Alkbh7	507.123	549.076	465.169	0.847347	-0.238976	0.100054	0.321638	Down
Alkbh8	1682.96	1649.02	1716.91	1.04111	0.0581218	0.684096	0.869493	Up
Alms1	160.622	187.974	133.27	0.709203	-0.49573	0.0196141	0.10806	Down
Alox12	10.2709	15.1341	5.40766	0.355564	-1.49182	0.0722808	0.262951	Down
Alox12b	115.687	156.654	74.7213	0.477196	-1.06734	3.05e-05	0.000593624	Down
Alox12e	2.63984	4.94853	0.331139	0.0724862	-3.78615	0.0332989	0.156826	Down
Alox15	52.123	42.5823	61.6638	1.448	0.534066	0.125499	0.367957	Up
Alox5	14.5069	14.2408	14.7731	1.03651	0.051732	0.937964	0.976171	Up
Alox5ap	178.314	160.087	196.54	1.22857	0.296977	0.19966	0.481268	Up
Alox8	106.351	128.97	83.7325	0.64938	-0.622866	0.0119452	0.0748566	Down
Aloxe3	243.861	283.034	204.689	0.722913	-0.468107	0.0282206	0.139443	Down
Alpk1	134.462	125.615	143.309	1.14064	0.189844	0.470457	0.742663	Up
Alpk2	8.31425	6.29828	10.3302	1.64169	0.715181	0.456123	0.732528	Up
Alpk3	12.0907	10.8793	13.3021	1.22287	0.290267	0.673196	0.863925	Up
Alpl	232.698	240.296	225.1	0.936648	-0.0944205	0.648573	0.850399	Down
Als2	2028.77	2032.74	2024.79	0.996079	-0.00566756	0.968361	0.989704	Down
Als2cl	167.531	195.719	139.343	0.712083	-0.489883	0.0675629	0.251676	Down
Alx3	6.30581	7.58729	5.02433	0.661147	-0.596956	0.511252	0.769523	Down
Alx4	35.7966	38.8344	32.7588	0.8429	-0.246566	0.643791	0.848399	Down
Alyref	829.593	723.854	935.331	1.29233	0.369974	0.00278146	0.0247251	Up
Alyref2	124.622	131.399	117.846	0.896617	-0.157436	0.506735	0.766845	Down
Amacr	415.76	420.648	410.872	0.976966	-0.03362	0.815586	0.927506	Down
Ambra1	2156.87	2223.43	2090.32	0.940137	-0.0890573	0.437897	0.719156	Down
Amd1	4364.02	4346.79	4381.25	1.0079	0.0113519	0.911854	0.966072	Up
Amd2	47.1274	61.1948	33.06	0.539985	-0.88901	0.0908635	0.303942	Down
Amdhd1	4.11894	6.92098	1.31691	0.191487	-2.38468	0.0680876	0.253062	Down
Amdhd2	428.056	454.934	401.177	0.881743	-0.181571	0.248917	0.542904	Down
Amer1	237.195	256.894	217.497	0.846467	-0.240474	0.25058	0.544941	Down
Amer2	3004.86	3227.6	2782.12	0.861968	-0.214293	0.0474459	0.200397	Down
Amer3	1622.32	1894.88	1349.77	0.712293	-0.489456	3.7e-05	0.00070061	Down
Amfr	7399.96	7427.78	7372.14	0.992517	-0.0108358	0.900928	0.963316	Down
Amh	9.95629	12.9244	6.98822	0.541506	-0.884951	0.241579	0.533776	Down
Amhr2	14.99	16.5621	13.4179	0.809527	-0.304849	0.640953	0.847429	Down
Amigo1	3283.73	3712.24	2855.23	0.769091	-0.378774	0.000529999	0.00658383	Down
Amigo2	956.16	983.502	928.819	0.944311	-0.0826657	0.611713	0.830882	Down
Amigo3	89.1792	43.3808	134.978	3.11424	1.63888	5.62e-09	2.66e-07	Up
Ammecr1	67.5827	72.9088	62.2566	0.854064	-0.227584	0.464959	0.738323	Down
Ammecr1l	1312.92	1202.81	1423.03	1.1831	0.24257	0.0457021	0.195405	Up
Amn	157.58	191.758	123.401	0.643875	-0.635148	0.0433398	0.188093	Down
Amn1	494.236	462.715	525.757	1.13634	0.184398	0.17267	0.44476	Up
Amot	1035.08	1078.25	991.911	0.919905	-0.120443	0.288916	0.58597	Down
Amotl1	653.868	598.476	709.261	1.18517	0.245098	0.232451	0.523001	Up
Amotl2	522.651	591.384	453.918	0.767695	-0.381394	0.0411957	0.181478	Down
Ampd2	2374.35	2236.65	2512.06	1.12314	0.167536	0.0877199	0.297477	Up
Ampd3	932.315	731.009	1133.62	1.55108	0.633269	0.000516336	0.00643497	Up
Amph	11742	11002.3	12481.8	1.13445	0.181996	0.0847456	0.290926	Up
Amt	623.194	616.041	630.347	1.02351	0.0335287	0.835054	0.936485	Up
Amy1	135.602	178.45	92.7539	0.519339	-0.945252	7.69e-05	0.00129634	Down
Amy2a1	2.95576	5.58038	0.331139	0.0642484	-3.9602	0.035517	0.163678	Down
Amy2a3	18.1499	36.2997	0	0.00507507	-7.62236	0.051193	0.210783	Down
Amy2b	85.3586	170.717	0	0.00107913	-9.85592	0.00333528	0.0284916	Down
Amz1	378.484	274.802	482.167	1.75403	0.810671	5.47e-05	0.000971324	Up
Amz2	1804.07	1863.7	1744.43	0.936023	-0.0953846	0.366175	0.660562	Down
Anapc1	2871.04	2901.62	2840.46	0.978885	-0.0307893	0.799714	0.92139	Down
Anapc10	464.813	432.655	496.971	1.14888	0.200223	0.179284	0.453867	Up
Anapc11	2078.01	2178.6	1977.41	0.9077	-0.139712	0.21061	0.497481	Down
Anapc13	937.718	1011.1	864.331	0.854845	-0.226266	0.113717	0.346548	Down
Anapc15	586.508	610.272	562.744	0.922153	-0.116921	0.363067	0.657754	Down
Anapc16	2341.35	2253.64	2429.06	1.07785	0.10816	0.435664	0.717503	Up
Anapc2	3053.72	3240.05	2867.38	0.884988	-0.17627	0.0925268	0.3075	Down
Anapc4	2025.54	1933.71	2117.37	1.09498	0.130911	0.19355	0.47255	Up
Anapc5	5250.16	5248.11	5252.21	1.00079	0.00113704	0.990455	0.997563	Up
Anapc7	1327.05	1361.99	1292.11	0.948753	-0.0758962	0.498871	0.762131	Down
Ang	25.4311	23.1946	27.6676	1.19376	0.255508	0.628162	0.840957	Up
Angel1	271.921	287.524	256.318	0.891312	-0.165998	0.36761	0.66195	Down
Angel2	1876.99	1871.57	1882.41	1.00574	0.00825759	0.939599	0.976851	Up
Angpt1	312.567	259.803	365.331	1.40659	0.492204	0.0153054	0.0901239	Up
Angpt2	85.6506	26.9853	144.316	5.3416	2.41727	7.55e-12	5.65e-10	Up
Angpt4	2.6505	2.97414	2.32686	0.7831	-0.352732	0.819331	0.928812	Down
Angptl1	31.8967	28.0144	35.779	1.27586	0.351465	0.442256	0.722592	Up
Angptl2	129.426	115.162	143.689	1.24856	0.32026	0.389887	0.681054	Up
Angptl3	4.80645	3.29201	6.32088	1.91881	0.940214	0.381339	0.673814	Up
Angptl4	96.745	91.3048	102.185	1.11927	0.162553	0.528504	0.780107	Up
Angptl6	314.261	304.117	324.405	1.06699	0.0935475	0.630239	0.841856	Up
Angptl7	4.30105	3.97701	4.62509	1.16658	0.222287	0.8463	0.941647	Up
Ank	6895.14	7952.3	5837.97	0.734117	-0.445918	6.11e-06	0.000146281	Down
Ank1	1458.83	1427.24	1490.42	1.0442	0.0623933	0.640462	0.847265	Up
Ank2	17547.7	17076.9	18018.5	1.05513	0.0774169	0.547345	0.790787	Up
Ank3	10623.1	10241.9	11004.3	1.07443	0.103574	0.4426	0.722648	Up
Ankdd1a	35.3342	35.3259	35.3424	1.00046	0.000667804	0.998901	0.999504	Up
Ankdd1b	5.97795	3.69088	8.26503	2.25062	1.17032	0.320625	0.618813	Up
Ankef1	9.41699	12.1699	6.66411	0.547377	-0.869394	0.290561	0.587284	Down
Ankfn1	15.8881	19.7599	12.0164	0.607753	-0.718444	0.290263	0.587056	Down
Ankfy1	1854.32	1891.75	1816.89	0.960396	-0.058298	0.63412	0.843865	Down
Ankhd1	1410.36	1403.37	1417.35	1.00996	0.0143026	0.909581	0.965461	Up
Ankib1	2249.29	2199.85	2298.72	1.04492	0.0633978	0.53236	0.782796	Up
Ankle1	3.15335	3.62896	2.67773	0.73689	-0.440479	0.729376	0.89153	Down
Ankle2	1276.83	1255.25	1298.4	1.0344	0.0487974	0.688147	0.871895	Up
Ankmy1	8.65224	7.64803	9.65645	1.26496	0.339097	0.698205	0.876743	Up
Ankmy2	1977.53	1862.62	2092.43	1.12342	0.167893	0.0883429	0.298727	Up
Ankra2	1451.22	1520.07	1382.37	0.909481	-0.136885	0.215283	0.50344	Down
Ankrd1	15.0856	10.265	19.9062	1.93673	0.953626	0.157935	0.4221	Up
Ankrd10	1030	1028.69	1031.32	1.00244	0.00351714	0.978616	0.994185	Up
Ankrd11	5660.17	5635.02	5685.31	1.00891	0.012798	0.923271	0.97011	Up
Ankrd12	2043.66	2131.56	1955.75	0.91746	-0.124283	0.378987	0.672369	Down
Ankrd13a	1625.21	1559.48	1690.93	1.08438	0.116875	0.387916	0.679579	Up
Ankrd13b	2431.76	2291.81	2571.71	1.12214	0.166253	0.165967	0.434867	Up
Ankrd13c	4081.68	3612.05	4551.3	1.26006	0.333487	0.000349758	0.00462079	Up
Ankrd13d	1352.14	1456.08	1248.21	0.857153	-0.222375	0.056718	0.225501	Down
Ankrd16	302.963	282.617	323.309	1.14405	0.19415	0.265465	0.560441	Up
Ankrd17	4705.82	4487.72	4923.92	1.09718	0.133804	0.267231	0.562349	Up
Ankrd2	8.43716	7.88335	8.99097	1.13931	0.188162	0.820358	0.929182	Up
Ankrd22	3.14918	1.31918	4.97918	3.77418	1.91616	0.246207	0.539616	Up
Ankrd23	57.9354	60.9343	54.9366	0.902446	-0.148088	0.65439	0.853662	Down
Ankrd24	589.352	660.924	517.78	0.78319	-0.352566	0.0214958	0.11507	Down
Ankrd26	437.284	437.289	437.279	0.999793	-0.000298958	0.998571	0.999363	Down
Ankrd27	955.778	1046.28	865.28	0.827051	-0.273952	0.0223284	0.118255	Down
Ankrd28	2505.04	2387.38	2622.71	1.09855	0.135602	0.180861	0.45615	Up
Ankrd29	858.646	886.052	831.24	0.938102	-0.0921841	0.445189	0.724201	Down
Ankrd31	4.13871	4.64254	3.63488	0.785107	-0.349039	0.792025	0.918041	Down
Ankrd33b	4635.47	3036.51	6234.42	2.05307	1.03778	1.2e-17	1.7e-15	Up
Ankrd34a	2317.4	2395.7	2239.11	0.934684	-0.0974487	0.448977	0.727213	Down
Ankrd34b	828.118	926.829	729.407	0.787043	-0.345486	0.0130623	0.0801787	Down
Ankrd34c	59.7195	70.629	48.8101	0.691638	-0.531911	0.156598	0.419766	Down
Ankrd35	316.662	326.307	307.018	0.940769	-0.0880876	0.582683	0.8115	Down
Ankrd37	141.484	126.941	156.027	1.22963	0.298223	0.28122	0.577498	Up
Ankrd39	178.022	209.223	146.822	0.701964	-0.51053	0.0126672	0.0783694	Down
Ankrd40	5531.9	5797.52	5266.28	0.908377	-0.138637	0.151726	0.411363	Down
Ankrd42	383.665	352.598	414.732	1.17634	0.234311	0.172358	0.444358	Up
Ankrd44	256.292	284.041	228.542	0.804943	-0.313042	0.113	0.345263	Down
Ankrd45	1768.28	1868.11	1668.46	0.893128	-0.163061	0.169504	0.439848	Down
Ankrd46	11627.4	12195.7	11059	0.906777	-0.14118	0.20359	0.487182	Down
Ankrd49	454.79	463.775	445.805	0.961201	-0.0570903	0.723221	0.888644	Down
Ankrd50	1992	1415.41	2568.6	1.81462	0.859671	5.01e-09	2.42e-07	Up
Ankrd52	2044.31	1786.79	2301.83	1.28819	0.365343	0.0222501	0.117934	Up
Ankrd54	557.419	511.016	603.823	1.18183	0.241026	0.12926	0.373934	Up
Ankrd55	167.213	129.6	204.825	1.57945	0.659427	0.00343437	0.0291427	Up
Ankrd6	1109.12	1150.33	1067.91	0.928202	-0.107489	0.444302	0.723649	Down
Ankrd61	2.30406	2.28954	2.31859	1.01205	0.0172753	0.991662	0.997929	Up
Ankrd63	473.034	774.876	171.191	0.220874	-2.17871	2.42e-05	0.000483769	Down
Ankrd66	13.6202	15.9505	11.2898	0.709494	-0.495137	0.465403	0.738331	Down
Ankrd7	16.0998	22.5425	9.65707	0.428947	-1.22113	0.0513036	0.211057	Down
Ankrd9	341.218	346.688	335.749	0.968753	-0.0457994	0.770533	0.909927	Down
Anks1	1126.04	1038.06	1214.01	1.16951	0.225903	0.0741911	0.267612	Up
Anks1b	12553.9	13228.6	11879.2	0.897973	-0.155256	0.120814	0.359532	Down
Anks3	885.589	843.018	928.161	1.10092	0.138712	0.341098	0.637827	Up
Anks4b	7.33788	7.94293	6.73283	0.846088	-0.24112	0.790983	0.917851	Down
Anks6	224.127	253.696	194.559	0.766847	-0.382989	0.0446746	0.19225	Down
Ankub1	23.6955	34.7009	12.6901	0.365614	-1.45161	0.00373387	0.0311594	Down
Ankzf1	375.96	391.174	360.745	0.922151	-0.116925	0.451625	0.729247	Down
Anln	999.219	1175.66	822.778	0.699681	-0.515231	0.00041479	0.00532617	Down
Ano1	38.9018	46.0948	31.7088	0.687473	-0.540625	0.219631	0.508543	Down
Ano10	659.99	700.231	619.749	0.885	-0.17625	0.174006	0.446332	Down
Ano2	71.6974	95.2187	48.1761	0.505006	-0.985628	0.0151668	0.0896807	Down
Ano3	5659.32	5505.09	5813.55	1.05605	0.0786753	0.60111	0.823905	Up
Ano4	692.222	726.258	658.186	0.906291	-0.141954	0.314814	0.613206	Down
Ano5	29.3357	32.6085	26.0629	0.798489	-0.324656	0.484766	0.752931	Down
Ano6	789.849	742.206	837.492	1.12841	0.174292	0.199404	0.481176	Up
Ano7	7.1603	3.63889	10.6817	2.93622	1.55396	0.13426	0.383224	Up
Ano8	1471.6	1465.82	1477.38	1.00785	0.0112782	0.928043	0.971988	Up
Anp32a	8937.39	8355.27	9519.52	1.13932	0.188179	0.101881	0.324957	Up
Anp32b	1716.13	1813.33	1618.94	0.892865	-0.163485	0.127133	0.37029	Down
Anp32e	3799.75	3576.65	4022.86	1.1248	0.169669	0.10489	0.330503	Up
Anpep	83.4405	97.3642	69.5167	0.713703	-0.486605	0.159093	0.424306	Down
Antkmt	1577.09	1695.43	1458.74	0.860458	-0.216823	0.088646	0.29924	Down
Antxr1	403.131	392.335	413.927	1.05533	0.0776981	0.638408	0.846179	Up
Antxr2	66.106	66.3161	65.8958	0.993848	-0.00890283	0.978221	0.994053	Down
Anxa1	81.5435	92.2203	70.8668	0.768995	-0.378954	0.199726	0.481312	Down
Anxa11	2839.99	2284.94	3395.05	1.48584	0.571279	5.69e-06	0.000138563	Up
Anxa2	666.728	435.166	898.289	2.06457	1.04584	2.58e-07	9.01e-06	Up
Anxa3	436.274	408.803	463.745	1.13446	0.182	0.240392	0.532205	Up
Anxa4	183.186	137.942	228.431	1.65686	0.728451	0.000496687	0.00622124	Up
Anxa5	2077.6	1811.89	2343.31	1.29339	0.371155	0.0341907	0.159442	Up
Anxa6	4680.49	4503.51	4857.47	1.0786	0.109157	0.354013	0.650196	Up
Anxa7	3500.34	3946.94	3053.75	0.773691	-0.37017	8.03e-05	0.00134448	Down
Anxa8	14.0987	12.21	15.9874	1.30941	0.388916	0.540831	0.787035	Up
Anxa9	14.9261	15.8878	13.9643	0.880105	-0.184253	0.764115	0.907427	Down
Aoah	2.15922	1.98393	2.33451	1.1771	0.235242	0.875355	0.954296	Up
Aoc1	2.65055	4.96995	0.331139	0.0722178	-3.7915	0.03631	0.166133	Down
Aoc2	107.678	88.3748	126.981	1.43594	0.521991	0.0609513	0.236359	Up
Aoc3	19.5482	23.458	15.6385	0.667139	-0.583941	0.317695	0.615871	Down
Aopep	773.617	702.55	844.684	1.20207	0.265518	0.0629896	0.241421	Up
Aox1	158.391	155.618	161.163	1.03599	0.0510125	0.82233	0.93041	Up
Aox3	53.7929	57.8595	49.7264	0.859489	-0.218449	0.589638	0.816695	Down
Aox4	13.2212	12.5461	13.8962	1.10942	0.14981	0.826945	0.933262	Up
Ap1ar	3446.94	3661.34	3232.54	0.882882	-0.179708	0.0595606	0.232843	Down
Ap1b1	6848.65	6921.59	6775.71	0.978918	-0.0307397	0.789987	0.917594	Down
Ap1g1	3948.2	3935.66	3960.75	1.00636	0.00914304	0.936071	0.975318	Up
Ap1g2	52.6353	67.5111	37.7596	0.559247	-0.838442	0.013774	0.0834022	Down
Ap1m1	2338.63	2469.74	2207.52	0.893857	-0.161883	0.163095	0.430962	Down
Ap1m2	13.84	8.92438	18.7556	2.10037	1.07064	0.1167	0.35176	Up
Ap1s1	11279.1	9811.29	12746.8	1.29919	0.377616	0.000220036	0.00315289	Up
Ap1s2	2095.02	2066.92	2123.13	1.02718	0.038688	0.743501	0.898026	Up
Ap1s3	59.2891	65.7105	52.8676	0.805081	-0.312795	0.359883	0.65527	Down
Ap2a1	10198.2	9628.06	10768.4	1.11844	0.161486	0.11286	0.344994	Up
Ap2a2	12821	10984.1	14657.8	1.33445	0.416241	1.83e-05	0.000378565	Up
Ap2b1	22215.5	18496.6	25934.3	1.40211	0.487599	1.01e-06	3.05e-05	Up
Ap2m1	18365.1	17370.8	19359.3	1.11448	0.156366	0.0757594	0.270707	Up
Ap2s1	5789.17	5833.15	5745.18	0.984918	-0.021925	0.854451	0.9451	Down
Ap3b1	2019.06	1895.71	2142.41	1.13013	0.176489	0.0774154	0.274261	Up
Ap3b2	6056.05	5717.18	6394.92	1.11852	0.161587	0.0933216	0.309048	Up
Ap3d1	6384.94	6219.58	6550.29	1.05317	0.0747394	0.423433	0.707592	Up
Ap3m1	2147.18	2167.62	2126.73	0.981074	-0.0275668	0.808131	0.925446	Down
Ap3m2	5827.14	6305.87	5348.41	0.848148	-0.237612	0.0205573	0.111334	Down
Ap3s1	2505.2	2262.03	2748.37	1.21505	0.281018	0.00875196	0.0593089	Up
Ap3s2	3058.09	3193.68	2922.5	0.915031	-0.128107	0.232277	0.522846	Down
Ap4b1	546.903	544.97	548.835	1.0072	0.0103548	0.94111	0.9777	Up
Ap4e1	365.087	350.95	379.224	1.08061	0.111846	0.527176	0.779675	Up
Ap4m1	607.142	626.143	588.142	0.939333	-0.0902916	0.475907	0.746757	Down
Ap4s1	1477.99	1527.42	1428.57	0.935298	-0.0965016	0.473251	0.744829	Down
Ap5b1	98.1946	117.1	79.2896	0.677169	-0.562411	0.0365448	0.166799	Down
Ap5m1	1080.85	1100.95	1060.76	0.96346	-0.0537032	0.645649	0.849343	Down
Ap5s1	522.343	536.767	507.92	0.946353	-0.0795502	0.565932	0.801767	Down
Ap5z1	503.512	518.171	488.852	0.943516	-0.0838805	0.557272	0.796967	Down
Apaf1	815.219	902.652	727.785	0.806176	-0.310833	0.040498	0.179477	Down
Apba1	6155.5	6495.54	5815.47	0.895296	-0.159564	0.0735422	0.265646	Down
Apba2	8858.74	8416.72	9300.77	1.10502	0.144078	0.227825	0.517871	Up
Apba3	630.807	589.491	672.122	1.14031	0.189426	0.247799	0.541615	Up
Apbb1	18420.5	17091.5	19749.4	1.15552	0.208538	0.0309649	0.149312	Up
Apbb1ip	199.928	221.305	178.552	0.806949	-0.30945	0.0944351	0.310977	Down
Apbb2	1450.7	1344.56	1556.84	1.15781	0.211404	0.0645201	0.24471	Up
Apbb3	1172.37	1137.94	1206.81	1.06055	0.0848137	0.470964	0.743052	Up
Apc	9697.31	9467.48	9927.15	1.04854	0.0683753	0.568191	0.803118	Up
Apc2	3683.17	4048.69	3317.66	0.819436	-0.287297	0.0557501	0.223062	Down
Apcdd1	1123.13	1232.47	1013.78	0.822534	-0.281852	0.0840093	0.28923	Down
Apeh	581.799	608.155	555.442	0.913483	-0.130551	0.369444	0.663753	Down
Apela	14.3091	9.27321	19.3451	2.0836	1.05908	0.240715	0.532682	Up
Apex1	1964.58	1923.72	2005.44	1.04253	0.0600918	0.58257	0.811482	Up
Apex2	145.334	131.86	158.808	1.20495	0.268972	0.266098	0.560676	Up
Aph1a	1138.23	1091.67	1184.79	1.08541	0.118245	0.299205	0.595888	Up
Aph1b	1564.52	1690.82	1438.22	0.850574	-0.233491	0.0841778	0.289607	Down
Aph1c	261.992	318.913	205.071	0.64297	-0.637176	0.00566276	0.0428539	Down
Api5	3867.63	3885.74	3849.53	0.990724	-0.0134444	0.888995	0.95932	Down
Apip	414.248	370.415	458.081	1.23698	0.306826	0.0592473	0.232061	Up
Aplf	185.278	176.272	194.283	1.1022	0.140392	0.48217	0.750978	Up
Apln	562.546	655.133	469.96	0.717405	-0.479139	0.00478318	0.0376135	Down
Aplnr	13.1222	11.188	15.0565	1.34364	0.426147	0.541299	0.787189	Up
Aplp1	50487.7	50463.6	50511.8	1.00095	0.0013767	0.988326	0.997257	Up
Aplp2	15979.3	16617.7	15340.8	0.923156	-0.115353	0.290502	0.587229	Down
Apmap	2497.03	2486.22	2507.85	1.00873	0.0125333	0.908618	0.965386	Up
Apoa1	11.091	13.5375	8.64453	0.639158	-0.645755	0.361574	0.656607	Down
Apoa2	46.9897	52.3965	41.583	0.794677	-0.33156	0.391385	0.682694	Down
Apob	2.64886	0.664361	4.63335	7.00356	2.80809	0.0914936	0.305178	Up
Apobec1	63.0995	49.3877	76.8113	1.5571	0.638866	0.146446	0.402308	Up
Apobec2	10.0032	12.289	7.71736	0.627684	-0.671889	0.414526	0.700723	Down
Apobec3	111.674	90.4291	132.919	1.47096	0.556757	0.0371708	0.168945	Up
Apobr	26.221	27.1878	25.2542	0.930424	-0.10404	0.83256	0.935416	Down
Apoc1	35.7675	47.4061	24.1288	0.508691	-0.975139	0.0414687	0.182277	Down
Apoc3	6.38197	4.66201	8.10192	1.73786	0.797312	0.441516	0.722134	Up
Apod	4261.72	4744.32	3779.11	0.796565	-0.328136	0.090095	0.302194	Down
Apoe	50440.8	56351.3	44530.3	0.790226	-0.339664	0.0137315	0.0832364	Down
Apof	9.43614	9.92647	8.94581	0.902651	-0.14776	0.870234	0.952074	Down
Apoh	12.1103	9.91615	14.3044	1.4434	0.529468	0.478746	0.7488	Up
Apol10b	16.225	14.4674	17.9825	1.24195	0.312611	0.611053	0.830349	Up
Apol7a	3.97208	3.99726	3.9469	0.991951	-0.0116595	0.992904	0.998324	Down
Apol7d	2.6505	4.2834	1.0176	0.235676	-2.08512	0.182853	0.458572	Down
Apol8	143.228	175.338	111.119	0.633684	-0.658163	0.00597592	0.0447812	Down
Apol9a	7.15055	7.63577	6.66534	0.873907	-0.194449	0.843408	0.94057	Down
Apol9b	10.4794	12.3379	8.62096	0.700462	-0.513621	0.573264	0.806324	Down
Apold1	560.528	117.101	1003.95	8.57647	3.10038	4.94e-60	4.1e-57	Up
Apom	1.32472	0.327021	2.32241	6.543	2.70995	0.221953	0.51102	Up
Apoo	1700.66	1648.77	1752.54	1.06288	0.0879802	0.500875	0.763243	Up
Apool	152.49	152.215	152.765	1.00354	0.00509249	0.980528	0.995141	Up
App	59847.8	61009.9	58685.8	0.961904	-0.0560352	0.607929	0.828175	Down
Appbp2	1283	1224.21	1341.79	1.09602	0.132271	0.419896	0.704961	Up
Appbp2os	5.64228	4.95924	6.32532	1.2764	0.352079	0.709943	0.883621	Up
Appl1	3780	3768.27	3791.72	1.00617	0.00888	0.93811	0.976264	Up
Appl2	2198.95	2585.12	1812.77	0.701249	-0.512001	0.000412231	0.00530015	Down
Aprt	1381.52	1110.64	1652.39	1.48786	0.573237	2.27e-05	0.000457007	Up
Aptx	979.147	986.143	972.151	0.985775	-0.0206698	0.861563	0.948485	Down
Aqp1	164.989	102.507	227.472	2.21975	1.1504	0.00159069	0.0188581	Up
Aqp11	479.034	638.073	319.996	0.501246	-0.99641	6.34e-07	2.02e-05	Down
Aqp4	6808.12	6205.61	7410.63	1.19421	0.256057	0.174781	0.447321	Up
Aqp5	5.30979	4.968	5.65157	1.13913	0.187935	0.860064	0.947675	Up
Aqp9	43.3422	52.2185	34.466	0.659585	-0.60037	0.124512	0.366377	Down
Aqr	1301.74	1302.98	1300.49	0.998165	-0.00264942	0.982057	0.995714	Down
Ar	844.152	1098.12	590.184	0.537368	-0.896018	2.96e-10	1.79e-08	Down
Araf	6572	6942.33	6201.68	0.893303	-0.162778	0.0827178	0.286513	Down
Arap1	500.925	501.72	500.13	0.996975	-0.0043709	0.980515	0.995141	Down
Arap2	2516.64	2815.7	2217.58	0.787606	-0.344453	0.00719568	0.0512766	Down
Arap3	289.968	271.132	308.804	1.13893	0.187675	0.266063	0.560663	Up
Arc	31070.9	5739.5	56402.3	9.82723	3.29678	1.12e-113	3.19e-110	Up
Arcn1	5781.12	5673.06	5889.18	1.03811	0.0539582	0.573807	0.806803	Up
Areg	21.5013	2.62765	40.3749	15.2973	3.9352	1.89e-08	8.16e-07	Up
Arel1	4787.89	5162.79	4412.98	0.854752	-0.226422	0.0480353	0.202039	Down
Arf1	23515.9	24391.7	22640.1	0.928185	-0.107515	0.28278	0.579386	Down
Arf2	2123.86	2050.88	2196.83	1.07113	0.0991305	0.355992	0.651925	Up
Arf3	44548.9	45950.6	43147.2	0.938989	-0.0908203	0.27691	0.573083	Down
Arf4	6009.57	5358.45	6660.7	1.24305	0.313889	0.00185665	0.017947	Up
Arf5	5016.15	4877.82	5154.48	1.05674	0.0796199	0.475691	0.746702	Up
Arf6	2129.14	1926.54	2331.73	1.21031	0.275377	0.00473604	0.0372869	Up
Arfgap1	3486.82	3294.07	3679.57	1.11701	0.15964	0.0966402	0.315065	Up
Arfgap2	2561.04	2304.03	2818.05	1.22312	0.290568	0.00707962	0.0506126	Up
Arfgap3	893.89	721.565	1066.22	1.47792	0.563565	5.94e-05	0.00104072	Up
Arfgef1	4603.9	4644.77	4563.03	0.982376	-0.0256528	0.839826	0.938515	Down
Arfgef2	2346.57	2440.51	2252.63	0.922977	-0.115633	0.363324	0.657918	Down
Arfgef3	1290.34	1361.29	1219.38	0.895736	-0.158854	0.710166	0.883621	Down
Arfip1	958.204	888.277	1028.13	1.15764	0.211181	0.0973449	0.316371	Up
Arfip2	4003.39	3894.96	4111.82	1.05569	0.0781823	0.41582	0.701714	Up
Arfrp1	967.898	1004.78	931.011	0.926551	-0.110058	0.365114	0.659305	Down
Arg1	5.6552	4.96917	6.34124	1.27701	0.35277	0.708574	0.883068	Up
Arg2	91.8436	101.149	82.5384	0.816629	-0.292248	0.458593	0.73398	Down
Arglu1	1871	1862.48	1879.53	1.00911	0.0130829	0.910789	0.965561	Up
Arhgap1	2800.08	2613.56	2986.61	1.14269	0.192439	0.0513822	0.211206	Up
Arhgap10	262.868	286.062	239.674	0.837476	-0.25588	0.235148	0.526333	Down
Arhgap11a	95.4262	97.3952	93.4572	0.960019	-0.0588651	0.832158	0.935309	Down
Arhgap12	2765.56	3115.25	2415.88	0.775472	-0.366853	0.00172895	0.0168682	Down
Arhgap15	742.961	797.804	688.118	0.862479	-0.213439	0.182642	0.458371	Down
Arhgap17	379.435	343.772	415.098	1.20722	0.27169	0.0883995	0.298814	Up
Arhgap18	249.917	239.273	260.561	1.08902	0.123029	0.494521	0.75898	Up
Arhgap19	101.917	82.7323	121.102	1.46366	0.549578	0.0592698	0.232063	Up
Arhgap20	2519.79	3014.41	2025.17	0.671806	-0.573883	0.000241676	0.00342354	Down
Arhgap21	5488.35	6048.22	4928.48	0.81483	-0.295429	0.0242888	0.124979	Down
Arhgap22	201.014	180.15	221.878	1.23189	0.300874	0.207912	0.493836	Up
Arhgap23	3880.4	3925.83	3834.97	0.976843	-0.0338009	0.760931	0.906439	Down
Arhgap24	189.998	203.597	176.399	0.866229	-0.20718	0.283489	0.580483	Down
Arhgap25	145.789	96.002	195.576	2.03677	1.02629	1.7e-05	0.000353995	Up
Arhgap26	2761.27	3164.01	2358.53	0.74539	-0.423933	0.000246726	0.00347529	Down
Arhgap27	419.538	499.631	339.445	0.679419	-0.557627	0.000896659	0.0100438	Down
Arhgap28	14.8014	15.157	14.4458	0.951419	-0.071848	0.921053	0.969475	Down
Arhgap29	548.472	525.018	571.926	1.08919	0.12325	0.564756	0.801106	Up
Arhgap30	99.8316	89.1266	110.537	1.24038	0.310779	0.30235	0.599371	Up
Arhgap31	973.873	908.004	1039.74	1.14507	0.19543	0.187181	0.465217	Up
Arhgap32	4923.87	5499.78	4347.97	0.790569	-0.339037	0.0263527	0.132919	Down
Arhgap33	3821.83	4152.37	3491.29	0.840765	-0.250226	0.00816803	0.056254	Down
Arhgap35	7612.73	7813.49	7411.97	0.948606	-0.0761185	0.535717	0.784517	Down
Arhgap36	98.7142	56.74	140.689	2.47896	1.30973	0.137736	0.388897	Up
Arhgap39	4117.31	4001.82	4232.81	1.05773	0.0809761	0.437216	0.71864	Up
Arhgap4	55.2903	47.537	63.0436	1.32594	0.407018	0.223161	0.512448	Up
Arhgap40	6.29144	7.21977	5.36312	0.741042	-0.432373	0.670041	0.862621	Down
Arhgap42	300.607	271.64	329.575	1.2135	0.27918	0.114529	0.348062	Up
Arhgap44	4760.82	4823.79	4697.85	0.973905	-0.0381471	0.689295	0.872545	Down
Arhgap45	186.941	166.462	207.419	1.24631	0.317668	0.153863	0.415401	Up
Arhgap5	6330.46	6877.92	5783	0.84079	-0.250183	0.027074	0.135333	Down
Arhgap6	182.345	176.38	188.309	1.06722	0.0938533	0.696743	0.87608	Up
Arhgap8	2.97058	2.6368	3.30436	1.25483	0.327489	0.825442	0.932499	Up
Arhgap9	22.6431	22.0788	23.2075	1.05181	0.0728726	0.898984	0.962731	Up
Arhgdia	11227.3	11132.7	11321.8	1.01701	0.0243335	0.80308	0.923006	Up
Arhgdib	454.047	324.693	583.401	1.79654	0.84522	1.43e-09	7.71e-08	Up
Arhgdig	2124.28	2098.39	2150.17	1.02472	0.0352344	0.800329	0.921471	Up
Arhgef1	670.267	677.324	663.21	0.979293	-0.0301872	0.818964	0.928626	Down
Arhgef10	1221.24	1291.27	1151.21	0.891486	-0.165717	0.212948	0.50033	Down
Arhgef10l	1104.85	1188.2	1021.49	0.859869	-0.217812	0.143661	0.398031	Down
Arhgef11	3213.51	3381.44	3045.58	0.90068	-0.150914	0.187454	0.465606	Down
Arhgef12	7724.09	7477.96	7970.22	1.06581	0.0919528	0.490513	0.756621	Up
Arhgef15	321.844	270.919	372.77	1.37618	0.460673	0.00873209	0.0592229	Up
Arhgef16	18.002	6.28835	29.7157	4.72777	2.24116	0.00136499	0.0140268	Up
Arhgef17	8786.77	8742.19	8831.35	1.01019	0.0146308	0.893837	0.961001	Up
Arhgef18	1675.03	1541.06	1808.99	1.17389	0.231297	0.0460473	0.196417	Up
Arhgef19	615.443	577.065	653.821	1.13312	0.180303	0.270224	0.56549	Up
Arhgef2	4230.21	4341.98	4118.44	0.948525	-0.0762425	0.557483	0.797036	Down
Arhgef25	8746.95	9531.55	7962.35	0.835349	-0.259548	0.031457	0.150744	Down
Arhgef26	2833.63	2399.74	3267.52	1.36167	0.445382	3.35e-05	0.000643612	Up
Arhgef28	3071.9	2852.21	3291.59	1.15403	0.206679	0.190636	0.469187	Up
Arhgef3	3936.99	3952.37	3921.6	0.992219	-0.01127	0.919005	0.968903	Down
Arhgef33	31.248	32.3831	30.1129	0.92932	-0.105753	0.812985	0.926523	Down
Arhgef37	42.4244	41.6318	43.217	1.0389	0.0550575	0.886142	0.958616	Up
Arhgef39	11.0057	7.58729	14.424	1.89849	0.924854	0.245705	0.53905	Up
Arhgef4	10322.9	11265.1	9380.72	0.832717	-0.264101	0.0088147	0.0596326	Down
Arhgef40	716.363	643.399	789.327	1.22713	0.295287	0.0429102	0.186676	Up
Arhgef5	66.2633	59.0807	73.4459	1.24373	0.314673	0.339946	0.636975	Up
Arhgef6	802.803	850.021	755.584	0.888771	-0.170116	0.325736	0.623138	Down
Arhgef7	4787.16	4180.16	5394.17	1.29042	0.367838	0.000105877	0.00170354	Up
Arhgef9	16379.4	16564	16194.9	0.97771	-0.032521	0.761066	0.906439	Down
Arid1a	3345.57	3374.99	3316.15	0.982546	-0.025403	0.851547	0.943657	Down
Arid1b	3085.31	3076.35	3094.26	1.00578	0.0083209	0.942506	0.977933	Up
Arid2	1251.45	1339.1	1163.79	0.869064	-0.202466	0.115549	0.349668	Down
Arid3a	143.116	139.594	146.638	1.05044	0.0709927	0.773404	0.911042	Up
Arid3b	148.205	86.5673	209.843	2.42445	1.27766	1.13e-07	4.2e-06	Up
Arid4a	1154.72	1217.87	1091.57	0.896378	-0.15782	0.210207	0.497001	Down
Arid4b	1694.54	1614.07	1775.01	1.09973	0.137153	0.222504	0.511554	Up
Arid5a	447.173	379.877	514.47	1.35464	0.437914	0.010911	0.0698715	Up
Arid5b	1090.57	1184.95	996.195	0.840703	-0.250332	0.0709522	0.26021	Down
Arih1	4593.05	4323.71	4862.39	1.1246	0.169408	0.0767628	0.272969	Up
Arih2	1779.2	1680.79	1877.6	1.11709	0.159747	0.111811	0.34299	Up
Arl1	7164.95	6548.2	7781.7	1.18837	0.248985	0.0153931	0.0904276	Up
Arl10	1283.5	1378.3	1188.7	0.862343	-0.213666	0.12645	0.369346	Down
Arl11	11.2682	11.9834	10.553	0.883349	-0.178945	0.839284	0.938389	Down
Arl13b	330.076	318.739	341.413	1.0714	0.0994976	0.520561	0.775481	Up
Arl14ep	1653.99	1581.6	1726.39	1.09156	0.126393	0.335405	0.632571	Up
Arl15	2661.8	2849.56	2474.05	0.868236	-0.203841	0.10043	0.322294	Down
Arl16	966.51	952.118	980.902	1.03026	0.0430072	0.709468	0.883417	Up
Arl2	1969.57	1938.68	2000.47	1.03196	0.0453801	0.712775	0.885118	Up
Arl2bp	6553.09	6837.44	6268.75	0.916848	-0.125246	0.194925	0.474858	Down
Arl3	3209.93	3183.38	3236.47	1.01671	0.0239029	0.815121	0.927261	Up
Arl4a	1361.32	1366.26	1356.39	0.99267	-0.0106133	0.931239	0.973193	Down
Arl4c	1831.39	2082.86	1579.92	0.758565	-0.398655	0.0003259	0.00436207	Down
Arl4d	3162.12	515.092	5809.15	11.2781	3.49545	7.18e-21	1.37e-18	Up
Arl5a	3604.89	3594.89	3614.9	1.00554	0.00797086	0.940593	0.977476	Up
Arl5b	1926.8	1071.87	2781.72	2.59514	1.37581	4.05e-12	3.2e-10	Up
Arl5c	44.3155	47.7434	40.8875	0.857345	-0.222053	0.62431	0.838393	Down
Arl6	1182.34	1208.98	1155.69	0.955831	-0.0651726	0.587527	0.815667	Down
Arl6ip1	12600.5	14029.6	11171.4	0.796266	-0.328677	0.0159008	0.0924823	Down
Arl6ip4	1356.31	1404.55	1308.07	0.931318	-0.102655	0.422555	0.706732	Down
Arl6ip5	6155.55	6272.54	6038.56	0.962706	-0.0548323	0.574572	0.807094	Down
Arl6ip6	327.573	315.396	339.75	1.07744	0.107606	0.502582	0.764462	Up
Arl8a	7652.42	7937.42	7367.42	0.928213	-0.107472	0.2823	0.578643	Down
Arl8b	9946.96	9980.37	9913.56	0.993301	-0.00969647	0.913402	0.966715	Down
Arl9	2.62696	1.64581	3.60811	2.19574	1.13471	0.485965	0.753529	Up
Armc1	4462.84	4278.48	4647.2	1.08619	0.119272	0.189937	0.468801	Up
Armc10	962.207	755.756	1168.66	1.5463	0.628817	8.94e-05	0.00147208	Up
Armc2	121.522	125.695	117.349	0.93396	-0.0985676	0.684175	0.869493	Down
Armc3	25.1603	27.9632	22.3573	0.79886	-0.323986	0.535684	0.784517	Down
Armc4	23.7891	28.0553	19.5229	0.694231	-0.526512	0.318308	0.616692	Down
Armc5	511.112	493.252	528.972	1.07257	0.101069	0.447385	0.726118	Up
Armc6	1283.12	1171.32	1394.92	1.19099	0.25216	0.0284093	0.140201	Up
Armc7	339.159	361.751	316.566	0.875053	-0.192558	0.307455	0.605271	Down
Armc8	2864.51	2846.64	2882.38	1.01253	0.0179579	0.851208	0.943558	Up
Armc9	987.302	854.979	1119.63	1.30933	0.38883	0.00163123	0.0161284	Up
Armcx1	2460.77	2567.81	2353.73	0.916596	-0.125642	0.225741	0.515296	Down
Armcx2	3834.84	3787.38	3882.3	1.02504	0.0356851	0.794074	0.919078	Up
Armcx3	2330.49	2256.25	2404.73	1.06575	0.091874	0.380654	0.673349	Up
Armcx4	2661.33	2363.9	2958.76	1.2516	0.323768	0.0417211	0.183051	Up
Armcx5	899.79	920.535	879.044	0.954868	-0.0666262	0.597054	0.821739	Down
Armcx6	128.132	154.772	101.492	0.655591	-0.609132	0.0234519	0.121976	Down
Armh1	11.7422	13.1879	10.2964	0.781325	-0.356005	0.613093	0.83158	Down
Armh3	787.755	764.993	810.517	1.05937	0.0832082	0.522758	0.776696	Up
Armh4	1383.01	1458.49	1307.53	0.896441	-0.157719	0.219501	0.508346	Down
Armt1	711.927	770.156	653.699	0.84876	-0.236571	0.062057	0.239318	Down
Arnt	615.501	595.538	635.464	1.06703	0.0935958	0.461521	0.735773	Up
Arnt2	10166.6	10095.4	10237.9	1.01411	0.0202188	0.846268	0.941647	Up
Arntl	1117.67	1043.7	1191.64	1.14172	0.191208	0.161148	0.427481	Up
Arntl2	136.597	141.95	131.243	0.924217	-0.113696	0.638102	0.845943	Down
Arpc1a	8089.3	8187.6	7991	0.975991	-0.03506	0.770506	0.909927	Down
Arpc1b	959.586	850.496	1068.68	1.25678	0.329728	0.0685087	0.253916	Up
Arpc2	13855.8	11755.2	15956.3	1.35738	0.440827	0.00101964	0.0111078	Up
Arpc3	7206.83	6683.54	7730.12	1.1566	0.209889	0.0683611	0.253525	Up
Arpc4	5388.62	5229.95	5547.29	1.06069	0.0850012	0.416514	0.702358	Up
Arpc5	10472.8	9412.47	11533.1	1.2253	0.293135	0.00405658	0.0331301	Up
Arpc5l	3641.69	3483.62	3799.77	1.09075	0.125324	0.222073	0.51115	Up
Arpin	571.673	585.394	557.952	0.953349	-0.0689236	0.637173	0.845331	Down
Arpp19	4730.14	4116.32	5343.97	1.29826	0.376583	0.000287573	0.00393914	Up
Arpp21	7559.8	6307.95	8811.65	1.39692	0.482253	0.000113483	0.00180403	Up
Arr3	9.79697	3.95676	15.6372	3.94993	1.98183	0.0173777	0.0990177	Up
Arrb1	8957.37	7842.28	10072.5	1.28437	0.361058	0.000698202	0.00825196	Up
Arrb2	1615.66	1578.01	1653.32	1.04774	0.0672832	0.570575	0.804431	Up
Arrdc1	114.451	132.857	96.0451	0.723062	-0.467808	0.0420999	0.183998	Down
Arrdc2	469.998	362.794	577.203	1.59104	0.669968	0.00402053	0.0329032	Up
Arrdc3	1875.46	2049.03	1701.88	0.830617	-0.267745	0.0414208	0.182147	Down
Arrdc4	474.822	379.689	569.956	1.501	0.585922	0.000214497	0.00309119	Up
Arsa	1089.26	1059.9	1118.63	1.05544	0.0778482	0.497244	0.761085	Up
Arsb	4799.59	5550.82	4048.36	0.7293	-0.455416	9.55e-05	0.00155822	Down
Arsg	596.3	714.539	478.061	0.669013	-0.579894	4.02e-05	0.000754279	Down
Arsi	47.2406	40.0709	54.4104	1.3583	0.441804	0.301265	0.598113	Up
Arsj	255.788	117.281	394.295	3.36073	1.74878	1.62e-20	3.01e-18	Up
Arsk	265.566	282.878	248.253	0.877612	-0.188345	0.25944	0.554286	Down
Art1	4.54292	3.34322	5.74262	1.71931	0.781826	0.51514	0.771876	Up
Art3	87.6428	75.5889	99.6966	1.31986	0.400389	0.200789	0.482824	Up
Artn	10.3318	9.96852	10.695	1.07398	0.102969	0.888378	0.95932	Up
Arv1	298.012	282.812	313.212	1.10752	0.14733	0.368894	0.663303	Up
Arvcf	983.385	1034.55	932.216	0.901007	-0.150389	0.176722	0.450563	Down
Arx	649.032	757.255	540.808	0.714183	-0.485635	0.00054486	0.00672726	Down
Arxes1	992.678	854.762	1130.59	1.32271	0.403493	0.00395156	0.032526	Up
Arxes2	1825.51	1899.57	1751.45	0.922027	-0.117118	0.270601	0.565732	Down
As3mt	393.353	360.995	425.71	1.17936	0.238008	0.199272	0.480915	Up
Asah1	1806.44	1658.46	1954.43	1.17854	0.237003	0.0893043	0.300494	Up
Asah2	258.837	320.629	197.044	0.614606	-0.702265	0.000154841	0.00234179	Down
Asap1	2992.42	3171.65	2813.19	0.887008	-0.17298	0.192924	0.472006	Down
Asap2	1730.36	1690.71	1770.01	1.04697	0.0662161	0.584877	0.813654	Up
Asap3	105.757	88.7038	122.811	1.38533	0.470225	0.118409	0.355048	Up
Asb1	1789.89	1943.16	1636.63	0.842209	-0.247749	0.102169	0.32551	Down
Asb10	6.46971	9.26444	3.67498	0.396623	-1.33416	0.179203	0.453776	Down
Asb11	66.4258	54.1454	78.7062	1.45343	0.539466	0.117019	0.352457	Up
Asb13	1585.16	1771.34	1398.98	0.78982	-0.340403	0.00162411	0.0160819	Down
Asb14	4.00065	2.98524	5.01606	1.68152	0.749769	0.512777	0.770598	Up
Asb16	71.9962	94.1294	49.8631	0.529389	-0.9176	0.0111762	0.0711581	Down
Asb18	17.3718	20.7378	14.0058	0.675088	-0.566853	0.400546	0.689268	Down
Asb2	105.682	86.5302	124.833	1.44289	0.52896	0.0975207	0.316787	Up
Asb3	642.24	638.444	646.036	1.01175	0.0168467	0.89335	0.960788	Up
Asb4	30.8443	8.87668	52.8119	5.94098	2.5707	3.73e-05	0.000705382	Up
Asb5	21.7722	17.9738	25.5706	1.42583	0.511804	0.395125	0.68557	Up
Asb6	1094.16	1077.37	1110.96	1.03118	0.0442929	0.700402	0.878338	Up
Asb7	710.815	672.984	748.646	1.11248	0.15378	0.215347	0.503502	Up
Asb8	1544.6	1701.8	1387.39	0.815274	-0.294643	0.00472852	0.0372573	Down
Ascc1	720.099	756.053	684.146	0.90497	-0.144058	0.247562	0.541528	Down
Ascc2	643.487	626.367	660.607	1.05464	0.0767568	0.539811	0.787035	Up
Ascc3	954.905	858.426	1051.38	1.22475	0.292488	0.0129042	0.0794162	Up
Ascl1	215.688	269.941	161.436	0.598101	-0.741538	4.71e-05	0.000856866	Down
Ascl2	3.00015	3.28247	2.71783	0.823042	-0.280963	0.842188	0.939688	Down
Ascl3	2.01762	1.3295	2.70574	2.03363	1.02405	0.549192	0.792117	Up
Ascl4	3.17718	4.6624	1.69197	0.361567	-1.46766	0.304467	0.601829	Down
Ascl5	2.98894	2.65822	3.31966	1.25202	0.324252	0.818401	0.92847	Up
Asf1a	443.793	443.723	443.863	1.00049	0.000708155	0.99697	0.999218	Up
Asf1b	19.2419	20.4585	18.0252	0.880711	-0.183259	0.738825	0.896296	Down
Asgr1	35.112	37.3951	32.8289	0.877555	-0.188439	0.719957	0.887099	Down
Ash1l	4448.96	4563.61	4334.31	0.949734	-0.0744051	0.612368	0.831319	Down
Ash2l	1738.87	1661.53	1816.21	1.09305	0.128365	0.23238	0.52296	Up
Asic1	1198.57	1070.77	1326.37	1.23852	0.308613	0.0235908	0.12256	Up
Asic2	2214.3	2242.51	2186.08	0.974822	-0.0367885	0.706495	0.881978	Down
Asic3	2.00844	1.66645	2.35042	1.41204	0.497781	0.754611	0.903613	Up
Asic4	292.386	384.267	200.505	0.521562	-0.93909	6.16e-08	2.4e-06	Down
Asl	559.86	590.041	529.679	0.897629	-0.155808	0.34925	0.645835	Down
Asns	4995.5	4001.35	5989.64	1.49694	0.582021	0.000169904	0.00253684	Up
Asnsd1	661.283	627.923	694.643	1.10617	0.145576	0.267148	0.562294	Up
Aspa	503.732	693.777	313.687	0.452028	-1.14552	4.4e-13	4.04e-11	Down
Aspdh	29.4157	30.8644	27.9669	0.907384	-0.140216	0.765593	0.907559	Down
Aspg	100.059	41.6738	158.444	3.80401	1.92752	1.02e-10	6.55e-09	Up
Asph	5627.17	5714.58	5539.76	0.969376	-0.0448715	0.661447	0.857725	Down
Asphd1	799.706	883.872	715.539	0.809481	-0.304931	0.0243335	0.125145	Down
Asphd2	4091.2	4159	4023.4	0.967372	-0.0478577	0.634046	0.843865	Down
Aspm	20.7542	14.9163	26.592	1.78548	0.836315	0.134548	0.383596	Up
Aspn	45.5297	47.6221	43.4373	0.912013	-0.132874	0.728917	0.891399	Down
Asprv1	18.115	22.8929	13.3371	0.583209	-0.777914	0.170863	0.442002	Down
Aspscr1	1175.47	1135.22	1215.72	1.07098	0.0989294	0.387444	0.679234	Up
Asrgl1	5797.66	6387.08	5208.23	0.815439	-0.294351	0.0499443	0.207268	Down
Ass1	877.087	923.679	830.496	0.899245	-0.153214	0.267833	0.562782	Down
Aste1	170.36	145.458	195.262	1.34251	0.424928	0.0852084	0.291894	Up
Astn1	9352.44	10333.4	8371.51	0.810134	-0.303767	0.0335753	0.157575	Down
Astn2	949.399	996.193	902.605	0.906039	-0.142355	0.31177	0.609678	Down
Asxl1	1416.81	1510.52	1323.1	0.875911	-0.191144	0.208519	0.494891	Down
Asxl2	847.832	836.355	859.31	1.0274	0.0390046	0.79212	0.918043	Up
Asxl3	262.187	261.711	262.663	1.00379	0.00545263	0.977679	0.993908	Up
Atad1	5510.07	5476.95	5543.2	1.01209	0.0173422	0.845553	0.941239	Up
Atad2	165.456	167.933	162.979	0.969983	-0.0439691	0.867119	0.950612	Down
Atad2b	542.118	536.457	547.779	1.02097	0.0299386	0.85383	0.944655	Up
Atad3a	1153.84	1049.71	1257.97	1.19846	0.261183	0.0578157	0.228179	Up
Atad3aos	19.731	20.7886	18.6734	0.89811	-0.155036	0.773224	0.911042	Down
Atad5	101.66	111.578	91.7429	0.821834	-0.28308	0.361211	0.656487	Down
Atat1	1734.31	1878.02	1590.61	0.847033	-0.239509	0.0294962	0.14449	Down
Atcay	7932.17	8287.92	7576.42	0.914156	-0.129488	0.195631	0.47617	Down
Atcayos	12.7653	15.845	9.68569	0.611002	-0.710751	0.300423	0.597395	Down
Ate1	3426.9	3390.59	3463.22	1.02143	0.0305839	0.789704	0.917594	Up
Atf1	323.911	326.341	321.481	0.984961	-0.0218621	0.894697	0.96151	Down
Atf2	4356.25	4467.19	4245.31	0.950318	-0.0735184	0.463896	0.737583	Down
Atf3	1046.66	34.9816	2058.34	58.7905	5.87751	5.5e-151	3.65e-147	Up
Atf4	5663.33	4030.29	7296.37	1.81043	0.85633	5.17e-15	5.98e-13	Up
Atf5	1254.07	884.806	1623.33	1.83472	0.875557	0.031586	0.151265	Up
Atf6	3324.84	2924.36	3725.32	1.2739	0.349255	0.00173562	0.0168919	Up
Atf6b	2642.46	2914.65	2370.28	0.81323	-0.298265	0.00457936	0.0364135	Down
Atf7	869.252	896.248	842.256	0.939865	-0.0894753	0.522276	0.776548	Down
Atf7ip	2252.53	2420.38	2084.67	0.861265	-0.21547	0.0632167	0.241776	Down
Atg10	405.167	411.32	399.013	0.970372	-0.0433898	0.796681	0.920412	Down
Atg101	1648.69	1525.09	1772.29	1.16208	0.216714	0.0784831	0.276714	Up
Atg12	2734.53	2557.87	2911.19	1.13816	0.186705	0.0769064	0.273334	Up
Atg13	2689.21	3070.99	2307.43	0.751312	-0.412517	0.000131616	0.00205294	Down
Atg14	767.637	780.412	754.863	0.967237	-0.0480586	0.702985	0.880025	Down
Atg16l1	1641.43	1645.34	1637.52	0.995329	-0.00675403	0.950685	0.980641	Down
Atg16l2	274.432	303.387	245.478	0.809209	-0.305416	0.0908534	0.303942	Down
Atg2a	1227.74	1266.13	1189.34	0.93932	-0.0903109	0.439821	0.720615	Down
Atg2b	1877.2	1829.11	1925.29	1.05253	0.0738654	0.61534	0.832492	Up
Atg3	1930.34	1841.94	2018.74	1.09607	0.132342	0.255175	0.549707	Up
Atg4a	161.747	153.761	169.733	1.10337	0.141917	0.540164	0.787035	Up
Atg4b	2396.04	2408.92	2383.17	0.989309	-0.0155064	0.883998	0.957664	Down
Atg4c	1366.42	1358.45	1374.38	1.01169	0.0167651	0.897979	0.96266	Up
Atg4d	852.97	853.406	852.535	0.999093	-0.0013091	0.991403	0.99782	Down
Atg5	1080.14	1030.52	1129.75	1.09644	0.132833	0.262575	0.557563	Up
Atg7	890.635	955.703	825.568	0.863912	-0.211043	0.0906788	0.303631	Down
Atg9a	4244.11	4607.16	3881.07	0.842383	-0.247452	0.0394559	0.176146	Down
Atg9b	129.879	139.198	120.56	0.865388	-0.208581	0.436893	0.718549	Down
Atic	1235.28	1205.52	1265.05	1.0495	0.0697014	0.633168	0.843514	Up
Atl1	5266.48	5530.91	5002.05	0.904357	-0.145035	0.144384	0.399067	Down
Atl2	2439.53	2352.21	2526.84	1.07423	0.103306	0.353437	0.649713	Up
Atl3	1188.21	1240.63	1135.8	0.915456	-0.127437	0.362751	0.65741	Down
Atm	821.24	805.247	837.234	1.03966	0.0561116	0.726575	0.890402	Up
Atmin	2333.49	2376.08	2290.9	0.964171	-0.0526389	0.692209	0.873867	Down
Atn1	5281.08	5473.52	5088.63	0.929689	-0.10518	0.351979	0.648147	Down
Atoh7	20.2108	26.7541	13.6676	0.510991	-0.968631	0.0835542	0.288069	Down
Atoh8	84.5375	81.364	87.7111	1.07819	0.108607	0.77192	0.910484	Up
Atox1	1505.7	1516.03	1495.38	0.986431	-0.0197104	0.902861	0.964295	Down
Atp10a	236.133	268.034	204.231	0.761702	-0.392702	0.133511	0.381736	Down
Atp10b	58.4283	79.8873	36.9694	0.462976	-1.11099	0.000897254	0.0100439	Down
Atp11a	1563.7	1636.8	1490.6	0.910666	-0.135006	0.318262	0.616664	Down
Atp11b	1556.08	1561.71	1550.45	0.992711	-0.0105539	0.932891	0.973633	Down
Atp11c	518.468	451.8	585.136	1.29504	0.372996	0.00692208	0.0498138	Up
Atp12a	3.18857	2.31056	4.06657	1.75374	0.810436	0.545159	0.789686	Up
Atp13a1	1267.38	1226.21	1308.55	1.06711	0.093707	0.42404	0.708085	Up
Atp13a2	5444.81	5520.78	5368.84	0.972465	-0.0402817	0.734121	0.893759	Down
Atp13a3	2873.52	2947.42	2799.63	0.949841	-0.0742428	0.570382	0.804429	Down
Atp13a4	456.881	452.833	460.928	1.01779	0.0254381	0.872239	0.952965	Up
Atp13a5	274.984	314.991	234.976	0.745649	-0.423431	0.0144143	0.0863862	Down
Atp1a1	25216.3	22280.2	28152.3	1.26355	0.337486	0.00157875	0.0157345	Up
Atp1a2	34836.7	31815.8	37857.7	1.18991	0.250848	0.0640546	0.243943	Up
Atp1a3	105581	102484	108678	1.06044	0.0846604	0.405902	0.694529	Up
Atp1b1	96921.1	93198.4	100644	1.07989	0.110881	0.256568	0.551151	Up
Atp1b2	17268.3	15432.6	19103.9	1.2379	0.307896	0.0618963	0.238976	Up
Atp1b3	3801.61	3599.32	4003.9	1.11244	0.153731	0.1826	0.458353	Up
Atp23	207.634	190.916	224.351	1.17504	0.232705	0.266456	0.561134	Up
Atp2a1	26.2007	17.5638	34.8376	1.98547	0.989484	0.142029	0.395206	Up
Atp2a2	28457.3	28737.6	28177	0.980488	-0.0284282	0.811752	0.926135	Down
Atp2a3	144.575	174.814	114.337	0.653827	-0.61302	0.0138009	0.0835147	Down
Atp2b1	30753.6	33370.8	28136.5	0.843146	-0.246146	0.0313759	0.150584	Down
Atp2b2	11637.4	12576.2	10698.6	0.850695	-0.233286	0.0326244	0.154491	Down
Atp2b3	7896.5	8747.86	7045.14	0.805338	-0.312334	0.0244598	0.125632	Down
Atp2b4	3529.78	3789.11	3270.45	0.863114	-0.212377	0.610297	0.829945	Down
Atp2c1	6962.94	6475.06	7450.83	1.15068	0.202484	0.033465	0.157348	Up
Atp2c2	70.0527	40.297	99.8083	2.47726	1.30875	0.000849328	0.0096485	Up
Atp4a	17.527	14.5492	20.5048	1.40741	0.493042	0.397839	0.687641	Up
Atp5a1	40651.4	39894.3	41408.5	1.03795	0.0537427	0.549224	0.792117	Up
Atp5b	53453.4	51037.7	55869.2	1.09466	0.130488	0.15969	0.425022	Up
Atp5c1	11057.7	10752.1	11363.3	1.05684	0.0797575	0.472583	0.744353	Up
Atp5d	10225.9	9611.27	10840.6	1.12791	0.173656	0.163414	0.431373	Up
Atp5e	4390.06	4306.5	4473.62	1.03884	0.0549692	0.669688	0.862371	Up
Atp5g1	4822.48	4632.74	5012.22	1.08195	0.113636	0.354624	0.650634	Up
Atp5g2	2622.78	2574.91	2670.65	1.03724	0.0527444	0.651428	0.85193	Up
Atp5g3	12301.2	12241.3	12361.2	1.00979	0.0140594	0.897174	0.962456	Up
Atp5h	7197.04	7154.82	7239.25	1.01181	0.0169327	0.888783	0.95932	Up
Atp5j	7382.75	7422.63	7342.87	0.989266	-0.01557	0.900118	0.963018	Down
Atp5j2	7058.79	6911.78	7205.79	1.04255	0.0601159	0.637027	0.845302	Up
Atp5k	3605.33	3513.21	3697.45	1.05244	0.0737397	0.529007	0.780107	Up
Atp5l	6159.71	5964.2	6355.22	1.06556	0.0916096	0.451578	0.72923	Up
Atp5md	7609.17	7278.89	7939.44	1.09074	0.125313	0.256047	0.550631	Up
Atp5mpl	4193.22	4006.35	4380.08	1.09329	0.12867	0.311431	0.6093	Up
Atp5o	8633.58	8447.06	8820.1	1.04418	0.0623679	0.615246	0.832492	Up
Atp5pb	13534.7	12846.3	14223.2	1.10719	0.146905	0.16211	0.429135	Up
Atp6ap1	13197.4	13684.4	12710.4	0.928824	-0.106522	0.279898	0.57629	Down
Atp6ap1l	29.4985	30.8358	28.1611	0.912986	-0.131335	0.792094	0.918043	Down
Atp6ap2	11793.7	10970.7	12616.7	1.15003	0.201668	0.0276774	0.137482	Up
Atp6v0a1	18525.5	17979.6	19071.5	1.06072	0.0850491	0.460975	0.735755	Up
Atp6v0a2	2729.99	2379.58	3080.41	1.29454	0.372442	0.000457341	0.00577934	Up
Atp6v0a4	8.97359	7.22094	10.7262	1.48216	0.567704	0.537543	0.785861	Up
Atp6v0b	9302.6	8662.54	9942.66	1.14778	0.198851	0.0495082	0.206315	Up
Atp6v0c	17872.1	17080.8	18663.4	1.09265	0.127838	0.174522	0.446983	Up
Atp6v0d1	12002.5	11533.7	12471.3	1.0813	0.112769	0.261314	0.556487	Up
Atp6v0e	814.298	717.429	911.168	1.27029	0.345158	0.0610771	0.23668	Up
Atp6v0e2	16986.7	17995.8	15977.6	0.887849	-0.171614	0.071539	0.261486	Down
Atp6v1a	33676.3	31919.1	35433.5	1.11009	0.150682	0.199659	0.481268	Up
Atp6v1b1	10.9268	5.99151	15.8621	2.65585	1.40917	0.11004	0.340078	Up
Atp6v1b2	35472.3	32013.6	38931	1.21607	0.282231	0.00149943	0.0151258	Up
Atp6v1c1	11775	11636.2	11913.8	1.02385	0.0339984	0.721387	0.887761	Up
Atp6v1c2	11.7414	22.1341	1.34874	0.0604847	-4.04729	3.38e-05	0.000648831	Down
Atp6v1d	10481.8	10456.9	10506.7	1.00476	0.00684804	0.941299	0.9777	Up
Atp6v1e1	15780.9	15443.6	16118.1	1.04367	0.0616661	0.566171	0.80198	Up
Atp6v1e2	2.33143	1.3184	3.34445	2.53316	1.34094	0.401604	0.690371	Up
Atp6v1f	4666.37	4715.18	4617.56	0.979314	-0.030157	0.785946	0.916117	Down
Atp6v1g1	4293.78	4137.41	4450.15	1.07564	0.105201	0.356086	0.651994	Up
Atp6v1g2	21090.5	22648.4	19532.6	0.862425	-0.21353	0.0451517	0.193717	Down
Atp6v1h	8243.24	7832.18	8654.3	1.10496	0.143999	0.126468	0.369346	Up
Atp7a	347.019	287.879	406.16	1.41114	0.496858	0.0240683	0.124183	Up
Atp7b	41.6746	43.5398	39.8093	0.913471	-0.130569	0.743073	0.898009	Down
Atp8a1	8277.54	7778.21	8776.88	1.12837	0.174235	0.182306	0.457905	Up
Atp8a2	399.096	363.223	434.969	1.19728	0.259755	0.340878	0.637728	Up
Atp8b1	36.7414	46.3699	27.1129	0.584457	-0.774832	0.0608852	0.236218	Down
Atp8b2	1817.29	1862.61	1771.97	0.951275	-0.0720651	0.565134	0.801472	Down
Atp8b3	6.79874	4.29449	9.30298	2.16786	1.11627	0.216024	0.504107	Up
Atp8b5	3.65588	5.66371	1.64805	0.292803	-1.772	0.191781	0.470715	Down
Atp9a	14399.3	15306.6	13492	0.881443	-0.182061	0.0548597	0.220893	Down
Atp9b	1828.95	1856.53	1801.38	0.970214	-0.043625	0.713622	0.885313	Down
Atpaf1	557.118	579.303	534.933	0.923342	-0.115064	0.414732	0.70083	Down
Atpaf2	736.856	743.567	730.144	0.982	-0.0262054	0.837861	0.937675	Down
Atpif1	5693.13	5647.43	5738.82	1.01618	0.0231543	0.834139	0.935953	Up
Atpsckmt	300.143	314.952	285.335	0.906115	-0.142234	0.392498	0.683803	Down
Atr	330.568	322.202	338.934	1.05181	0.0728737	0.646749	0.849719	Up
Atraid	1795.74	1823.01	1768.47	0.970107	-0.0437841	0.733109	0.893295	Down
Atrip-trex1	28.5621	30.1183	27.006	0.897179	-0.156532	0.728019	0.89123	Down
Atrn	7594.52	7894.14	7294.91	0.924078	-0.113913	0.393154	0.684148	Down
Atrnl1	3991.61	4015.24	3967.98	0.9882	-0.0171252	0.880746	0.956238	Down
Atrx	6286.85	6442.28	6131.43	0.951727	-0.0713802	0.58176	0.811122	Down
Atxn1	2162.71	2340.66	1984.76	0.84797	-0.237915	0.0686526	0.254354	Down
Atxn10	13560	12831.1	14288.8	1.11361	0.155242	0.0841779	0.289607	Up
Atxn1l	1587.83	1471.65	1704	1.15784	0.211437	0.0874298	0.296897	Up
Atxn2	3112.83	2894.04	3331.62	1.15125	0.203199	0.0457815	0.195647	Up
Atxn2l	3296.23	2949.38	3643.09	1.23522	0.304769	0.00725762	0.0515025	Up
Atxn3	887.278	908.001	866.556	0.954287	-0.0675041	0.602646	0.824799	Down
Atxn7	570.937	558.196	583.679	1.0455	0.0641938	0.643655	0.84832	Up
Atxn7l1	1030.17	1052.56	1007.79	0.957502	-0.0626527	0.614521	0.832462	Down
Atxn7l2	346.772	332.303	361.241	1.0871	0.120487	0.430068	0.713244	Up
Atxn7l3	9050.46	9475.28	8625.63	0.910329	-0.135541	0.186989	0.465071	Down
[truncated: 17,905 more rows]
