# Supplementary material for: Integrating Proteomics and Transcriptomics Reveals the Potential Pathways of Hippocampal Neuron Apoptosis in Dravet Syndrome Model Mice
Source: Int J Mol Sci. 2024 Apr 18;25(8):4457. doi: 10.3390/ijms25084457 (PMC11050081; doi:10.3390/ijms25084457)
Supplement: Supplementary file 1 [file ijms-25-04457-s001.zip › supplementary Table S4.xlsx]

## Sheet: KO-vs-WT-diff-q-val-0.05-FC-2.0
Differentially Expressed Genes (DEGs)
gene_id	BaseMean_DESeq2	BaseMean_control_WT	BaseMean_case_KO	FoldChange	log2FoldChange	p-value	q-value	Regulation
Amy2b	85.3586	170.717	0	0.00107913	-9.85592	0.00333528	0.0284916	Down
Gm35082	14.7546	28.1764	1.33282	0.0473243	-4.40128	0.000600905	0.00727925	Down
Gm41096	5.92373	11.1769	0.670544	0.0597542	-4.06482	0.00331829	0.0283815	Down
Atp6v1c2	11.7414	22.1341	1.34874	0.0604847	-4.04729	3.38058e-05	0.000648831	Down
Tdo2	167.972	316.501	19.4427	0.0612583	-4.02895	1.68764e-48	9.3303e-46	Down
Tmem171	10.9268	20.5284	1.32517	0.0648998	-3.94564	9.11273e-05	0.00149522	Down
1700030C10Rik	7.27798	13.5422	1.01377	0.0743064	-3.75037	0.00401347	0.032859	Down
Slc4a1	9.68512	17.6821	1.68814	0.0948975	-3.39749	0.0043768	0.0351681	Down
Rtl3	82.2862	146.45	18.1226	0.123454	-3.01796	5.65674e-17	7.76456e-15	Down
Tsks	8.93249	15.8298	2.0352	0.127409	-2.97246	0.00255309	0.0231288	Down
Gm35479	49.0542	86.9537	11.1547	0.127561	-2.97074	4.35064e-10	2.54679e-08	Down
Erich5	8.73745	15.1321	2.34277	0.154484	-2.69447	0.00394888	0.0325174	Down
Gm17597	14.5574	24.7649	4.34996	0.175381	-2.51143	0.000239809	0.00339951	Down
Gm29771	13.2237	22.4368	4.01056	0.178586	-2.48531	0.000943653	0.0104516	Down
Nhlh1	22.9616	38.9395	6.98378	0.179615	-2.47702	2.3076e-05	0.000464391	Down
Ptx4	11.8742	20.0485	3.69977	0.183792	-2.44385	0.00389873	0.0322111	Down
Gm15478	13.5333	22.7599	4.30666	0.189796	-2.39748	0.00187645	0.0180857	Down
Myh3	28.9659	48.59	9.34185	0.192297	-2.37859	1.99124e-06	5.54289e-05	Down
3300002A11Rik	11.2222	18.7611	3.68324	0.195899	-2.35182	0.00335366	0.0286226	Down
Gm35624	9.93435	16.5204	3.34828	0.202343	-2.30512	0.00513809	0.0398377	Down
Prss8	13.7088	22.7568	4.66074	0.204983	-2.28642	0.00197938	0.0188767	Down
Igbp1b	16.5992	27.4597	5.73879	0.207982	-2.26547	0.000865534	0.00980463	Down
Tcp11	11.221	18.4352	4.00673	0.217155	-2.2032	0.00423626	0.0343464	Down
Gm31288	11.0696	18.1483	3.99082	0.220223	-2.18296	0.00394724	0.0325173	Down
Sec1	17.4901	28.6747	6.30558	0.220347	-2.18215	0.000885145	0.00995313	Down
Ankrd63	473.034	774.876	171.191	0.220874	-2.17871	2.42334e-05	0.000483769	Down
Gm33210	11.9162	19.5061	4.3264	0.222093	-2.17076	0.00450735	0.0359558	Down
Gm32793	13.5609	22.1376	4.98423	0.22561	-2.1481	0.00202777	0.0192276	Down
Gm34418	20.0663	32.67	7.46259	0.22713	-2.13841	0.00199439	0.018975	Down
Gm33852	17.9383	29.2126	6.66411	0.228424	-2.13021	0.00103234	0.0111971	Down
Fam160a1	168.691	273.503	63.8791	0.233362	-2.09936	7.90768e-18	1.14344e-15	Down
Vwa3a	155.895	252.125	59.6655	0.236764	-2.07848	2.32953e-20	4.25364e-18	Down
Gmnc	69.1425	111.604	26.6806	0.239105	-2.06428	1.4091e-09	7.64176e-08	Down
Plk5	214.862	344.931	84.7933	0.245495	-2.02623	1.79709e-11	1.27741e-09	Down
Epop	839.924	1343.85	335.995	0.249973	-2.00016	9.65584e-39	4.08894e-36	Down
Rskr	15.6945	25.0796	6.30941	0.252081	-1.98804	0.00186611	0.0180115	Down
Gkn3	48.0705	76.6588	19.4822	0.253773	-1.97839	3.05802e-05	0.000593793	Down
Il20rb	51.264	81.3488	21.1792	0.259703	-1.94506	1.44214e-06	4.21482e-05	Down
Ngb	91.6999	145.459	37.9403	0.260295	-1.94178	1.58905e-10	9.94557e-09	Down
Ngp	37.2094	59.0351	15.3838	0.260402	-1.94119	0.00668766	0.0484898	Down
Usp43	21.3301	33.6972	8.96296	0.266568	-1.90742	0.000690977	0.00817629	Down
Palm3	62.3184	98.2454	26.3914	0.268443	-1.89731	7.62499e-08	2.91847e-06	Down
Gm32247	21.0919	33.1407	9.04315	0.272603	-1.87513	0.00123556	0.0129161	Down
Cited4	41.2997	64.7818	17.8176	0.274405	-1.86562	5.94012e-05	0.00104072	Down
Nkx3-1	22.1636	34.6135	9.7137	0.280105	-1.83596	0.000835772	0.00950535	Down
Clspn	34.2402	53.4425	15.038	0.281158	-1.83055	4.23845e-05	0.000786187	Down
C630031E19Rik	25.7767	40.219	11.3344	0.281833	-1.82709	0.000573167	0.00699861	Down
Cldn22	49.7423	77.3871	22.0975	0.285207	-1.80992	7.85479e-07	2.43511e-05	Down
Cort	112.344	174.701	49.9879	0.286227	-1.80477	3.00647e-09	1.5343e-07	Down
LOC118568506	119.465	185.666	53.2643	0.286571	-1.80303	4.92406e-12	3.79859e-10	Down
Prtg	47.7594	74.1568	21.362	0.28795	-1.79611	8.14589e-06	0.000187431	Down
LOC118567524	37.1329	57.2428	17.0229	0.297417	-1.74944	0.000363748	0.00478815	Down
Baiap2l2	32.6075	50.2056	15.0093	0.299003	-1.74177	6.90972e-05	0.00118249	Down
Gm12371	25.9408	39.8569	12.0246	0.301441	-1.73005	0.000729476	0.00852361	Down
Clec1a	34.9918	53.702	16.2817	0.303525	-1.72011	0.000205791	0.00298533	Down
Gm11681	59.0652	90.4074	27.723	0.306477	-1.70615	5.60101e-07	1.81263e-05	Down
Wnt9a	208.446	318.847	98.0451	0.307319	-1.70219	1.43875e-10	9.1487e-09	Down
Gm16702	59.8713	91.2861	28.4566	0.311336	-1.68346	1.02682e-05	0.000229113	Down
Upk1b	17.5485	26.7568	8.34016	0.311733	-1.68162	0.00461702	0.0366106	Down
Ntf3	197.442	300.997	93.8876	0.312157	-1.67966	1.00581e-16	1.35262e-14	Down
Ntsr1	114.281	174.069	54.4928	0.313458	-1.67366	9.6255e-10	5.33639e-08	Down
Npbwr1	60.9538	92.7946	29.1131	0.313587	-1.67306	9.30433e-06	0.000209959	Down
Ecm2	173.9	264.08	83.7204	0.31669	-1.65886	1.33874e-12	1.11021e-10	Down
9930012K11Rik	26.9396	40.8452	13.034	0.318773	-1.6494	0.000974112	0.0107352	Down
Ramp3	137.181	207.556	66.8064	0.321771	-1.63589	2.9199e-13	2.73268e-11	Down
Serpinb1a	227.174	343.206	111.141	0.323589	-1.62777	7.26404e-15	8.30897e-13	Down
Bbc3	166.012	249.911	82.1125	0.32861	-1.60555	9.56037e-12	7.1e-10	Down
Frat2	286.173	428.287	144.058	0.336245	-1.57242	4.07218e-19	6.86852e-17	Down
AA465934	39.39	58.8699	19.9102	0.338835	-1.56135	0.000567849	0.00694852	Down
Klhl14	26.8472	40.0109	13.6835	0.34203	-1.54781	0.0016376	0.0161672	Down
Baiap3	193.22	287.89	98.5496	0.342071	-1.54763	6.38546e-07	2.03019e-05	Down
Msc	24.6607	36.6753	12.6462	0.345186	-1.53455	0.00204549	0.0193772	Down
Ranbp3l	192.214	285.58	98.8474	0.345815	-1.53193	6.94656e-06	0.000162465	Down
Gm3693	25.8146	38.296	13.3333	0.348259	-1.52177	0.0024835	0.0226739	Down
Gm30238	28.7995	42.5815	15.0176	0.352611	-1.50385	0.00131178	0.0135487	Down
Gm39605	25.065	37.0368	13.0932	0.352847	-1.50289	0.00462689	0.0366596	Down
Magee2	356.85	525.34	188.36	0.358359	-1.48052	6.39458e-16	8.05514e-14	Down
Bbox1	76.8571	113.064	40.6499	0.35889	-1.47839	1.16954e-05	0.000257208	Down
Otof	78.6901	115.706	41.6745	0.359492	-1.47597	4.63233e-05	0.000843526	Down
Npsr1	37.8114	55.5732	20.0496	0.360667	-1.47126	0.000282909	0.00388863	Down
Gm30041	21.3798	31.41	11.3497	0.361338	-1.46858	0.0044846	0.0358174	Down
Nipal4	85.5933	125.687	45.4992	0.361739	-1.46698	1.2715e-07	4.6951e-06	Down
Abca8a	202.863	297.81	107.916	0.362107	-1.46551	1.71777e-06	4.87714e-05	Down
Mme	194.179	284.922	103.436	0.362703	-1.46314	3.02195e-10	1.8226e-08	Down
Hlf	3992.65	5858.42	2126.88	0.363041	-1.4618	1.48285e-32	5.00223e-30	Down
Gm19412	64.4802	94.6072	34.3533	0.363257	-1.46094	3.0643e-06	8.1102e-05	Down
Ankub1	23.6955	34.7009	12.6901	0.365614	-1.45161	0.00373387	0.0311594	Down
Ifi203	112.343	164.504	60.182	0.366067	-1.44982	4.96667e-05	0.000896208	Down
Gabrd	541.497	792.652	290.342	0.366085	-1.44975	1.42517e-14	1.56714e-12	Down
Pde7b	462.963	677.645	248.282	0.366252	-1.44909	1.43064e-22	3.06171e-20	Down
Hes5	316.781	462.779	170.783	0.36898	-1.43839	4.29082e-15	5.05327e-13	Down
Gm39332	38.3561	56.0022	20.71	0.369591	-1.436	0.00308104	0.0268603	Down
Ido2	44.6089	65.0985	24.1194	0.370018	-1.43433	0.000193746	0.00283786	Down
Fat4	675.699	984.885	366.512	0.372141	-1.42608	9.35366e-15	1.06381e-12	Down
Vwa5b1	53.4737	77.9475	28.9998	0.372167	-1.42598	5.42672e-05	0.00096522	Down
LOC118568695	35.8733	52.2232	19.5235	0.372969	-1.42287	0.00350695	0.0295884	Down
Npy2r	1654.67	2408.05	901.282	0.374196	-1.41814	7.9282e-18	1.14344e-15	Down
Gm40578	229.962	334.352	125.572	0.375403	-1.41349	7.31519e-10	4.14798e-08	Down
5430400D12Rik	29.319	42.5984	16.0396	0.376307	-1.41002	0.00250888	0.0228323	Down
Epor	106.711	154.49	58.9316	0.38081	-1.39286	3.15202e-05	0.000609295	Down
Sebox	216.553	313.346	119.759	0.381777	-1.3892	6.7881e-10	3.87116e-08	Down
A230001M10Rik	37.6464	54.0863	21.2066	0.391392	-1.35331	0.00463657	0.0366925	Down
Abcc8	552.858	794.088	311.629	0.392282	-1.35004	2.80315e-21	5.46971e-19	Down
Gpr12	589.686	846.343	333.03	0.393478	-1.34564	1.25519e-12	1.04967e-10	Down
1700040D17Rik	24.2025	34.7406	13.6644	0.393617	-1.34513	0.0061106	0.0454992	Down
Lefty2	48.5936	69.7025	27.4848	0.393705	-1.34481	0.000230136	0.00327874	Down
Nek10	111.56	159.453	63.6669	0.398837	-1.32613	4.04064e-06	0.00010284	Down
Scnn1a	182.484	260.834	104.134	0.399449	-1.32392	1.56705e-05	0.000331798	Down
Stc1	90.4243	129.074	51.7749	0.400943	-1.31853	1.60127e-06	4.59224e-05	Down
Srp54b	105.087	149.759	60.4155	0.403212	-1.31039	0.00354927	0.0299073	Down
Fxyd7	1547.39	2205.37	889.404	0.40322	-1.31036	1.00206e-13	1.00727e-11	Down
Sytl2	757.725	1079.47	435.98	0.403789	-1.30833	2.2136e-19	3.76557e-17	Down
E130008D07Rik	63.2572	90.0716	36.4427	0.40426	-1.30665	7.25877e-05	0.0012285	Down
Cxcl12	1564.32	2226.94	901.69	0.404875	-1.30445	0.000203125	0.00295311	Down
Dbp	2119.28	3014.97	1223.59	0.405837	-1.30103	1.49708e-12	1.22116e-10	Down
Kcng3	267.068	379.593	154.544	0.40705	-1.29672	3.78153e-09	1.88631e-07	Down
Opalin	1023.7	1454.85	592.539	0.407242	-1.29604	5.06548e-16	6.42154e-14	Down
Itga4	674.944	957.779	392.11	0.40928	-1.28884	2.32476e-13	2.2245e-11	Down
Slc38a4	31.0225	43.9791	18.0659	0.410479	-1.28462	0.00416375	0.0338664	Down
Inhbb	235.29	333.534	137.046	0.410753	-1.28366	5.16258e-08	2.04276e-06	Down
Acot5	124.305	175.871	72.74	0.413111	-1.2754	4.14468e-07	1.3958e-05	Down
Trim59	540.046	763.114	316.979	0.415286	-1.26782	1.50576e-19	2.58355e-17	Down
Sptssb	42.9231	60.471	25.3752	0.419573	-1.25301	0.00309366	0.0269349	Down
D430036J16Rik	51.1546	72.0874	30.2219	0.419898	-1.25189	0.000815286	0.00929893	Down
Tmem212	55.4672	78.0661	32.8683	0.420441	-1.25002	0.000376106	0.0049054	Down
Cst6	87.2651	122.872	51.6578	0.420677	-1.24921	8.26977e-05	0.00137966	Down
Dll1	154.815	217.709	91.9199	0.422341	-1.24352	1.01756e-07	3.79972e-06	Down
Rorc	41.721	58.5501	24.8918	0.42584	-1.23162	0.00447768	0.0357909	Down
Nat8f5	31.7015	44.3023	19.1007	0.430591	-1.21561	0.00673044	0.0487644	Down
4930570G19Rik	182.515	254.933	110.097	0.431575	-1.21232	3.79495e-09	1.88827e-07	Down
Mamstr	47.938	66.945	28.9311	0.432454	-1.20938	0.0033951	0.0289267	Down
Plekhd1	91.2075	127.211	55.2041	0.433725	-1.20515	0.000332152	0.00443679	Down
Frzb	726.226	1012.46	439.997	0.434404	-1.20289	1.29407e-12	1.07765e-10	Down
Osr1	71.6431	99.8076	43.4786	0.435338	-1.19979	9.61532e-05	0.00156735	Down
Galnt13	587.858	818.592	357.123	0.436217	-1.19688	7.05179e-16	8.77198e-14	Down
Tll2	49.5634	68.9279	30.1988	0.437355	-1.19312	0.00271525	0.0242775	Down
Edn3	125.04	173.722	76.3585	0.439234	-1.18694	9.65817e-05	0.00157305	Down
Cys1	380.033	527.95	232.116	0.439558	-1.18587	7.07789e-10	4.02489e-08	Down
Dnali1	49.6761	68.9953	30.3568	0.439964	-1.18454	0.000778426	0.00896586	Down
Fbxo32	371.791	516.309	227.273	0.440292	-1.18347	2.43379e-11	1.70563e-09	Down
Depdc7	63.6531	88.1643	39.142	0.443862	-1.17182	0.00131087	0.0135463	Down
2310015A10Rik	240.464	332.749	148.178	0.445371	-1.16692	4.12764e-11	2.80384e-09	Down
9130024F11Rik	141.757	195.87	87.6445	0.447314	-1.16064	3.66475e-05	0.000695988	Down
Sec14l3	94.8406	130.99	58.6912	0.447708	-1.15937	0.00425586	0.0344607	Down
Bche	217.951	301.035	134.867	0.44776	-1.1592	1.5418e-06	4.44731e-05	Down
Aspa	503.732	693.777	313.687	0.452028	-1.14552	4.40076e-13	4.03633e-11	Down
A630026N12Rik	111.488	153.385	69.5911	0.453393	-1.14117	6.60658e-06	0.000155795	Down
Pirt	83.2525	114.514	51.9909	0.454076	-1.13899	0.00199474	0.018975	Down
Tmem125	228.465	314.108	142.821	0.454416	-1.13792	7.58288e-09	3.4599e-07	Down
Pygl	120.43	165.387	75.4733	0.456171	-1.13235	1.84016e-06	5.19501e-05	Down
C030029H02Rik	54.7858	75.2182	34.3533	0.456667	-1.13079	0.00110631	0.0117937	Down
Smtnl2	50.6185	69.4582	31.7787	0.45726	-1.12891	0.0019001	0.0182341	Down
Pcdh18	101.353	139.104	63.6029	0.457513	-1.12812	2.07216e-05	0.000423431	Down
Gpr52	128.533	176.284	80.7829	0.457791	-1.12724	6.37309e-05	0.00110587	Down
LOC118568202	61.6271	84.5343	38.7198	0.458227	-1.12587	0.00105422	0.0113663	Down
2410018L13Rik	37.0943	50.8863	23.3024	0.458317	-1.12558	0.00452106	0.0360219	Down
Tekt5	198.145	271.558	124.732	0.459233	-1.1227	7.41619e-07	2.3252e-05	Down
Ccdc153	107.495	147.253	67.7368	0.459843	-1.12079	0.000112203	0.00178655	Down
Per3	530.933	726.513	335.353	0.461475	-1.11568	1.4084e-07	5.16233e-06	Down
Igsf1	214.171	293.043	135.299	0.461498	-1.1156	1.23698e-08	5.4589e-07	Down
Cfap52	55.685	76.1742	35.1958	0.462525	-1.1124	0.00285342	0.0251847	Down
Tbata	348.426	476.325	220.526	0.462786	-1.11158	9.24741e-10	5.1555e-08	Down
Atp10b	58.4283	79.8873	36.9694	0.462976	-1.11099	0.000897254	0.0100439	Down
Trmt9b	395.157	540.074	250.24	0.463342	-1.10985	1.41423e-13	1.40037e-11	Down
Adamts2	169.64	231.854	107.426	0.463476	-1.10943	0.00058442	0.00711856	Down
Lrrc23	58.404	79.7776	37.0304	0.464036	-1.10769	0.00123594	0.0129161	Down
Fam117a	153.916	209.983	97.8491	0.466049	-1.10144	1.04668e-06	3.14211e-05	Down
AW011738	60.8665	82.9297	38.8032	0.467533	-1.09686	0.000630437	0.00758162	Down
Sgpp2	204.505	278.697	130.313	0.467737	-1.09623	5.30569e-07	1.72548e-05	Down
Rbm24	470.761	641.246	300.276	0.468491	-1.09391	2.59753e-11	1.81399e-09	Down
Xrcc3	151.719	206.57	96.8669	0.468597	-1.09358	2.2292e-05	0.000450892	Down
Ntn5	178.758	243.273	114.244	0.469256	-1.09155	5.10024e-06	0.000124859	Down
St3gal1	604.456	822.488	386.425	0.469812	-1.08984	5.84042e-09	2.73983e-07	Down
Ccdc160	80.4314	109.366	51.4965	0.47081	-1.08678	0.000592966	0.00720061	Down
Gm266	79.184	107.637	50.7305	0.471461	-1.08479	0.000282342	0.00388352	Down
Syt10	674.81	915.787	433.833	0.47362	-1.0782	4.47857e-10	2.61399e-08	Down
Minar1	58.8628	79.8298	37.8958	0.473953	-1.07718	0.00245425	0.0224894	Down
Myadml2	103.123	139.909	66.336	0.474334	-1.07603	0.000108322	0.00173586	Down
Tnni1	51.7942	70.1896	33.3988	0.475881	-1.07133	0.00163673	0.0161666	Down
Slc8b1	137.209	185.911	88.5066	0.476041	-1.07084	1.06683e-06	3.18816e-05	Down
Gm32810	57.4396	77.7781	37.1011	0.476652	-1.06899	0.00436354	0.0351301	Down
Alox12b	115.687	156.654	74.7213	0.477196	-1.06734	3.05118e-05	0.000593624	Down
Gm2824	302.407	409.102	195.712	0.478026	-1.06484	1.4292e-05	0.000305864	Down
Egfl6	73.7529	99.8166	47.6892	0.47811	-1.06459	0.000777475	0.00896148	Down
Bnip5	143.703	194.373	93.033	0.478282	-1.06407	4.28604e-05	0.000793535	Down
Wnt7a	422.226	570.862	273.591	0.479121	-1.06154	1.4e-11	1.00957e-09	Down
Prkcd	649.944	878.573	421.316	0.479583	-1.06015	1.00151e-12	8.48211e-11	Down
Pik3ip1	1015.36	1371.32	659.396	0.480848	-1.05635	1.59073e-15	1.94234e-13	Down
Tpbgl	160.085	215.972	104.198	0.482317	-1.05195	1.49322e-06	4.34238e-05	Down
Nat8f4	367.322	495.531	239.113	0.482358	-1.05182	8.52427e-07	2.61819e-05	Down
Mndal	87.7911	118.437	57.1449	0.482398	-1.0517	0.000513909	0.00641275	Down
Zc3hav1l	147.328	198.737	95.9183	0.482692	-1.05083	0.000124826	0.0019624	Down
Efhc2	49.4883	66.7196	32.2571	0.483945	-1.04709	0.00412145	0.0335772	Down
Aif1l	256.441	345.204	167.677	0.485924	-1.0412	1.50128e-07	5.44262e-06	Down
Egfem1	269.853	363.109	176.597	0.486294	-1.0401	5.93811e-10	3.42569e-08	Down
Gm9947	62.9455	84.6756	41.2153	0.486339	-1.03996	0.00526151	0.0405803	Down
Slc44a5	1091.12	1467.84	714.386	0.486605	-1.03918	9.13922e-13	7.80678e-11	Down
Fbxo47	100.524	135.104	65.9441	0.487637	-1.03612	7.13855e-05	0.00121124	Down
Gpc3	130.053	174.662	85.4448	0.488678	-1.03304	0.000267472	0.00370975	Down
Neurl1b	1263.75	1692.74	834.751	0.493071	-1.02013	1.6203e-18	2.55944e-16	Down
Prr36	990.019	1325.85	654.19	0.49331	-1.01943	5.17018e-11	3.46472e-09	Down
Gm26777	172.948	231.52	114.377	0.493751	-1.01814	6.19562e-06	0.000147855	Down
Tmem88b	1789.18	2394.03	1184.33	0.494673	-1.01545	1.51604e-18	2.43337e-16	Down
Ltk	235.498	314.952	156.045	0.495376	-1.0134	2.70935e-08	1.13764e-06	Down
Satb2	393.789	526.566	261.011	0.495688	-1.0125	4.62866e-07	1.53038e-05	Down
Cartpt	54.1796	72.4298	35.9294	0.496619	-1.00979	0.00281551	0.0249608	Down
Gask1a	140.108	186.957	93.2583	0.49858	-1.0041	1.58459e-05	0.000334799	Down
Scarf2	63.6185	84.8683	42.3688	0.49922	-1.00225	0.0016914	0.0165789	Down
Slc16a11	163.43	217.886	108.974	0.499624	-1.00109	5.90356e-05	0.00103614	Down
Plekhf1	213.236	141.831	284.64	2.00773	1.00556	0.000267913	0.00371328	Up
Cited2	1884.66	1252.86	2516.46	2.00876	1.00631	1.36365e-13	1.35704e-11	Up
Pstpip1	54.734	36.2863	73.1816	2.01678	1.01206	0.00403247	0.0329738	Up
Tes	75.8785	50.2747	101.482	2.01991	1.01429	0.00105262	0.0113643	Up
Rnf125	103.664	68.6309	138.698	2.02038	1.01463	0.000271381	0.00375612	Up
Tagln2	559.708	370.307	749.11	2.02328	1.0167	9.10832e-08	3.43339e-06	Up
Rimbp2	5607.69	3708.55	7506.83	2.0241	1.01728	2.17026e-17	3.04189e-15	Up
Mapkapk2	2093.08	1382.94	2803.23	2.02719	1.01948	3.5535e-20	6.42958e-18	Up
Kash5	63.081	41.6968	84.4651	2.0274	1.01963	0.00374517	0.0311904	Up
Cxcr4	202.111	133.433	270.79	2.02866	1.02053	4.41318e-05	0.000811039	Up
Gp1bb	309.64	204.431	414.849	2.0302	1.02162	1.37013e-07	5.04061e-06	Up
Ucp2	1540.08	1014.91	2065.25	2.03522	1.02519	3.76997e-09	1.88527e-07	Up
Arhgap25	145.789	96.002	195.576	2.03677	1.02629	1.69856e-05	0.000353995	Up
Lbh	2626.44	1729.16	3523.73	2.03782	1.02703	2.60569e-17	3.62664e-15	Up
Synpo	9366.33	6163.77	12568.9	2.0391	1.02793	3.72398e-18	5.65789e-16	Up
Lat2	59.3258	39.0386	79.613	2.04032	1.0288	0.0060074	0.0449156	Up
Gfpt2	273.919	180.169	367.668	2.04132	1.0295	1.14601e-05	0.000252313	Up
Vegfa	1920.31	1262.59	2578.02	2.04204	1.03001	4.36626e-12	3.40276e-10	Up
Gm29483	95.7675	62.8946	128.64	2.04574	1.03262	0.000790422	0.0090673	Up
Sema4a	1163.58	763.272	1563.89	2.04852	1.03458	2.16824e-15	2.61542e-13	Up
Gdpd5	793.828	520.006	1067.65	2.05261	1.03746	1.02951e-11	7.56098e-10	Up
Ankrd33b	4635.47	3036.51	6234.42	2.05307	1.03778	1.19854e-17	1.7039e-15	Up
Ncf1	418.022	273.745	562.3	2.05436	1.03869	2.18686e-05	0.00044368	Up
Hmgcr	5499.52	3600.68	7398.36	2.05468	1.03892	2.03198e-13	1.99224e-11	Up
Hsph1	20123.5	13172.6	27074.5	2.05537	1.0394	1.73186e-23	3.96198e-21	Up
Galnt14	1187.49	776.61	1598.36	2.05811	1.04132	0.00510277	0.0395871	Up
Dll4	96.4154	62.9946	129.836	2.06068	1.04312	0.000152347	0.00231286	Up
Tet3	2014.74	1315.63	2713.84	2.06255	1.04443	1.03487e-17	1.4818e-15	Up
Anxa2	666.728	435.166	898.289	2.06457	1.04584	2.58034e-07	9.0099e-06	Up
8030453O22Rik	118.648	77.3406	159.956	2.06923	1.04909	5.68639e-05	0.00100333	Up
Spry4	787.809	511.604	1064.01	2.08018	1.05671	8.85246e-12	6.59889e-10	Up
Stac	285.72	185.512	385.929	2.08044	1.05689	1.96405e-06	5.48252e-05	Up
Slc27a3	378.637	245.316	511.959	2.08727	1.06161	1.07954e-05	0.000239534	Up
Cacna2d2	1335.91	865.09	1806.72	2.08848	1.06245	1.77478e-07	6.35314e-06	Up
Creb3l2	291.984	189.026	394.942	2.08872	1.06262	1.35526e-05	0.000291292	Up
Frmd6	1163.45	752.615	1574.29	2.09155	1.06457	2.84076e-13	2.67961e-11	Up
Sfn	66.9161	43.2283	90.6038	2.09564	1.06739	0.000850648	0.00965536	Up
Gm41810	64.8871	41.8948	87.8795	2.09737	1.06858	0.00165045	0.0162538	Up
Itpkc	478.666	308.734	648.597	2.10108	1.07113	2.7138e-14	2.88838e-12	Up
Acvr1	2343.26	1506.61	3179.9	2.11053	1.07761	4.93585e-17	6.8221e-15	Up
Niban2	1613.84	1037.41	2190.28	2.11136	1.07817	4.33044e-12	3.39326e-10	Up
Ptchd1	418.277	268.769	567.786	2.11277	1.07914	5.83977e-09	2.73983e-07	Up
Loxl1	193.844	124.601	263.087	2.1128	1.07916	6.63016e-05	0.0011435	Up
Klhl40	266.168	170.91	361.427	2.11479	1.08052	8.95951e-07	2.7308e-05	Up
Car15	263.338	168.934	357.743	2.11788	1.08262	6.24719e-06	0.000148816	Up
Igfbp7	1086.07	696.579	1475.57	2.11843	1.08299	9.59064e-08	3.59477e-06	Up
Pglyrp1	255.647	163.877	347.418	2.12049	1.0844	6.23508e-05	0.00108666	Up
Slc29a4	1500.55	961.125	2039.97	2.12265	1.08587	6.4541e-08	2.49429e-06	Up
Krt73	392.962	251.674	534.251	2.12344	1.0864	1.57075e-10	9.86902e-09	Up
Pdzd2	2152.9	1378.13	2927.67	2.12434	1.08702	0.00261972	0.0236464	Up
Ccnf	214.719	137.331	292.106	2.12678	1.08867	1.08164e-05	0.000239731	Up
Spsb1	1256.38	801.171	1711.58	2.13626	1.09509	9.29607e-09	4.18597e-07	Up
Gpr153	390.911	248.707	533.115	2.14425	1.10048	3.3348e-08	1.3685e-06	Up
Rbm15	359.922	228.902	490.943	2.14463	1.10073	9.10327e-13	7.80678e-11	Up
Nr4a2	4316.82	2744.7	5888.93	2.14554	1.10134	1.95462e-22	4.09503e-20	Up
Fblim1	53.023	33.7087	72.3373	2.14747	1.10264	0.00666545	0.0484233	Up
Odc1	3894.98	2471.58	5318.37	2.1519	1.10561	2.92449e-13	2.73268e-11	Up
Havcr2	152.176	96.3388	208.014	2.1593	1.11057	0.000598865	0.00726338	Up
S100a10	1474.27	932.906	2015.64	2.16067	1.11148	0.00269344	0.0241258	Up
Zdhhc22	885.432	559.761	1211.1	2.16343	1.11332	3.71069e-08	1.50415e-06	Up
Mylk3	100.908	63.5994	138.216	2.17136	1.1186	0.00236792	0.0218542	Up
Spink10	191.779	120.855	262.703	2.1729	1.11962	4.34029e-07	1.45221e-05	Up
Dok5	797.713	502.645	1092.78	2.17434	1.12058	1.68045e-09	8.94276e-08	Up
Cebpd	1102.78	693.42	1512.15	2.18107	1.12504	4.96245e-10	2.87115e-08	Up
Kcnk1	4743.57	2980.82	6506.31	2.18281	1.12619	1.00687e-11	7.42209e-10	Up
Fcgr3	812.377	508.97	1115.78	2.19242	1.13252	0.00470516	0.0371173	Up
Cotl1	5934.14	3715.44	8152.83	2.19436	1.1338	2.56099e-09	1.31709e-07	Up
Adamtsl3	53.2639	33.3379	73.1899	2.1956	1.13462	0.0039463	0.0325173	Up
Glipr2	177.793	111.248	244.339	2.19768	1.13598	2.44661e-05	0.000487436	Up
Col4a2	1616.22	1007.92	2224.52	2.20695	1.14206	2.29671e-16	3.04743e-14	Up
Aqp1	164.989	102.507	227.472	2.21975	1.1504	0.00159069	0.0188581	Up
Efcab6	451.542	280.112	622.973	2.22447	1.15346	4.30075e-06	0.000108489	Up
Trnp1	11423.8	7072.2	15775.4	2.23065	1.15747	2.0505e-22	4.25116e-20	Up
Gm42226	138.807	85.8875	191.726	2.23298	1.15897	5.61416e-05	0.000993232	Up
Mcl1	5027.19	3103.55	6950.82	2.23974	1.16333	7.62648e-25	1.8511e-22	Up
Nrn1	13880.2	8555.41	19205.1	2.2448	1.16658	9.80158e-20	1.69636e-17	Up
Cd93	389.498	239.509	539.487	2.25209	1.17127	5.50152e-07	1.78624e-05	Up
Homer1	9070.16	5573.47	12566.9	2.25472	1.17295	1.7831e-31	5.72403e-29	Up
Kcnip3	5805.06	3565.45	8044.68	2.2562	1.1739	2.05412e-32	6.81386e-30	Up
Tnfrsf1a	579.632	354.925	804.338	2.26689	1.18071	6.97711e-11	4.55296e-09	Up
B3gnt3	51.8675	31.7156	72.0194	2.27086	1.18324	0.000615323	0.00742679	Up
Kdm6b	1363.51	832.793	1894.24	2.27451	1.18555	9.11901e-20	1.59207e-17	Up
Tlr2	42.2011	25.7475	58.6548	2.27771	1.18759	0.0029866	0.026163	Up
Rhbdf1	410.558	250.332	570.784	2.28087	1.18959	5.06813e-12	3.89463e-10	Up
Krt5	42.4835	25.8881	59.0789	2.28504	1.19222	0.00255056	0.0231165	Up
Trim47	189.505	115.247	263.762	2.2892	1.19484	3.82023e-06	9.79821e-05	Up
Fst	85.2213	51.8193	118.623	2.28942	1.19498	0.0053294	0.0409827	Up
Ctla2b	33.2821	20.2022	46.362	2.29672	1.19958	0.00514774	0.039897	Up
Skil	5177.3	3132.88	7221.72	2.30508	1.20482	7.02228e-25	1.72549e-22	Up
A930024E05Rik	215.776	130.564	300.987	2.3054	1.20502	2.40673e-11	1.69262e-09	Up
Rhoj	201.99	122.153	281.828	2.30758	1.20638	4.95655e-07	1.63058e-05	Up
9030025P20Rik	46.1623	27.8911	64.4335	2.31119	1.20863	0.00557726	0.0423518	Up
Plekha2	2123.69	1282.53	2964.85	2.31151	1.20884	4.37935e-16	5.58733e-14	Up
Rgs13	39.8607	24.06	55.6613	2.31192	1.20909	0.00314319	0.0272815	Up
Zfp703	1453.84	877.62	2030.06	2.31329	1.20994	5.9954e-14	6.11931e-12	Up
Smad7	981.125	592.182	1370.07	2.31364	1.21017	4.76605e-23	1.0424e-20	Up
Ptgfrn	823.111	496.563	1149.66	2.3153	1.2112	6.90123e-13	6.07766e-11	Up
Grp	1929.87	1163.26	2696.49	2.3181	1.21294	1.54901e-11	1.10501e-09	Up
Acp7	82.1821	49.5095	114.855	2.31865	1.21328	1.32416e-05	0.000285533	Up
Serpina3n	9633.36	5801.07	13465.7	2.32125	1.2149	5.43116e-21	1.04948e-18	Up
Mapkapk3	97.7506	58.6422	136.859	2.33459	1.22317	0.00176501	0.0171529	Up
Serpinf1	785.251	470.812	1099.69	2.33589	1.22397	1.06237e-14	1.18788e-12	Up
Mpp7	175.995	105.404	246.586	2.33935	1.22611	1.89829e-07	6.74672e-06	Up
Dmkn	37.4488	22.3702	52.5275	2.34409	1.22903	0.00578471	0.0435615	Up
Pappa2	54.1502	32.2788	76.0217	2.35313	1.23458	0.000767296	0.00887361	Up
Krt2	422.842	252.157	593.526	2.35332	1.2347	2.54574e-14	2.7388e-12	Up
4833422C13Rik	295.459	176.061	414.856	2.3566	1.23671	1.29236e-05	0.00027989	Up
Myh9	4182.13	2486.31	5877.96	2.36405	1.24126	6.03031e-18	8.89046e-16	Up
Plce1	661.013	392.884	929.143	2.36473	1.24168	2.51269e-08	1.0573e-06	Up
Col16a1	331.478	197.069	465.887	2.36486	1.24175	1.87299e-07	6.66871e-06	Up
Igfbp6	776.767	461.618	1091.92	2.36551	1.24215	3.86156e-10	2.26716e-08	Up
Ubtd1	611.489	362.331	860.647	2.37539	1.24816	9.40674e-14	9.50367e-12	Up
Cacna2d4	62.9917	37.3239	88.6595	2.37632	1.24873	0.00196255	0.0187431	Up
Med7	1376.41	814.374	1938.45	2.38048	1.25125	3.3796e-23	7.4738e-21	Up
Col4a1	1960.44	1158.91	2761.98	2.38321	1.25291	5.6456e-13	5.03876e-11	Up
Gm42056	70.0673	41.4043	98.7304	2.385	1.25399	0.000541812	0.00669379	Up
Slc24a4	934.958	552.032	1317.88	2.38689	1.25513	6.04137e-12	4.57192e-10	Up
Col1a1	621.307	366.81	875.804	2.3876	1.25556	0.00396431	0.0325502	Up
Scml4	245.57	144.677	346.464	2.39408	1.25947	6.35856e-11	4.19054e-09	Up
Col6a1	590.23	347.635	832.825	2.39546	1.2603	0.00456185	0.0363148	Up
Sntb2	347.547	203.97	491.124	2.40717	1.26734	5.58467e-09	2.65846e-07	Up
Mir670hg	262.026	153.796	370.257	2.40731	1.26742	5.60742e-05	0.000992922	Up
Bgn	960.176	563.577	1356.77	2.4079	1.26777	3.21998e-10	1.92454e-08	Up
Col18a1	219.666	128.834	310.498	2.41019	1.26915	1.47632e-07	5.38155e-06	Up
Gm40290	40.798	23.9053	57.6907	2.41699	1.27321	0.00207953	0.0196487	Up
Rrad	37.1557	21.7348	52.5766	2.41753	1.27353	0.00554094	0.0421745	Up
Arid3b	148.205	86.5673	209.843	2.42445	1.27766	1.13216e-07	4.204e-06	Up
Dot1l	1453.68	846.289	2061.07	2.43528	1.28409	7.84281e-23	1.69669e-20	Up
Traf3ip2	68.2575	39.7378	96.7772	2.43671	1.28494	0.00606799	0.0452496	Up
Lhfp	1030.94	599.921	1461.95	2.43686	1.28502	3.74037e-30	1.07891e-27	Up
P4ha3	191.965	111.717	272.212	2.43741	1.28535	1.5728e-05	0.000332661	Up
Abca4	89.5844	52.0737	127.095	2.44326	1.28881	0.000178674	0.00264792	Up
Ubap1l	66.0052	38.3203	93.6901	2.44491	1.28978	4.51406e-05	0.000825008	Up
Plekha4	34.9297	20.2935	49.5659	2.44796	1.29158	0.00668358	0.0484779	Up
4933407O12Rik	62.3473	36.1351	88.5594	2.45341	1.29479	0.000512806	0.00640702	Up
Zfp948	575.466	331.884	819.048	2.46823	1.30348	4.1623e-20	7.46326e-18	Up
Ier3	312.267	179.865	444.67	2.47218	1.30578	1.24169e-05	0.000270156	Up
Atp2c2	70.0527	40.297	99.8083	2.47726	1.30875	0.000849328	0.0096485	Up
Nfkbid	66.5732	38.2707	94.8757	2.47729	1.30876	5.56643e-05	0.000987421	Up
Pdlim4	616.725	354.376	879.073	2.4808	1.3108	0.00146121	0.0148379	Up
Ifi30	120.434	69.1312	171.738	2.48581	1.31372	9.03815e-05	0.00148666	Up
Best3	170.595	97.3611	243.829	2.50405	1.32426	1.00637e-08	4.48094e-07	Up
Sap30	530.877	302.971	758.784	2.5053	1.32498	2.6827e-15	3.21649e-13	Up
Gsg1l	1632.3	930.778	2333.82	2.50729	1.32613	4.16166e-18	6.22778e-16	Up
Col5a3	44.0127	25.0212	63.0042	2.51748	1.33198	0.00307824	0.0268593	Up
Tgif1	58.1479	33.0165	83.2792	2.52346	1.3354	0.00058837	0.00714916	Up
A330070K13Rik	61.0854	34.6092	87.5616	2.52717	1.33752	5.63128e-05	0.000995377	Up
Tnfrsf25	103.153	58.4646	147.842	2.52798	1.33798	0.000125312	0.00196849	Up
Cthrc1	295.565	167.55	423.579	2.529	1.33856	3.12506e-06	8.24909e-05	Up
Adamts1	1155.57	653.878	1657.26	2.53455	1.34173	0.00110591	0.0117937	Up
Midn	3310.87	1871.88	4749.86	2.53763	1.34348	2.0508e-37	8.00336e-35	Up
Col5a2	208.527	117.452	299.603	2.55049	1.35078	1.71543e-09	9.08039e-08	Up
Gm35037	197.974	111.565	284.384	2.55058	1.35082	4.87519e-07	1.60647e-05	Up
Ccdc88b	265.87	149.631	382.11	2.55373	1.35261	3.24341e-06	8.51629e-05	Up
Ppl	96.1635	54.0668	138.26	2.55733	1.35464	0.000639753	0.00768438	Up
Rel	216.09	121.228	310.952	2.5647	1.35879	7.95911e-13	6.94781e-11	Up
Cebpb	967.77	542.872	1392.67	2.56552	1.35925	5.79843e-25	1.44258e-22	Up
Parp3	220.226	123.255	317.196	2.57419	1.36412	4.7198e-06	0.000117276	Up
Tmc6	204.771	114.342	295.201	2.58284	1.36896	8.94062e-06	0.000202902	Up
AU023762	46.899	26.1134	67.6846	2.59054	1.37325	0.000564106	0.00692622	Up
Sgk1	6148.93	3423.73	8874.14	2.59201	1.37407	3.32208e-13	3.08969e-11	Up
Bcl6b	61.7297	34.3616	89.0977	2.59413	1.37525	7.36611e-05	0.00124561	Up
Arl5b	1926.8	1071.87	2781.72	2.59514	1.37581	4.04593e-12	3.19548e-10	Up
Tent5c	107.278	59.5869	154.969	2.60227	1.37977	4.80141e-05	0.000869894	Up
Cela1	109.55	60.7785	158.321	2.60558	1.3816	6.40891e-07	2.03439e-05	Up
Gja3	58.7802	32.5222	85.0381	2.61179	1.38504	0.00210384	0.0198449	Up
Etv3	1803.95	998.51	2609.38	2.61301	1.38571	4.9575e-31	1.47267e-28	Up
Dusp14	1771.51	980.389	2562.63	2.61387	1.38619	6.44377e-18	9.43017e-16	Up
Wnt2	301.744	166.92	436.567	2.61665	1.38772	5.60929e-09	2.65846e-07	Up
Col3a1	405.41	223.991	586.828	2.61999	1.38956	5.85315e-09	2.73983e-07	Up
Mapk12	118.499	65.3652	171.632	2.62452	1.39206	7.44721e-09	3.41525e-07	Up
Cdk18	1690.44	929.481	2451.39	2.6374	1.39912	2.10265e-13	2.04142e-11	Up
Osmr	255.374	140.237	370.511	2.64222	1.40175	2.0377e-07	7.17812e-06	Up
Fbln2	312.022	171.269	452.775	2.64338	1.40238	5.56979e-13	5.01609e-11	Up
Shisa8	85.0472	46.7152	123.379	2.64422	1.40284	4.11627e-06	0.000104232	Up
Bcl2a1b	37.4032	20.5284	54.278	2.6462	1.40392	0.00229279	0.021314	Up
Rem2	1474.28	805.835	2142.72	2.65908	1.41093	2.945e-15	3.50334e-13	Up
Creb3l1	199.378	108.918	289.838	2.66262	1.41285	1.68441e-10	1.04438e-08	Up
Klf10	2063.95	1125.72	3002.18	2.66695	1.41519	5.03592e-20	8.86991e-18	Up
Scx	31.5774	17.1589	45.996	2.67969	1.42206	0.0018971	0.0182229	Up
Pmaip1	61.0787	33.0726	89.0848	2.69281	1.42911	4.64843e-05	0.000845683	Up
Car12	2466.83	1335.24	3598.42	2.69497	1.43027	0.000445212	0.00564758	Up
Abhd15	43.3055	23.4437	63.1672	2.6952	1.43039	0.000298093	0.00404979	Up
Itga5	119.788	64.7501	174.825	2.7004	1.43317	8.80563e-08	3.33826e-06	Up
Hmox1	286.649	154.902	418.396	2.70209	1.43407	1.06811e-09	5.88881e-08	Up
Ifrd1	2923.03	1568.66	4277.39	2.72708	1.44736	4.56186e-31	1.39684e-28	Up
Tgfb1i1	679.662	364.645	994.68	2.72805	1.44787	8.7188e-21	1.63708e-18	Up
AU020206	61.713	33.1051	90.321	2.73122	1.44954	0.00104388	0.01131	Up
Pcsk5	1006.05	536.739	1475.37	2.74831	1.45855	1.0093e-14	1.13492e-12	Up
Cacna1g	2650.14	1413.09	3887.2	2.75083	1.45987	0.00181874	0.0176233	Up
Sdcbp2	55.3882	29.4197	81.3567	2.76439	1.46696	0.000166884	0.00249736	Up
LOC118568224	25.5302	13.557	37.5035	2.76531	1.46744	0.00497675	0.0388745	Up
Sulf1	452.138	240.136	664.139	2.7661	1.46785	0.00121233	0.0127061	Up
Trip10	395.114	209.456	580.773	2.7727	1.47129	0.00247145	0.0225913	Up
Scg2	15925.1	8440.84	23409.3	2.77332	1.47161	2.09082e-22	4.29005e-20	Up
Fgl2	260.55	138.048	383.053	2.77424	1.47209	3.67742e-16	4.72205e-14	Up
Rin3	154.409	81.5819	227.235	2.78563	1.47801	3.42147e-06	8.89804e-05	Up
Chga	8122.98	4280.38	11965.6	2.79548	1.4831	4.4601e-18	6.62458e-16	Up
Gadd45a	310.084	163.36	456.809	2.79656	1.48365	5.02911e-19	8.41129e-17	Up
Igsf9	67.7611	35.6208	99.9014	2.80201	1.48646	2.27309e-06	6.25745e-05	Up
Ghsr	99.1493	51.9873	146.311	2.81472	1.49299	2.45702e-06	6.68975e-05	Up
Liph	28.3607	14.8131	41.9083	2.82691	1.49922	0.00391901	0.0323517	Up
1810062O18Rik	36.7045	19.1718	54.2372	2.82774	1.49965	0.00069227	0.00818673	Up
Dusp6	5135.57	2672.86	7598.28	2.84286	1.50734	3.46913e-33	1.19045e-30	Up
Epha2	57.6666	30.004	85.3292	2.84376	1.5078	0.000315432	0.00425053	Up
Sstr2	927.515	481.242	1373.79	2.85471	1.51334	1.02562e-15	1.26006e-13	Up
Sdk1	289.724	149.662	429.787	2.87026	1.52118	5.44384e-12	4.16726e-10	Up
Peg10	1094.09	564.641	1623.55	2.87512	1.52362	6.20038e-05	0.00108251	Up
Kcnq1	27.424	14.1217	40.7264	2.87802	1.52508	0.00381033	0.0316355	Up
Scd4	24.3048	12.5171	36.0924	2.87933	1.52573	0.00357201	0.0300354	Up
Slc10a4	21.1919	10.8885	31.4953	2.88864	1.53039	0.00459083	0.0364901	Up
Dyrk3	1423.67	731.97	2115.36	2.89047	1.5313	9.20051e-28	2.47456e-25	Up
Marchf11	230.211	118.345	342.076	2.89281	1.53247	8.3242e-13	7.20333e-11	Up
Kcne1l	352.621	180.347	524.896	2.91208	1.54205	1.38518e-12	1.13922e-10	Up
Sorcs1	764.283	390.581	1137.99	2.91359	1.5428	1.26244e-11	9.17019e-10	Up
Grasp	4464.47	2280.25	6648.69	2.91568	1.54383	2.401e-28	6.63709e-26	Up
Lrrc32	132.765	67.5887	197.941	2.92812	1.54997	4.42512e-05	0.000812324	Up
Plk2	16998.6	8581.33	25415.8	2.96179	1.56647	1.06121e-51	6.03465e-49	Up
Rprm	2696.83	1348.63	4045.02	2.99937	1.58466	9.71082e-24	2.27382e-21	Up
Fcgr2b	169.842	84.9254	254.759	3.00071	1.5853	3.28021e-08	1.34889e-06	Up
Rnf217	599.29	298.862	899.718	3.01098	1.59023	2.24025e-31	7.07742e-29	Up
Gm34583	1068.37	532.467	1604.27	3.01299	1.5912	7.68577e-14	7.80459e-12	Up
Tnc	458.649	227.68	689.619	3.02977	1.59921	4.25613e-13	3.92175e-11	Up
Stk40	2169.93	1065.66	3274.2	3.07278	1.61955	1.5704e-34	5.58137e-32	Up
Nupr1	230.829	113.2	348.458	3.07949	1.62269	9.96183e-07	3.0041e-05	Up
Dnajb5	10670.1	5227.37	16112.8	3.08243	1.62407	1.96545e-38	8.14965e-36	Up
Plpp4	448.319	219.594	677.043	3.08341	1.62453	3.34513e-11	2.31174e-09	Up
Col4a6	66.9288	32.6696	101.188	3.09848	1.63156	0.000247531	0.00348416	Up
Ptgs2os	21.0403	10.265	31.8156	3.09981	1.63218	0.0031049	0.0270091	Up
Rara	1126.23	549.281	1703.17	3.10104	1.63275	3.33562e-18	5.10683e-16	Up
Cd44	374.924	182.818	567.03	3.10243	1.6334	7.63497e-09	3.46938e-07	Up
Amigo3	89.1792	43.3808	134.978	3.11424	1.63888	5.62334e-09	2.65846e-07	Up
Mymk	25.9589	12.6081	39.3097	3.12217	1.64255	0.00409647	0.0334148	Up
Gm30092	100.446	48.7309	152.161	3.12528	1.64399	2.26378e-08	9.63355e-07	Up
Gm39283	78.5787	38.0494	119.108	3.13043	1.64636	4.10235e-06	0.000104123	Up
Gpr151	52.6078	25.3685	79.8472	3.14506	1.65309	0.000700956	0.0082796	Up
Jun	9507.57	4562.31	14452.8	3.16791	1.66353	6.75618e-68	7.07728e-65	Up
Rasl11a	814.632	389.593	1239.67	3.18196	1.66992	1.7982e-33	6.27889e-31	Up
Shisal2b	35.2302	16.8399	53.6205	3.18404	1.67086	0.00025174	0.00352595	Up
Vgf	16660.1	7920.78	25399.5	3.20669	1.68109	9.25656e-36	3.4761e-33	Up
Epcam	36.8923	17.5367	56.2479	3.21001	1.68258	0.000139283	0.00214672	Up
Thbs1	136.761	64.9579	208.565	3.21037	1.68274	5.10762e-09	2.46143e-07	Up
Gm52697	29.3039	13.8562	44.7516	3.22707	1.69022	0.000349663	0.00462079	Up
Tiparp	1789.18	842.112	2736.25	3.24947	1.70021	2.35109e-38	9.54976e-36	Up
A630023P12Rik	19.6665	9.24186	30.0912	3.25317	1.70185	0.00271051	0.024246	Up
Fancd2	214.674	100.73	328.619	3.26192	1.70572	9.30632e-13	7.91554e-11	Up
Hcrtr1	96.8067	45.4072	148.206	3.26722	1.70806	5.67191e-08	2.22221e-06	Up
C4b	1603.17	739.561	2466.78	3.33542	1.73787	0.000165306	0.00247934	Up
Arsj	255.788	117.281	394.295	3.36073	1.74878	1.61933e-20	3.0121e-18	Up
Jsrp1	186.482	85.3848	287.579	3.36863	1.75216	3.02768e-16	3.96446e-14	Up
Runx1	52.8902	24.1307	81.6497	3.38615	1.75964	7.91136e-06	0.000182668	Up
A2m	251.868	114.555	389.18	3.39762	1.76453	6.39133e-12	4.81843e-10	Up
Spry2	3290.13	1496.17	5084.09	3.3982	1.76477	2.00895e-55	1.428e-52	Up
Tagap	70.8705	32.2035	109.538	3.40689	1.76846	8.03638e-07	2.48451e-05	Up
Col8a1	84.0967	38.0823	130.111	3.41952	1.77379	4.88359e-06	0.000120444	Up
H19	33.0124	14.9591	51.0656	3.42194	1.77481	0.000811293	0.009264	Up
Igfbpl1	304.631	137.711	471.551	3.42316	1.77533	1.1045e-12	9.2964e-11	Up
Rgs4	19260.8	8705.93	29815.7	3.42473	1.77599	2.73045e-61	2.47019e-58	Up
Spint1	120.56	54.3879	186.732	3.43228	1.77917	2.0253e-06	5.62198e-05	Up
Ier5	4976.16	2238.4	7713.92	3.4463	1.78505	1.646e-52	1.02376e-49	Up
Gpr3	410.349	184.559	636.139	3.44839	1.78592	4.53143e-20	8.05259e-18	Up
Loxl2	32.6031	14.6798	50.5263	3.45053	1.78682	0.00349037	0.029502	Up
Clec18a	122.925	55.1518	190.698	3.45779	1.78985	1.58293e-06	4.55274e-05	Up
Dnajb1	4851.12	2172.41	7529.83	3.46625	1.79338	2.84556e-28	7.75824e-26	Up
Ucma	91.0796	40.6589	141.5	3.48074	1.79939	3.79818e-05	0.000717902	Up
Col11a1	178.399	79.4537	277.344	3.49053	1.80344	7.76124e-07	2.41813e-05	Up
Trib2	3772.26	1679.27	5865.25	3.49283	1.8044	3.29604e-23	7.37091e-21	Up
LOC115486416	63.8207	28.3958	99.2457	3.49486	1.80524	5.45246e-08	2.14044e-06	Up
Megf11	1354.63	601.652	2107.61	3.50259	1.80842	5.80687e-53	3.85247e-50	Up
Ecm1	249.246	110.283	388.208	3.52066	1.81585	2.70873e-12	2.15647e-10	Up
Pmepa1	2774.34	1226.84	4321.83	3.52289	1.81676	7.5846e-42	3.51061e-39	Up
Nfkbiz	429.399	189.48	669.319	3.53121	1.82016	2.1018e-23	4.75365e-21	Up
Gimap4	19.5369	8.59775	30.476	3.54873	1.8273	0.00439715	0.0352747	Up
B4galt1	472.942	206.517	739.367	3.57925	1.83966	1.1269e-26	2.95115e-24	Up
Gm34567	407.24	177.038	637.441	3.60035	1.84814	4.95016e-05	0.000894038	Up
Ret	450.832	195.377	706.288	3.6151	1.85403	1.50532e-14	1.64618e-12	Up
Tacr1	97.9244	42.3203	153.529	3.62899	1.85957	2.1143e-09	1.10159e-07	Up
Fam167a	170.801	73.3558	268.245	3.65744	1.87083	1.83675e-13	1.80974e-11	Up
Gm13791	20.0582	8.59931	31.5171	3.66365	1.87328	0.00220413	0.0206442	Up
Errfi1	4239.96	1818.2	6661.72	3.66387	1.87337	3.12647e-31	9.72284e-29	Up
Nedd9	1006.37	430.488	1582.24	3.67487	1.87769	1.26986e-47	6.8308e-45	Up
Flnc	174.672	74.3768	274.966	3.69849	1.88694	2.42599e-12	1.95484e-10	Up
Sv2c	1486.56	630.926	2342.2	3.71194	1.89217	1.65746e-20	3.05448e-18	Up
C5ar1	33.5186	14.2134	52.8238	3.71895	1.8949	7.13163e-05	0.0012111	Up
Aspg	100.059	41.6738	158.444	3.80401	1.92752	1.01618e-10	6.54535e-09	Up
Gm29593	57.339	23.7525	90.9256	3.82285	1.93465	2.60976e-07	9.09667e-06	Up
Mfap4	329.007	136.358	521.655	3.82621	1.93592	0.000454146	0.00574991	Up
Lipg	71.748	29.686	113.81	3.82976	1.93726	1.25136e-06	3.69522e-05	Up
Tcim	126.247	52.2222	200.271	3.83423	1.93894	5.24384e-13	4.76567e-11	Up
Drd1	374.506	154.435	594.576	3.84837	1.94425	2.39453e-30	7.00857e-28	Up
Aldh1l2	248.228	102.225	394.23	3.858	1.94785	1.5655e-10	9.86902e-09	Up
Krt87	20.2866	8.30324	32.2699	3.89393	1.96123	0.00367	0.0306988	Up
Htr1d	13.8532	5.64268	22.0638	3.91592	1.96935	0.00618716	0.0458992	Up
Ctla2a	494.781	201.008	788.555	3.92298	1.97195	5.24875e-15	6.03849e-13	Up
Gm46272	149.444	60.5763	238.313	3.93497	1.97635	3.24879e-10	1.93595e-08	Up
Fosl2	5183.58	2094.8	8272.36	3.94872	1.98139	9.80891e-62	9.29651e-59	Up
Gm31308	19.6787	7.92307	31.4343	3.96413	1.987	0.000618918	0.0074525	Up
Pik3r6	174.145	69.9614	278.328	3.97775	1.99195	8.93615e-10	4.99596e-08	Up
Sik1	877.693	351.609	1403.78	3.99262	1.99733	8.039e-39	3.47826e-36	Up
Dusp1	2393.17	958.632	3827.7	3.99296	1.99746	1.18527e-56	9.07327e-54	Up
Egr3	10432.1	4176.74	16687.5	3.99531	1.99831	8.33216e-46	4.36408e-43	Up
Pappa	90.1042	35.9624	144.246	4.00954	2.00344	1.44049e-09	7.76964e-08	Up
LOC118568243	317.36	125.657	509.063	4.05144	2.01844	1.12039e-25	2.85886e-23	Up
Gm35569	27.7019	10.8908	44.513	4.08732	2.03116	0.000408199	0.0052585	Up
Lif	49.6423	19.5064	79.7781	4.09027	2.0322	4.786e-08	1.89752e-06	Up
Dnmt3l	20.5069	7.96473	33.0491	4.15651	2.05537	0.00040866	0.00526104	Up
Fam169b	30.0107	11.554	48.4674	4.19231	2.06775	0.000126158	0.00197866	Up
Plb1	107.056	40.6645	173.448	4.26668	2.09311	4.63141e-11	3.12471e-09	Up
Prokr2	416.388	158.022	674.755	4.27016	2.09429	1.53464e-18	2.44351e-16	Up
Serpina3g	195.739	74.2254	317.252	4.27482	2.09586	6.21794e-10	3.57675e-08	Up
Akr1b8	54.1062	20.4655	87.7469	4.28821	2.10037	0.000335193	0.00446543	Up
Zfp36	501.281	189.422	813.139	4.29408	2.10235	1.98679e-16	2.65389e-14	Up
Slc4a11	13.2302	4.97871	21.4817	4.3189	2.11066	0.00372735	0.031118	Up
Cda	53.6492	19.9156	87.3828	4.39535	2.13598	3.95218e-08	1.59231e-06	Up
Hspb6	401.136	147.256	655.016	4.44875	2.1534	0.000178143	0.00264202	Up
Gm32216	61.3718	22.533	100.211	4.45083	2.15407	6.04666e-06	0.000145171	Up
Gxylt2	178.401	65.0381	291.765	4.48459	2.16498	1.32374e-23	3.06354e-21	Up
Serinc2	527.939	192.313	863.566	4.49224	2.16744	4.18711e-44	2.03259e-41	Up
Sox11	1573.77	569.934	2577.61	4.52318	2.17734	6.70258e-54	4.60005e-51	Up
Scube1	1909.88	690.78	3128.98	4.52955	2.17937	7.3847e-06	0.000171933	Up
Tmem40	57.7317	20.8509	94.6124	4.53964	2.18258	0.000349873	0.00462079	Up
Blnk	473.615	169.813	777.417	4.57701	2.19441	2.96458e-25	7.46887e-23	Up
Ahnak2	52.5956	18.8651	86.3262	4.58044	2.19549	4.56378e-07	1.51388e-05	Up
Plaur	43.2908	15.5028	71.0789	4.584	2.19661	7.66844e-07	2.396e-05	Up
Dusp4	1694.81	604.413	2785.21	4.60775	2.20406	1.55555e-69	1.82119e-66	Up
Th	60.6159	21.5301	99.7017	4.63531	2.21267	2.23319e-09	1.15447e-07	Up
Fosl1	22.4054	7.96512	36.8457	4.63625	2.21296	0.000343794	0.0045611	Up
Npy	5028.11	1779.66	8276.55	4.65068	2.21744	3.48304e-43	1.65055e-40	Up
Mmp19	46.7691	16.5652	76.973	4.65346	2.2183	9.38167e-07	2.84206e-05	Up
Cd14	199.496	70.4169	328.575	4.6679	2.22277	4.53222e-15	5.30616e-13	Up
Slc18a2	158.73	55.8341	261.625	4.68506	2.22807	1.51181e-22	3.20102e-20	Up
Sertad1	750.448	262.947	1237.95	4.70882	2.23537	1.928e-27	5.1164e-25	Up
Ly6g6e	434.01	151.56	716.46	4.72746	2.24107	0.000997197	0.0109171	Up
Arhgef16	18.002	6.28835	29.7157	4.72777	2.24116	0.00136499	0.0140268	Up
Retn	12.3559	4.30559	20.4061	4.74202	2.2455	0.00499539	0.0389895	Up
Tnfrsf12a	338.175	117.501	558.849	4.75792	2.25033	4.69916e-14	4.87122e-12	Up
Gm9748	14.4789	4.94931	24.0086	4.84749	2.27724	0.000708025	0.00833836	Up
Endou	67.9692	23.2271	112.711	4.8611	2.28128	2.5594e-09	1.31709e-07	Up
Egr1	19488.9	6629.61	32348.3	4.87945	2.28672	9.06852e-46	4.62797e-43	Up
Acvr1c	1664.22	565.161	2763.28	4.88832	2.28934	2.83911e-63	2.82534e-60	Up
Trib1	1194.87	399.848	1989.9	4.97743	2.3154	2.07678e-52	1.25255e-49	Up
Megf6	374.01	124.78	623.239	4.99395	2.32018	2.592e-05	0.00051383	Up
Bdnf	5463.28	1809.04	9117.52	5.03977	2.33336	2.31718e-97	5.12433e-94	Up
Far2os1	14.2018	4.65169	23.7519	5.1171	2.35533	0.000928119	0.0103255	Up
Tll1	340.476	111.138	569.814	5.12552	2.3577	8.7012e-22	1.76714e-19	Up
Socs3	146.001	47.5483	244.453	5.142	2.36233	5.7307e-11	3.81465e-09	Up
Hspb1	431.7	140.541	722.86	5.14381	2.36284	6.08796e-06	0.000145811	Up
Olfm4	531.558	172.298	890.818	5.1713	2.37053	2.60881e-44	1.29808e-41	Up
Gm32820	21.4184	6.92137	35.9155	5.185	2.37434	5.85958e-05	0.00102933	Up
Slc23a3	35.8783	11.5441	60.2126	5.20794	2.38071	0.000115722	0.00183523	Up
Bag3	1077.04	343.172	1810.92	5.27718	2.39977	2.40379e-41	1.08733e-38	Up
Dusp5	2156.66	681.22	3632.11	5.33242	2.41479	1.35657e-52	8.7096e-50	Up
Angpt2	85.6506	26.9853	144.316	5.3416	2.41727	7.55496e-12	5.65287e-10	Up
Ssc5d	61.4347	19.2238	103.646	5.39942	2.4328	7.83486e-08	2.9873e-06	Up
Inmt	46.6084	14.5893	78.6275	5.39992	2.43294	4.47069e-08	1.78317e-06	Up
Lemd1	24.364	7.57813	41.1498	5.42039	2.4384	1.70351e-05	0.000354655	Up
Junb	11609.9	3599.9	19620	5.45028	2.44633	1.99271e-56	1.46892e-53	Up
Gm15764	27.9566	8.58976	47.3235	5.50404	2.46049	4.37972e-06	0.000109924	Up
Tex26	10.8341	3.32336	18.3449	5.53559	2.46874	0.00252287	0.0229177	Up
Gfap	47176.3	14424.8	79927.8	5.54098	2.47014	4.68728e-08	1.86582e-06	Up
Gm40594	14.061	4.28417	23.8378	5.55122	2.47281	0.000660301	0.00789782	Up
Col27a1	271.013	82.4756	459.551	5.57167	2.47811	1.46434e-05	0.000311708	Up
Gadd45b	2200.03	664.638	3735.41	5.62049	2.4907	2.46284e-52	1.4417e-49	Up
Snx31	28.6465	8.58976	48.7032	5.67285	2.50407	5.00217e-05	0.000900978	Up
Rgs2	6319.81	1891.83	10747.8	5.68105	2.50616	1.67301e-74	2.08112e-71	Up
5033406O09Rik	12.2616	3.65077	20.8724	5.73372	2.51947	0.00199541	0.018975	Up
Csrnp1	1239.7	367.107	2112.3	5.75395	2.52455	1.73966e-88	3.14769e-85	Up
Sdc1	140.544	41.3675	239.72	5.79882	2.53576	5.04909e-24	1.19633e-21	Up
Cdkn1a	1099.77	321.343	1878.2	5.84482	2.54716	1.39444e-34	5.04611e-32	Up
Trhr2	11.2937	3.2924	19.295	5.85152	2.54881	0.00119656	0.0125855	Up
Mei1	38.7259	11.2686	66.1831	5.87916	2.55561	1.36332e-07	5.02484e-06	Up
Gm11816	20.5079	5.93992	35.0759	5.89393	2.55923	0.000119814	0.00188958	Up
5330416C01Rik	59.6549	17.2078	102.102	5.93869	2.57015	1.64885e-10	1.02875e-08	Up
Asb4	30.8443	8.87668	52.8119	5.94098	2.5707	3.72839e-05	0.000705382	Up
Ier2	1349.33	387.661	2311	5.96281	2.57599	2.73343e-58	2.17614e-55	Up
Gm14637	93.5919	26.6682	160.516	6.00968	2.58729	3.28565e-10	1.95207e-08	Up
Nfil3	1358.37	387.075	2329.66	6.02033	2.58984	1.46189e-78	2.07829e-75	Up
Adamts18	74.1713	21.0763	127.266	6.02744	2.59155	7.15118e-11	4.6513e-09	Up
Gpr65	9.28712	2.63836	15.9359	6.03802	2.59408	0.00340332	0.0289719	Up
Prss23	2375.56	669.94	4081.18	6.09197	2.60691	3.23164e-14	3.40314e-12	Up
B3gnt8	39.6666	11.1555	68.1777	6.09706	2.60811	1.13091e-06	3.36955e-05	Up
Bpifb1	15.3096	4.27347	26.3457	6.14874	2.62029	0.000226733	0.00323721	Up
LOC118568135	8.31054	2.30141	14.3197	6.20734	2.63398	0.00648993	0.0475061	Up
Gpnmb	372.307	102.303	642.312	6.27843	2.6504	2.42076e-08	1.02294e-06	Up
Bcl3	31.3368	8.60807	54.0656	6.28967	2.65298	5.80391e-05	0.00102136	Up
Tubb6	201.651	55.3539	347.948	6.29187	2.65349	7.6872e-17	1.04793e-14	Up
Gm42031	14.6574	4.03776	25.2771	6.30363	2.65618	0.00268929	0.0240995	Up
C030004G16Rik	39.8361	10.6019	69.0704	6.52328	2.7056	8.24571e-10	4.64913e-08	Up
Hspa1a	1137.98	302.256	1973.7	6.52992	2.70707	1.66432e-05	0.000349051	Up
Hspa1b	1581.55	413.401	2749.7	6.65155	2.73369	6.07185e-06	0.0001456	Up
Ntf5	16.4786	4.31513	28.642	6.65158	2.7337	0.000394979	0.00511252	Up
Ifi202b	11.3507	2.94474	19.7567	6.67535	2.73884	0.00245294	0.0224878	Up
Sfrp5	7.6418	1.99425	13.2894	6.68773	2.74152	0.00695298	0.0499946	Up
Tmem252	213.694	55.4628	371.925	6.7056	2.74537	5.19525e-05	0.000930703	Up
Prlr	467.585	121.298	813.873	6.71149	2.74663	3.4408e-06	8.92859e-05	Up
Ecel1	371.31	95.9259	646.695	6.741	2.75296	8.20977e-06	0.000188248	Up
Gadd45g	2908.79	747.454	5070.13	6.78318	2.76196	2.49952e-91	4.97479e-88	Up
Aldh1a3	86.6009	22.0765	151.125	6.84208	2.77444	2.26524e-08	9.63355e-07	Up
Adgrf4	147.897	37.714	258.081	6.84334	2.7747	2.07444e-14	2.24389e-12	Up
Kif18a	171.117	43.1773	299.057	6.91999	2.79077	2.07334e-21	4.08571e-19	Up
Gm4208	23.8923	5.99229	41.7922	6.98853	2.80499	4.39608e-05	0.000810222	Up
Adm	107.603	26.7128	188.494	7.05017	2.81766	2.62826e-18	4.05506e-16	Up
Batf3	40.5612	9.9693	71.153	7.15055	2.83805	9.70302e-09	4.33221e-07	Up
Capn11	20.3708	4.99857	35.743	7.16807	2.84158	0.00146225	0.014841	Up
Gm39429	154.567	37.8107	271.322	7.18163	2.84431	2.47795e-13	2.34851e-11	Up
Gldn	146.682	35.672	257.692	7.2235	2.8527	1.93613e-26	5.00452e-24	Up
Rflna	21.9124	5.33669	38.4881	7.24839	2.85766	1.31971e-05	0.000285087	Up
Egr4	5830.35	1399.25	10261.5	7.33368	2.87454	2.23186e-18	3.4977e-16	Up
Kcnj2	1566.05	374.035	2758.06	7.37323	2.8823	2.45605e-13	2.33889e-11	Up
Bmp3	993.227	231.296	1755.16	7.58508	2.92316	2.295e-39	1.01505e-36	Up
Ip6k3	18.7309	4.29527	33.1665	7.72616	2.94975	2.30357e-05	0.000464048	Up
Cass4	64.3685	14.5924	114.145	7.83524	2.96998	2.63799e-14	2.82279e-12	Up
Nr4a1	10656.4	2410.63	18902.2	7.84151	2.97113	1.78676e-114	5.92699e-111	Up
Ccn1	871.088	194.074	1548.1	7.97659	2.99577	4.08048e-12	3.21003e-10	Up
Ccl3	23.8138	5.29658	42.331	7.99841	2.99971	1.69009e-05	0.000352597	Up
Pcdh8	11202.8	2435.56	19970	8.19895	3.03544	2.0659e-129	8.22354e-126	Up
LOC118567915	1004.34	217.6	1791.08	8.23336	3.04148	6.39198e-61	5.53128e-58	Up
Lox	110.353	23.7838	196.922	8.27956	3.04955	0.00162086	0.0160737	Up
Gem	327.785	70.1666	585.404	8.34761	3.06136	4.84496e-31	1.46105e-28	Up
Oit3	9.39341	1.99386	16.793	8.44137	3.07748	0.000993007	0.0108892	Up
Apold1	560.528	117.101	1003.95	8.57647	3.10038	4.94205e-60	4.0984e-57	Up
Maff	177.185	35.1788	319.192	9.08602	3.18365	1.12756e-21	2.26686e-19	Up
Gm13749	8.32119	1.64698	14.9954	9.09006	3.18429	0.00399116	0.0327056	Up
Taf7l	6.69877	1.30925	12.0883	9.17206	3.19725	0.00520687	0.0402405	Up
Ccl2	20.2139	3.98694	36.4408	9.17375	3.19751	4.56005e-06	0.000114018	Up
Otos	125.088	24.4721	225.703	9.22386	3.20537	0.000118531	0.00187232	Up
Gm41442	118.938	23.0984	214.778	9.28888	3.2155	6.65063e-30	1.89096e-27	Up
Cxcl1	10.4396	1.98354	18.8956	9.51493	3.25019	0.000754189	0.00875352	Up
Ptx3	54.1305	10.2352	98.0259	9.57855	3.25981	5.81124e-11	3.85537e-09	Up
Pim1	354.323	66.5468	642.1	9.6561	3.27144	2.51439e-68	2.78021e-65	Up
Arc	31070.9	5739.5	56402.3	9.82723	3.29678	1.12283e-113	3.19252e-110	Up
Ppm1j	12.4471	2.29148	22.6027	9.8303	3.29724	0.0041994	0.0340867	Up
Penk	4952.04	909.704	8994.38	9.8873	3.30558	3.05458e-10	1.83672e-08	Up
5031425F14Rik	9.25207	1.63666	16.8675	10.2519	3.35782	0.00548935	0.04186	Up
Gm35853	7.48819	1.32911	13.6473	10.3064	3.36546	0.00198049	0.0188782	Up
Gm6999	58.5481	9.8887	107.208	10.827	3.43657	9.71667e-17	1.31558e-14	Up
Cd1d1	100.109	16.9606	183.256	10.8336	3.43744	9.63634e-16	1.19125e-13	Up
Fcgr4	37.7049	6.32729	69.0824	10.9576	3.45386	2.12075e-07	7.4312e-06	Up
Wnt9b	79.9587	13.2399	146.677	11.0794	3.46981	3.02609e-16	3.96446e-14	Up
Rufy4	7.98972	1.3184	14.661	11.1034	3.47293	0.00154446	0.0154488	Up
Gm32186	5.97228	0.981452	10.9631	11.1036	3.47295	0.00493792	0.0385863	Up
Dsc1	15.9377	2.61772	29.2577	11.1144	3.47436	1.32066e-05	0.000285087	Up
Tdrd9	10.1451	1.65613	18.6341	11.2694	3.49434	0.00068911	0.00815905	Up
Arl4d	3162.12	515.092	5809.15	11.2781	3.49545	7.18346e-21	1.37473e-18	Up
Gm32585	20.5246	3.31187	37.7374	11.4072	3.51187	1.50032e-06	4.35291e-05	Up
Vgll2	12.3223	1.98354	22.6611	11.4284	3.51455	5.29918e-05	0.000946611	Up
Myo1a	27.151	4.30403	49.9981	11.6279	3.53952	4.53209e-05	0.000826785	Up
Rbp3	18.8247	2.98524	34.6642	11.638	3.54077	2.93866e-06	7.82974e-05	Up
Btg2	6453.36	1018.46	11888.3	11.6724	3.54503	4.01852e-132	1.99951e-128	Up
Agmat	29.737	4.6513	54.8228	11.8153	3.56259	1.8676e-07	6.66143e-06	Up
Gm31097	23.4733	3.64921	43.2973	11.8947	3.57224	9.41449e-08	3.53541e-06	Up
C2cd4a	170.715	26.4401	314.99	11.9125	3.5744	3.46678e-29	9.71821e-27	Up
Timp1	117.044	17.2093	216.878	12.6061	3.65605	6.3204e-07	2.01918e-05	Up
Cryba2	18.132	2.66815	33.5958	12.6474	3.66077	9.21039e-05	0.00151	Up
Scgb1c1	6.93545	0.991771	12.8791	12.9656	3.69662	0.00375199	0.0312176	Up
Gm5532	14.6077	1.97361	27.2417	13.7689	3.78335	2.6982e-05	0.00053118	Up
C2cd4b	729.823	97.9858	1361.66	13.9023	3.79725	2.08629e-81	3.19411e-78	Up
Dgat2l6	37.033	4.94892	69.117	13.957	3.80292	9.73488e-12	7.20272e-10	Up
Nptx2	8597.72	1148.53	16046.9	13.9718	3.80444	3.01676e-102	7.50532e-99	Up
Serpinf2	106.392	13.8852	198.899	14.3321	3.84118	1.4237e-21	2.8336e-19	Up
Ptgs2	7690.71	983.564	14397.9	14.638	3.87164	1.89183e-82	3.13776e-79	Up
Ccn4	143.397	18.14	268.654	14.7893	3.88648	4.13878e-38	1.64748e-35	Up
Depp1	321.364	40.6533	602.075	14.8103	3.88853	7.43269e-13	6.51686e-11	Up
Areg	21.5013	2.62765	40.3749	15.2973	3.9352	1.88525e-08	8.15698e-07	Up
Rgs1	21.8731	2.64868	41.0976	15.5407	3.95798	8.81151e-07	2.69394e-05	Up
LOC118568080	11.1237	1.33943	20.908	15.7613	3.97832	8.35301e-05	0.00139005	Up
Serpina3i	8.65678	0.991771	16.3218	16.4646	4.0413	0.000259705	0.0036273	Up
F2rl2	31.9691	3.60833	60.3299	16.6495	4.05741	7.48671e-09	3.42547e-07	Up
Gm36876	9.20427	0.99216	17.4164	17.5532	4.13366	0.000219203	0.00314549	Up
Otop1	9.16528	0.981063	17.3495	17.5587	4.13412	0.000535661	0.00663426	Up
Padi4	9.47813	0.981841	17.9744	18.2085	4.18654	0.00193847	0.0185309	Up
Npas4	6756.6	690.963	12822.2	18.5572	4.21391	4.60371e-32	1.50209e-29	Up
Dsg1c	19.5356	1.97322	37.0979	18.752	4.22898	7.79532e-07	2.42044e-05	Up
Egr2	1829.52	183.19	3475.85	18.9749	4.24602	5.89681e-13	5.22126e-11	Up
Gm41693	10.0079	0.99216	19.0237	19.1827	4.26173	8.81312e-05	0.00145566	Up
Fndc9	383.082	36.9618	729.201	19.7146	4.30119	1.65645e-77	2.19789e-74	Up
Ccl4	31.0829	2.96616	59.1997	19.933	4.31708	3.37453e-07	1.14809e-05	Up
Rps15a-ps5	56.1103	5.28587	106.935	20.2314	4.33852	0.000373765	0.00488446	Up
Gm51447	48.181	4.28456	92.0774	21.4639	4.42384	2.96222e-14	3.13602e-12	Up
Htr2b	4.01485	0.327021	7.70268	21.6703	4.43764	0.00641792	0.0471002	Up
Inhba	2342.25	201.76	4482.75	22.2129	4.47333	6.73928e-191	1.34132e-186	Up
Fos	11021.4	935.072	21107.8	22.5739	4.49658	1.44453e-36	5.52895e-34	Up
Serpine1	169.72	14.2324	325.208	22.8726	4.51555	2.60706e-35	9.60894e-33	Up
Cyp2a5	8.23417	0.664361	15.804	23.8579	4.5764	0.000418093	0.00535132	Up
Col10a1	16.7656	1.31879	32.2124	24.3628	4.60661	6.21087e-07	1.99701e-05	Up
Gm31740	33.7451	2.64829	64.8419	24.5223	4.61602	6.66962e-12	5.00926e-10	Up
Gm35748	8.68008	0.654431	16.7057	25.3169	4.66203	0.000220644	0.00315934	Up
6430628N08Rik	9.18991	0.66475	17.7151	26.765	4.74228	0.000144711	0.00220873	Up
Krt14	9.16094	0.654431	17.6675	26.8178	4.74512	0.00113779	0.0120519	Up
Gm13715	14.8346	0.98223	28.6869	28.974	4.85669	1.12176e-05	0.000247248	Up
Vnn3	9.92019	0.654431	19.1859	29.0927	4.86259	0.000567007	0.00694698	Up
Gal	284.399	18.8964	549.902	29.1203	4.86396	4.15249e-18	6.22778e-16	Up
Glycam1	26.0034	1.66606	50.3408	30.4079	4.92637	1.90063e-08	8.20567e-07	Up
Cyp2g1	2.8277	0	5.65539	31.0158	4.95493	0.00656676	0.0478924	Up
Spink2	5.68366	0.33734	11.03	31.0396	4.95604	0.000990619	0.0108817	Up
Gm40076	2.83565	0	5.67131	31.0926	4.9585	0.00630903	0.0465586	Up
Gm51808	2.8694	0	5.73879	31.4193	4.97358	0.00663879	0.0482837	Up
Serpina11	11.4604	0.66475	22.2561	33.6573	5.07285	3.28999e-05	0.000633275	Up
Bpifb3	11.6698	0.65482	22.6848	34.3869	5.10379	6.78399e-05	0.00116599	Up
Fosb	6606.24	355.008	12857.5	36.2211	5.17876	1.22281e-162	1.21688e-158	Up
Itga2	82.861	4.27386	161.448	37.7236	5.2374	3.08301e-07	1.05978e-05	Up
Cym	19.7664	1.00209	38.5307	38.7762	5.2771	7.74316e-08	2.95801e-06	Up
Calcr	7.45277	0.32741	14.5781	40.9729	5.3566	0.000508162	0.00635299	Up
Fgf21	7.76916	0.327021	15.2113	42.853	5.42132	0.000353861	0.00466726	Up
Gm30551	58.1443	2.64868	113.64	42.9716	5.42531	8.21815e-19	1.35178e-16	Up
Serpina9	38.2178	1.64659	74.7889	45.2842	5.50093	2.4861e-12	1.99519e-10	Up
Tnfsf11	4.50727	0	9.01453	49.4175	5.62695	0.000470525	0.00591589	Up
Sval1	5.28354	0	10.5671	57.9921	5.85778	0.000332925	0.00444116	Up
Atf3	1046.66	34.9816	2058.34	58.7905	5.87751	5.50207e-151	3.65026e-147	Up
Serpinb2	11.3947	0.327021	22.4623	63.1964	5.98177	2.58264e-05	0.000512485	Up
Phox2a	5.78759	0	11.5752	63.5033	5.98876	0.000416638	0.00534645	Up
Bpifa5	6.01713	0	12.0343	65.9654	6.04364	0.000197612	0.00288772	Up
Klk1b26	6.29578	0	12.5916	69.0585	6.10975	0.000730554	0.00852798	Up
Glra1	12.7501	0.32741	25.1729	70.8881	6.14747	3.87784e-05	0.000729496	Up
Drd4	59.7267	1.65652	117.797	71.2244	6.1543	4.79026e-15	5.57547e-13	Up
Gjb4	37.0509	0.981063	73.1208	73.9059	6.20762	8.74198e-10	4.90117e-08	Up
Lce1g	6.80069	0	13.6014	74.6172	6.22144	3.06762e-05	0.000595076	Up
Msx3	56.5085	1.3295	111.687	84.1147	6.39429	0.00145712	0.014804	Up
Krt75	75.1617	1.64659	148.677	90.043	6.49254	9.0484e-19	1.46415e-16	Up
Tgm1	75.6559	1.32911	149.983	113.076	6.82115	6.25294e-06	0.000148816	Up
Sprr1a	19.5421	0	39.0841	214.296	7.74346	0.000527907	0.00656684	Up
Trh	605.807	3.61981	1207.99	333.544	8.38173	3.29266e-06	8.61154e-05	Up
Etv3l	218.603	0.981452	436.225	439.976	8.78128	1.20746e-24	2.89543e-22	Up
Krt6a	102.533	0.327021	204.739	576.25	9.17055	2.20764e-13	2.13295e-11	Up
