# Supplementary material for: Integrating Proteomics and Transcriptomics Reveals the Potential Pathways of Hippocampal Neuron Apoptosis in Dravet Syndrome Model Mice
Source: Int J Mol Sci. 2024 Apr 18;25(8):4457. doi: 10.3390/ijms25084457 (PMC11050081; doi:10.3390/ijms25084457)
Supplement: Supplementary file 1 [file ijms-25-04457-s001.zip › supplementary Table S5.xlsx]

## Sheet: Sheet1
Genome_mapping_stat
Sample	Total reads	Total mapped reads	Multiple mapped	Uniquely mapped	Read-1	Read-2	Reads map to '+'	Reads map to '-'	Non-splice reads	Splice reads	Reads mapped in proper pairs
KO_1	47677840	47236233(99.07%)	3468759(7.28%)	43767474(91.80%)	21909407(45.95%)	21858067(45.85%)	21877287(45.89%)	21890187(45.91%)	27952042(58.63%)	15815432(33.17%)	43463042(91.16%)
KO_2	47695536	47208962(98.98%)	3869928(8.11%)	43339034(90.87%)	21704578(45.51%)	21634456(45.36%)	21662918(45.42%)	21676116(45.45%)	27960141(58.62%)	15378893(32.24%)	43021072(90.20%)
KO_3	48459564	47958072(98.97%)	3680045(7.59%)	44278027(91.37%)	22180683(45.77%)	22097344(45.60%)	22132518(45.67%)	22145509(45.70%)	28108292(58.00%)	16169735(33.37%)	43959918(90.71%)
WT_1	47521334	47098995(99.11%)	3473965(7.31%)	43625030(91.80%)	21841636(45.96%)	21783394(45.84%)	21806677(45.89%)	21818353(45.91%)	27794351(58.49%)	15830679(33.31%)	43332454(91.19%)
WT_2	47772866	47284392(98.98%)	4002220(8.38%)	43282172(90.60%)	21681361(45.38%)	21600811(45.22%)	21633489(45.28%)	21648683(45.32%)	28812562(60.31%)	14469610(30.29%)	42951062(89.91%)
WT_3	48178218	47762198(99.14%)	3621079(7.52%)	44141119(91.62%)	22091185(45.85%)	22049934(45.77%)	22065745(45.80%)	22075374(45.82%)	29308411(60.83%)	14832708(30.79%)	43868812(91.06%)
